# Supplementary material
Source: ML conference proceedings conference paper supplement (https://aclanthology.org/D19-1090)
Supplement: Attachment [file D19-1090.Attachment.zip]

## A Model descriptions

Artetxe et al. (2016) propose to learn a linear transformation matrix  $W$  between a source language space  $X$  and a target language space  $Z$ . The transformation matrix is enforced to be orthogonal ( $W^\top W = I$ ) and the embedding matrices are length normalized and mean centered.

Artetxe et al. (2017) add a self-learning loop to the previous approach. They use the learned transformation matrix  $W$  to induce a bilingual dictionary by mapping each source language word to its nearest neighbour in the cross-lingual embedding space. These generated translation pairs are then used at the next iteration to learn a new translation matrix until a convergence criterion is reached.

Ruder et al. (2018) view self-learning as Expectation-Maximization and augment the seed lexicon in a latent-variable model. The source words  $\{w_{L1}^i\}_{i=1}^K$  and target words  $\{w_{L2}^j\}_{j=1}^K$  are seen as a fully connected bipartite weighted graph  $G = (E, V_{L1} \cup V_{L2})$  with edges  $E = V_{L1} \times V_{L2}$ . By drawing embeddings from a Gaussian distribution and normalizing them, the weight of each edge  $(i, j) \in E$  is shown to correspond to the cosine similarity between vectors. In the E-step, a maximal bipartite matching is found on the sparsified graph using the Jonker-Volgenant algorithm (Jonker and Volgenant, 1987). In the M-step, a better projection  $W_{L1}$  is learned solving the Procrustes problem.

## B Hyper-parameter settings

For the model of Ruder et al. (2018), we set the parameter  $k$  to 15.  $k$  controls the number of candidate target words considered for each source word during matching (induction of a new dictionary). We experimented with different values of  $k$  and found that higher values of  $k$  yield better performance. Following Ruder et al. (2018) we also employed a rank constraint and had the model consider only 40,000 most frequent words during the matching. This speeds up the training and often also leads to improved performance.

## C All results

| Constraint         | Normal       |   |              |   | Lexeme   |   |       |   |
|--------------------|--------------|---|--------------|---|----------|---|-------|---|
|                    | In vocab     |   | +OOVs        |   | In vocab |   | +OOVs |   |
|                    | ✗            | ✓ | ✗            | ✓ | ✗        | ✓ | ✗     | ✓ |
| Czech–Polish       | 49.3 (3161)  | - | 40.9 (4166)  | - | 84.5     | - | 78.2  | - |
| Czech–Russian      | 44.5 (3562)  | - | 37.3 (4762)  | - | 87.1     | - | 82.9  | - |
| Czech–Slovak       | 53.1 (802)   | - | 45.5 (1027)  | - | 90.9     | - | 88.7  | - |
| Czech–Ukrainian    | 32.4 (673)   | - | 26.7 (854)   | - | 84.1     | - | 80.2  | - |
| Polish–Czech       | 40.0 (4043)  | - | 32.9 (5332)  | - | 82.4     | - | 76.7  | - |
| Polish–Russian     | 47.0 (6814)  | - | 40.3 (9079)  | - | 84.9     | - | 82.2  | - |
| Polish–Slovak      | 25.0 (1217)  | - | 19.8 (1689)  | - | 81.0     | - | 78.4  | - |
| Polish–Ukrainian   | 29.9 (1118)  | - | 24.8 (1463)  | - | 75.2     | - | 72.0  | - |
| Russian–Czech      | 32.0 (5708)  | - | 26.5 (7538)  | - | 79.5     | - | 75.7  | - |
| Russian–Polish     | 40.2 (9183)  | - | 35.0 (11697) | - | 83.1     | - | 80.4  | - |
| Russian–Slovak     | 21.1 (1610)  | - | 18.0 (2150)  | - | 79.9     | - | 77.5  | - |
| Russian–Ukrainian  | 45.0 (1165)  | - | 42.2 (1396)  | - | 85.2     | - | 83.7  | - |
| Slovak–Czech       | 47.8 (858)   | - | 39.3 (1154)  | - | 90.2     | - | 88.6  | - |
| Slovak–Polish      | 25.8 (830)   | - | 21.0 (1094)  | - | 82.8     | - | 81.8  | - |
| Slovak–Russian     | 11.8 (814)   | - | 9.1 (1140)   | - | 82.6     | - | 81.7  | - |
| Slovak–Ukrainian   | 20.0 (330)   | - | 16.7 (425)   | - | 83.0     | - | 81.6  | - |
| Ukrainian–Czech    | 34.3 (699)   | - | 29.3 (869)   | - | 82.0     | - | 77.3  | - |
| Ukrainian–Polish   | 44.6 (850)   | - | 38.6 (1054)  | - | 82.9     | - | 79.2  | - |
| Ukrainian–Russian  | 61.3 (786)   | - | 56.5 (933)   | - | 90.5     | - | 89.8  | - |
| Ukrainian–Slovak   | 18.6 (322)   | - | 15.7 (420)   | - | 84.8     | - | 83.6  | - |
| Catalan–French     | 56.5 (5605)  | - | 33.8 (11367) | - | 82.8     | - | 54.6  | - |
| Catalan–Italian    | 53.8 (5518)  | - | 30.7 (11970) | - | 83.1     | - | 53.4  | - |
| Catalan–Portuguese | 63.3 (5418)  | - | 41.8 (10759) | - | 84.5     | - | 60.0  | - |
| Catalan–Spanish    | 69.3 (5879)  | - | 45.0 (12282) | - | 86.3     | - | 60.3  | - |
| French–Catalan     | 41.6 (7845)  | - | 23.9 (16992) | - | 79.4     | - | 52.2  | - |
| French–Italian     | 49.4 (9891)  | - | 28.3 (22052) | - | 83.1     | - | 55.4  | - |
| French–Portuguese  | 49.5 (8930)  | - | 31.9 (17536) | - | 81.0     | - | 58.1  | - |
| French–Spanish     | 49.1 (9770)  | - | 29.3 (21087) | - | 82.7     | - | 55.2  | - |
| Italian–Catalan    | 36.6 (9035)  | - | 18.7 (22636) | - | 77.2     | - | 49.4  | - |
| Italian–French     | 40.8 (12595) | - | 21.4 (31419) | - | 79.3     | - | 53.4  | - |
| Italian–Portuguese | 43.0 (10072) | - | 21.0 (25704) | - | 79.2     | - | 50.3  | - |
| Italian–Spanish    | 43.6 (11685) | - | 22.6 (30686) | - | 78.9     | - | 52.2  | - |
| Portuguese–Catalan | 49.2 (7199)  | - | 28.2 (16059) | - | 81.0     | - | 53.1  | - |
| Portuguese–French  | 48.7 (9664)  | - | 27.4 (22437) | - | 81.4     | - | 52.4  | - |
| Portuguese–Italian | 46.9 (8939)  | - | 25.6 (20757) | - | 80.2     | - | 52.6  | - |
| Portuguese–Spanish | 60.6 (9275)  | - | 37.3 (22638) | - | 85.8     | - | 58.9  | - |
| Spanish–Catalan    | 50.4 (8291)  | - | 30.4 (18442) | - | 79.1     | - | 53.2  | - |
| Spanish–French     | 46.9 (11457) | - | 25.8 (25775) | - | 78.6     | - | 49.5  | - |
| Spanish–Italian    | 47.0 (10709) | - | 27.8 (23528) | - | 78.3     | - | 53.7  | - |
| Spanish–Portuguese | 57.4 (9732)  | - | 35.6 (23197) | - | 82.3     | - | 56.3  | - |

Table 5: Full results for the standard BLI task and controlled for lexeme BLI for the model of (Artetxe et al., 2016) (with ✓an without ✗an enforced morphological constraint).

| Constraint         | Normal       |      |              |      | Lexeme   |      |       |      |
|--------------------|--------------|------|--------------|------|----------|------|-------|------|
|                    | In vocab     |      | +OOVs        |      | In vocab |      | +OOVs |      |
|                    | ✗            | ✓    | ✗            | ✓    | ✗        | ✓    | ✗     | ✓    |
| Czech–Polish       | 51.7 (3161)  | 55.1 | 42.9 (4166)  | 46.1 | 84.2     | 85.2 | 78.1  | 79.4 |
| Czech–Russian      | 44.9 (3562)  | 49.6 | 38.2 (4762)  | 42.5 | 84.8     | 87.3 | 81.1  | 83.8 |
| Czech–Slovak       | 60.8 (802)   | 60.8 | 54.2 (1027)  | 52.4 | 89.5     | 89.7 | 87.1  | 87.3 |
| Czech–Ukrainian    | 48.1 (673)   | 50.2 | 39.8 (854)   | 41.8 | 82.9     | 83.5 | 79.4  | 79.5 |
| Polish–Czech       | 41.8 (4043)  | 43.6 | 34.6 (5332)  | 36.2 | 80.8     | 81.1 | 75.7  | 76.2 |
| Polish–Russian     | 47.1 (6814)  | 49.8 | 40.4 (9079)  | 43.1 | 83.7     | 84.7 | 80.5  | 82.0 |
| Polish–Slovak      | 33.0 (1217)  | 35.2 | 26.3 (1689)  | 27.5 | 78.1     | 78.5 | 75.7  | 76.1 |
| Polish–Ukrainian   | 34.8 (1118)  | 36.4 | 29.6 (1463)  | 30.6 | 74.2     | 74.9 | 70.5  | 71.8 |
| Russian–Czech      | 32.1 (5708)  | 33.4 | 26.4 (7538)  | 27.6 | 76.8     | 78.6 | 73.1  | 75.2 |
| Russian–Polish     | 40.0 (9183)  | 40.7 | 35.0 (11697) | 35.7 | 81.2     | 82.2 | 78.6  | 80.4 |
| Russian–Slovak     | 24.0 (1610)  | 20.8 | 20.0 (2150)  | 17.0 | 78.3     | 77.5 | 74.7  | 75.1 |
| Russian–Ukrainian  | 48.6 (1165)  | 49.1 | 44.4 (1396)  | 44.6 | 82.8     | 83.9 | 81.9  | 82.8 |
| Slovak–Czech       | 58.7 (858)   | 62.9 | 49.6 (1154)  | 52.4 | 91.6     | 92.4 | 89.6  | 90.0 |
| Slovak–Polish      | 38.3 (830)   | 45.9 | 30.8 (1094)  | 37.8 | 80.5     | 81.6 | 79.2  | 80.7 |
| Slovak–Russian     | 23.3 (814)   | 31.6 | 18.4 (1140)  | 24.6 | 82.6     | 84.2 | 80.7  | 83.2 |
| Slovak–Ukrainian   | 43.6 (330)   | 55.5 | 36.7 (425)   | 47.1 | 82.4     | 85.5 | 81.4  | 84.2 |
| Ukrainian–Czech    | 43.3 (699)   | 49.6 | 38.6 (869)   | 43.6 | 79.0     | 81.4 | 75.4  | 76.8 |
| Ukrainian–Polish   | 54.5 (850)   | 59.3 | 47.2 (1054)  | 52.1 | 82.6     | 83.8 | 79.4  | 80.6 |
| Ukrainian–Russian  | 69.6 (786)   | 72.0 | 65.6 (933)   | 67.8 | 91.1     | 91.7 | 89.5  | 90.7 |
| Ukrainian–Slovak   | 33.5 (322)   | 45.0 | 28.3 (420)   | 36.9 | 81.4     | 83.5 | 79.0  | 82.1 |
| Catalan–French     | 55.0 (5605)  | 58.9 | 31.4 (11367) | 36.0 | 78.6     | 82.5 | 48.9  | 55.5 |
| Catalan–Italian    | 52.2 (5518)  | 55.8 | 29.0 (11970) | 32.7 | 80.0     | 83.4 | 49.5  | 55.1 |
| Catalan–Portuguese | 62.4 (5418)  | 64.8 | 40.6 (10759) | 43.9 | 82.8     | 84.6 | 57.4  | 61.0 |
| Catalan–Spanish    | 67.2 (5879)  | 70.5 | 43.2 (12282) | 46.8 | 83.4     | 86.7 | 57.2  | 61.6 |
| French–Catalan     | 39.7 (7845)  | 42.1 | 22.6 (16992) | 25.3 | 75.2     | 79.1 | 47.4  | 54.3 |
| French–Italian     | 48.0 (9891)  | 50.0 | 26.8 (22052) | 29.3 | 80.0     | 83.1 | 51.1  | 57.1 |
| French–Portuguese  | 47.0 (8930)  | 49.5 | 29.5 (17536) | 32.4 | 76.8     | 80.8 | 53.2  | 59.1 |
| French–Spanish     | 48.4 (9770)  | 50.1 | 27.1 (21087) | 30.8 | 79.3     | 82.2 | 49.3  | 57.1 |
| Italian–Catalan    | 35.2 (9035)  | 36.3 | 17.8 (22636) | 18.9 | 73.1     | 76.8 | 45.1  | 51.1 |
| Italian–French     | 40.0 (12595) | 41.7 | 20.8 (31419) | 22.4 | 76.2     | 79.3 | 49.4  | 54.7 |
| Italian–Portuguese | 42.3 (10072) | 43.1 | 20.5 (25704) | 21.1 | 76.7     | 78.3 | 47.0  | 50.2 |
| Italian–Spanish    | 42.6 (11685) | 44.1 | 21.0 (30686) | 23.5 | 76.2     | 78.7 | 47.6  | 53.7 |
| Portuguese–Catalan | 48.1 (7199)  | 49.7 | 28.1 (16059) | 29.1 | 78.4     | 80.4 | 51.0  | 53.2 |
| Portuguese–French  | 47.1 (9664)  | 50.1 | 25.9 (22437) | 28.6 | 77.7     | 80.7 | 48.2  | 52.3 |
| Portuguese–Italian | 45.8 (8939)  | 48.0 | 24.8 (20757) | 26.8 | 77.5     | 80.0 | 48.9  | 53.2 |
| Portuguese–Spanish | 60.2 (9275)  | 61.4 | 37.4 (22638) | 38.5 | 84.7     | 85.7 | 57.9  | 59.6 |
| Spanish–Catalan    | 49.2 (8291)  | 49.8 | 29.3 (18442) | 30.6 | 76.5     | 78.6 | 50.5  | 53.5 |
| Spanish–French     | 45.4 (11457) | 47.6 | 24.1 (25775) | 26.9 | 74.6     | 78.1 | 44.5  | 50.2 |
| Spanish–Italian    | 46.4 (10709) | 47.8 | 26.9 (23528) | 28.6 | 75.9     | 78.8 | 50.4  | 54.9 |
| Spanish–Portuguese | 57.0 (9732)  | 58.0 | 35.1 (23197) | 36.3 | 81.3     | 82.0 | 55.0  | 57.0 |

Table 6: Full results for the standard BLI task and controlled for lexeme BLI for the model of (Artetxe et al., 2017) (with ✓an without ✗an enforced morphological constraint).

| Constraint         | Normal       |      |              |      | Lexeme   |      |       |      |
|--------------------|--------------|------|--------------|------|----------|------|-------|------|
|                    | In vocab     |      | +OOVs        |      | In vocab |      | +OOVs |      |
|                    | ✗            | ✓    | ✗            | ✓    | ✗        | ✓    | ✗     | ✓    |
| Czech–Polish       | 51.8 (3161)  | 54.9 | 42.8 (4166)  | 45.8 | 84.0     | 85.1 | 77.7  | 78.7 |
| Czech–Russian      | 45.5 (3562)  | 45.4 | 38.6 (4762)  | 38.1 | 85.0     | 85.5 | 80.8  | 81.2 |
| Czech–Slovak       | 61.5 (802)   | 59.2 | 54.0 (1027)  | 52.4 | 89.9     | 89.2 | 87.3  | 86.9 |
| Czech–Ukrainian    | 48.4 (673)   | 52.9 | 39.9 (854)   | 44.3 | 83.5     | 83.1 | 80.0  | 80.1 |
| Polish–Czech       | 42.0 (4043)  | 44.4 | 34.8 (5332)  | 36.7 | 80.6     | 81.1 | 75.3  | 75.9 |
| Polish–Russian     | 47.4 (6814)  | 47.3 | 40.3 (9079)  | 40.3 | 83.6     | 84.2 | 80.2  | 81.2 |
| Polish–Slovak      | 35.8 (1217)  | 33.6 | 28.5 (1689)  | 26.4 | 80.3     | 77.8 | 77.5  | 75.7 |
| Polish–Ukrainian   | 35.8 (1118)  | 35.0 | 30.5 (1463)  | 30.2 | 75.1     | 75.7 | 71.7  | 72.4 |
| Russian–Czech      | 33.1 (5708)  | 34.0 | 27.2 (7538)  | 28.0 | 77.3     | 78.5 | 73.1  | 74.3 |
| Russian–Polish     | 39.8 (9183)  | 41.2 | 34.8 (11697) | 36.1 | 80.8     | 82.6 | 77.7  | 80.2 |
| Russian–Slovak     | 25.7 (1610)  | 21.1 | 20.9 (2150)  | 17.0 | 79.3     | 76.8 | 76.0  | 74.2 |
| Russian–Ukrainian  | 47.9 (1165)  | 45.5 | 43.8 (1396)  | 41.6 | 83.3     | 82.5 | 82.1  | 82.2 |
| Slovak–Czech       | 58.0 (858)   | 53.3 | 49.2 (1154)  | 43.5 | 91.1     | 91.3 | 89.3  | 89.3 |
| Slovak–Polish      | 40.4 (830)   | 32.5 | 32.7 (1094)  | 25.7 | 81.4     | 79.8 | 79.4  | 78.2 |
| Slovak–Russian     | 25.3 (814)   | 12.0 | 20.0 (1140)  | 9.6  | 83.5     | 81.1 | 81.7  | 80.0 |
| Slovak–Ukrainian   | 45.5 (330)   | 49.4 | 38.1 (425)   | 41.9 | 84.2     | 85.2 | 82.4  | 83.3 |
| Ukrainian–Czech    | 44.2 (699)   | 41.9 | 38.9 (869)   | 36.1 | 78.7     | 80.7 | 74.5  | 76.8 |
| Ukrainian–Polish   | 54.6 (850)   | 50.6 | 47.2 (1054)  | 43.0 | 83.2     | 82.7 | 79.5  | 78.5 |
| Ukrainian–Russian  | 68.4 (786)   | 61.1 | 63.7 (933)   | 56.1 | 89.9     | 89.1 | 88.6  | 87.6 |
| Ukrainian–Slovak   | 39.1 (322)   | 44.4 | 31.7 (420)   | 35.7 | 82.0     | 82.0 | 80.2  | 81.9 |
| Catalan–French     | 55.9 (5605)  | 58.4 | 32.0 (11367) | 34.6 | 79.4     | 81.9 | 49.2  | 52.9 |
| Catalan–Italian    | 53.0 (5518)  | 54.3 | 29.3 (11970) | 30.7 | 80.1     | 81.8 | 49.2  | 51.5 |
| Catalan–Portuguese | 62.8 (5418)  | 64.2 | 41.1 (10759) | 42.4 | 83.1     | 84.3 | 57.7  | 59.0 |
| Catalan–Spanish    | 68.0 (5879)  | 68.6 | 43.3 (12282) | 44.3 | 84.2     | 84.7 | 57.4  | 58.8 |
| French–Catalan     | 40.3 (7845)  | 42.7 | 22.4 (16992) | 25.3 | 74.6     | 78.1 | 45.9  | 51.4 |
| French–Italian     | 48.3 (9891)  | 49.8 | 26.8 (22052) | 28.1 | 79.9     | 81.5 | 50.9  | 53.4 |
| French–Portuguese  | 47.4 (8930)  | 50.3 | 29.7 (17536) | 32.1 | 76.9     | 80.0 | 52.5  | 56.6 |
| French–Spanish     | 47.8 (9770)  | 50.2 | 26.7 (21087) | 28.9 | 78.0     | 81.4 | 47.9  | 52.2 |
| Italian–Catalan    | 35.5 (9035)  | 37.2 | 17.8 (22636) | 19.1 | 73.5     | 75.6 | 45.0  | 47.8 |
| Italian–French     | 40.5 (12595) | 41.4 | 21.0 (31419) | 21.6 | 76.8     | 77.7 | 49.8  | 51.7 |
| Italian–Portuguese | 42.6 (10072) | 43.6 | 20.4 (25704) | 21.3 | 76.7     | 77.8 | 46.6  | 48.6 |
| Italian–Spanish    | 42.7 (11685) | 43.8 | 21.1 (30686) | 22.1 | 76.4     | 77.6 | 47.6  | 49.6 |
| Portuguese–Catalan | 47.8 (7199)  | 49.9 | 27.6 (16059) | 29.0 | 77.6     | 80.2 | 49.9  | 52.5 |
| Portuguese–French  | 47.1 (9664)  | 49.4 | 25.6 (22437) | 27.7 | 77.4     | 80.0 | 47.2  | 50.7 |
| Portuguese–Italian | 46.4 (8939)  | 47.6 | 24.8 (20757) | 25.9 | 77.8     | 78.8 | 49.0  | 50.6 |
| Portuguese–Spanish | 60.2 (9275)  | 61.1 | 36.8 (22638) | 37.6 | 84.7     | 85.4 | 57.1  | 58.2 |
| Spanish–Catalan    | 49.4 (8291)  | 50.3 | 29.8 (18442) | 30.7 | 76.8     | 78.2 | 51.2  | 52.8 |
| Spanish–French     | 45.5 (11457) | 47.3 | 24.2 (25775) | 25.7 | 74.1     | 77.1 | 44.2  | 47.0 |
| Spanish–Italian    | 46.6 (10709) | 47.3 | 27.1 (23528) | 27.8 | 76.2     | 77.0 | 50.7  | 51.8 |
| Spanish–Portuguese | 57.3 (9732)  | 57.9 | 35.4 (23197) | 35.7 | 81.5     | 81.8 | 55.1  | 55.7 |

Table 7: Full results for the standard BLI task and controlled for lexeme BLI for the model of (Ruder et al., 2018) (with ✓an without ✗an enforced morphological constraint).

| Czech–Polish         |                   |               |                   |               |
|----------------------|-------------------|---------------|-------------------|---------------|
| Morph                | Normal (In vocab) | Normal (+OOV) | Lexeme (In vocab) | Lexeme (+OOV) |
| ALL                  | 49.32 (3161)      | 40.85 (4166)  | 84.5              | 78.2          |
| ACC;ADJ;NEUT;SG      | 50.00 (68)        | 47.89 (71)    | 92.65             | 91.55         |
| ADJ;GEN;PL           | 52.38 (63)        | 47.89 (71)    | 98.41             | 98.59         |
| ADJ;GEN;MASC;SG      | 43.08 (65)        | 40.85 (71)    | 98.46             | 98.59         |
| ADJ;ESS;MASC;SG      | 50.00 (56)        | 40.85 (71)    | 85.71             | 84.51         |
| ADJ;FEM;INS;SG       | 16.67 (6)         | 16.67 (6)     | 66.67             | 66.67         |
| ADJ;NOM;PL           | 16.67 (6)         | 16.67 (6)     | 66.67             | 66.67         |
| ACC;ADJ;FEM;SG       | 52.24 (67)        | 50.70 (71)    | 95.52             | 95.77         |
| ADJ;INS;NEUT;SG      | 20.00 (5)         | 16.67 (6)     | 100               | 100           |
| ADJ;DAT;FEM;SG       | 50.00 (68)        | 47.89 (71)    | 92.65             | 91.55         |
| ADJ;DAT;MASC;SG      | 65.85 (41)        | 46.48 (71)    | 100               | 100           |
| ADJ;DAT;PL           | 41.54 (65)        | 39.44 (71)    | 98.46             | 98.59         |
| ADJ;ESS;FEM;SG       | 50.00 (68)        | 47.89 (71)    | 92.65             | 91.55         |
| ADJ;INS;MASC;SG      | 41.54 (65)        | 39.44 (71)    | 98.46             | 98.59         |
| ADJ;ESS;NEUT;SG      | 47.37 (57)        | 38.03 (71)    | 94.74             | 91.55         |
| ADJ;INS;PL           | 52.73 (55)        | 45.07 (71)    | 100               | 100           |
| ACC;ADJ;PL           | 16.67 (6)         | 16.67 (6)     | 66.67             | 66.67         |
| ADJ;ESS;PL           | 52.38 (63)        | 47.89 (71)    | 98.41             | 98.59         |
| ADJ;FEM;GEN;SG       | 50.00 (68)        | 47.89 (71)    | 92.65             | 91.55         |
| ACC;ADJ;MASC;SG      | 43.08 (65)        | 40.85 (71)    | 98.46             | 98.59         |
| ADJ;GEN;NEUT;SG      | 43.08 (65)        | 40.85 (71)    | 98.46             | 98.59         |
| ADJ;DAT;NEUT;SG      | 65.85 (41)        | 46.48 (71)    | 100               | 100           |
| GEN;N;SG             | 54.26 (352)       | 54.37 (355)   | 85.8              | 84.79         |
| ACC;N;PL             | 55.15 (330)       | 53.49 (344)   | 88.48             | 87.5          |
| INS;N;PL             | 58.94 (263)       | 46.82 (346)   | 95.44             | 93.06         |
| DAT;N;SG             | 47.62 (273)       | 43.06 (353)   | 72.89             | 68.56         |
| N;NOM;PL             | 54.35 (333)       | 52.74 (347)   | 88.59             | 86.74         |
| ESS;N;PL             | 60.70 (229)       | 46.67 (345)   | 92.14             | 93.33         |
| N;SG;VOC             | 52.87 (157)       | 35.88 (354)   | 72.61             | 54.8          |
| N;PL;VOC             | 54.22 (332)       | 52.45 (347)   | 88.55             | 86.46         |
| ACC;N;SG             | 50.43 (347)       | 49.30 (355)   | 76.95             | 75.77         |
| INS;N;SG             | 49.23 (325)       | 45.89 (353)   | 86.15             | 85.55         |
| GEN;N;PL             | 53.55 (310)       | 49.43 (348)   | 80                | 75            |
| ESS;N;SG             | 47.44 (312)       | 43.34 (353)   | 72.12             | 68.84         |
| N;NOM;SG             | 49.58 (355)       | 49.58 (355)   | 77.75             | 77.75         |
| DAT;N;PL             | 49.08 (163)       | 35.84 (346)   | 90.8              | 90.17         |
| ADJ;FEM;NOM;SG       | 48.39 (62)        | 47.69 (65)    | 93.55             | 93.85         |
| ADJ;MASC;NOM;SG      | 58.06 (62)        | 56.92 (65)    | 95.16             | 96.92         |
| ACC;ADJ;INAN;MASC;SG | 58.06 (62)        | 56.92 (65)    | 95.16             | 96.92         |
| ACC;ADJ;MASC;PL      | 53.23 (62)        | 50.77 (65)    | 95.16             | 93.85         |
| ADJ;MASC;NOM;PL      | 36.11 (36)        | 33.85 (65)    | 72.22             | 63.08         |
| ADJ;NEUT;NOM;SG      | 53.23 (62)        | 50.77 (65)    | 95.16             | 93.85         |
| 3;MASC;PST;SG;V      | 52.63 (38)        | 48.78 (41)    | 89.47             | 85.37         |
| 2;IMP;PL;V           | 12.50 (8)         | 7.50 (40)     | 37.5              | 25            |
| 1;PRS;SG;V           | 46.15 (13)        | 20.59 (34)    | 69.23             | 32.35         |
| 3;FEM;PL;PST;V       | 55.56 (27)        | 43.90 (41)    | 92.59             | 85.37         |
| 1;PL;PRS;V           | 35.71 (14)        | 14.71 (34)    | 71.43             | 50            |
| 3;PL;PRS;V           | 46.43 (28)        | 41.18 (34)    | 92.86             | 79.41         |
| 3;MASC;PL;PST;V      | 38.71 (31)        | 31.71 (41)    | 90.32             | 82.93         |
| 3;NEUT;PST;SG;V      | 55.56 (27)        | 43.90 (41)    | 96.3              | 95.12         |
| NFIN;V               | 33.33 (45)        | 32.61 (46)    | 100               | 95.65         |
| 2;PL;PRS;V           | 0.00 (5)          | 0.00 (34)     | 0                 | 0             |
| 3;PRS;SG;V           | 46.88 (32)        | 44.12 (34)    | 75                | 64.71         |
| 3;FEM;PST;SG;V       | 51.52 (33)        | 48.78 (41)    | 93.94             | 90.24         |
| 2;PRS;SG;V           | 14.29 (7)         | 5.88 (34)     | 42.86             | 20.59         |
| 2;IMP;SG;V           | 15.38 (13)        | 10.00 (40)    | 23.08             | 20            |
| 1;IMP;PL;V           | 33.33 (3)         | 5.00 (40)     | 66.67             | 17.5          |
| 2;FUT;PL;V           | 0.00 (1)          | 0.00 (9)      | 0                 | 0             |
| 1;FUT;SG;V           | 0.00 (5)          | 0.00 (9)      | 20                | 11.11         |
| 3;FUT;PL;V           | 14.29 (7)         | 11.11 (9)     | 28.57             | 33.33         |
| 1;FUT;PL;V           | 0.00 (3)          | 11.11 (9)     | 66.67             | 66.67         |
| 2;FUT;SG;V           | 0.00 (1)          | 11.11 (9)     | 100               | 33.33         |
| 3;FUT;SG;V           | 11.11 (9)         | 11.11 (9)     | 33.33             | 33.33         |

Table 8: The performance of Artetxe et al. (2016)’s model on translating words belonging to a specific morphological category for the Czech–Polish language pair (the grey numbers correspond to the dictionary sizes).

| Czech–Russian        |                   |               |                   |               |
|----------------------|-------------------|---------------|-------------------|---------------|
| Morph                | Normal (In vocab) | Normal (+OOV) | Lexeme (In vocab) | Lexeme (+OOV) |
| ALL                  | 44.47 (3562)      | 37.32 (4762)  | 87.11             | 82.89         |
| GEN;N;PL             | 40.38 (312)       | 36.71 (365)   | 78.53             | 73.97         |
| GEN;N;SG             | 47.40 (365)       | 46.65 (373)   | 84.66             | 83.65         |
| DAT;N;PL             | 52.41 (187)       | 39.73 (365)   | 96.26             | 94.79         |
| INS;N;SG             | 51.85 (324)       | 47.72 (373)   | 88.89             | 86.86         |
| ACC;N;PL             | 45.78 (225)       | 43.55 (248)   | 81.33             | 78.63         |
| N;NOM;PL             | 48.06 (335)       | 45.30 (362)   | 86.87             | 83.43         |
| N;NOM;SG             | 44.69 (367)       | 43.94 (371)   | 79.56             | 79.25         |
| DAT;N;SG             | 43.73 (311)       | 38.87 (373)   | 77.49             | 73.46         |
| ESS;N;SG             | 43.59 (312)       | 38.61 (373)   | 77.56             | 72.92         |
| INS;N;PL             | 45.70 (256)       | 37.53 (365)   | 86.72             | 85.48         |
| ESS;N;PL             | 46.15 (208)       | 37.81 (365)   | 94.23             | 94.52         |
| ACC;N;SG             | 44.78 (364)       | 43.43 (373)   | 80.49             | 79.36         |
| ADJ;DAT;MASC;SG      | 61.40 (57)        | 50.60 (83)    | 98.25             | 98.8          |
| ADJ;NEUT;NOM;SG      | 59.15 (71)        | 55.41 (74)    | 88.73             | 86.49         |
| ADJ;FEM;GEN;SG       | 55.56 (81)        | 53.01 (83)    | 86.42             | 84.34         |
| ACC;ADJ;INAN;MASC;SG | 56.94 (72)        | 55.41 (74)    | 95.83             | 94.59         |
| ADJ;INS;PL           | 65.22 (69)        | 59.04 (83)    | 100               | 100           |
| ADJ;ESS;PL           | 63.64 (77)        | 60.24 (83)    | 98.7              | 98.8          |
| ADJ;FEM;NOM;SG       | 59.72 (72)        | 58.11 (74)    | 97.22             | 97.3          |
| ADJ;DAT;PL           | 62.34 (77)        | 59.04 (83)    | 100               | 100           |
| ADJ;ESS;FEM;SG       | 55.56 (81)        | 53.01 (83)    | 86.42             | 84.34         |
| ADJ;DAT;NEUT;SG      | 61.40 (57)        | 50.60 (83)    | 98.25             | 98.8          |
| ADJ;GEN;PL           | 63.64 (77)        | 60.24 (83)    | 98.7              | 98.8          |
| ADJ;MASC;NOM;SG      | 56.94 (72)        | 55.41 (74)    | 95.83             | 94.59         |
| ADJ;GEN;MASC;SG      | 59.49 (79)        | 56.63 (83)    | 100               | 100           |
| ACC;ADJ;NEUT;SG      | 56.25 (80)        | 53.01 (83)    | 86.25             | 84.34         |
| ACC;ADJ;MASC;SG      | 59.49 (79)        | 56.63 (83)    | 100               | 100           |
| ADJ;GEN;NEUT;SG      | 59.49 (79)        | 56.63 (83)    | 100               | 100           |
| ADJ;DAT;FEM;SG       | 55.56 (81)        | 53.01 (83)    | 86.42             | 84.34         |
| ADJ;INS;MASC;SG      | 62.34 (77)        | 59.04 (83)    | 100               | 100           |
| ACC;ADJ;FEM;SG       | 62.50 (80)        | 60.24 (83)    | 96.25             | 96.39         |
| ADJ;ESS;MASC;SG      | 54.93 (71)        | 51.81 (83)    | 98.59             | 98.8          |
| ADJ;ESS;NEUT;SG      | 58.33 (72)        | 54.22 (83)    | 100               | 100           |
| 3;PRS;SG;V           | 29.63 (54)        | 28.57 (56)    | 90.74             | 87.5          |
| 2;PRS;SG;V           | 0.00 (7)          | 14.29 (56)    | 57.14             | 55.36         |
| 2;IMP;PL;V           | 5.88 (17)         | 7.79 (77)     | 88.24             | 71.43         |
| 1;PRS;SG;V           | 7.69 (13)         | 12.50 (56)    | 53.85             | 37.5          |
| 3;FEM;PST;SG;V       | 26.23 (61)        | 22.50 (80)    | 98.36             | 95            |
| 1;PL;PRS;V           | 7.14 (14)         | 8.93 (56)     | 78.57             | 71.43         |
| 3;NEUT;PST;SG;V      | 23.81 (42)        | 22.50 (80)    | 92.86             | 93.75         |
| 2;PL;PRS;V           | 27.27 (11)        | 16.07 (56)    | 63.64             | 73.21         |
| 3;MASC;PST;SG;V      | 28.57 (70)        | 26.25 (80)    | 91.43             | 86.25         |
| 3;PL;PRS;V           | 40.00 (40)        | 28.57 (56)    | 92.5              | 71.43         |
| NFIN;V               | 26.92 (104)       | 24.14 (116)   | 99.04             | 99.14         |
| 3;MASC;PL;PST;V      | 25.00 (60)        | 23.75 (80)    | 98.33             | 96.25         |
| 2;IMP;SG;V           | 6.67 (15)         | 6.49 (77)     | 33.33             | 20.78         |
| 3;FEM;PL;PST;V       | 17.86 (56)        | 15.00 (80)    | 91.07             | 81.25         |
| ADJ;FEM;INS;SG       | 33.33 (9)         | 33.33 (9)     | 66.67             | 66.67         |
| ADJ;NOM;PL           | 33.33 (9)         | 33.33 (9)     | 66.67             | 66.67         |
| ADJ;INS;NEUT;SG      | 44.44 (9)         | 44.44 (9)     | 100               | 100           |
| ACC;ADJ;PL           | 33.33 (9)         | 33.33 (9)     | 66.67             | 66.67         |
| 1;FUT;PL;V           | 0.00 (6)          | 0.00 (26)     | 50                | 42.31         |
| 3;FUT;SG;V           | 14.29 (21)        | 11.54 (26)    | 76.19             | 65.38         |
| 2;FUT;PL;V           | 0.00 (7)          | 0.00 (26)     | 100               | 57.69         |
| 1;FUT;SG;V           | 0.00 (7)          | 0.00 (25)     | 14.29             | 8             |
| 2;FUT;SG;V           | 0.00 (2)          | 0.00 (26)     | 0                 | 34.62         |
| 3;FUT;PL;V           | 15.79 (19)        | 11.54 (26)    | 73.68             | 65.38         |
| ACC;INAN;N;SG        | 0.00 (2)          | 0.00 (2)      | 0                 | 0             |
| ACC;INAN;N;PL        | 0.00 (2)          | 0.00 (2)      | 50                | 50            |

Table 9: The performance of [Artetxe et al. \(2016\)](#)’s model on translating words belonging to a specific morphological category for the Czech–Russian language pair (the grey numbers correspond to the dictionary sizes).

| Czech–Slovak         |                   |               |                   |               |
|----------------------|-------------------|---------------|-------------------|---------------|
| Morph                | Normal (In vocab) | Normal (+OOV) | Lexeme (In vocab) | Lexeme (+OOV) |
| ALL                  | 53.12 (802)       | 45.47 (1027)  | 90.90             | 88.7          |
| ADJ;INS;MASC;SG      | 60.00 (10)        | 63.64 (11)    | 100.00            | 100           |
| ADJ;ESS;PL           | 63.64 (11)        | 63.64 (11)    | 100.00            | 100           |
| ADJ;DAT;NEUT;SG      | 62.50 (8)         | 63.64 (11)    | 100.00            | 100           |
| ADJ;ESS;FEM;SG       | 63.64 (11)        | 63.64 (11)    | 90.91             | 90.91         |
| ACC;ADJ;MASC;PL      | 63.64 (11)        | 63.64 (11)    | 90.91             | 90.91         |
| ADJ;MASC;NOM;SG      | 54.55 (11)        | 54.55 (11)    | 100.00            | 100           |
| ADJ;ESS;MASC;SG      | 62.50 (8)         | 54.55 (11)    | 87.50             | 81.82         |
| ADJ;GEN;NEUT;SG      | 72.73 (11)        | 72.73 (11)    | 100.00            | 100           |
| ADJ;DAT;PL           | 60.00 (10)        | 63.64 (11)    | 100.00            | 100           |
| ADJ;MASC;NOM;PL      | 57.14 (7)         | 45.45 (11)    | 100.00            | 81.82         |
| ACC;ADJ;INAN;MASC;SG | 54.55 (11)        | 54.55 (11)    | 100.00            | 100           |
| ADJ;GEN;MASC;SG      | 72.73 (11)        | 72.73 (11)    | 100.00            | 100           |
| ACC;ADJ;MASC;SG      | 72.73 (11)        | 72.73 (11)    | 100.00            | 100           |
| ACC;ADJ;NEUT;SG      | 63.64 (11)        | 63.64 (11)    | 90.91             | 90.91         |
| ADJ;ESS;NEUT;SG      | 75.00 (8)         | 72.73 (11)    | 100.00            | 100           |
| ADJ;NEUT;NOM;SG      | 63.64 (11)        | 63.64 (11)    | 90.91             | 90.91         |
| ADJ;INS;PL           | 75.00 (8)         | 72.73 (11)    | 100.00            | 100           |
| ADJ;GEN;PL           | 63.64 (11)        | 63.64 (11)    | 100.00            | 100           |
| ADJ;FEM;NOM;SG       | 63.64 (11)        | 63.64 (11)    | 100.00            | 100           |
| ADJ;DAT;MASC;SG      | 62.50 (8)         | 63.64 (11)    | 100.00            | 100           |
| ADJ;FEM;GEN;SG       | 63.64 (11)        | 63.64 (11)    | 90.91             | 90.91         |
| ADJ;DAT;FEM;SG       | 63.64 (11)        | 63.64 (11)    | 90.91             | 90.91         |
| ACC;ADJ;FEM;SG       | 63.64 (11)        | 63.64 (11)    | 100.00            | 90.91         |
| GEN;N;SG             | 52.58 (97)        | 51.49 (101)   | 87.63             | 89.11         |
| N;NOM;PL             | 54.35 (92)        | 53.85 (104)   | 88.04             | 86.54         |
| INS;N;SG             | 59.52 (84)        | 49.50 (101)   | 91.67             | 90.1          |
| N;NOM;SG             | 53.54 (99)        | 52.48 (101)   | 88.89             | 88.12         |
| ACC;N;SG             | 50.53 (95)        | 49.50 (101)   | 90.53             | 90.1          |
| ACC;N;PL             | 52.13 (94)        | 52.88 (104)   | 84.04             | 86.54         |
| DAT;N;SG             | 52.78 (72)        | 43.56 (101)   | 81.94             | 76.24         |
| INS;N;PL             | 55.00 (60)        | 40.78 (103)   | 96.67             | 93.2          |
| DAT;N;PL             | 37.25 (51)        | 29.13 (103)   | 88.24             | 89.32         |
| ESS;N;SG             | 54.67 (75)        | 44.55 (101)   | 85.33             | 78.22         |
| ESS;N;PL             | 52.73 (55)        | 37.86 (103)   | 98.18             | 97.09         |
| GEN;N;PL             | 46.51 (86)        | 41.35 (104)   | 83.72             | 77.88         |
| NFIN;V               | 58.33 (84)        | 53.68 (95)    | 100.00            | 100           |
| 3;FEM;PL;PST;V       | 0.00 (1)          | 0.00 (1)      | 100.00            | 100           |
| 1;PRS;SG;V           | -                 | 0.00 (1)      | -                 | 100           |
| 3;MASC;PL;PST;V      | 0.00 (1)          | 0.00 (1)      | 100.00            | 100           |
| 3;NEUT;PST;SG;V      | 0.00 (1)          | 0.00 (1)      | 100.00            | 100           |
| 3;MASC;PST;SG;V      | 0.00 (1)          | 0.00 (1)      | 100.00            | 100           |
| 1;PL;PRS;V           | 100.00 (1)        | 100.00 (1)    | 100.00            | 100           |
| 1;IMP;PL;V           | -                 | 0.00 (1)      | -                 | 0             |
| 3;FEM;PST;SG;V       | 0.00 (1)          | 0.00 (1)      | 100.00            | 100           |
| 2;IMP;PL;V           | -                 | 0.00 (1)      | -                 | 100           |
| 3;PRS;SG;V           | 100.00 (1)        | 100.00 (1)    | 100.00            | 100           |
| 2;IMP;SG;V           | -                 | 0.00 (1)      | -                 | 0             |
| 2;PL;PRS;V           | -                 | 0.00 (1)      | -                 | 0             |
| 2;PRS;SG;V           | -                 | 0.00 (1)      | -                 | 0             |
| 3;NEUT;PL;PST;V      | 0.00 (1)          | 0.00 (1)      | 100.00            | 100           |
| 3;PL;PRS;V           | 0.00 (1)          | 0.00 (1)      | 0.00              | 0             |

Table 10: The performance of Artetxe et al. (2016)’s model on translating words belonging to a specific morphological category for the Czech–Slovak language pair (the grey numbers correspond to the dictionary sizes).



| Czech–Ukrainian      |                   |               |                   |               |
|----------------------|-------------------|---------------|-------------------|---------------|
| Morph                | Normal (In vocab) | Normal (+OOV) | Lexeme (In vocab) | Lexeme (+OOV) |
| ALL                  | 32.39 (673)       | 26.70 (854)   | 84.1              | 80.21         |
| ACC;N;SG             | 34.44 (90)        | 32.63 (95)    | 78.89             | 77.89         |
| N;PL;VOC             | 33.71 (89)        | 31.91 (94)    | 84.27             | 81.91         |
| N;SG;VOC             | 20.00 (35)        | 10.64 (94)    | 68.57             | 47.87         |
| DAT;N;PL             | 36.84 (57)        | 27.66 (94)    | 96.49             | 96.81         |
| N;NOM;SG             | 32.98 (94)        | 32.63 (95)    | 81.91             | 81.05         |
| INS;N;SG             | 42.17 (83)        | 36.84 (95)    | 91.57             | 90.53         |
| ACC;N;PL             | 34.44 (90)        | 32.98 (94)    | 83.33             | 82.98         |
| INS;N;PL             | 32.89 (76)        | 26.60 (94)    | 92.11             | 90.43         |
| GEN;N;SG             | 29.67 (91)        | 28.42 (95)    | 81.32             | 80            |
| GEN;N;PL             | 32.94 (85)        | 31.58 (95)    | 84.71             | 82.11         |
| N;NOM;PL             | 33.33 (90)        | 31.91 (94)    | 83.33             | 81.91         |
| ESS;N;SG             | 28.05 (82)        | 24.21 (95)    | 73.17             | 65.26         |
| DAT;N;SG             | 26.25 (80)        | 23.16 (95)    | 72.5              | 65.26         |
| ESS;N;PL             | 36.67 (60)        | 24.47 (94)    | 91.67             | 94.68         |
| 3;PL;PRS;V           | 0.00 (2)          | 0.00 (3)      | 50                | 33.33         |
| 3;PRS;SG;V           | 33.33 (3)         | 33.33 (3)     | 66.67             | 66.67         |
| 1;PRS;SG;V           | 50.00 (2)         | 33.33 (3)     | 100               | 66.67         |
| 3;NEUT;PST;SG;V      | 0.00 (2)          | 0.00 (3)      | 100               | 100           |
| 3;FEM;PST;SG;V       | 33.33 (3)         | 33.33 (3)     | 100               | 100           |
| 3;FEM;PL;PST;V       | 0.00 (3)          | 0.00 (3)      | 66.67             | 66.67         |
| NFIN;V               | 66.67 (3)         | 66.67 (3)     | 100               | 100           |
| 3;MASC;PL;PST;V      | 0.00 (3)          | 0.00 (3)      | 66.67             | 66.67         |
| 2;IMP;SG;V           | 0.00 (3)          | 0.00 (3)      | 33.33             | 33.33         |
| 2;PL;PRS;V           | 0.00 (2)          | 0.00 (3)      | 100               | 66.67         |
| 2;PRS;SG;V           | 0.00 (2)          | 0.00 (3)      | 50                | 33.33         |
| 2;IMP;PL;V           | 0.00 (3)          | 0.00 (3)      | 100               | 100           |
| 1;PL;PRS;V           | 50.00 (2)         | 33.33 (3)     | 100               | 100           |
| 1;IMP;PL;V           | 0.00 (1)          | 0.00 (3)      | 0                 | 0             |
| 3;MASC;PST;SG;V      | 50.00 (2)         | 50.00 (2)     | 100               | 100           |
| ADJ;FEM;GEN;SG       | 0.00 (1)          | 0.00 (1)      | 100               | 100           |
| ADJ;GEN;NEUT;SG      | 0.00 (1)          | 0.00 (1)      | 100               | 100           |
| ADJ;DAT;PL           | 0.00 (1)          | 0.00 (1)      | 100               | 100           |
| ADJ;ESS;PL           | 0.00 (1)          | 0.00 (1)      | 100               | 100           |
| ACC;ADJ;MASC;SG      | 0.00 (1)          | 0.00 (1)      | 100               | 100           |
| ACC;ADJ;NEUT;SG      | 0.00 (1)          | 0.00 (1)      | 100               | 100           |
| ADJ;GEN;PL           | 0.00 (1)          | 0.00 (1)      | 100               | 100           |
| ADJ;INS;MASC;SG      | 0.00 (1)          | 0.00 (1)      | 100               | 100           |
| ACC;ADJ;FEM;SG       | 0.00 (1)          | 0.00 (1)      | 100               | 100           |
| ACC;ADJ;INAN;MASC;SG | 0.00 (1)          | 0.00 (1)      | 100               | 100           |
| ADJ;MASC;NOM;SG      | 0.00 (1)          | 0.00 (1)      | 100               | 100           |
| ADJ;DAT;FEM;SG       | 0.00 (1)          | 0.00 (1)      | 100               | 100           |
| ADJ;NEUT;NOM;SG      | 0.00 (1)          | 0.00 (1)      | 100               | 100           |
| ADJ;ESS;NEUT;SG      | 0.00 (1)          | 0.00 (1)      | 100               | 100           |
| ADJ;FEM;NOM;SG       | 0.00 (1)          | 0.00 (1)      | 100               | 100           |
| ADJ;DAT;NEUT;SG      | 0.00 (1)          | 0.00 (1)      | 100               | 100           |
| ADJ;INS;PL           | 0.00 (1)          | 0.00 (1)      | 100               | 100           |
| ADJ;DAT;MASC;SG      | 0.00 (1)          | 0.00 (1)      | 100               | 100           |
| ADJ;GEN;MASC;SG      | 0.00 (1)          | 0.00 (1)      | 100               | 100           |
| ADJ;ESS;MASC;SG      | 0.00 (1)          | 0.00 (1)      | 100               | 100           |
| ADJ;ESS;FEM;SG       | 0.00 (1)          | 0.00 (1)      | 100               | 100           |

Table 11: The performance of Artetxe et al. (2016)’s model on translating words belonging to a specific morphological category for the Czech–Ukrainian language pair (the grey numbers correspond to the dictionary sizes).



| Polish–Czech         |                   |               |                   |               |
|----------------------|-------------------|---------------|-------------------|---------------|
| Morph                | Normal (In vocab) | Normal (+OOV) | Lexeme (In vocab) | Lexeme (+OOV) |
| ALL                  | 39.97 (4043)      | 32.91 (5332)  | 82.39             | 76.73         |
| DAT;N;SG             | 24.64 (280)       | 16.86 (427)   | 59.29             | 44.03         |
| N;NOM;PL             | 40.72 (388)       | 37.89 (417)   | 85.05             | 82.73         |
| GEN;N;SG             | 41.06 (414)       | 39.58 (427)   | 83.82             | 81.26         |
| ESS;N;PL             | 49.80 (255)       | 36.30 (416)   | 93.33             | 93.03         |
| N;SG;VOC             | 32.62 (187)       | 22.95 (427)   | 62.03             | 51.29         |
| N;PL;VOC             | 40.72 (388)       | 37.89 (417)   | 85.05             | 82.73         |
| ESS;N;SG             | 32.74 (336)       | 27.06 (425)   | 62.2              | 55.76         |
| DAT;N;PL             | 45.05 (182)       | 29.33 (416)   | 96.15             | 95.43         |
| GEN;N;PL             | 45.11 (368)       | 39.95 (418)   | 80.16             | 76.56         |
| ACC;N;PL             | 42.13 (394)       | 39.71 (418)   | 85.28             | 83.49         |
| INS;N;PL             | 30.79 (315)       | 26.20 (416)   | 85.71             | 85.1          |
| INS;N;SG             | 42.35 (366)       | 37.32 (426)   | 81.97             | 80.99         |
| ACC;N;SG             | 43.84 (406)       | 41.69 (427)   | 80.05             | 76.81         |
| N;NOM;SG             | 41.71 (422)       | 40.75 (427)   | 80.81             | 78.69         |
| ACC;ADJ;MASC;SG      | 49.28 (69)        | 49.28 (69)    | 100               | 100           |
| ACC;ADJ;FEM;SG       | 46.97 (66)        | 46.38 (69)    | 100               | 98.55         |
| ADJ;ESS;MASC;SG      | 44.26 (61)        | 40.58 (69)    | 100               | 100           |
| ADJ;INS;MASC;SG      | 42.42 (66)        | 40.58 (69)    | 100               | 100           |
| ADJ;MASC;NOM;SG      | 50.00 (66)        | 50.75 (67)    | 95.45             | 95.52         |
| ADJ;FEM;NOM;SG       | 49.23 (65)        | 50.75 (67)    | 96.92             | 97.01         |
| ADJ;NEUT;NOM;SG      | 49.25 (67)        | 49.25 (67)    | 97.01             | 97.01         |
| ADJ;DAT;MASC;SG      | 50.00 (32)        | 40.58 (69)    | 100               | 100           |
| ADJ;GEN;NEUT;SG      | 49.28 (69)        | 49.28 (69)    | 100               | 100           |
| ADJ;GEN;MASC;SG      | 49.28 (69)        | 49.28 (69)    | 100               | 100           |
| ADJ;MASC;NOM;PL      | 32.56 (43)        | 28.36 (67)    | 76.74             | 70.15         |
| ADJ;ESS;NEUT;SG      | 44.26 (61)        | 40.58 (69)    | 100               | 100           |
| ADJ;FEM;GEN;SG       | 41.79 (67)        | 43.48 (69)    | 89.55             | 86.96         |
| ADJ;ESS;FEM;SG       | 41.79 (67)        | 43.48 (69)    | 89.55             | 86.96         |
| ADJ;ESS;PL           | 41.79 (67)        | 42.03 (69)    | 100               | 100           |
| ACC;ADJ;INAN;MASC;SG | 50.00 (66)        | 50.75 (67)    | 95.45             | 95.52         |
| ACC;ADJ;MASC;PL      | 41.79 (67)        | 43.28 (67)    | 100               | 100           |
| ADJ;DAT;FEM;SG       | 41.79 (67)        | 43.48 (69)    | 89.55             | 86.96         |
| ACC;ADJ;NEUT;SG      | 47.83 (69)        | 47.83 (69)    | 97.1              | 97.1          |
| ADJ;GEN;PL           | 41.79 (67)        | 42.03 (69)    | 100               | 100           |
| ADJ;INS;PL           | 42.11 (57)        | 39.13 (69)    | 100               | 100           |
| ADJ;DAT;NEUT;SG      | 50.00 (32)        | 40.58 (69)    | 100               | 100           |
| ADJ;DAT;PL           | 42.42 (66)        | 40.58 (69)    | 100               | 100           |
| 3;MASC;PST;SG;V      | 54.55 (33)        | 50.00 (36)    | 90.91             | 91.67         |
| 3;FEM;PST;SG;V       | 56.67 (30)        | 48.65 (37)    | 90                | 89.19         |
| 3;PL;PRS;V           | 35.00 (20)        | 32.00 (25)    | 80                | 72            |
| 2;PRS;SG;V           | 44.44 (9)         | 28.00 (25)    | 66.67             | 60            |
| 2;IMP;SG;V           | 0.00 (18)         | 0.00 (37)     | 11.11             | 0             |
| 2;IMP;PL;V           | 22.22 (9)         | 8.11 (37)     | 55.56             | 21.62         |
| 3;NEUT;PST;SG;V      | 69.23 (26)        | 51.35 (37)    | 96.15             | 89.19         |
| 1;IMP;PL;V           | 20.00 (5)         | 2.70 (37)     | 20                | 5.41          |
| 2;PL;PRS;V           | 0.00 (4)          | 0.00 (25)     | 0                 | 24            |
| NFIN;V               | 44.74 (38)        | 42.50 (40)    | 94.74             | 95            |
| 3;PRS;SG;V           | 41.67 (24)        | 40.00 (25)    | 83.33             | 80            |
| 3;MASC;PL;PST;V      | 56.25 (32)        | 48.65 (37)    | 96.88             | 94.59         |
| 3;FEM;PL;PST;V       | 56.52 (23)        | 40.54 (37)    | 95.65             | 94.59         |
| 1;PL;PRS;V           | 40.00 (10)        | 20.00 (25)    | 90                | 56            |
| 1;PRS;SG;V           | 14.29 (14)        | 8.00 (25)     | 50                | 32            |
| ACC;ADJ;PL           | 0.00 (5)          | 0.00 (5)      | 100               | 100           |
| ADJ;INS;NEUT;SG      | 0.00 (5)          | 0.00 (5)      | 100               | 100           |
| ADJ;FEM;INS;SG       | 0.00 (5)          | 0.00 (5)      | 100               | 100           |
| ADJ;NOM;PL           | 0.00 (5)          | 0.00 (5)      | 100               | 100           |
| 3;FUT;SG;V           | 50.00 (10)        | 30.77 (13)    | 60                | 46.15         |
| 1;FUT;PL;V           | 25.00 (8)         | 15.38 (13)    | 50                | 38.46         |
| 2;FUT;SG;V           | 0.00 (3)          | 15.38 (13)    | 66.67             | 46.15         |
| 2;FUT;PL;V           | 0.00 (3)          | 15.38 (13)    | 0                 | 30.77         |
| 1;FUT;SG;V           | 12.50 (8)         | 0.00 (13)     | 62.5              | 30.77         |
| 3;FUT;PL;V           | 33.33 (9)         | 7.69 (13)     | 77.78             | 53.85         |

Table 12: The performance of Artetxe et al. (2016)’s model on translating words belonging to a specific morphological category for the Polish–Czech language pair (the grey numbers correspond to the dictionary sizes).

| Polish–Russian       |                   |               |                   |               |
|----------------------|-------------------|---------------|-------------------|---------------|
| Morph                | Normal (In vocab) | Normal (+OOV) | Lexeme (In vocab) | Lexeme (+OOV) |
| ALL                  | 47.04 (6814)      | 40.32 (9079)  | 84.88             | 82.18         |
| N;NOM;SG             | 41.54 (768)       | 40.46 (786)   | 76.82             | 75.32         |
| ACC;N;SG             | 41.18 (748)       | 39.44 (791)   | 76.47             | 74.21         |
| DAT;N;SG             | 37.47 (459)       | 27.34 (790)   | 77.78             | 69.24         |
| INS;N;SG             | 48.55 (688)       | 43.85 (789)   | 89.39             | 88.09         |
| ESS;N;SG             | 42.23 (611)       | 37.28 (786)   | 73.00             | 67.56         |
| GEN;N;SG             | 47.28 (753)       | 45.75 (789)   | 82.60             | 81.62         |
| ADJ;INS;PL           | 63.16 (133)       | 59.73 (149)   | 100.00            | 100           |
| ADJ;FEM;INS;SG       | 56.25 (144)       | 55.03 (149)   | 95.83             | 96.64         |
| ADJ;FEM;NOM;SG       | 54.86 (144)       | 52.35 (149)   | 91.67             | 89.93         |
| ADJ;DAT;FEM;SG       | 57.64 (144)       | 55.70 (149)   | 95.83             | 95.3          |
| ADJ;ESS;MASC;SG      | 63.04 (138)       | 59.06 (149)   | 98.55             | 97.99         |
| ADJ;INS;MASC;SG      | 60.42 (144)       | 59.06 (149)   | 98.61             | 97.99         |
| ADJ;NEUT;NOM;SG      | 60.28 (141)       | 57.05 (149)   | 93.62             | 93.29         |
| ADJ;DAT;PL           | 60.42 (144)       | 59.06 (149)   | 98.61             | 97.99         |
| ADJ;ESS;NEUT;SG      | 63.04 (138)       | 59.06 (149)   | 98.55             | 97.99         |
| ADJ;GEN;PL           | 62.07 (145)       | 60.40 (149)   | 99.31             | 98.66         |
| ADJ;DAT;NEUT;SG      | 51.28 (78)        | 44.97 (149)   | 100.00            | 100           |
| ACC;ADJ;FEM;SG       | 57.04 (142)       | 55.03 (149)   | 97.18             | 96.64         |
| ADJ;GEN;MASC;SG      | 56.25 (144)       | 54.36 (149)   | 98.61             | 97.99         |
| ACC;ADJ;MASC;SG      | 56.25 (144)       | 54.36 (149)   | 98.61             | 97.99         |
| ADJ;FEM;GEN;SG       | 57.64 (144)       | 55.70 (149)   | 95.83             | 95.3          |
| ACC;ADJ;INAN;MASC;SG | 54.17 (144)       | 53.02 (149)   | 90.97             | 89.93         |
| ADJ;INS;NEUT;SG      | 60.42 (144)       | 59.06 (149)   | 98.61             | 97.99         |
| ADJ;MASC;NOM;SG      | 54.17 (144)       | 53.02 (149)   | 90.97             | 89.93         |
| ADJ;NOM;PL           | 59.03 (144)       | 57.05 (149)   | 93.75             | 93.29         |
| ACC;ADJ;PL           | 58.22 (146)       | 57.05 (149)   | 93.15             | 93.29         |
| ADJ;DAT;MASC;SG      | 51.28 (78)        | 44.97 (149)   | 100.00            | 100           |
| ADJ;ESS;PL           | 62.07 (145)       | 60.40 (149)   | 99.31             | 98.66         |
| ACC;ADJ;NEUT;SG      | 60.28 (141)       | 57.05 (149)   | 93.62             | 93.29         |
| ADJ;GEN;NEUT;SG      | 56.25 (144)       | 54.36 (149)   | 98.61             | 97.99         |
| ADJ;ESS;FEM;SG       | 57.64 (144)       | 55.70 (149)   | 95.83             | 95.3          |
| INS;N;PL             | 50.42 (480)       | 41.63 (723)   | 97.71             | 98.62         |
| N;NOM;PL             | 45.22 (670)       | 43.27 (721)   | 80.75             | 79.33         |
| DAT;N;PL             | 54.17 (240)       | 37.34 (723)   | 94.58             | 94.88         |
| ACC;N;PL             | 46.77 (511)       | 44.19 (559)   | 82.00             | 80.5          |
| GEN;N;PL             | 46.65 (641)       | 42.72 (728)   | 80.50             | 77.47         |
| ESS;N;PL             | 55.76 (425)       | 43.98 (723)   | 96.00             | 95.57         |
| NFIN;V               | 48.15 (27)        | 46.67 (30)    | 96.30             | 96.67         |
| 3;FEM;PL;PST;V       | 9.52 (21)         | 12.90 (31)    | 71.43             | 77.42         |
| 2;IMP;PL;V           | 0.00 (5)          | 9.68 (31)     | 80.00             | 41.94         |
| 2;FEM;PST;SG;V       | 0.00 (1)          | 6.45 (31)     | 100.00            | 16.13         |
| 3;NEUT;PST;SG;V      | 18.75 (16)        | 25.81 (31)    | 56.25             | 83.87         |
| 3;MASC;PL;PST;V      | 28.00 (25)        | 32.26 (31)    | 84.00             | 87.1          |
| 1;FEM;PST;SG;V       | 11.11 (9)         | 6.45 (31)     | 22.22             | 9.68          |
| 3;MASC;PST;SG;V      | 40.00 (25)        | 35.48 (31)    | 88.00             | 80.65         |
| 2;MASC;PL;PST;V      | 0.00 (1)          | 9.68 (31)     | 0.00              | 48.39         |
| 2;IMP;SG;V           | 5.88 (17)         | 3.23 (31)     | 23.53             | 19.35         |
| 2;PRS;SG;V           | 20.00 (5)         | 4.76 (21)     | 40.00             | 47.62         |
| 2;PL;PRS;V           | 0.00 (3)          | 4.76 (21)     | 66.67             | 19.05         |
| 3;PL;PRS;V           | 29.41 (17)        | 23.81 (21)    | 94.12             | 95.24         |
| 3;FEM;PST;SG;V       | 26.92 (26)        | 29.03 (31)    | 88.46             | 93.55         |
| 1;PL;PRS;V           | 12.50 (8)         | 4.76 (21)     | 62.50             | 47.62         |
| 3;PRS;SG;V           | 23.81 (21)        | 23.81 (21)    | 85.71             | 85.71         |
| 1;PRS;SG;V           | 8.33 (12)         | 9.52 (21)     | 50.00             | 57.14         |
| 1;MASC;PL;PST;V      | 14.29 (7)         | 6.45 (31)     | 14.29             | 19.35         |
| 1;MASC;PST;SG;V      | 0.00 (16)         | 0.00 (31)     | 18.75             | 9.68          |
| 1;FEM;PL;PST;V       | -                 | 19.35 (31)    | -                 | 77.42         |
| 2;MASC;PST;SG;V      | 0.00 (10)         | 0.00 (31)     | 0.00              | 3.23          |
| 2;FEM;PL;PST;V       | -                 | 19.35 (31)    | -                 | 54.84         |
| 2;FUT;PL;V           | 0.00 (1)          | 0.00 (10)     | 100.00            | 30            |
| 1;FUT;PL;V           | 33.33 (3)         | 20.00 (10)    | 33.33             | 20            |
| 1;FUT;SG;V           | 0.00 (4)          | 0.00 (10)     | 0.00              | 20            |
| 2;FUT;SG;V           | 0.00 (1)          | 0.00 (10)     | 0.00              | 50            |
| 3;FUT;SG;V           | 0.00 (8)          | 0.00 (10)     | 62.50             | 60            |
| 3;FUT;PL;V           | 0.00 (8)          | 0.00 (10)     | 62.50             | 50            |

Table 13: The performance of Artetxe et al. (2016)’s model on translating words belonging to a specific morphological category for the Polish–Russian language pair (the grey numbers correspond to the dictionary sizes).

| Polish–Slovak        |                   |               |                   |               |
|----------------------|-------------------|---------------|-------------------|---------------|
| Morph                | Normal (In vocab) | Normal (+OOV) | Lexeme (In vocab) | Lexeme (+OOV) |
| ALL                  | 24.98 (1217)      | 19.83 (1689)  | 81.02             | 78.45         |
| INS;N;SG             | 27.64 (123)       | 22.29 (157)   | 92.68             | 90.45         |
| N;NOM;SG             | 21.43 (154)       | 21.02 (157)   | 72.73             | 71.34         |
| GEN;N;SG             | 20.83 (144)       | 19.75 (157)   | 72.92             | 68.15         |
| DAT;N;SG             | 13.19 (91)        | 9.55 (157)    | 65.93             | 54.14         |
| ACC;N;PL             | 22.79 (136)       | 20.51 (156)   | 76.47             | 72.44         |
| INS;N;PL             | 32.58 (89)        | 21.15 (156)   | 100.00            | 100           |
| DAT;N;PL             | 25.00 (68)        | 16.03 (156)   | 73.53             | 79.49         |
| N;NOM;PL             | 22.46 (138)       | 20.51 (156)   | 77.54             | 73.08         |
| ESS;N;SG             | 20.00 (110)       | 16.03 (156)   | 68.18             | 53.85         |
| GEN;N;PL             | 23.53 (119)       | 19.23 (156)   | 72.27             | 65.38         |
| ESS;N;PL             | 32.47 (77)        | 22.44 (156)   | 96.10             | 97.44         |
| ACC;N;SG             | 23.08 (143)       | 20.38 (157)   | 72.03             | 67.52         |
| ADJ;ESS;FEM;SG       | 17.65 (17)        | 20.00 (20)    | 88.24             | 90            |
| ADJ;ESS;MASC;SG      | 14.29 (14)        | 15.00 (20)    | 100.00            | 100           |
| ADJ;DAT;NEUT;SG      | 18.18 (11)        | 15.00 (20)    | 100.00            | 100           |
| ADJ;FEM;GEN;SG       | 17.65 (17)        | 20.00 (20)    | 88.24             | 90            |
| ADJ;DAT;PL           | 17.65 (17)        | 15.00 (20)    | 100.00            | 100           |
| ADJ;INS;PL           | 57.14 (14)        | 45.00 (20)    | 100.00            | 100           |
| ADJ;MASC;NOM;PL      | 9.09 (11)         | 10.00 (20)    | 81.82             | 85            |
| ADJ;GEN;NEUT;SG      | 22.22 (18)        | 25.00 (20)    | 94.44             | 95            |
| ADJ;ESS;NEUT;SG      | 14.29 (14)        | 15.00 (20)    | 100.00            | 100           |
| ACC;ADJ;MASC;SG      | 22.22 (18)        | 25.00 (20)    | 94.44             | 95            |
| ADJ;GEN;PL           | 57.89 (19)        | 55.00 (20)    | 100.00            | 100           |
| ADJ;FEM;INS;SG       | 53.85 (13)        | 40.00 (20)    | 100.00            | 100           |
| ADJ;INS;MASC;SG      | 17.65 (17)        | 15.00 (20)    | 100.00            | 100           |
| ADJ;INS;NEUT;SG      | 17.65 (17)        | 15.00 (20)    | 100.00            | 100           |
| ACC;ADJ;NEUT;SG      | 33.33 (18)        | 30.00 (20)    | 100.00            | 100           |
| ACC;ADJ;INAN;MASC;SG | 42.11 (19)        | 40.00 (20)    | 100.00            | 100           |
| ACC;ADJ;PL           | 33.33 (18)        | 30.00 (20)    | 100.00            | 100           |
| ACC;ADJ;MASC;PL      | 57.89 (19)        | 55.00 (20)    | 100.00            | 100           |
| ADJ;FEM;NOM;SG       | 22.22 (18)        | 20.00 (20)    | 83.33             | 75            |
| ADJ;ESS;PL           | 57.89 (19)        | 55.00 (20)    | 100.00            | 100           |
| ADJ;NOM;PL           | 33.33 (18)        | 30.00 (20)    | 100.00            | 100           |
| ADJ;GEN;MASC;SG      | 22.22 (18)        | 25.00 (20)    | 94.44             | 95            |
| ADJ;NEUT;NOM;SG      | 33.33 (18)        | 30.00 (20)    | 100.00            | 100           |
| ACC;ADJ;FEM;SG       | 46.67 (15)        | 40.00 (20)    | 100.00            | 100           |
| ADJ;MASC;NOM;SG      | 42.11 (19)        | 40.00 (20)    | 100.00            | 100           |
| ADJ;DAT;MASC;SG      | 18.18 (11)        | 15.00 (20)    | 100.00            | 100           |
| ADJ;DAT;FEM;SG       | 17.65 (17)        | 20.00 (20)    | 88.24             | 90            |
| NFIN;V               | 50.00 (10)        | 27.27 (11)    | 100.00            | 100           |
| 2;PRS;SG;V           | 0.00 (1)          | 0.00 (1)      | 0.00              | 0             |
| 1;PL;PRS;V           | 100.00 (1)        | 100.00 (1)    | 100.00            | 100           |
| 3;NEUT;PST;SG;V      | 0.00 (1)          | 0.00 (1)      | 0.00              | 0             |
| 3;MASC;PST;SG;V      | 0.00 (1)          | 0.00 (1)      | 0.00              | 0             |
| 2;IMP;SG;V           | -                 | 0.00 (1)      | -                 | 0             |
| 3;MASC;PL;PST;V      | 0.00 (1)          | 0.00 (1)      | 0.00              | 0             |
| 3;FEM;PL;PST;V       | 0.00 (1)          | 0.00 (1)      | 0.00              | 0             |
| 1;IMP;PL;V           | -                 | 0.00 (1)      | -                 | 0             |
| 3;PRS;SG;V           | 100.00 (1)        | 100.00 (1)    | 100.00            | 100           |
| 2;PL;PRS;V           | 0.00 (1)          | 0.00 (1)      | 100.00            | 100           |
| 2;IMP;PL;V           | -                 | 0.00 (1)      | -                 | 0             |
| 3;FEM;PST;SG;V       | 0.00 (1)          | 0.00 (1)      | 0.00              | 0             |
| 1;PRS;SG;V           | 0.00 (1)          | 0.00 (1)      | 0.00              | 0             |
| 3;PL;PRS;V           | 100.00 (1)        | 100.00 (1)    | 100.00            | 100           |

Table 14: The performance of [Artetxe et al. \(2016\)](#)’s model on translating words belonging to a specific morphological category for the Polish–Slovak language pair (the grey numbers correspond to the dictionary sizes).

| Polish–Ukrainian     |                   |               |                   |               |
|----------------------|-------------------|---------------|-------------------|---------------|
| Morph                | Normal (In vocab) | Normal (+OOV) | Lexeme (In vocab) | Lexeme (+OOV) |
| ALL                  | 29.87 (1118)      | 24.81 (1463)  | 75.22             | 72.04         |
| N;PL;VOC             | 28.68 (129)       | 27.82 (133)   | 75.97             | 72.93         |
| N;NOM;PL             | 28.68 (129)       | 27.82 (133)   | 75.97             | 72.93         |
| ACC;N;PL             | 28.68 (129)       | 27.82 (133)   | 76.74             | 73.68         |
| ACC;N;SG             | 30.77 (130)       | 29.41 (136)   | 70.77             | 68.38         |
| ESS;N;PL             | 35.63 (87)        | 27.82 (133)   | 91.95             | 93.23         |
| N;SG;VOC             | 20.31 (64)        | 14.71 (136)   | 62.50             | 52.94         |
| INS;N;PL             | 36.63 (101)       | 29.32 (133)   | 100.00            | 99.25         |
| GEN;N;SG             | 30.83 (133)       | 30.15 (136)   | 75.19             | 73.53         |
| DAT;N;PL             | 35.71 (56)        | 24.81 (133)   | 96.43             | 96.24         |
| INS;N;SG             | 38.26 (115)       | 32.35 (136)   | 81.74             | 79.41         |
| N;NOM;SG             | 28.68 (136)       | 28.47 (137)   | 67.65             | 66.42         |
| ESS;N;SG             | 26.72 (116)       | 23.53 (136)   | 67.24             | 59.56         |
| DAT;N;SG             | 20.21 (94)        | 14.71 (136)   | 57.45             | 41.91         |
| GEN;N;PL             | 33.06 (121)       | 30.08 (133)   | 76.03             | 75.19         |
| 2;MASC;PST;SG;V      | 0.00 (4)          | 0.00 (7)      | 25.00             | 14.29         |
| 1;FEM;PL;PST;V       | -                 | 14.29 (7)     | -                 | 85.71         |
| 1;MASC;PST;SG;V      | 0.00 (5)          | 0.00 (7)      | 40.00             | 28.57         |
| 3;FEM;PL;PST;V       | 16.67 (6)         | 14.29 (7)     | 83.33             | 85.71         |
| 2;FUT;SG;V           | 0.00 (1)          | 0.00 (1)      | 0.00              | 0             |
| 2;MASC;PL;PST;V      | 0.00 (2)          | 14.29 (7)     | 0.00              | 42.86         |
| 3;NEUT;PST;SG;V      | 60.00 (5)         | 57.14 (7)     | 100.00            | 100           |
| 1;MASC;PL;PST;V      | 33.33 (3)         | 14.29 (7)     | 33.33             | 28.57         |
| 1;FUT;PL;V           | 0.00 (1)          | 0.00 (1)      | 100.00            | 100           |
| 1;FEM;PST;SG;V       | 0.00 (4)          | 0.00 (7)      | 50.00             | 28.57         |
| NFIN;V               | 57.14 (7)         | 57.14 (7)     | 100.00            | 100           |
| 3;FUT;PL;V           | 100.00 (1)        | 100.00 (1)    | 100.00            | 100           |
| 2;FEM;PST;SG;V       | 0.00 (1)          | 0.00 (7)      | 0.00              | 28.57         |
| 3;MASC;PL;PST;V      | 16.67 (6)         | 14.29 (7)     | 83.33             | 85.71         |
| 2;IMP;SG;V           | 0.00 (7)          | 0.00 (7)      | 0.00              | 0             |
| 2;IMP;PL;V           | 0.00 (4)          | 0.00 (7)      | 50.00             | 28.57         |
| 3;MASC;PST;SG;V      | 28.57 (7)         | 28.57 (7)     | 100.00            | 100           |
| 3;FEM;PST;SG;V       | 42.86 (7)         | 42.86 (7)     | 100.00            | 100           |
| 3;FUT;SG;V           | 0.00 (1)          | 0.00 (1)      | 0.00              | 0             |
| 2;FEM;PL;PST;V       | -                 | 14.29 (7)     | -                 | 28.57         |
| 1;FUT;SG;V           | 0.00 (1)          | 0.00 (1)      | 100.00            | 100           |
| 2;FUT;PL;V           | 0.00 (1)          | 0.00 (1)      | 100.00            | 100           |
| 1;IMP;PL;V           | 0.00 (3)          | 0.00 (7)      | 0.00              | 0             |
| 1;PRS;SG;V           | 16.67 (6)         | 0.00 (6)      | 50.00             | 33.33         |
| 3;PL;PRS;V           | 33.33 (6)         | 33.33 (6)     | 83.33             | 83.33         |
| 2;PRS;SG;V           | 25.00 (4)         | 16.67 (6)     | 75.00             | 66.67         |
| 2;PL;PRS;V           | 0.00 (3)          | 16.67 (6)     | 0.00              | 16.67         |
| 1;PL;PRS;V           | 25.00 (4)         | 33.33 (6)     | 75.00             | 83.33         |
| 3;PRS;SG;V           | 50.00 (6)         | 50.00 (6)     | 83.33             | 83.33         |
| ACC;ADJ;MASC;SG      | 0.00 (2)          | 0.00 (2)      | 100.00            | 100           |
| ADJ;DAT;FEM;SG       | -                 | 0.00 (2)      | -                 | 100           |
| ADJ;NEUT;NOM;SG      | 100.00 (2)        | 100.00 (2)    | 100.00            | 100           |
| ACC;ADJ;PL           | 100.00 (2)        | 100.00 (2)    | 100.00            | 100           |
| ADJ;FEM;INS;SG       | 0.00 (2)          | 0.00 (2)      | 100.00            | 100           |
| ADJ;INS;MASC;SG      | 0.00 (2)          | 0.00 (2)      | 100.00            | 100           |
| ADJ;FEM;NOM;SG       | 0.00 (2)          | 0.00 (2)      | 100.00            | 100           |
| ADJ;GEN;PL           | 0.00 (2)          | 0.00 (2)      | 100.00            | 100           |
| ADJ;NOM;PL           | 100.00 (2)        | 100.00 (2)    | 100.00            | 100           |
| ADJ;DAT;NEUT;SG      | -                 | 0.00 (2)      | -                 | 100           |
| ADJ;ESS;NEUT;SG      | -                 | 0.00 (2)      | -                 | 100           |
| ADJ;MASC;NOM;SG      | 0.00 (2)          | 0.00 (2)      | 100.00            | 100           |
| ADJ;GEN;NEUT;SG      | 0.00 (2)          | 0.00 (2)      | 100.00            | 100           |
| ADJ;ESS;FEM;SG       | -                 | 0.00 (2)      | -                 | 100           |
| ADJ;ESS;PL           | 0.00 (2)          | 0.00 (2)      | 100.00            | 100           |
| ADJ;DAT;MASC;SG      | -                 | 0.00 (2)      | -                 | 100           |
| ADJ;INS;NEUT;SG      | 0.00 (2)          | 0.00 (2)      | 100.00            | 100           |
| ADJ;INS;PL           | 0.00 (1)          | 0.00 (2)      | 100.00            | 100           |
| ACC;ADJ;NEUT;SG      | 100.00 (2)        | 100.00 (2)    | 100.00            | 100           |
| ACC;ADJ;FEM;SG       | 0.00 (2)          | 0.00 (2)      | 100.00            | 100           |
| ADJ;DAT;PL           | 0.00 (2)          | 0.00 (2)      | 100.00            | 100           |
| ACC;ADJ;INAN;MASC;SG | 0.00 (2)          | 0.00 (2)      | 100.00            | 100           |
| ADJ;FEM;GEN;SG       | 0.00 (2)          | 0.00 (2)      | 100.00            | 100           |
| ADJ;ESS;MASC;SG      | -                 | 0.00 (2)      | -                 | 100           |
| ADJ;GEN;MASC;SG      | 0.00 (2)          | 0.00 (2)      | 100.00            | 100           |

Table 15: The performance of Artetxe et al. (2016)’s model on translating words belonging to a specific morphological category for the Polish–Ukrainian language pair (the grey numbers correspond to the dictionary sizes).

| Morph           | Normal (In vocab) | Catalan–French |                   |               |
|-----------------|-------------------|----------------|-------------------|---------------|
|                 |                   | Normal (+OOV)  | Lexeme (In vocab) | Lexeme (+OOV) |
| ALL             | 56.47 (5605)      | 33.77 (11367)  | 82.77             | 54.64         |
| N;SG            | 62.34 (1293)      | 61.17 (1321)   | 88.48             | 88.57         |
| N;PL            | 64.10 (1089)      | 60.28 (1221)   | 96.14             | 95.5          |
| 1;PL;PRS;SBJV;V | 21.67 (60)        | 12.79 (219)    | 35.00             | 25.11         |
| 1;COND;SG;V     | 64.36 (101)       | 49.32 (219)    | 94.06             | 88.13         |
| 1;PST;SBJV;SG;V | 3.33 (60)         | 18.26 (219)    | 16.67             | 39.73         |
| 2;PFV;PL;PST;V  | -                 | 0.46 (219)     | -                 | 0.46          |
| 2;IPFV;PL;PST;V | 0.00 (2)          | 1.37 (219)     | 0.00              | 4.11          |
| 3;COND;PL;V     | 68.92 (74)        | 46.82 (220)    | 94.59             | 89.09         |
| 2;PL;PRS;V      | 38.33 (60)        | 30.14 (219)    | 65.00             | 52.05         |
| 3;PL;PST;SBJV;V | 0.00 (64)         | 0.00 (220)     | 0.00              | 0             |
| 2;COND;PL;V     | 0.00 (1)          | 5.48 (219)     | 0.00              | 13.7          |
| NFIN;V          | 62.56 (211)       | 59.64 (223)    | 90.05             | 87            |
| 2;IMP;POS;SG;V  | 49.01 (202)       | 44.29 (219)    | 64.85             | 59.36         |
| 3;FUT;PL;V      | 73.33 (75)        | 51.36 (220)    | 94.67             | 93.18         |
| 2;IMP;PL;POS;V  | 38.33 (60)        | 30.14 (219)    | 66.67             | 52.05         |
| 1;FUT;SG;V      | 30.77 (26)        | 36.53 (219)    | 73.08             | 67.58         |
| 2;PL;PST;SBJV;V | 0.00 (1)          | 0.00 (219)     | 0.00              | 2.28          |
| 3;PST;SBJV;SG;V | 15.32 (111)       | 18.18 (220)    | 32.43             | 39.55         |
| 3;PFV;PST;SG;V  | 52.44 (164)       | 40.91 (220)    | 73.17             | 59.55         |
| 2;PST;SBJV;SG;V | 0.00 (3)          | 0.46 (219)     | 0.00              | 1.37          |
| 1;PRS;SBJV;SG;V | 27.63 (152)       | 23.98 (221)    | 42.76             | 37.1          |
| 1;IPFV;PL;PST;V | 0.00 (5)          | 1.37 (219)     | 0.00              | 3.65          |
| 1;COND;PL;V     | 0.00 (5)          | 11.42 (219)    | 20.00             | 26.03         |
| 3;PRS;SBJV;SG;V | 27.45 (153)       | 23.87 (222)    | 42.48             | 36.94         |
| 3;PFV;PL;PST;V  | 64.89 (131)       | 49.09 (220)    | 98.47             | 97.27         |
| 2;PRS;SBJV;SG;V | 5.56 (36)         | 6.33 (221)     | 13.89             | 11.31         |
| 3;IPFV;PL;PST;V | 68.35 (158)       | 57.73 (220)    | 95.57             | 95.45         |
| 1;PL;PST;SBJV;V | 0.00 (2)          | 0.00 (219)     | 0.00              | 0             |
| 3;FUT;SG;V      | 62.71 (118)       | 45.91 (220)    | 85.59             | 77.27         |
| 3;PL;PRS;SBJV;V | 47.01 (117)       | 36.04 (222)    | 72.65             | 60.81         |
| 2;PFV;PST;SG;V  | 0.00 (2)          | 0.91 (219)     | 0.00              | 2.28          |
| 1;PFV;PL;PST;V  | 0.00 (2)          | 0.91 (219)     | 0.00              | 2.28          |
| 3;IPFV;PST;SG;V | 60.92 (174)       | 54.55 (220)    | 91.95             | 88.18         |
| 2;PL;PRS;SBJV;V | 30.77 (39)        | 27.40 (219)    | 61.54             | 49.32         |
| 1;FUT;PL;V      | 40.62 (32)        | 33.33 (219)    | 59.38             | 67.58         |
| 3;PRS;SG;V      | 49.51 (204)       | 44.80 (221)    | 65.69             | 60.18         |
| 1;PRS;SG;V      | 14.29 (98)        | 14.03 (221)    | 26.53             | 23.08         |
| 2;FUT;PL;V      | 14.29 (7)         | 20.55 (219)    | 28.57             | 38.36         |
| 1;IMP;PL;POS;V  | 22.22 (72)        | 12.84 (218)    | 36.11             | 25.23         |
| 1;IPFV;PST;SG;V | 65.15 (132)       | 54.79 (219)    | 96.21             | 88.58         |
| 2;PRS;SG;V      | 29.07 (86)        | 19.09 (220)    | 46.51             | 32.27         |
| 2;FUT;SG;V      | 0.00 (5)          | 2.28 (219)     | 0.00              | 4.57          |
| 1;PFV;PST;SG;V  | 51.72 (29)        | 8.76 (217)     | 75.86             | 12.9          |
| 3;PL;PRS;V      | 61.90 (189)       | 55.66 (221)    | 88.89             | 85.07         |
| 3;COND;SG;V     | 64.41 (118)       | 49.09 (220)    | 92.37             | 88.18         |
| 2;COND;SG;V     | 0.00 (5)          | 0.46 (219)     | 40.00             | 4.57          |
| 2;IPFV;PST;SG;V | 0.00 (8)          | 1.37 (219)     | 12.50             | 3.2           |
| 1;PL;PRS;V      | 21.05 (76)        | 12.79 (219)    | 38.16             | 24.66         |
| ADJ;FEM;PL      | 67.47 (332)       | 67.16 (335)    | 98.80             | 98.81         |
| ADJ;MASC;PL     | 67.17 (329)       | 64.47 (349)    | 96.35             | 95.7          |
| ADJ;MASC;SG     | 70.39 (358)       | 69.51 (364)    | 96.65             | 96.7          |
| ADJ;FEM;SG      | 70.28 (360)       | 69.59 (365)    | 96.67             | 96.71         |

Table 16: The performance of [Artetxe et al. \(2016\)](#)’s model on translating words belonging to a specific morphological category for the Catalan–French language pair (the grey numbers correspond to the dictionary sizes).

| Morph           | Catalan–Italian   |               |                   |               |
|-----------------|-------------------|---------------|-------------------|---------------|
|                 | Normal (In vocab) | Normal (+OOV) | Lexeme (In vocab) | Lexeme (+OOV) |
| ALL             | 53.77 (5518)      | 30.74 (11970) | 83.15             | 53.43         |
| 2;FUT;SG;V      | 0.00 (10)         | 3.73 (241)    | 20.00             | 11.62         |
| 2;IPFV;PL;PST;V | 0.00 (1)          | 2.90 (241)    | 0.00              | 8.3           |
| 1;PFV;PL;PST;V  | 0.00 (1)          | 0.00 (241)    | 0.00              | 0.41          |
| 1;IPFV;PL;PST;V | 33.33 (6)         | 16.60 (241)   | 66.67             | 31.54         |
| 3;IMP;PL;POS;V  | 22.64 (106)       | 15.70 (242)   | 33.96             | 28.1          |
| 2;PL;PRS;SBJV;V | 20.69 (29)        | 10.83 (240)   | 34.48             | 28.33         |
| 2;PFV;PL;PST;V  | -                 | 0.83 (241)    | -                 | 3.32          |
| 3;IMP;POS;SG;V  | 24.11 (141)       | 16.94 (242)   | 39.72             | 30.17         |
| 3;PST;SBJV;SG;V | 46.92 (130)       | 41.49 (241)   | 82.31             | 77.18         |
| 1;IPFV;PST;SG;V | 65.00 (100)       | 59.34 (241)   | 92.00             | 87.97         |
| 1;FUT;PL;V      | 44.00 (25)        | 17.43 (241)   | 64.00             | 41.91         |
| 1;PL;PRS;V      | 27.14 (70)        | 20.42 (240)   | 64.29             | 52.5          |
| 1;FUT;SG;V      | 40.91 (22)        | 23.65 (241)   | 68.18             | 52.28         |
| 3;PRS;SG;V      | 50.68 (221)       | 48.56 (243)   | 70.59             | 66.67         |
| 2;PRS;SG;V      | 19.78 (91)        | 9.09 (242)    | 40.66             | 16.94         |
| 1;PL;PRS;SBJV;V | 23.19 (69)        | 18.33 (240)   | 60.87             | 52.08         |
| 3;IPFV;PL;PST;V | 68.94 (161)       | 58.68 (242)   | 96.89             | 96.69         |
| 3;COND;PL;V     | 14.06 (64)        | 17.36 (242)   | 28.12             | 43.8          |
| 3;COND;SG;V     | 23.01 (113)       | 23.55 (242)   | 46.90             | 61.16         |
| 2;PRS;SBJV;SG;V | 5.41 (37)         | 7.05 (241)    | 18.92             | 14.11         |
| 2;FUT;PL;V      | 0.00 (8)          | 5.39 (241)    | 37.50             | 16.6          |
| 2;IPFV;PST;SG;V | 0.00 (4)          | 3.73 (241)    | 0.00              | 3.73          |
| 3;PFV;PST;SG;V  | 51.16 (172)       | 44.21 (242)   | 72.67             | 69.42         |
| NFIN;V          | 64.22 (232)       | 62.55 (243)   | 93.53             | 93            |
| 3;PL;PST;SBJV;V | 48.39 (93)        | 36.10 (241)   | 98.92             | 99.17         |
| 2;IMP;POS;SG;V  | 52.09 (215)       | 48.76 (242)   | 70.23             | 65.7          |
| 3;IPFV;PST;SG;V | 66.30 (184)       | 59.09 (242)   | 90.22             | 88.02         |
| 3;PFV;PL;PST;V  | 62.14 (140)       | 54.55 (242)   | 94.29             | 95.04         |
| 1;COND;SG;V     | 24.74 (97)        | 23.24 (241)   | 46.39             | 61            |
| 1;PRS;SG;V      | 15.96 (94)        | 12.81 (242)   | 37.23             | 23.97         |
| 2;IMP;PL;POS;V  | 22.64 (53)        | 12.45 (241)   | 45.28             | 29.46         |
| 3;FUT;SG;V      | 58.82 (119)       | 46.28 (242)   | 94.12             | 87.6          |
| 1;IMP;PL;POS;V  | 23.19 (69)        | 18.33 (240)   | 60.87             | 52.08         |
| 2;PST;SBJV;SG;V | 0.00 (3)          | 0.83 (240)    | 66.67             | 5.42          |
| 2;PL;PRS;V      | 23.08 (52)        | 12.50 (240)   | 46.15             | 29.58         |
| 1;PST;SBJV;SG;V | 47.83 (69)        | 41.67 (240)   | 85.51             | 77.5          |
| 2;PL;PST;SBJV;V | -                 | 0.00 (240)    | -                 | 0             |
| 2;COND;PL;V     | 0.00 (2)          | 0.41 (241)    | 0.00              | 2.49          |
| 1;PFV;PST;SG;V  | 56.00 (25)        | 8.86 (237)    | 72.00             | 12.66         |
| 1;PRS;SBJV;SG;V | 24.29 (140)       | 17.01 (241)   | 40.00             | 30.29         |
| 3;PRS;SBJV;SG;V | 24.11 (141)       | 16.94 (242)   | 39.72             | 30.17         |
| 1;COND;PL;V     | 0.00 (5)          | 9.54 (241)    | 20.00             | 28.22         |
| 2;COND;SG;V     | 0.00 (5)          | 0.00 (241)    | 0.00              | 3.73          |
| 1;PL;PST;SBJV;V | 0.00 (4)          | 4.58 (240)    | 25.00             | 12.92         |
| 3;PL;PRS;V      | 53.23 (201)       | 47.93 (242)   | 86.07             | 81.4          |
| 3;FUT;PL;V      | 53.95 (76)        | 42.15 (242)   | 90.79             | 90.08         |
| 3;PL;PRS;SBJV;V | 22.64 (106)       | 15.70 (242)   | 33.96             | 28.1          |
| 2;PFV;PST;SG;V  | -                 | 0.00 (241)    | -                 | 1.24          |
| N;PL            | 59.74 (1083)      | 56.71 (1192)  | 92.06             | 91.19         |
| N;SG            | 63.58 (1307)      | 62.96 (1323)  | 93.19             | 92.89         |
| ADJ;FEM;SG      | 60.34 (290)       | 59.79 (291)   | 97.93             | 97.59         |
| ADJ;MASC;PL     | 65.33 (274)       | 64.18 (282)   | 95.62             | 95.74         |
| ADJ;FEM;PL      | 66.17 (269)       | 65.93 (270)   | 96.65             | 96.3          |
| ADJ;MASC;SG     | 60.14 (291)       | 59.59 (292)   | 97.94             | 97.6          |

Table 17: The performance of [Artetxe et al. \(2016\)](#)’s model on translating words belonging to a specific morphological category for the Catalan–Italian language pair (the grey numbers correspond to the dictionary sizes).



| Catalan–Portuguese |                   |               |                   |               |
|--------------------|-------------------|---------------|-------------------|---------------|
| Morph              | Normal (In vocab) | Normal (+OOV) | Lexeme (In vocab) | Lexeme (+OOV) |
| ALL                | 63.34 (5418)      | 41.79 (10759) | 84.50             | 60.01         |
| N;PL               | 68.65 (1027)      | 64.98 (1128)  | 92.50             | 91.93         |
| N;SG               | 66.25 (1209)      | 64.75 (1234)  | 88.92             | 88.98         |
| 3;PRS;SG;V         | 60.71 (224)       | 56.38 (243)   | 74.11             | 67.9          |
| 3;IPFV;PL;PST;V    | 75.29 (170)       | 65.98 (241)   | 97.65             | 97.93         |
| 1;FUT;PL;V         | 35.00 (20)        | 52.50 (240)   | 45.00             | 71.25         |
| 2;PRS;SBJV;SG;V    | 2.86 (35)         | 1.23 (243)    | 5.71              | 4.12          |
| 1;COND;PL;V        | 62.50 (8)         | 42.92 (240)   | 62.50             | 64.58         |
| 3;PRS;SBJV;SG;V    | 24.69 (162)       | 18.93 (243)   | 32.72             | 27.57         |
| 2;FUT;PL;V         | 0.00 (3)          | 0.00 (240)    | 0.00              | 0             |
| 1;PL;PRS;V         | 53.68 (95)        | 38.75 (240)   | 71.58             | 55.42         |
| 3;PFV;PL;PST;V     | 69.93 (153)       | 58.92 (241)   | 98.04             | 98.34         |
| 2;PRS;SG;V         | 41.98 (81)        | 31.28 (243)   | 50.62             | 38.68         |
| 2;IMP;POS;SG;V     | 59.19 (223)       | 55.14 (243)   | 73.09             | 67.08         |
| 3;COND;PL;V        | 71.95 (82)        | 61.41 (241)   | 86.59             | 88.38         |
| 3;IPFV;PST;SG;V    | 71.05 (190)       | 63.49 (241)   | 92.11             | 89.21         |
| 3;COND;SG;V        | 70.45 (132)       | 58.51 (241)   | 82.58             | 79.25         |
| 1;IMP;PL;POS;V     | 58.49 (53)        | 37.76 (241)   | 75.47             | 56.43         |
| 3;FUT;SG;V         | 74.80 (123)       | 61.83 (241)   | 91.06             | 92.12         |
| 2;IPFV;PST;SG;V    | 25.00 (4)         | 17.43 (241)   | 25.00             | 23.65         |
| 1;PL;PRS;SBJV;V    | 58.49 (53)        | 37.92 (240)   | 75.47             | 56.67         |
| 3;PL;PRS;SBJV;V    | 36.84 (133)       | 25.93 (243)   | 51.88             | 43.21         |
| 1;FUT;SG;V         | 57.89 (19)        | 55.60 (241)   | 68.42             | 78.01         |
| 1;IPFV;PST;SG;V    | 71.05 (190)       | 63.07 (241)   | 92.11             | 88.8          |
| 1;PFV;PST;SG;V     | 43.24 (37)        | 7.05 (241)    | 72.97             | 13.28         |
| 3;PL;PRS;V         | 66.83 (208)       | 60.49 (243)   | 90.38             | 85.6          |
| 2;PL;PRS;SBJV;V    | 10.00 (10)        | 3.33 (240)    | 10.00             | 5.83          |
| 3;IMP;PL;POS;V     | 36.84 (133)       | 25.93 (243)   | 51.88             | 43.21         |
| 1;PRS;SBJV;SG;V    | 24.69 (162)       | 18.93 (243)   | 32.72             | 27.57         |
| 3;FUT;PL;V         | 60.49 (81)        | 54.77 (241)   | 76.54             | 84.23         |
| 1;COND;SG;V        | 70.45 (132)       | 58.51 (241)   | 82.58             | 79.25         |
| 2;PFV;PL;PST;V     | -                 | 0.00 (240)    | -                 | 0.42          |
| 1;PFV;PL;PST;V     | 0.00 (1)          | 5.83 (240)    | 0.00              | 11.25         |
| 2;PL;PRS;V         | 5.88 (34)         | 4.17 (240)    | 5.88              | 6.67          |
| 2;COND;SG;V        | 66.67 (3)         | 22.41 (241)   | 100.00            | 36.51         |
| 2;FUT;SG;V         | 66.67 (6)         | 14.94 (241)   | 66.67             | 24.48         |
| 2;IMP;PL;POS;V     | 8.16 (49)         | 4.13 (242)    | 10.20             | 6.61          |
| 1;PRS;SG;V         | 36.63 (101)       | 24.28 (243)   | 49.50             | 34.57         |
| 3;IMP;POS;SG;V     | 24.69 (162)       | 18.93 (243)   | 32.72             | 27.57         |
| 3;PFV;PST;SG;V     | 65.78 (187)       | 55.60 (241)   | 84.49             | 77.59         |
| 2;PFV;PST;SG;V     | 0.00 (2)          | 0.41 (241)    | 0.00              | 0.41          |
| 1;IPFV;PL;PST;V    | 33.33 (3)         | 15.42 (240)   | 33.33             | 36.25         |
| NFIN;V             | 72.41 (232)       | 70.08 (244)   | 92.67             | 89.34         |
| 2;IPFV;PL;PST;V    | 0.00 (2)          | 1.25 (240)    | 0.00              | 2.08          |
| 2;COND;PL;V        | -                 | 0.83 (240)    | -                 | 1.25          |
| ADJ;FEM;SG         | 69.11 (327)       | 69.00 (329)   | 97.86             | 97.87         |
| ADJ;FEM;PL         | 75.92 (299)       | 74.50 (302)   | 99.00             | 98.68         |
| ADJ;MASC;PL        | 74.52 (310)       | 72.45 (323)   | 98.71             | 98.45         |
| ADJ;MASC;SG        | 69.33 (326)       | 68.37 (332)   | 97.85             | 97.59         |

Table 18: The performance of [Artetxe et al. \(2016\)](#)’s model on translating words belonging to a specific morphological category for the Catalan–Portuguese language pair (the grey numbers correspond to the dictionary sizes).



| Catalan–Spanish |                   |               |                   |               |
|-----------------|-------------------|---------------|-------------------|---------------|
| Morph           | Normal (In vocab) | Normal (+OOV) | Lexeme (In vocab) | Lexeme (+OOV) |
| ALL             | 69.26 (5879)      | 44.98 (12282) | 86.27             | 60.31         |
| ADJ;FEM;SG      | 76.02 (342)       | 75.14 (346)   | 98.54             | 98.27         |
| ADJ;FEM;PL      | 79.56 (318)       | 78.57 (322)   | 98.74             | 98.76         |
| ADJ;MASC;SG     | 75.66 (341)       | 74.78 (345)   | 98.53             | 98.26         |
| ADJ;MASC;PL     | 80.75 (322)       | 78.31 (332)   | 98.76             | 98.8          |
| 1;PL;PRS;SBJV;V | 46.15 (78)        | 29.96 (247)   | 58.97             | 45.34         |
| 1;COND;SG;V     | 83.82 (136)       | 70.16 (248)   | 98.53             | 95.16         |
| 1;PST;SBJV;SG;V | 40.00 (145)       | 34.01 (247)   | 50.34             | 53.04         |
| 1;PL;PST;SBJV;V | 0.00 (4)          | 2.02 (247)    | 0.00              | 8.1           |
| 1;PL;PRS;V      | 51.69 (89)        | 33.33 (246)   | 64.04             | 49.19         |
| 3;IPFV;PL;PST;V | 84.00 (175)       | 70.45 (247)   | 99.43             | 97.57         |
| 2;PFV;PL;PST;V  | -                 | 0.40 (248)    | -                 | 0.4           |
| 3;PST;SBJV;SG;V | 40.00 (145)       | 34.01 (247)   | 50.34             | 53.04         |
| 2;IMP;PL;POS;V  | 3.33 (60)         | 6.48 (247)    | 6.67              | 10.53         |
| 3;COND;PL;V     | 83.33 (90)        | 69.35 (248)   | 98.89             | 97.98         |
| 2;FUT;SG;V      | 63.64 (11)        | 42.34 (248)   | 72.73             | 53.63         |
| 3;IMP;PL;POS;V  | 51.54 (130)       | 35.22 (247)   | 65.38             | 48.58         |
| 3;PL;PRS;V      | 71.08 (204)       | 61.79 (246)   | 92.16             | 84.15         |
| 1;PRS;SG;V      | 20.75 (106)       | 21.05 (247)   | 35.85             | 29.55         |
| 1;IPFV;PL;PST;V | 20.00 (5)         | 18.62 (247)   | 60.00             | 38.46         |
| 2;PST;SBJV;SG;V | 0.00 (2)          | 2.83 (247)    | 0.00              | 3.24          |
| 1;PRS;SBJV;SG;V | 39.51 (162)       | 26.32 (247)   | 48.77             | 34.82         |
| 1;IPFV;PST;SG;V | 79.58 (191)       | 72.06 (247)   | 94.76             | 92.71         |
| 3;PRS;SBJV;SG;V | 39.51 (162)       | 26.32 (247)   | 48.77             | 34.82         |
| NFIN;V          | 72.34 (235)       | 69.35 (248)   | 92.77             | 91.53         |
| 1;IMP;PL;POS;V  | 46.15 (78)        | 29.96 (247)   | 58.97             | 45.34         |
| 1;FUT;PL;V      | 72.50 (40)        | 62.10 (248)   | 92.50             | 82.26         |
| 2;COND;PL;V     | 0.00 (1)          | 4.84 (248)    | 0.00              | 7.66          |
| 2;IMP;POS;SG;V  | 68.42 (228)       | 64.52 (248)   | 77.63             | 72.58         |
| 3;COND;SG;V     | 83.82 (136)       | 70.16 (248)   | 98.53             | 95.16         |
| 1;PFV;PST;SG;V  | 61.29 (31)        | 10.57 (246)   | 77.42             | 14.63         |
| 2;IPFV;PST;SG;V | 0.00 (4)          | 12.15 (247)   | 0.00              | 13.36         |
| 3;PL;PST;SBJV;V | 37.04 (108)       | 28.34 (247)   | 53.70             | 65.18         |
| 3;PFV;PST;SG;V  | 64.84 (182)       | 53.23 (248)   | 81.87             | 74.19         |
| 2;IPFV;PL;PST;V | -                 | 0.00 (247)    | -                 | 0.81          |
| 2;PL;PST;SBJV;V | -                 | 0.00 (247)    | -                 | 0             |
| 3;IPFV;PST;SG;V | 79.58 (191)       | 72.06 (247)   | 94.76             | 92.71         |
| 3;PFV;PL;PST;V  | 81.33 (150)       | 69.76 (248)   | 98.67             | 97.98         |
| 2;FUT;PL;V      | 0.00 (5)          | 21.37 (248)   | 20.00             | 32.26         |
| 1;PFV;PL;PST;V  | 0.00 (1)          | 13.31 (248)   | 0.00              | 20.16         |
| 2;PFV;PST;SG;V  | -                 | 0.00 (248)    | -                 | 0             |
| 1;COND;PL;V     | 66.67 (6)         | 60.08 (248)   | 83.33             | 81.45         |
| 3;PL;PRS;SBJV;V | 51.54 (130)       | 35.22 (247)   | 65.38             | 48.58         |
| 3;PRS;SG;V      | 69.13 (230)       | 65.32 (248)   | 79.13             | 74.19         |
| 2;PL;PRS;V      | 2.17 (46)         | 6.50 (246)    | 6.52              | 10.57         |
| 3;FUT;PL;V      | 82.61 (92)        | 70.16 (248)   | 98.91             | 94.76         |
| 3;IMP;POS;SG;V  | 39.51 (162)       | 26.32 (247)   | 48.77             | 34.82         |
| 3;FUT;SG;V      | 80.92 (131)       | 72.18 (248)   | 95.42             | 95.16         |
| 1;FUT;SG;V      | 66.67 (30)        | 58.87 (248)   | 80.00             | 78.23         |
| 2;PL;PRS;SBJV;V | 2.56 (39)         | 6.48 (247)    | 7.69              | 10.53         |
| 2;COND;SG;V     | 0.00 (2)          | 23.79 (248)   | 50.00             | 34.27         |
| 2;PRS;SG;V      | 50.00 (88)        | 35.22 (247)   | 61.36             | 43.32         |
| 2;PRS;SBJV;SG;V | 8.70 (46)         | 4.05 (247)    | 21.74             | 8.1           |
| N;SG            | 76.62 (1266)      | 75.82 (1278)  | 94.23             | 94.21         |
| N;PL            | 74.24 (1079)      | 72.26 (1175)  | 93.79             | 93.36         |

Table 19: The performance of [Artetxe et al. \(2016\)](#)’s model on translating words belonging to a specific morphological category for the Catalan–Spanish language pair (the grey numbers correspond to the dictionary sizes).

| Morph           | French–Catalan    |               |                   |               |
|-----------------|-------------------|---------------|-------------------|---------------|
|                 | Normal (In vocab) | Normal (+OOV) | Lexeme (In vocab) | Lexeme (+OOV) |
| ALL             | 41.57 (7845)      | 23.92 (16992) | 79.38             | 52.18         |
| N;SG            | 49.06 (1643)      | 47.74 (1682)  | 87.04             | 86.56         |
| N;PL            | 47.50 (1440)      | 45.76 (1593)  | 89.65             | 89.14         |
| ADJ;FEM;PL      | 54.45 (393)       | 53.35 (403)   | 97.46             | 97.52         |
| ADJ;FEM;SG      | 39.18 (416)       | 38.26 (426)   | 88.46             | 87.79         |
| ADJ;MASC;PL     | 57.82 (403)       | 54.91 (428)   | 97.27             | 97.2          |
| ADJ;MASC;SG     | 51.08 (417)       | 49.08 (434)   | 90.41             | 89.4          |
| 1;PL;PRS;SBJV;V | 20.45 (44)        | 5.80 (379)    | 29.55             | 17.68         |
| 3;PRS;SG;V      | 39.23 (362)       | 37.76 (384)   | 57.46             | 54.43         |
| 3;PST;SBJV;SG;V | 15.66 (83)        | 9.19 (381)    | 27.71             | 18.9          |
| 1;PST;SBJV;SG;V | 18.18 (22)        | 1.32 (380)    | 27.27             | 4.74          |
| 1;PL;PRS;V      | 17.27 (139)       | 9.47 (380)    | 46.76             | 19.21         |
| 2;PRS;SBJV;SG;V | 22.43 (107)       | 13.42 (380)   | 34.58             | 22.89         |
| 2;FUT;SG;V      | 13.04 (23)        | 7.07 (382)    | 34.78             | 14.92         |
| 3;IPFV;PL;PST;V | 46.27 (255)       | 38.85 (381)   | 95.29             | 96.33         |
| 1;PFV;PST;SG;V  | 2.13 (47)         | 2.36 (382)    | 6.38              | 6.28          |
| 3;PFV;PST;SG;V  | 37.85 (288)       | 31.33 (383)   | 56.94             | 47.78         |
| 2;COND;PL;V     | 0.00 (5)          | 18.68 (380)   | 0.00              | 55.26         |
| NFIN;V          | 46.49 (370)       | 45.83 (384)   | 92.70             | 88.8          |
| 2;PFV;PL;PST;V  | -                 | 0.00 (380)    | -                 | 0.53          |
| 3;PFV;PL;PST;V  | 39.91 (233)       | 29.66 (381)   | 97.42             | 97.64         |
| 1;PRS;SBJV;SG;V | 35.26 (312)       | 33.95 (380)   | 53.53             | 49.74         |
| 1;IMP;PL;POS;V  | 17.65 (136)       | 9.47 (380)    | 47.79             | 19.21         |
| 3;COND;PL;V     | 48.72 (117)       | 29.13 (381)   | 88.89             | 89.5          |
| 2;IPFV;PST;SG;V | 26.67 (30)        | 11.52 (382)   | 43.33             | 21.47         |
| 1;PFV;PL;PST;V  | 0.00 (2)          | 1.84 (380)    | 0.00              | 5             |
| 3;COND;SG;V     | 40.11 (187)       | 26.89 (383)   | 75.40             | 64.49         |
| 2;PRS;SG;V      | 22.70 (185)       | 14.62 (383)   | 36.22             | 26.11         |
| 1;FUT;PL;V      | 23.91 (46)        | 18.95 (380)   | 50.00             | 47.89         |
| 1;COND;PL;V     | 40.00 (5)         | 22.89 (380)   | 80.00             | 69.74         |
| 2;PST;SBJV;SG;V | 0.00 (3)          | 0.00 (380)    | 33.33             | 1.05          |
| 3;FUT;PL;V      | 45.22 (157)       | 32.81 (381)   | 82.17             | 91.34         |
| 2;PL;PRS;V      | 16.30 (135)       | 10.26 (380)   | 47.41             | 26.84         |
| 2;PL;PST;SBJV;V | 0.00 (1)          | 0.79 (379)    | 100.00            | 8.18          |
| 2;IMP;PL;POS;V  | 16.30 (135)       | 10.26 (380)   | 47.41             | 26.84         |
| 1;IPFV;PST;SG;V | 20.22 (89)        | 11.52 (382)   | 35.96             | 21.47         |
| 2;PL;PRS;SBJV;V | 19.44 (36)        | 7.92 (379)    | 63.89             | 27.7          |
| 1;FUT;SG;V      | 34.29 (70)        | 28.53 (382)   | 60.00             | 71.99         |
| 3;PL;PRS;SBJV;V | 45.28 (265)       | 37.89 (380)   | 84.91             | 75            |
| 3;PL;PST;SBJV;V | 32.14 (28)        | 2.63 (380)    | 50.00             | 11.58         |
| 3;IPFV;PST;SG;V | 44.86 (292)       | 38.38 (383)   | 84.59             | 83.55         |
| 2;PFV;PST;SG;V  | -                 | 1.57 (382)    | -                 | 5.24          |
| 2;IPFV;PL;PST;V | 33.33 (3)         | 7.89 (380)    | 33.33             | 27.37         |
| 2;IMP;POS;SG;V  | 33.15 (356)       | 31.94 (382)   | 50.84             | 48.69         |
| 1;COND;SG;V     | 7.46 (67)         | 1.05 (382)    | 16.42             | 3.14          |
| 3;PRS;SBJV;SG;V | 35.14 (313)       | 33.86 (381)   | 53.67             | 49.87         |
| 3;PL;PRS;V      | 41.34 (329)       | 37.80 (381)   | 84.19             | 75.33         |
| 2;COND;SG;V     | 0.00 (17)         | 1.05 (382)    | 5.88              | 3.14          |
| 1;PRS;SG;V      | 32.18 (261)       | 32.11 (383)   | 49.04             | 48.83         |
| 1;PL;PST;SBJV;V | 0.00 (1)          | 0.79 (379)    | 0.00              | 3.17          |
| 1;IPFV;PL;PST;V | 10.53 (19)        | 6.05 (380)    | 21.05             | 17.89         |
| 3;FUT;SG;V      | 50.00 (228)       | 42.04 (383)   | 88.60             | 90.34         |
| 2;FUT;PL;V      | 4.76 (21)         | 6.32 (380)    | 4.76              | 14.74         |

Table 20: The performance of [Artetxe et al. \(2016\)](#)’s model on translating words belonging to a specific morphological category for the French–Catalan language pair (the grey numbers correspond to the dictionary sizes).

| Morph           | French–Italian    |               |                   |               |
|-----------------|-------------------|---------------|-------------------|---------------|
|                 | Normal (In vocab) | Normal (+OOV) | Lexeme (In vocab) | Lexeme (+OOV) |
| ALL             | 49.37 (9891)      | 28.30 (22052) | 83.15             | 55.39         |
| N;PL            | 51.16 (1943)      | 47.04 (2281)  | 87.60             | 85.09         |
| N;SG            | 58.25 (2388)      | 56.20 (2491)  | 90.95             | 90.37         |
| 1;PFV;PL;PST;V  | 0.00 (3)          | 1.05 (477)    | 0.00              | 2.94          |
| 1;IMP;PL;POS;V  | 28.22 (163)       | 16.18 (482)   | 74.23             | 46.27         |
| 2;PL;PRS;V      | 28.06 (196)       | 20.79 (481)   | 65.31             | 44.28         |
| 3;PRS;SBJV;SG;V | 48.11 (397)       | 44.63 (484)   | 64.74             | 59.3          |
| 1;PST;SBJV;SG;V | 36.36 (11)        | 2.73 (477)    | 36.36             | 6.5           |
| 1;PL;PST;SBJV;V | 66.67 (3)         | 0.42 (476)    | 100.00            | 2.94          |
| 2;COND;PL;V     | 25.00 (4)         | 0.21 (480)    | 25.00             | 3.54          |
| NFIN;V          | 52.81 (462)       | 50.52 (485)   | 94.37             | 92.58         |
| 3;IPFV;PST;SG;V | 51.52 (330)       | 45.57 (485)   | 87.58             | 79.38         |
| 2;PRS;SG;V      | 22.66 (256)       | 15.15 (482)   | 42.58             | 26.35         |
| 2;PFV;PST;SG;V  | 20.00 (20)        | 2.51 (478)    | 35.00             | 5.23          |
| 1;FUT;PL;V      | 19.51 (41)        | 12.92 (480)   | 43.90             | 35.62         |
| 2;PST;SBJV;SG;V | -                 | 1.68 (477)    | -                 | 4.82          |
| 2;FUT;PL;V      | 4.35 (23)         | 7.92 (480)    | 17.39             | 33.33         |
| 2;COND;SG;V     | 18.92 (37)        | 16.42 (481)   | 40.54             | 55.93         |
| 3;FUT;SG;V      | 46.24 (266)       | 39.26 (484)   | 87.22             | 83.47         |
| 2;IPFV;PL;PST;V | 6.67 (15)         | 5.41 (481)    | 13.33             | 27.03         |
| 1;IPFV;PL;PST;V | 21.74 (23)        | 8.73 (481)    | 30.43             | 25.36         |
| 3;PFV;PST;SG;V  | 39.12 (363)       | 31.60 (481)   | 63.09             | 53.43         |
| 2;IMP;POS;SG;V  | 47.91 (430)       | 43.57 (482)   | 65.35             | 58.92         |
| 1;COND;PL;V     | 0.00 (5)          | 11.46 (480)   | 0.00              | 40.42         |
| 3;PL;PRS;V      | 47.65 (405)       | 42.74 (482)   | 81.73             | 73.65         |
| 1;COND;SG;V     | 16.90 (71)        | 16.42 (481)   | 50.70             | 56.13         |
| 2;IPFV;PST;SG;V | 24.44 (45)        | 19.50 (482)   | 35.56             | 36.51         |
| 3;COND;PL;V     | 32.46 (114)       | 32.43 (481)   | 70.18             | 90.02         |
| 1;PRS;SBJV;SG;V | 48.35 (395)       | 44.70 (481)   | 64.81             | 59.25         |
| 3;IPFV;PL;PST;V | 54.01 (274)       | 45.23 (482)   | 97.08             | 96.89         |
| 2;PFV;PL;PST;V  | -                 | 0.00 (477)    | -                 | 1.26          |
| 1;PRS;SG;V      | 46.97 (379)       | 43.78 (482)   | 63.85             | 58.92         |
| 3;COND;SG;V     | 35.68 (185)       | 32.64 (484)   | 73.51             | 85.74         |
| 1;IPFV;PST;SG;V | 23.29 (73)        | 19.50 (482)   | 34.25             | 36.51         |
| 2;PL;PST;SBJV;V | 0.00 (1)          | 0.42 (476)    | 0.00              | 2.1           |
| 2;PL;PRS;SBJV;V | 3.45 (29)         | 5.42 (480)    | 13.79             | 27.29         |
| 1;FUT;SG;V      | 22.22 (90)        | 20.79 (481)   | 60.00             | 53.64         |
| 2;FUT;SG;V      | 4.35 (23)         | 4.99 (481)    | 26.09             | 20.58         |
| 3;PST;SBJV;SG;V | 30.43 (69)        | 19.38 (480)   | 52.17             | 38.96         |
| 1;PFV;PST;SG;V  | 16.28 (43)        | 12.55 (478)   | 25.58             | 20.08         |
| 3;PFV;PL;PST;V  | 47.33 (262)       | 37.03 (478)   | 95.80             | 97.28         |
| 3;PRS;SG;V      | 49.78 (452)       | 46.60 (485)   | 66.81             | 62.06         |
| 2;IMP;PL;POS;V  | 28.06 (196)       | 20.75 (482)   | 65.31             | 44.4          |
| 3;PL;PST;SBJV;V | 55.00 (20)        | 5.24 (477)    | 60.00             | 12.79         |
| 1;PL;PRS;V      | 28.22 (163)       | 16.22 (481)   | 74.23             | 46.36         |
| 1;PL;PRS;SBJV;V | 17.50 (40)        | 8.75 (480)    | 32.50             | 25.62         |
| 3;FUT;PL;V      | 50.00 (172)       | 37.63 (481)   | 97.09             | 98.54         |
| 2;PRS;SBJV;SG;V | 23.29 (219)       | 13.93 (481)   | 42.92             | 24.32         |
| 3;PL;PRS;SBJV;V | 48.87 (309)       | 42.62 (481)   | 81.55             | 73.8          |
| ADJ;MASC;PL     | 67.27 (501)       | 65.39 (523)   | 96.01             | 95.79         |
| ADJ;MASC;SG     | 65.37 (514)       | 64.33 (527)   | 95.14             | 94.88         |
| ADJ;FEM;SG      | 63.28 (512)       | 62.74 (518)   | 93.75             | 93.63         |
| ADJ;FEM;PL      | 62.53 (491)       | 61.92 (499)   | 95.93             | 95.79         |

Table 21: The performance of [Artetxe et al. \(2016\)](#)’s model on translating words belonging to a specific morphological category for the French–Italian language pair (the grey numbers correspond to the dictionary sizes).

| Morph           | French–Portuguese |               |                   |               |
|-----------------|-------------------|---------------|-------------------|---------------|
|                 | Normal (In vocab) | Normal (+OOV) | Lexeme (In vocab) | Lexeme (+OOV) |
| ALL             | 49.51 (8930)      | 31.89 (17536) | 80.95             | 58.15         |
| ADJ;MASC;SG     | 62.22 (495)       | 60.75 (507)   | 94.34             | 93.89         |
| ADJ;FEM;PL      | 60.85 (470)       | 59.38 (480)   | 98.94             | 98.75         |
| ADJ;FEM;SG      | 63.41 (492)       | 62.90 (496)   | 95.73             | 95.36         |
| ADJ;MASC;PL     | 63.60 (478)       | 60.28 (501)   | 97.28             | 97.21         |
| N;SG            | 52.81 (2151)      | 51.13 (2222)  | 87.49             | 86.77         |
| N;PL            | 53.47 (1786)      | 50.32 (2039)  | 89.70             | 88.38         |
| 3;FUT;PL;V      | 46.21 (132)       | 39.73 (438)   | 81.82             | 95.89         |
| 3;IPFV;PST;SG;V | 50.49 (309)       | 44.55 (440)   | 83.17             | 82.5          |
| NFIN;V          | 58.77 (422)       | 56.24 (441)   | 92.89             | 89.8          |
| 2;PRS;SBJV;SG;V | 31.65 (139)       | 25.92 (436)   | 43.88             | 37.61         |
| 2;IMP;PL;POS;V  | 3.03 (132)        | 2.75 (436)    | 7.58              | 3.9           |
| 2;FUT;SG;V      | 15.79 (19)        | 18.31 (437)   | 15.79             | 37.07         |
| 2;PL;PRS;SBJV;V | 0.00 (12)         | 0.46 (436)    | 0.00              | 1.38          |
| 1;PL;PRS;V      | 41.01 (139)       | 24.03 (437)   | 76.26             | 42.79         |
| 3;PFV;PST;SG;V  | 41.19 (335)       | 33.72 (436)   | 62.39             | 52.29         |
| 2;PFV;PST;SG;V  | 13.04 (23)        | 1.15 (434)    | 17.39             | 1.61          |
| 2;FUT;PL;V      | 0.00 (13)         | 0.00 (437)    | 0.00              | 0             |
| 2;COND;SG;V     | 9.38 (32)         | 2.52 (437)    | 12.50             | 4.35          |
| 3;PL;PRS;SBJV;V | 55.03 (298)       | 46.00 (437)   | 81.88             | 73.91         |
| 1;IPFV;PL;PST;V | 3.70 (27)         | 5.26 (437)    | 11.11             | 14.87         |
| 3;PRS;SG;V      | 47.00 (417)       | 44.32 (440)   | 62.59             | 58.18         |
| 2;PL;PRS;V      | 2.53 (79)         | 2.75 (437)    | 5.06              | 3.89          |
| 1;PFV;PL;PST;V  | 33.33 (6)         | 5.53 (434)    | 50.00             | 16.59         |
| 1;IPFV;PST;SG;V | 19.78 (91)        | 14.19 (437)   | 28.57             | 22.2          |
| 1;PL;PRS;SBJV;V | 9.38 (32)         | 5.28 (436)    | 15.62             | 14.91         |
| 1;PRS;SBJV;SG;V | 41.71 (374)       | 38.30 (436)   | 57.22             | 52.06         |
| 1;COND;PL;V     | 40.00 (5)         | 31.81 (437)   | 60.00             | 63.16         |
| 3;COND;PL;V     | 50.00 (112)       | 31.74 (438)   | 86.61             | 80.14         |
| 3;PFV;PL;PST;V  | 53.04 (247)       | 36.64 (434)   | 94.33             | 93.32         |
| 2;PRS;SG;V      | 32.00 (200)       | 27.23 (437)   | 45.50             | 40.05         |
| 3;FUT;SG;V      | 55.17 (203)       | 44.32 (440)   | 82.27             | 87.5          |
| 1;FUT;PL;V      | 41.67 (36)        | 27.69 (437)   | 44.44             | 50.57         |
| 3;COND;SG;V     | 42.71 (192)       | 30.00 (440)   | 65.10             | 52.27         |
| 1;IMP;PL;POS;V  | 41.30 (92)        | 24.08 (436)   | 75.00             | 42.89         |
| 2;PFV;PL;PST;V  | 0.00 (2)          | 0.00 (434)    | 0.00              | 0.92          |
| 2;IMP;POS;SG;V  | 43.17 (410)       | 40.37 (436)   | 59.76             | 54.36         |
| 3;PL;PRS;V      | 53.04 (362)       | 46.35 (438)   | 81.49             | 73.97         |
| 1;PRS;SG;V      | 43.50 (354)       | 40.27 (437)   | 59.89             | 54.23         |
| 3;PRS;SBJV;SG;V | 41.91 (377)       | 38.50 (439)   | 57.29             | 52.16         |
| 2;IPFV;PST;SG;V | 17.65 (34)        | 14.19 (437)   | 29.41             | 22.2          |
| 1;COND;SG;V     | 10.67 (75)        | 2.52 (437)    | 14.67             | 4.35          |
| 1;FUT;SG;V      | 47.89 (71)        | 38.67 (437)   | 76.06             | 82.15         |
| 2;IPFV;PL;PST;V | 0.00 (26)         | 0.46 (437)    | 0.00              | 1.37          |
| 3;IPFV;PL;PST;V | 54.65 (269)       | 43.84 (438)   | 94.05             | 96.12         |
| 1;PFV;PST;SG;V  | 13.21 (53)        | 2.30 (434)    | 16.98             | 4.84          |
| 2;COND;PL;V     | -                 | 0.00 (437)    | -                 | 0             |

Table 22: The performance of [Artetxe et al. \(2016\)](#)’s model on translating words belonging to a specific morphological category for the French–Portuguese language pair (the grey numbers correspond to the dictionary sizes).

| Morph           | French–Spanish    |               |                   |               |
|-----------------|-------------------|---------------|-------------------|---------------|
|                 | Normal (In vocab) | Normal (+OOV) | Lexeme (In vocab) | Lexeme (+OOV) |
| ALL             | 49.13 (9770)      | 29.28 (21087) | 82.68             | 55.2          |
| N;PL            | 53.55 (1873)      | 49.44 (2154)  | 88.09             | 87.28         |
| N;SG            | 55.49 (2242)      | 54.05 (2311)  | 90.54             | 90.13         |
| 1;PFV;PST;SG;V  | 5.26 (57)         | 1.98 (455)    | 10.53             | 5.27          |
| 2;COND;SG;V     | 23.26 (43)        | 3.52 (455)    | 30.23             | 4.4           |
| 3;FUT;PL;V      | 54.91 (173)       | 44.74 (456)   | 95.38             | 98.46         |
| 1;PRS;SBJV;SG;V | 39.64 (386)       | 36.48 (455)   | 57.51             | 52.09         |
| 2;COND;PL;V     | 0.00 (2)          | 25.71 (455)   | 50.00             | 55.16         |
| 2;PL;PRS;SBJV;V | 8.82 (34)         | 1.98 (455)    | 14.71             | 6.15          |
| 1;FUT;PL;V      | 50.00 (42)        | 31.87 (455)   | 73.81             | 63.96         |
| 2;PRS;SG;V      | 37.95 (224)       | 25.71 (455)   | 53.12             | 40.22         |
| 3;COND;SG;V     | 51.43 (210)       | 39.39 (457)   | 90.48             | 85.12         |
| 2;IMP;PL;POS;V  | 0.77 (130)        | 3.30 (455)    | 1.54              | 5.93          |
| 1;COND;PL;V     | 33.33 (12)        | 19.34 (455)   | 58.33             | 52.09         |
| 3;PRS;SBJV;SG;V | 39.43 (388)       | 36.32 (457)   | 57.73             | 52.3          |
| 3;IPFV;PL;PST;V | 55.35 (271)       | 43.64 (456)   | 98.15             | 97.59         |
| 1;FUT;SG;V      | 40.23 (87)        | 27.91 (455)   | 65.52             | 55.16         |
| 2;PL;PST;SBJV;V | -                 | 0.00 (455)    | -                 | 0             |
| 2;PL;PRS;V      | 0.00 (91)         | 3.30 (455)    | 2.20              | 5.93          |
| 2;FUT;SG;V      | 28.12 (32)        | 16.70 (455)   | 43.75             | 36.04         |
| 3;PL;PRS;V      | 47.80 (387)       | 42.76 (456)   | 82.17             | 74.34         |
| 1;PL;PST;SBJV;V | -                 | 0.22 (455)    | -                 | 1.98          |
| 2;IPFV;PST;SG;V | 30.00 (50)        | 18.02 (455)   | 32.00             | 28.57         |
| 2;FUT;PL;V      | 6.67 (15)         | 22.42 (455)   | 40.00             | 50.11         |
| NFIN;V          | 50.57 (437)       | 49.23 (457)   | 93.14             | 90.37         |
| 3;PL;PST;SBJV;V | 38.46 (26)        | 3.73 (456)    | 69.23             | 9.21          |
| 2;PFV;PST;SG;V  | 8.89 (45)         | 1.54 (455)    | 17.78             | 3.96          |
| 3;FUT;SG;V      | 56.65 (263)       | 46.17 (457)   | 90.49             | 90.37         |
| 3;IPFV;PST;SG;V | 55.09 (334)       | 46.61 (457)   | 90.42             | 85.78         |
| 2;PFV;PL;PST;V  | 0.00 (1)          | 0.00 (455)    | 0.00              | 0.22          |
| 2;PRS;SBJV;SG;V | 38.80 (183)       | 23.96 (455)   | 56.83             | 37.36         |
| 1;PL;PRS;V      | 34.62 (156)       | 18.46 (455)   | 64.74             | 34.73         |
| 1;PL;PRS;SBJV;V | 20.51 (39)        | 5.05 (455)    | 25.64             | 13.85         |
| 3;PST;SBJV;SG;V | 11.11 (63)        | 10.07 (457)   | 23.81             | 19.47         |
| 1;IPFV;PST;SG;V | 20.69 (87)        | 18.02 (455)   | 29.89             | 28.57         |
| 2;IMP;POS;SG;V  | 38.88 (427)       | 36.26 (455)   | 56.21             | 51.65         |
| 1;IPFV;PL;PST;V | 20.69 (29)        | 5.05 (455)    | 24.14             | 13.85         |
| 2;IPFV;PL;PST;V | 42.86 (7)         | 1.98 (455)    | 42.86             | 6.15          |
| 1;IMP;PL;POS;V  | 35.97 (139)       | 18.46 (455)   | 64.03             | 34.73         |
| 1;PST;SBJV;SG;V | 15.00 (20)        | 2.64 (455)    | 20.00             | 5.05          |
| 3;PFV;PL;PST;V  | 46.80 (250)       | 35.96 (456)   | 98.40             | 95.39         |
| 3;PFV;PST;SG;V  | 38.83 (358)       | 33.26 (457)   | 56.98             | 49.02         |
| 2;PST;SBJV;SG;V | 0.00 (3)          | 3.52 (455)    | 0.00              | 6.59          |
| 1;COND;SG;V     | 15.19 (79)        | 3.52 (455)    | 25.32             | 4.4           |
| 1;PFV;PL;PST;V  | 40.00 (5)         | 1.98 (455)    | 40.00             | 5.93          |
| 3;COND;PL;V     | 53.45 (116)       | 34.21 (456)   | 96.55             | 93.64         |
| 1;PRS;SG;V      | 38.90 (401)       | 36.26 (455)   | 56.61             | 51.87         |
| 3;PL;PRS;SBJV;V | 49.30 (357)       | 42.54 (456)   | 84.31             | 74.34         |
| 3;PRS;SG;V      | 42.07 (435)       | 40.04 (457)   | 59.54             | 55.14         |
| ADJ;FEM;SG      | 58.30 (578)       | 57.71 (584)   | 93.77             | 93.66         |
| ADJ;MASC;PL     | 60.82 (564)       | 58.57 (589)   | 96.81             | 96.77         |
| ADJ;MASC;SG     | 60.83 (577)       | 59.36 (593)   | 94.80             | 94.44         |
| ADJ;FEM;PL      | 60.39 (558)       | 59.08 (567)   | 97.67             | 97.71         |

Table 23: The performance of [Artetxe et al. \(2016\)](#)’s model on translating words belonging to a specific morphological category for the French–Spanish language pair (the grey numbers correspond to the dictionary sizes).

| Morph           | Italian–Catalan   |               |                   |               |
|-----------------|-------------------|---------------|-------------------|---------------|
|                 | Normal (In vocab) | Normal (+OOV) | Lexeme (In vocab) | Lexeme (+OOV) |
| ALL             | 36.64 (9035)      | 18.70 (22636) | 77.17             | 49.41         |
| N;SG            | 42.96 (2153)      | 40.91 (2278)  | 83.70             | 82.57         |
| N;PL            | 42.76 (1665)      | 38.68 (1983)  | 90.03             | 88.1          |
| 2;FUT;SG;V      | 5.56 (18)         | 4.23 (473)    | 11.11             | 15.01         |
| 1;COND;PL;V     | 55.56 (9)         | 17.76 (473)   | 77.78             | 72.73         |
| 3;PFV;PST;SG;V  | 30.28 (327)       | 23.47 (473)   | 57.19             | 47.36         |
| 3;IMP;PL;POS;V  | 18.35 (158)       | 10.81 (472)   | 36.08             | 22.03         |
| 1;PRS;SBJV;SG;V | 29.00 (269)       | 19.66 (473)   | 48.70             | 34.67         |
| 2;FUT;PL;V      | 0.00 (13)         | 1.06 (473)    | 0.00              | 3.17          |
| 1;IPFV;PL;PST;V | 22.22 (9)         | 6.12 (474)    | 55.56             | 33.97         |
| 3;PRS;SBJV;SG;V | 29.00 (269)       | 19.66 (473)   | 48.70             | 34.67         |
| 1;PL;PST;SBJV;V | 0.00 (7)          | 2.96 (473)    | 0.00              | 12.9          |
| 2;PL;PST;SBJV;V | 0.00 (1)          | 0.63 (473)    | 0.00              | 2.11          |
| 1;PRS;SG;V      | 21.30 (216)       | 14.80 (473)   | 39.81             | 23.47         |
| 1;PL;PRS;SBJV;V | 23.36 (107)       | 3.81 (472)    | 51.40             | 13.98         |
| 2;PFV;PST;SG;V  | -                 | 0.21 (473)    | -                 | 0.63          |
| 2;COND;SG;V     | 0.00 (5)          | 0.00 (473)    | 0.00              | 0             |
| 3;IPFV;PST;SG;V | 41.61 (298)       | 30.80 (474)   | 83.89             | 79.75         |
| 1;PL;PRS;V      | 23.15 (108)       | 3.81 (472)    | 51.85             | 13.98         |
| 2;IPFV;PST;SG;V | 0.00 (3)          | 2.11 (474)    | 0.00              | 4.22          |
| 2;IPFV;PL;PST;V | 0.00 (1)          | 1.05 (474)    | 0.00              | 2.74          |
| 3;COND;PL;V     | 28.57 (56)        | 12.26 (473)   | 80.36             | 85.2          |
| 2;PFV;PL;PST;V  | -                 | 0.63 (473)    | -                 | 2.11          |
| 3;FUT;PL;V      | 41.96 (112)       | 20.51 (473)   | 88.39             | 88.58         |
| 3;FUT;SG;V      | 41.05 (190)       | 28.33 (473)   | 94.74             | 96.19         |
| 2;COND;PL;V     | 0.00 (2)          | 4.02 (473)    | 0.00              | 15.22         |
| 1;FUT;SG;V      | 33.33 (39)        | 17.12 (473)   | 61.54             | 46.72         |
| NFIN;V          | 41.22 (427)       | 37.55 (474)   | 93.44             | 89.45         |
| 3;IMP;POS;SG;V  | 29.10 (268)       | 19.70 (472)   | 49.25             | 34.96         |
| 3;PL;PRS;SBJV;V | 18.24 (159)       | 10.78 (473)   | 35.85             | 21.99         |
| 1;PFV;PST;SG;V  | 2.38 (42)         | 2.33 (473)    | 4.76              | 3.38          |
| 3;PFV;PL;PST;V  | 36.08 (255)       | 30.02 (473)   | 95.29             | 95.77         |
| 2;IMP;PL;POS;V  | 2.21 (181)        | 1.69 (473)    | 7.73              | 6.55          |
| 3;PL;PRS;V      | 33.71 (350)       | 26.85 (473)   | 74.29             | 62.58         |
| 2;PST;SBJV;SG;V | 22.22 (9)         | 3.81 (473)    | 33.33             | 11.21         |
| 2;IMP;POS;SG;V  | 30.47 (361)       | 23.68 (473)   | 50.42             | 38.48         |
| 2;PRS;SG;V      | 25.77 (194)       | 14.59 (473)   | 46.39             | 26.85         |
| 3;IPFV;PL;PST;V | 42.34 (248)       | 30.80 (474)   | 94.76             | 94.94         |
| 3;PST;SBJV;SG;V | 35.47 (172)       | 19.66 (473)   | 56.40             | 45.67         |
| 1;IPFV;PST;SG;V | 25.58 (43)        | 10.76 (474)   | 39.53             | 22.57         |
| 1;COND;SG;V     | 13.21 (53)        | 5.07 (473)    | 33.96             | 10.99         |
| 2;PL;PRS;V      | 2.20 (182)        | 1.69 (473)    | 8.24              | 6.77          |
| 3;COND;SG;V     | 22.41 (116)       | 10.78 (473)   | 64.66             | 55.39         |
| 1;IMP;PL;POS;V  | 23.58 (106)       | 3.81 (472)    | 50.94             | 13.77         |
| 3;PRS;SG;V      | 34.29 (420)       | 31.22 (474)   | 57.86             | 51.48         |
| 2;PRS;SBJV;SG;V | 30.56 (144)       | 19.66 (473)   | 55.56             | 34.67         |
| 1;PFV;PL;PST;V  | 0.00 (2)          | 1.06 (473)    | 0.00              | 2.33          |
| 2;PL;PRS;SBJV;V | 3.23 (31)         | 2.97 (472)    | 25.81             | 9.96          |
| 1;PST;SBJV;SG;V | 12.00 (25)        | 3.81 (473)    | 28.00             | 11.21         |
| 3;PL;PST;SBJV;V | 44.44 (117)       | 22.20 (473)   | 94.02             | 94.29         |
| 1;FUT;PL;V      | 37.14 (35)        | 20.72 (473)   | 68.57             | 71.88         |
| ADJ;MASC;SG     | 49.04 (416)       | 47.14 (437)   | 91.35             | 91.3          |
| ADJ;MASC;PL     | 53.23 (402)       | 50.71 (422)   | 94.28             | 94.31         |
| ADJ;FEM;SG      | 27.54 (414)       | 27.01 (422)   | 87.92             | 87.44         |
| ADJ;FEM;PL      | 52.23 (381)       | 51.69 (385)   | 93.96             | 93.51         |

Table 24: The performance of [Artetxe et al. \(2016\)](#)’s model on translating words belonging to a specific morphological category for the Italian–Catalan language pair (the grey numbers correspond to the dictionary sizes).



| Morph           | Italian–French    |               |                   |               |
|-----------------|-------------------|---------------|-------------------|---------------|
|                 | Normal (In vocab) | Normal (+OOV) | Lexeme (In vocab) | Lexeme (+OOV) |
| ALL             | 40.84 (12595)     | 21.36 (31419) | 79.32             | 53.41         |
| N;SG            | 48.26 (3106)      | 45.01 (3355)  | 88.02             | 87.06         |
| N;PL            | 49.34 (2333)      | 43.17 (2928)  | 91.08             | 88.97         |
| 3;PL;PST;SBJV;V | 0.00 (74)         | 0.00 (645)    | 0.00              | 0.16          |
| 1;PL;PST;SBJV;V | 0.00 (2)          | 0.00 (643)    | 0.00              | 0.16          |
| 1;FUT;PL;V      | 18.18 (33)        | 14.93 (643)   | 39.39             | 58.16         |
| 1;COND;PL;V     | 0.00 (9)          | 7.47 (643)    | 33.33             | 45.72         |
| 3;PL;PRS;V      | 40.80 (473)       | 33.33 (645)   | 85.84             | 75.5          |
| 1;COND;SG;V     | 40.00 (65)        | 23.64 (643)   | 78.46             | 88.18         |
| 1;PL;PRS;V      | 18.30 (153)       | 7.85 (637)    | 58.82             | 29.2          |
| 3;PFV;PST;SG;V  | 27.01 (448)       | 20.12 (646)   | 51.12             | 39.01         |
| 2;PFV;PST;SG;V  | 14.29 (7)         | 1.71 (643)    | 14.29             | 4.2           |
| NFIN;V          | 42.58 (573)       | 38.70 (646)   | 92.15             | 89.47         |
| 2;IMP;POS;SG;V  | 29.16 (487)       | 23.17 (643)   | 48.87             | 37.48         |
| 1;PRS;SG;V      | 25.07 (371)       | 15.86 (643)   | 40.16             | 25.82         |
| 1;IMP;PL;POS;V  | 18.30 (153)       | 7.85 (637)    | 58.82             | 29.2          |
| 3;PL;PRS;SBJV;V | 23.64 (220)       | 13.66 (644)   | 45.91             | 31.52         |
| 1;FUT;SG;V      | 45.59 (68)        | 21.31 (643)   | 85.29             | 66.1          |
| 2;IMP;PL;POS;V  | 7.08 (353)        | 7.15 (643)    | 34.56             | 32.19         |
| 1;PRS;SBJV;SG;V | 32.85 (417)       | 24.92 (642)   | 52.76             | 42.52         |
| 2;PFV;PL;PST;V  | 0.00 (3)          | 0.47 (643)    | 0.00              | 4.2           |
| 3;COND;PL;V     | 52.05 (73)        | 22.79 (645)   | 97.26             | 98.91         |
| 3;COND;SG;V     | 48.76 (121)       | 25.23 (646)   | 94.21             | 96.13         |
| 3;FUT;SG;V      | 39.62 (265)       | 26.63 (646)   | 88.30             | 77.24         |
| 2;PST;SBJV;SG;V | 0.00 (3)          | 1.40 (643)    | 0.00              | 4.2           |
| 3;PRS;SBJV;SG;V | 32.86 (420)       | 24.96 (645)   | 52.62             | 42.48         |
| 2;FUT;SG;V      | 22.22 (18)        | 5.13 (643)    | 27.78             | 14.77         |
| 1;PL;PRS;SBJV;V | 14.68 (109)       | 7.85 (637)    | 61.47             | 29.2          |
| 2;COND;SG;V     | 50.00 (16)        | 21.00 (643)   | 81.25             | 80.09         |
| 2;IPFV;PL;PST;V | -                 | 0.31 (643)    | -                 | 2.33          |
| 2;PRS;SG;V      | 32.49 (354)       | 21.96 (642)   | 52.54             | 37.69         |
| 3;IPFV;PST;SG;V | 44.68 (385)       | 35.76 (646)   | 89.09             | 82.2          |
| 3;FUT;PL;V      | 42.48 (153)       | 17.52 (645)   | 99.35             | 99.84         |
| 3;PFV;PL;PST;V  | 35.80 (352)       | 27.75 (645)   | 96.02             | 96.59         |
| 2;PRS;SBJV;SG;V | 34.88 (367)       | 24.92 (642)   | 55.31             | 42.52         |
| 1;IPFV;PL;PST;V | 0.00 (9)          | 0.47 (643)    | 0.00              | 1.87          |
| 2;IPFV;PST;SG;V | 13.64 (22)        | 1.87 (643)    | 36.36             | 7.93          |
| 2;COND;PL;V     | 0.00 (6)          | 0.78 (643)    | 0.00              | 4.51          |
| 2;FUT;PL;V      | 25.00 (12)        | 10.11 (643)   | 33.33             | 33.59         |
| 1;PFV;PST;SG;V  | 15.87 (63)        | 6.69 (643)    | 22.22             | 12.29         |
| 3;PRS;SG;V      | 32.33 (566)       | 29.41 (646)   | 54.59             | 47.52         |
| 2;PL;PRS;SBJV;V | 17.24 (29)        | 3.14 (637)    | 24.14             | 13.81         |
| 1;PST;SBJV;SG;V | 0.00 (8)          | 1.40 (643)    | 0.00              | 4.2           |
| 1;IPFV;PST;SG;V | 29.27 (41)        | 11.04 (643)   | 34.15             | 24.11         |
| 2;PL;PRS;V      | 7.37 (353)        | 7.31 (643)    | 34.56             | 32.19         |
| 2;PL;PST;SBJV;V | 0.00 (2)          | 0.47 (643)    | 0.00              | 4.2           |
| 1;PFV;PL;PST;V  | 0.00 (8)          | 0.62 (643)    | 25.00             | 3.42          |
| 3;PST;SBJV;SG;V | 3.95 (177)        | 7.12 (646)    | 9.60              | 25.54         |
| 3;IPFV;PL;PST;V | 43.83 (324)       | 32.87 (645)   | 98.46             | 96.59         |
| ADJ;FEM;SG      | 54.04 (631)       | 52.94 (646)   | 94.14             | 94.12         |
| ADJ;MASC;SG     | 55.96 (638)       | 53.57 (672)   | 93.57             | 93.3          |
| ADJ;FEM;PL      | 56.52 (598)       | 56.24 (601)   | 95.65             | 95.34         |
| ADJ;MASC;PL     | 55.94 (606)       | 53.33 (645)   | 94.72             | 93.8          |

Table 25: The performance of [Artetxe et al. \(2016\)](#)’s model on translating words belonging to a specific morphological category for the Italian–French language pair (the grey numbers correspond to the dictionary sizes).



| Italian–Portuguese |                   |               |                   |               |
|--------------------|-------------------|---------------|-------------------|---------------|
| Morph              | Normal (In vocab) | Normal (+OOV) | Lexeme (In vocab) | Lexeme (+OOV) |
| ALL                | 43.01 (10072)     | 21.02 (25704) | 79.20             | 50.31         |
| N;PL               | 47.10 (1968)      | 41.15 (2452)  | 87.91             | 86.83         |
| N;SG               | 47.02 (2650)      | 43.96 (2846)  | 85.66             | 84.72         |
| 2;COND;SG;V        | 0.00 (4)          | 0.00 (586)    | 0.00              | 0.17          |
| 1;PL;PRS;V         | 40.18 (112)       | 15.89 (579)   | 75.89             | 42.83         |
| 1;FUT;PL;V         | 46.15 (26)        | 20.99 (586)   | 61.54             | 74.74         |
| 3;PRS;SBJV;SG;V    | 26.84 (313)       | 18.09 (586)   | 38.98             | 28.67         |
| 1;IPFV;PST;SG;V    | 21.05 (38)        | 9.20 (587)    | 21.05             | 17.21         |
| 3;IMP;PL;POS;V     | 19.75 (162)       | 8.36 (586)    | 33.33             | 18.43         |
| 3;PRS;SG;V         | 38.00 (479)       | 31.86 (587)   | 59.92             | 49.06         |
| 3;COND;SG;V        | 32.43 (111)       | 11.43 (586)   | 69.37             | 34.3          |
| 3;IMP;POS;SG;V     | 26.84 (313)       | 18.09 (586)   | 38.98             | 28.67         |
| 1;PRS;SG;V         | 30.36 (280)       | 19.32 (585)   | 43.21             | 28.21         |
| 1;COND;PL;V        | 41.67 (12)        | 16.04 (586)   | 50.00             | 48.98         |
| 3;IPFV;PST;SG;V    | 49.36 (312)       | 34.24 (587)   | 80.77             | 77.68         |
| 3;PL;PRS;SBJV;V    | 19.75 (162)       | 8.36 (586)    | 33.33             | 18.43         |
| 3;PFV;PL;PST;V     | 50.34 (292)       | 31.35 (587)   | 96.23             | 93.02         |
| 1;IPFV;PL;PST;V    | 37.50 (8)         | 12.78 (587)   | 62.50             | 63.03         |
| 1;PL;PRS;SBJV;V    | 54.24 (59)        | 15.89 (579)   | 81.36             | 42.83         |
| 2;IPFV;PL;PST;V    | 0.00 (3)          | 0.00 (587)    | 0.00              | 1.19          |
| 1;COND;SG;V        | 10.14 (69)        | 1.02 (586)    | 14.49             | 1.71          |
| 2;PRS;SBJV;SG;V    | 28.36 (201)       | 18.09 (586)   | 42.29             | 28.67         |
| 3;FUT;SG;V         | 44.51 (173)       | 28.16 (586)   | 90.17             | 92.66         |
| 3;PFV;PST;SG;V     | 40.67 (386)       | 28.28 (587)   | 71.50             | 59.11         |
| 1;PRS;SBJV;SG;V    | 26.84 (313)       | 18.09 (586)   | 38.98             | 28.67         |
| 3;FUT;PL;V         | 41.30 (92)        | 14.16 (586)   | 91.30             | 96.08         |
| 3;COND;PL;V        | 30.51 (59)        | 10.92 (586)   | 72.88             | 66.72         |
| 1;PFV;PST;SG;V     | 10.17 (59)        | 0.85 (587)    | 11.86             | 3.07          |
| 2;FUT;SG;V         | 7.14 (14)         | 5.63 (586)    | 7.14              | 17.06         |
| 2;IMP;POS;SG;V     | 33.72 (436)       | 25.89 (587)   | 53.67             | 40.03         |
| 3;PL;PRS;V         | 44.53 (375)       | 32.20 (587)   | 77.33             | 66.1          |
| 2;PL;PRS;SBJV;V    | 20.00 (5)         | 0.35 (579)    | 20.00             | 0.86          |
| 2;PFV;PL;PST;V     | 0.00 (3)          | 0.34 (586)    | 33.33             | 1.71          |
| NFIN;V             | 46.25 (493)       | 40.89 (587)   | 95.13             | 87.73         |
| 2;COND;PL;V        | -                 | 0.00 (586)    | -                 | 0.17          |
| 3;IPFV;PL;PST;V    | 53.47 (245)       | 33.22 (587)   | 94.69             | 95.91         |
| 2;PFV;PST;SG;V     | 28.57 (7)         | 0.85 (586)    | 28.57             | 2.39          |
| 1;IMP;PL;POS;V     | 54.24 (59)        | 15.89 (579)   | 81.36             | 42.83         |
| 2;IMP;PL;POS;V     | 3.38 (148)        | 2.56 (587)    | 5.41              | 3.58          |
| 1;FUT;SG;V         | 39.53 (43)        | 21.67 (586)   | 74.42             | 70.31         |
| 2;IPFV;PST;SG;V    | 0.00 (4)          | 1.87 (587)    | 0.00              | 3.41          |
| 2;PRS;SG;V         | 22.97 (222)       | 16.24 (585)   | 35.59             | 25.13         |
| 2;PL;PRS;V         | 7.35 (68)         | 2.56 (587)    | 8.82              | 3.58          |
| 1;PFV;PL;PST;V     | 20.00 (10)        | 1.37 (586)    | 40.00             | 5.12          |
| 2;FUT;PL;V         | 0.00 (8)          | 0.00 (586)    | 0.00              | 0.34          |
| ADJ;MASC;SG        | 54.51 (532)       | 52.06 (557)   | 93.61             | 92.64         |
| ADJ;MASC;PL        | 54.58 (502)       | 51.59 (535)   | 95.62             | 95.89         |
| ADJ;FEM;SG         | 53.73 (523)       | 52.82 (532)   | 95.03             | 94.92         |
| ADJ;FEM;PL         | 55.26 (485)       | 53.74 (495)   | 96.08             | 95.76         |

Table 26: The performance of [Artetxe et al. \(2016\)](#)’s model on translating words belonging to a specific morphological category for the Italian–Portuguese language pair (the grey numbers correspond to the dictionary sizes).

| Morph           | Italian–Spanish   |               |                   |               |
|-----------------|-------------------|---------------|-------------------|---------------|
|                 | Normal (In vocab) | Normal (+OOV) | Lexeme (In vocab) | Lexeme (+OOV) |
| ALL             | 43.64 (11685)     | 22.58 (30686) | 78.87             | 52.24         |
| N;SG            | 47.90 (2756)      | 44.79 (2965)  | 87.12             | 85.87         |
| N;PL            | 46.65 (2092)      | 41.46 (2588)  | 86.95             | 85.94         |
| ADJ;FEM;SG      | 56.38 (596)       | 55.46 (604)   | 94.46             | 94.54         |
| ADJ;MASC;SG     | 54.02 (609)       | 52.29 (633)   | 91.46             | 91.63         |
| ADJ;MASC;PL     | 55.75 (583)       | 53.65 (617)   | 94.85             | 94.49         |
| ADJ;FEM;PL      | 56.01 (566)       | 56.04 (571)   | 92.40             | 92.47         |
| 1;PFV;PL;PST;V  | 7.14 (14)         | 7.00 (643)    | 7.14              | 12.44         |
| 2;IPFV;PST;SG;V | 22.22 (9)         | 2.33 (644)    | 22.22             | 5.43          |
| 3;PFV;PST;SG;V  | 37.32 (426)       | 29.04 (644)   | 68.78             | 59.47         |
| 3;PL;PRS;V      | 48.42 (442)       | 37.58 (644)   | 75.57             | 63.35         |
| 1;FUT;PL;V      | 48.48 (33)        | 24.22 (644)   | 84.85             | 74.53         |
| 1;PL;PRS;V      | 33.09 (136)       | 17.58 (637)   | 72.06             | 43.17         |
| 2;PFV;PL;PST;V  | 0.00 (1)          | 0.00 (643)    | 0.00              | 0.47          |
| 3;IPFV;PST;SG;V | 56.99 (365)       | 40.16 (645)   | 89.59             | 83.41         |
| 2;PL;PRS;V      | 3.85 (104)        | 1.86 (644)    | 3.85              | 4.04          |
| 1;COND;PL;V     | 44.44 (9)         | 24.53 (644)   | 88.89             | 91.15         |
| 3;FUT;PL;V      | 51.39 (144)       | 23.91 (644)   | 98.61             | 98.91         |
| 1;IPFV;PL;PST;V | 50.00 (8)         | 16.93 (644)   | 100.00            | 68.94         |
| 3;PRS;SG;V      | 41.82 (550)       | 35.97 (645)   | 62.18             | 52.56         |
| 3;COND;SG;V     | 39.32 (117)       | 15.97 (645)   | 80.34             | 45.89         |
| 2;PL;PST;SBJV;V | -                 | 0.00 (644)    | -                 | 0.47          |
| 1;FUT;SG;V      | 45.16 (62)        | 20.34 (644)   | 67.74             | 49.22         |
| 1;PFV;PST;SG;V  | 3.39 (59)         | 0.93 (643)    | 5.08              | 2.8           |
| 3;PRS;SBJV;SG;V | 31.54 (409)       | 24.38 (644)   | 47.19             | 37.58         |
| 1;PRS;SBJV;SG;V | 31.37 (408)       | 24.26 (643)   | 47.06             | 37.48         |
| 3;PL;PRS;SBJV;V | 22.11 (199)       | 11.20 (643)   | 35.68             | 20.68         |
| 1;PRS;SG;V      | 30.35 (369)       | 21.12 (644)   | 46.07             | 31.68         |
| 3;IMP;POS;SG;V  | 31.54 (409)       | 24.42 (643)   | 47.19             | 37.64         |
| 1;PL;PRS;SBJV;V | 33.62 (116)       | 17.58 (637)   | 68.97             | 43.17         |
| 2;IMP;PL;POS;V  | 2.79 (179)        | 1.82 (659)    | 4.47              | 3.95          |
| 3;FUT;SG;V      | 49.79 (243)       | 31.01 (645)   | 95.47             | 95.66         |
| 2;FUT;PL;V      | 16.67 (6)         | 10.56 (644)   | 33.33             | 33.85         |
| 1;PL;PST;SBJV;V | 0.00 (7)          | 1.86 (644)    | 14.29             | 7.61          |
| 3;IMP;PL;POS;V  | 22.22 (198)       | 11.21 (642)   | 35.86             | 20.72         |
| 3;PL;PST;SBJV;V | 18.94 (132)       | 16.61 (644)   | 33.33             | 52.02         |
| 3;IPFV;PL;PST;V | 61.59 (289)       | 37.42 (644)   | 98.96             | 97.67         |
| 2;PST;SBJV;SG;V | 0.00 (10)         | 2.95 (644)    | 0.00              | 7.3           |
| 3;PFV;PL;PST;V  | 50.00 (338)       | 34.84 (643)   | 96.75             | 95.18         |
| NFIN;V          | 45.44 (581)       | 41.00 (661)   | 93.12             | 88.65         |
| 3;COND;PL;V     | 36.07 (61)        | 16.15 (644)   | 93.44             | 84.01         |
| 2;PFV;PST;SG;V  | 0.00 (1)          | 0.62 (643)    | 0.00              | 0.93          |
| 1;IMP;PL;POS;V  | 32.76 (116)       | 17.02 (652)   | 68.97             | 44.48         |
| 1;IPFV;PST;SG;V | 15.00 (40)        | 10.71 (644)   | 20.00             | 18.32         |
| 2;PRS;SG;V      | 28.70 (331)       | 21.03 (642)   | 43.50             | 32.55         |
| 1;PST;SBJV;SG;V | 0.00 (26)         | 2.95 (644)    | 0.00              | 7.3           |
| 2;PL;PRS;SBJV;V | 0.00 (14)         | 0.16 (637)    | 0.00              | 0.94          |
| 2;IMP;POS;SG;V  | 37.55 (490)       | 28.98 (659)   | 55.92             | 42.64         |
| 2;IPFV;PL;PST;V | 0.00 (1)          | 0.93 (644)    | 0.00              | 1.4           |
| 2;COND;SG;V     | 16.67 (6)         | 1.86 (644)    | 33.33             | 4.19          |
| 2;COND;PL;V     | 0.00 (1)          | 6.52 (644)    | 0.00              | 21.74         |
| 1;COND;SG;V     | 24.62 (65)        | 3.57 (644)    | 41.54             | 5.12          |
| 3;PST;SBJV;SG;V | 31.98 (197)       | 22.64 (645)   | 47.72             | 48.22         |
| 2;PRS;SBJV;SG;V | 34.62 (338)       | 24.26 (643)   | 49.70             | 37.48         |
| 2;FUT;SG;V      | 35.00 (20)        | 15.22 (644)   | 50.00             | 44.72         |

Table 27: The performance of [Artetxe et al. \(2016\)](#)’s model on translating words belonging to a specific morphological category for the Italian–Spanish language pair (the grey numbers correspond to the dictionary sizes).

| Portuguese–Catalan |                   |               |                   |               |
|--------------------|-------------------|---------------|-------------------|---------------|
| Morph              | Normal (In vocab) | Normal (+OOV) | Lexeme (In vocab) | Lexeme (+OOV) |
| ALL                | 49.24 (7199)      | 28.24 (16059) | 80.97             | 53.09         |
| N;SG               | 53.70 (1527)      | 51.81 (1598)  | 88.93             | 88.61         |
| N;PL               | 52.90 (1274)      | 50.07 (1424)  | 90.74             | 90.17         |
| 3;FUT;PL;V         | 61.33 (75)        | 41.95 (348)   | 85.33             | 84.48         |
| 1;COND;PL;V        | 60.00 (5)         | 26.44 (348)   | 60.00             | 77.59         |
| NFIN;V             | 53.33 (330)       | 50.57 (348)   | 92.73             | 87.93         |
| 3;IPFV;PST;SG;V    | 55.34 (253)       | 44.83 (348)   | 86.17             | 81.32         |
| 1;FUT;PL;V         | 61.90 (21)        | 35.34 (348)   | 90.48             | 76.15         |
| 1;PFV;PL;PST;V     | 20.00 (5)         | 5.17 (348)    | 40.00             | 9.77          |
| 2;COND;SG;V        | 50.00 (2)         | 6.61 (348)    | 50.00             | 12.64         |
| 2;FUT;SG;V         | 0.00 (8)          | 3.74 (348)    | 0.00              | 9.77          |
| 1;IMP;PL;POS;V     | 14.29 (28)        | 10.37 (347)   | 39.29             | 24.78         |
| 2;PFV;PL;PST;V     | -                 | 0.00 (348)    | -                 | 0.57          |
| 1;PL;PRS;V         | 41.12 (107)       | 10.63 (348)   | 59.81             | 20.98         |
| 3;PRS;SG;V         | 43.89 (319)       | 42.36 (347)   | 60.82             | 58.5          |
| 3;IPFV;PL;PST;V    | 61.01 (218)       | 46.55 (348)   | 98.17             | 94.83         |
| 2;COND;PL;V        | -                 | 2.87 (348)    | -                 | 11.78         |
| 1;PL;PRS;SBJV;V    | 14.29 (28)        | 10.37 (347)   | 39.29             | 24.78         |
| 1;PRS;SG;V         | 23.56 (174)       | 16.76 (346)   | 40.23             | 28.32         |
| 3;IMP;PL;POS;V     | 30.25 (162)       | 17.87 (347)   | 43.83             | 34.58         |
| 2;PFV;PST;SG;V     | 0.00 (3)          | 0.29 (348)    | 0.00              | 0.29          |
| 3;PL;PRS;SBJV;V    | 30.25 (162)       | 17.87 (347)   | 43.83             | 34.58         |
| 2;PL;PRS;SBJV;V    | 0.00 (3)          | 2.02 (347)    | 0.00              | 2.31          |
| 3;PFV;PST;SG;V     | 45.85 (277)       | 40.52 (348)   | 68.59             | 62.07         |
| 2;PRS;SG;V         | 23.16 (95)        | 13.83 (347)   | 36.84             | 21.04         |
| 1;COND;SG;V        | 59.17 (169)       | 42.82 (348)   | 78.11             | 76.44         |
| 2;PL;PRS;V         | 28.57 (14)        | 1.72 (348)    | 35.71             | 1.72          |
| 1;IPFV;PST;SG;V    | 55.34 (253)       | 44.83 (348)   | 86.17             | 81.32         |
| 3;IMP;POS;SG;V     | 26.82 (220)       | 20.17 (347)   | 41.36             | 33.43         |
| 3;PFV;PL;PST;V     | 57.26 (234)       | 49.14 (348)   | 92.74             | 93.1          |
| 3;COND;PL;V        | 68.37 (98)        | 46.84 (348)   | 90.82             | 90.8          |
| 1;FUT;SG;V         | 67.74 (31)        | 34.77 (348)   | 83.87             | 60.34         |
| 3;PL;PRS;V         | 50.18 (283)       | 44.09 (347)   | 82.69             | 73.78         |
| 3;COND;SG;V        | 59.17 (169)       | 42.82 (348)   | 78.11             | 76.44         |
| 3;PRS;SBJV;SG;V    | 26.70 (221)       | 20.17 (347)   | 41.18             | 33.43         |
| 2;PRS;SBJV;SG;V    | 7.14 (42)         | 2.88 (347)    | 16.67             | 6.63          |
| 3;FUT;SG;V         | 69.85 (136)       | 50.86 (348)   | 96.32             | 93.97         |
| 2;IMP;PL;POS;V     | 7.32 (41)         | 0.57 (348)    | 9.76              | 4.31          |
| 2;IPFV;PL;PST;V    | 60.00 (5)         | 2.30 (348)    | 80.00             | 3.74          |
| 2;IMP;POS;SG;V     | 43.99 (316)       | 41.79 (347)   | 61.08             | 57.93         |
| 1;IPFV;PL;PST;V    | 22.22 (9)         | 8.91 (348)    | 66.67             | 64.66         |
| 1;PFV;PST;SG;V     | 1.25 (80)         | 1.15 (348)    | 1.25              | 2.87          |
| 2;FUT;PL;V         | 0.00 (1)          | 1.15 (348)    | 0.00              | 3.74          |
| 1;PRS;SBJV;SG;V    | 26.70 (221)       | 20.17 (347)   | 41.18             | 33.43         |
| 2;IPFV;PST;SG;V    | 0.00 (2)          | 4.02 (348)    | 0.00              | 7.76          |
| ADJ;MASC;PL        | 64.66 (365)       | 60.90 (399)   | 97.26             | 96.49         |
| ADJ;FEM;SG         | 30.13 (385)       | 29.77 (393)   | 84.16             | 83.97         |
| ADJ;MASC;SG        | 59.64 (384)       | 57.96 (402)   | 92.71             | 92.04         |
| ADJ;FEM;PL         | 63.03 (357)       | 61.92 (365)   | 97.20             | 96.71         |

Table 28: The performance of [Artetxe et al. \(2016\)](#)’s model on translating words belonging to a specific morphological category for the Portuguese–Catalan language pair (the grey numbers correspond to the dictionary sizes).

| Morph           | Portuguese–French |               |                   |               |
|-----------------|-------------------|---------------|-------------------|---------------|
|                 | Normal (In vocab) | Normal (+OOV) | Lexeme (In vocab) | Lexeme (+OOV) |
| ALL             | 48.68 (9664)      | 27.39 (22437) | 81.35             | 52.4          |
| N;SG            | 52.98 (2095)      | 51.05 (2188)  | 88.07             | 87.39         |
| N;PL            | 52.96 (1641)      | 49.08 (1960)  | 93.36             | 92.04         |
| 1;COND;PL;V     | 0.00 (10)         | 18.90 (492)   | 40.00             | 65.04         |
| 1;PRS;SBJV;SG;V | 28.79 (323)       | 24.03 (491)   | 44.89             | 37.88         |
| 2;COND;PL;V     | -                 | 0.00 (492)    | -                 | 1.22          |
| 1;COND;SG;V     | 54.09 (159)       | 39.02 (492)   | 89.31             | 82.11         |
| 1;IPFV;PL;PST;V | 0.00 (10)         | 1.42 (492)    | 10.00             | 3.25          |
| 2;PL;PRS;V      | 16.67 (24)        | 1.02 (492)    | 29.17             | 2.03          |
| 1;PRS;SG;V      | 25.00 (264)       | 18.33 (491)   | 38.26             | 29.12         |
| 1;IMP;PL;POS;V  | 20.00 (40)        | 7.13 (491)    | 60.00             | 25.46         |
| 1;FUT;SG;V      | 45.10 (51)        | 38.21 (492)   | 86.27             | 84.55         |
| 2;IMP;PL;POS;V  | 4.48 (67)         | 1.22 (492)    | 8.96              | 4.47          |
| 2;PFV;PST;SG;V  | 0.00 (19)         | 0.81 (491)    | 5.26              | 1.22          |
| 1;PL;PRS;SBJV;V | 21.21 (33)        | 7.13 (491)    | 63.64             | 25.46         |
| 3;PRS;SBJV;SG;V | 28.79 (323)       | 23.94 (493)   | 44.89             | 37.93         |
| 1;PFV;PST;SG;V  | 1.50 (133)        | 1.22 (491)    | 2.26              | 2.44          |
| 2;FUT;SG;V      | 12.50 (8)         | 2.03 (492)    | 25.00             | 7.52          |
| 2;IMP;POS;SG;V  | 41.59 (452)       | 38.09 (491)   | 60.62             | 55.19         |
| 2;PFV;PL;PST;V  | 0.00 (3)          | 1.83 (491)    | 0.00              | 6.92          |
| 3;COND;SG;V     | 50.99 (202)       | 38.87 (494)   | 84.16             | 81.78         |
| 2;FUT;PL;V      | 0.00 (1)          | 3.05 (492)    | 0.00              | 7.11          |
| 2;PRS;SBJV;SG;V | 23.81 (105)       | 13.65 (491)   | 52.38             | 26.88         |
| 3;PL;PRS;SBJV;V | 46.46 (198)       | 32.59 (491)   | 85.35             | 72.71         |
| 2;IPFV;PL;PST;V | 19.51 (41)        | 2.24 (492)    | 31.71             | 3.86          |
| 1;IPFV;PST;SG;V | 57.45 (235)       | 48.58 (492)   | 91.91             | 88.21         |
| 3;FUT;SG;V      | 58.13 (160)       | 38.46 (494)   | 85.00             | 71.05         |
| 3;PRS;SG;V      | 41.37 (452)       | 37.73 (493)   | 61.06             | 55.38         |
| 2;IPFV;PST;SG;V | 0.00 (7)          | 0.81 (492)    | 28.57             | 2.44          |
| 1;FUT;PL;V      | 46.15 (26)        | 29.47 (492)   | 80.77             | 71.54         |
| 3;FUT;PL;V      | 63.41 (82)        | 41.46 (492)   | 93.90             | 91.26         |
| 2;PRS;SG;V      | 28.57 (126)       | 15.27 (491)   | 52.38             | 29.74         |
| 3;COND;PL;V     | 52.59 (116)       | 35.37 (492)   | 78.45             | 78.86         |
| 3;IPFV;PST;SG;V | 57.06 (333)       | 48.38 (494)   | 91.89             | 88.26         |
| 2;PL;PRS;SBJV;V | -                 | 0.61 (491)    | -                 | 1.63          |
| 1;PL;PRS;V      | 32.82 (131)       | 10.77 (492)   | 58.02             | 24.39         |
| 1;PFV;PL;PST;V  | 16.67 (18)        | 5.30 (491)    | 27.78             | 7.94          |
| 3;PFV;PL;PST;V  | 51.85 (324)       | 42.77 (491)   | 91.05             | 93.08         |
| NFIN;V          | 55.72 (463)       | 52.02 (494)   | 90.28             | 86.23         |
| 3;PFV;PST;SG;V  | 36.79 (405)       | 31.44 (493)   | 60.74             | 53.55         |
| 2;COND;SG;V     | 0.00 (5)          | 0.41 (492)    | 40.00             | 3.66          |
| 3;PL;PRS;V      | 55.50 (373)       | 46.84 (491)   | 89.28             | 81.67         |
| 3;IPFV;PL;PST;V | 60.22 (274)       | 47.15 (492)   | 96.35             | 96.75         |
| ADJ;FEM;SG      | 60.00 (500)       | 59.84 (503)   | 95.00             | 95.03         |
| ADJ;MASC;PL     | 59.51 (489)       | 56.70 (522)   | 96.11             | 95.02         |
| ADJ;FEM;PL      | 62.26 (469)       | 61.38 (479)   | 97.44             | 96.87         |
| ADJ;MASC;SG     | 57.93 (511)       | 57.01 (528)   | 91.19             | 91.1          |

Table 29: The performance of [Artetxe et al. \(2016\)](#)’s model on translating words belonging to a specific morphological category for the Portuguese–French language pair (the grey numbers correspond to the dictionary sizes).

| Morph           | Portuguese–Italian |               |                   |               |
|-----------------|--------------------|---------------|-------------------|---------------|
|                 | Normal (In vocab)  | Normal (+OOV) | Lexeme (In vocab) | Lexeme (+OOV) |
| ALL             | 46.92 (8939)       | 25.63 (20757) | 80.24             | 52.6          |
| N;SG            | 55.15 (2069)       | 52.99 (2159)  | 90.91             | 90.64         |
| N;PL            | 50.13 (1598)       | 46.24 (1888)  | 89.55             | 87.29         |
| 3;IPFV;PL;PST;V | 57.77 (251)        | 46.90 (452)   | 97.21             | 98.23         |
| 1;FUT;PL;V      | 23.81 (21)         | 15.71 (452)   | 52.38             | 55.53         |
| 1;IPFV;PL;PST;V | 12.50 (8)          | 15.27 (452)   | 62.50             | 65.04         |
| 2;FUT;SG;V      | 16.67 (6)          | 3.10 (452)    | 33.33             | 13.27         |
| 2;COND;PL;V     | -                  | 0.00 (452)    | -                 | 0.44          |
| 2;IPFV;PL;PST;V | 50.00 (4)          | 1.55 (452)    | 75.00             | 3.32          |
| 3;PL;PRS;V      | 51.16 (346)        | 45.23 (451)   | 88.44             | 77.83         |
| 2;IMP;PL;POS;V  | 0.00 (58)          | 1.11 (452)    | 5.17              | 4.65          |
| 3;IMP;PL;POS;V  | 13.64 (176)        | 9.53 (451)    | 34.66             | 24.83         |
| 3;PL;PRS;SBJV;V | 13.64 (176)        | 9.53 (451)    | 34.66             | 24.83         |
| 2;PFV;PL;PST;V  | 0.00 (5)           | 4.65 (452)    | 20.00             | 10.62         |
| 1;COND;PL;V     | 28.57 (7)          | 15.71 (452)   | 85.71             | 57.96         |
| 3;FUT;SG;V      | 48.53 (136)        | 32.96 (452)   | 86.03             | 74.78         |
| 2;IMP;POS;SG;V  | 46.08 (408)        | 43.24 (451)   | 63.97             | 60.09         |
| 3;PRS;SBJV;SG;V | 19.73 (294)        | 15.30 (451)   | 33.33             | 25.06         |
| 3;PFV;PST;SG;V  | 43.62 (376)        | 38.05 (452)   | 75.00             | 71.9          |
| 1;IMP;PL;POS;V  | 26.92 (26)         | 17.52 (451)   | 69.23             | 72.73         |
| 2;PFV;PST;SG;V  | 0.00 (7)           | 1.33 (452)    | 0.00              | 2.43          |
| 1;PL;PRS;SBJV;V | 26.92 (26)         | 17.52 (451)   | 69.23             | 72.73         |
| 1;PFV;PL;PST;V  | 27.78 (18)         | 3.76 (452)    | 50.00             | 9.73          |
| 3;COND;PL;V     | 23.53 (85)         | 13.05 (452)   | 38.82             | 41.81         |
| 2;COND;SG;V     | 16.67 (6)          | 0.44 (452)    | 33.33             | 1.11          |
| 3;IMP;POS;SG;V  | 19.73 (294)        | 15.30 (451)   | 33.33             | 25.06         |
| NFIN;V          | 54.67 (428)        | 52.43 (452)   | 97.43             | 95.8          |
| 1;FUT;SG;V      | 27.27 (44)         | 21.24 (452)   | 70.45             | 65.49         |
| 1;COND;SG;V     | 29.69 (128)        | 16.81 (452)   | 44.53             | 48.01         |
| 1;IPFV;PST;SG;V | 50.34 (149)        | 43.81 (452)   | 88.59             | 83.19         |
| 2;FUT;PL;V      | 0.00 (1)           | 1.11 (452)    | 0.00              | 7.52          |
| 3;PRS;SG;V      | 46.04 (417)        | 43.24 (451)   | 64.27             | 60.09         |
| 2;PRS;SBJV;SG;V | 17.58 (91)         | 10.42 (451)   | 43.96             | 21.06         |
| 2;PL;PRS;SBJV;V | 0.00 (1)           | 0.67 (451)    | 0.00              | 2.44          |
| 1;PRS;SBJV;SG;V | 19.73 (294)        | 15.30 (451)   | 33.33             | 25.06         |
| 2;PRS;SG;V      | 19.23 (130)        | 7.10 (451)    | 33.85             | 13.3          |
| 3;IPFV;PST;SG;V | 50.97 (310)        | 43.81 (452)   | 88.06             | 83.19         |
| 2;IPFV;PST;SG;V | 40.00 (5)          | 1.77 (452)    | 40.00             | 1.77          |
| 3;FUT;PL;V      | 53.12 (64)         | 30.53 (452)   | 93.75             | 84.07         |
| 3;PFV;PL;PST;V  | 54.97 (302)        | 46.68 (452)   | 94.70             | 96.02         |
| 3;COND;SG;V     | 29.11 (158)        | 16.81 (452)   | 44.30             | 48.01         |
| 2;PL;PRS;V      | 26.47 (34)         | 4.65 (452)    | 52.94             | 16.59         |
| 1;PFV;PST;SG;V  | 0.81 (124)         | 0.88 (452)    | 0.81              | 3.1           |
| 1;PRS;SG;V      | 27.57 (243)        | 21.51 (451)   | 44.86             | 32.15         |
| 1;PL;PRS;V      | 31.48 (108)        | 23.67 (452)   | 81.48             | 71.46         |
| ADJ;MASC;PL     | 61.95 (431)        | 58.41 (464)   | 97.22             | 96.55         |
| ADJ;FEM;PL      | 60.61 (424)        | 60.42 (427)   | 95.52             | 95.55         |
| ADJ;MASC;SG     | 60.49 (448)        | 58.67 (467)   | 92.41             | 91.22         |
| ADJ;FEM;SG      | 61.12 (445)        | 61.12 (445)   | 92.81             | 92.36         |

Table 30: The performance of [Artetxe et al. \(2016\)](#)’s model on translating words belonging to a specific morphological category for the Portuguese–Italian language pair (the grey numbers correspond to the dictionary sizes).

| Portuguese–Spanish |                   |               |                   |               |
|--------------------|-------------------|---------------|-------------------|---------------|
| Morph              | Normal (In vocab) | Normal (+OOV) | Lexeme (In vocab) | Lexeme (+OOV) |
| ALL                | 60.64 (9275)      | 37.32 (22638) | 85.81             | 58.92         |
| N;SG               | 63.92 (1940)      | 61.89 (2015)  | 90.10             | 89.58         |
| N;PL               | 63.71 (1576)      | 60.35 (1816)  | 92.64             | 91.8          |
| ADJ;FEM;SG         | 66.24 (542)       | 65.87 (545)   | 95.02             | 95.05         |
| ADJ;MASC;SG        | 66.67 (543)       | 64.65 (563)   | 94.66             | 94.49         |
| ADJ;MASC;PL        | 69.20 (526)       | 65.83 (559)   | 96.77             | 96.78         |
| ADJ;FEM;PL         | 70.23 (514)       | 69.22 (523)   | 97.28             | 96.94         |
| 2;FUT;PL;V         | 50.00 (4)         | 15.52 (451)   | 75.00             | 35.48         |
| 3;PL;PRS;V         | 59.06 (342)       | 49.78 (450)   | 83.33             | 72.67         |
| 2;PFV;PL;PST;V     | 0.00 (2)          | 0.00 (451)    | 0.00              | 0.44          |
| 3;IPFV;PL;PST;V    | 69.92 (256)       | 55.43 (451)   | 98.83             | 97.56         |
| 3;PFV;PST;SG;V     | 56.67 (360)       | 48.78 (451)   | 80.28             | 74.94         |
| 3;FUT;PL;SBJV;V    | 0.00 (30)         | 0.67 (451)    | 0.00              | 0.67          |
| 2;IMP;POS;SG;V     | 53.92 (408)       | 49.78 (450)   | 68.87             | 63.33         |
| 3;FUT;PL;V         | 78.38 (74)        | 55.88 (451)   | 97.30             | 91.8          |
| 1;COND;SG;V        | 69.19 (198)       | 53.88 (451)   | 91.92             | 84.04         |
| 3;IMP;POS;SG;V     | 48.10 (289)       | 36.83 (448)   | 59.86             | 46.21         |
| 2;IMP;PL;POS;V     | 6.38 (47)         | 6.65 (451)    | 14.89             | 11.75         |
| 2;FUT;PL;SBJV;V    | -                 | 0.22 (451)    | -                 | 0.89          |
| 1;IMP;PL;POS;V     | 50.00 (34)        | 25.00 (448)   | 61.76             | 38.39         |
| 2;FUT;SG;V         | 45.45 (11)        | 27.05 (451)   | 63.64             | 44.79         |
| 3;PFV;PL;PST;V     | 66.44 (298)       | 54.77 (451)   | 95.64             | 93.35         |
| 2;PL;PRS;V         | 13.33 (15)        | 1.77 (451)    | 20.00             | 1.77          |
| 2;COND;SG;V        | 0.00 (5)          | 29.93 (451)   | 40.00             | 54.32         |
| 2;COND;PL;V        | 0.00 (1)          | 1.11 (451)    | 0.00              | 4.66          |
| 2;PRS;SG;V         | 51.64 (122)       | 39.11 (450)   | 61.48             | 49.78         |
| 3;COND;PL;V        | 77.78 (99)        | 54.10 (451)   | 96.97             | 95.57         |
| 2;PRS;SBJV;SG;V    | 46.81 (94)        | 28.95 (449)   | 67.02             | 40.31         |
| 3;IPFV;PST;SG;V    | 69.10 (301)       | 55.88 (451)   | 90.37             | 86.47         |
| 2;FUT;SBJV;SG;V    | 28.57 (7)         | 26.61 (451)   | 28.57             | 32.37         |
| 1;FUT;PL;SBJV;V    | -                 | 0.00 (451)    | -                 | 0.44          |
| 2;IPFV;PST;SG;V    | 14.29 (7)         | 9.31 (451)    | 28.57             | 13.97         |
| 2;PFV;PST;SG;V     | 47.62 (21)        | 26.83 (451)   | 57.14             | 35.7          |
| 1;FUT;SG;V         | 68.75 (48)        | 47.01 (451)   | 89.58             | 75.39         |
| 1;PFV;PST;SG;V     | 28.22 (163)       | 14.63 (451)   | 44.79             | 25.94         |
| 2;PL;PRS;SBJV;V    | 25.00 (4)         | 0.89 (449)    | 50.00             | 3.34          |
| 1;IPFV;PST;SG;V    | 69.10 (301)       | 55.88 (451)   | 90.37             | 86.47         |
| 1;PL;PRS;V         | 67.24 (116)       | 43.24 (451)   | 81.03             | 60.09         |
| 1;FUT;PL;V         | 51.72 (29)        | 47.23 (451)   | 86.21             | 86.25         |
| 3;PRS;SG;V         | 54.15 (410)       | 50.00 (450)   | 69.27             | 63.56         |
| NFIN;V             | 57.78 (424)       | 54.99 (451)   | 91.75             | 88.47         |
| 3;IMP;PL;POS;V     | 46.88 (192)       | 26.95 (449)   | 67.19             | 44.54         |
| 3;PL;PRS;SBJV;V    | 46.88 (192)       | 26.95 (449)   | 67.19             | 44.54         |
| 1;PRS;SBJV;SG;V    | 48.28 (290)       | 36.97 (449)   | 60.00             | 46.33         |
| 1;IPFV;PL;PST;V    | 38.46 (13)        | 23.06 (451)   | 100.00            | 86.03         |
| 3;FUT;SBJV;SG;V    | 67.86 (140)       | 53.88 (451)   | 92.86             | 86.7          |
| 3;COND;SG;V        | 69.19 (198)       | 53.88 (451)   | 91.92             | 84.04         |
| 1;FUT;SBJV;SG;V    | 67.86 (140)       | 53.88 (451)   | 92.86             | 86.7          |
| 3;FUT;SG;V         | 79.73 (148)       | 58.09 (451)   | 97.30             | 93.35         |
| 1;PL;PRS;SBJV;V    | 50.00 (34)        | 24.72 (449)   | 61.76             | 38.08         |
| 1;PRS;SG;V         | 42.62 (237)       | 31.99 (447)   | 54.85             | 40.94         |
| 2;IPFV;PL;PST;V    | 0.00 (2)          | 2.00 (451)    | 50.00             | 2.66          |
| 3;PRS;SBJV;SG;V    | 48.28 (290)       | 36.97 (449)   | 60.00             | 46.33         |
| 1;COND;PL;V        | 87.50 (8)         | 48.12 (451)   | 100.00            | 93.57         |
| 1;PFV;PL;PST;V     | 50.00 (46)        | 22.84 (451)   | 67.39             | 34.37         |

Table 31: The performance of [Artetxe et al. \(2016\)](#)’s model on translating words belonging to a specific morphological category for the Portuguese–Spanish language pair (the grey numbers correspond to the dictionary sizes).



| Morph           | Spanish–Catalan   |               |                   |               |
|-----------------|-------------------|---------------|-------------------|---------------|
|                 | Normal (In vocab) | Normal (+OOV) | Lexeme (In vocab) | Lexeme (+OOV) |
| ALL             | 50.37 (8291)      | 30.43 (18442) | 79.12             | 53.18         |
| N;SG            | 59.43 (1639)      | 58.58 (1666)  | 90.12             | 89.2          |
| N;PL            | 59.73 (1388)      | 56.87 (1542)  | 92.36             | 91.63         |
| ADJ;FEM;SG      | 34.46 (383)       | 34.37 (387)   | 86.68             | 86.82         |
| ADJ;MASC;SG     | 69.19 (383)       | 68.38 (389)   | 94.52             | 94.6          |
| ADJ;FEM;PL      | 71.82 (362)       | 71.04 (366)   | 95.03             | 94.81         |
| ADJ;MASC;PL     | 70.35 (371)       | 67.96 (387)   | 96.23             | 96.12         |
| 1;FUT;PL;V      | 35.90 (39)        | 43.90 (369)   | 64.10             | 88.89         |
| 2;PFV;PST;SG;V  | 0.00 (2)          | 0.00 (369)    | 0.00              | 0             |
| 2;IMP;PL;POS;V  | 2.70 (37)         | 0.54 (369)    | 8.11              | 2.17          |
| 2;PRS;SG;V      | 32.87 (143)       | 20.60 (369)   | 40.56             | 25.47         |
| 2;PST;SBJV;SG;V | 66.67 (3)         | 0.54 (369)    | 66.67             | 1.63          |
| 3;PFV;PL;PST;V  | 55.33 (244)       | 52.03 (369)   | 89.75             | 95.39         |
| 2;PFV;PL;PST;V  | -                 | 0.00 (369)    | -                 | 0.54          |
| 1;PL;PRS;SBJV;V | 31.34 (67)        | 14.63 (369)   | 59.70             | 26.29         |
| 2;COND;PL;V     | 0.00 (3)          | 1.36 (369)    | 0.00              | 3.25          |
| 3;IMP;POS;SG;V  | 22.27 (256)       | 19.78 (369)   | 37.50             | 30.62         |
| 1;PRS;SG;V      | 28.77 (212)       | 23.98 (367)   | 42.45             | 35.15         |
| 1;PL;PRS;V      | 34.59 (133)       | 12.74 (369)   | 53.38             | 19.51         |
| 3;PL;PRS;V      | 45.94 (320)       | 42.82 (369)   | 77.50             | 69.65         |
| 3;IPFV;PST;SG;V | 53.61 (291)       | 48.51 (369)   | 88.32             | 86.99         |
| 1;IPFV;PST;SG;V | 53.61 (291)       | 48.51 (369)   | 88.32             | 86.99         |
| 3;PL;PRS;SBJV;V | 24.63 (203)       | 18.70 (369)   | 41.87             | 35.23         |
| 3;PRS;SG;V      | 52.59 (348)       | 51.22 (369)   | 66.38             | 62.6          |
| 2;IPFV;PST;SG;V | 0.00 (7)          | 5.15 (369)    | 0.00              | 7.59          |
| 3;FUT;SG;V      | 60.43 (187)       | 52.03 (369)   | 89.84             | 94.04         |
| 3;COND;PL;V     | 53.79 (132)       | 50.41 (369)   | 75.00             | 94.85         |
| 3;COND;SG;V     | 56.72 (201)       | 42.55 (369)   | 81.59             | 76.15         |
| 2;PL;PST;SBJV;V | -                 | 0.00 (369)    | -                 | 2.71          |
| 2;FUT;PL;V      | 0.00 (6)          | 1.63 (369)    | 0.00              | 2.17          |
| 3;PST;SBJV;SG;V | 48.80 (166)       | 32.79 (369)   | 66.27             | 52.57         |
| 1;PL;PST;SBJV;V | 33.33 (3)         | 1.36 (369)    | 33.33             | 7.59          |
| 3;FUT;PL;V      | 49.64 (139)       | 45.26 (369)   | 74.82             | 87.8          |
| 3;IMP;PL;POS;V  | 24.63 (203)       | 18.70 (369)   | 41.87             | 35.23         |
| 2;COND;SG;V     | 0.00 (3)          | 2.17 (369)    | 0.00              | 2.98          |
| 1;PRS;SBJV;SG;V | 22.27 (256)       | 19.78 (369)   | 37.50             | 30.62         |
| 1;PFV;PL;PST;V  | 33.33 (6)         | 10.57 (369)   | 50.00             | 16.26         |
| 2;IPFV;PL;PST;V | 0.00 (2)          | 0.54 (369)    | 0.00              | 1.08          |
| 1;IMP;PL;POS;V  | 31.34 (67)        | 14.63 (369)   | 59.70             | 26.29         |
| 2;PL;PRS;SBJV;V | 25.00 (16)        | 4.61 (369)    | 43.75             | 10.03         |
| 2;PL;PRS;V      | 5.00 (20)         | 1.90 (369)    | 25.00             | 4.88          |
| 1;PFV;PST;SG;V  | 0.00 (71)         | 1.90 (369)    | 1.41              | 3.25          |
| 1;FUT;SG;V      | 37.50 (40)        | 47.70 (369)   | 52.50             | 76.69         |
| 1;COND;PL;V     | 42.86 (7)         | 37.13 (369)   | 71.43             | 85.91         |
| 3;IPFV;PL;PST;V | 56.08 (255)       | 49.86 (369)   | 94.12             | 96.48         |
| 1;IPFV;PL;PST;V | 25.00 (4)         | 18.70 (369)   | 75.00             | 76.69         |
| 3;PRS;SBJV;SG;V | 22.27 (256)       | 19.78 (369)   | 37.50             | 30.62         |
| 3;PL;PST;SBJV;V | 67.23 (119)       | 41.19 (369)   | 97.48             | 94.58         |
| 1;PST;SBJV;SG;V | 48.80 (166)       | 32.79 (369)   | 66.27             | 52.57         |
| 2;FUT;SG;V      | 16.67 (12)        | 23.58 (369)   | 41.67             | 39.3          |
| 1;COND;SG;V     | 56.72 (201)       | 42.55 (369)   | 81.59             | 76.15         |
| 3;PFV;PST;SG;V  | 45.24 (294)       | 40.38 (369)   | 67.69             | 63.41         |
| 2;IMP;POS;SG;V  | 52.46 (345)       | 50.68 (369)   | 66.09             | 61.79         |
| 2;PRS;SBJV;SG;V | 19.77 (86)        | 8.67 (369)    | 22.09             | 11.92         |
| NFIN;V          | 55.03 (358)       | 53.93 (369)   | 91.90             | 88.89         |

Table 32: The performance of [Artetxe et al. \(2016\)](#)’s model on translating words belonging to a specific morphological category for the Spanish–Catalan language pair (the grey numbers correspond to the dictionary sizes).



| Morph           | Spanish–French    |               |                   |               |
|-----------------|-------------------|---------------|-------------------|---------------|
|                 | Normal (In vocab) | Normal (+OOV) | Lexeme (In vocab) | Lexeme (+OOV) |
| ALL             | 46.87 (11457)     | 25.84 (25775) | 78.62             | 49.5          |
| N;PL            | 55.83 (1886)      | 52.17 (2162)  | 94.17             | 92.92         |
| N;SG            | 56.32 (2301)      | 55.19 (2352)  | 89.35             | 89.03         |
| 3;PRS;SBJV;SG;V | 28.80 (382)       | 22.22 (513)   | 45.55             | 35.09         |
| 2;IMP;PL;POS;V  | 2.27 (44)         | 1.17 (513)    | 6.82              | 4.48          |
| 2;PRS;SBJV;SG;V | 27.47 (182)       | 15.20 (513)   | 45.05             | 24.76         |
| 1;FUT;PL;V      | 30.19 (53)        | 28.65 (513)   | 62.26             | 76.22         |
| 1;PFV;PST;SG;V  | 0.91 (110)        | 1.36 (513)    | 1.82              | 2.73          |
| 2;IPFV;PL;PST;V | 0.00 (1)          | 0.19 (513)    | 0.00              | 0.97          |
| 1;PFV;PL;PST;V  | 20.00 (60)        | 11.31 (513)   | 53.33             | 28.27         |
| 1;PL;PRS;SBJV;V | 16.18 (68)        | 9.16 (513)    | 41.18             | 26.71         |
| 2;IPFV;PST;SG;V | 13.33 (15)        | 5.26 (513)    | 20.00             | 11.89         |
| 3;PL;PRS;SBJV;V | 42.96 (291)       | 29.24 (513)   | 77.66             | 61.4          |
| 2;PL;PRS;SBJV;V | 0.00 (12)         | 1.75 (513)    | 0.00              | 5.07          |
| 3;PRS;SG;V      | 37.81 (484)       | 35.48 (513)   | 59.30             | 54.39         |
| 3;PFV;PST;SG;V  | 34.53 (417)       | 28.85 (513)   | 54.68             | 45.03         |
| 2;PL;PST;SBJV;V | -                 | 0.39 (513)    | -                 | 3.51          |
| 2;PL;PRS;V      | 0.00 (27)         | 6.04 (513)    | 18.52             | 15.01         |
| 2;PFV;PL;PST;V  | -                 | 0.39 (513)    | -                 | 1.36          |
| 2;COND;SG;V     | 0.00 (9)          | 3.12 (513)    | 22.22             | 10.92         |
| 2;COND;PL;V     | -                 | 4.09 (513)    | -                 | 16.57         |
| 3;PST;SBJV;SG;V | 10.39 (154)       | 15.01 (513)   | 24.03             | 34.7          |
| 1;PRS;SBJV;SG;V | 28.80 (382)       | 22.22 (513)   | 45.55             | 35.09         |
| 2;FUT;PL;V      | 20.00 (5)         | 10.72 (513)   | 40.00             | 24.76         |
| 1;PRS;SG;V      | 24.44 (360)       | 20.35 (511)   | 39.72             | 30.33         |
| 1;IPFV;PL;PST;V | 0.00 (15)         | 0.78 (513)    | 6.67              | 5.85          |
| 2;IMP;POS;SG;V  | 37.61 (476)       | 34.70 (513)   | 59.03             | 53.22         |
| 3;COND;SG;V     | 47.39 (249)       | 38.21 (513)   | 81.93             | 85.38         |
| 2;FUT;SG;V      | 16.67 (24)        | 3.31 (513)    | 20.83             | 8.77          |
| 3;FUT;SG;V      | 46.72 (244)       | 35.09 (513)   | 82.79             | 76.02         |
| 1;IPFV;PST;SG;V | 53.76 (266)       | 45.03 (513)   | 90.98             | 84.6          |
| 3;FUT;PL;V      | 55.03 (169)       | 38.99 (513)   | 91.72             | 97.47         |
| 2;PFV;PST;SG;V  | 2.04 (49)         | 0.58 (513)    | 6.12              | 0.58          |
| 3;IPFV;PST;SG;V | 52.97 (387)       | 45.03 (513)   | 89.92             | 84.6          |
| 2;PST;SBJV;SG;V | 0.00 (3)          | 0.00 (513)    | 0.00              | 1.75          |
| 3;PL;PRS;V      | 49.19 (431)       | 42.50 (513)   | 86.08             | 76.61         |
| 1;COND;SG;V     | 47.69 (195)       | 38.21 (513)   | 83.08             | 85.38         |
| 1;PL;PRS;V      | 25.15 (167)       | 12.67 (513)   | 52.69             | 31.58         |
| 1;PL;PST;SBJV;V | 0.00 (1)          | 0.00 (513)    | 0.00              | 0             |
| 3;COND;PL;V     | 43.20 (169)       | 37.82 (513)   | 81.66             | 86.35         |
| 3;PFV;PL;PST;V  | 44.92 (354)       | 39.96 (513)   | 91.53             | 93.37         |
| 1;IMP;PL;POS;V  | 18.29 (82)        | 9.16 (513)    | 46.34             | 26.71         |
| NFIN;V          | 52.00 (475)       | 48.54 (513)   | 93.26             | 88.3          |
| 1;PST;SBJV;SG;V | 8.70 (92)         | 15.01 (513)   | 18.48             | 34.7          |
| 2;PRS;SG;V      | 25.76 (198)       | 16.18 (513)   | 46.97             | 32.75         |
| 1;COND;PL;V     | 12.50 (8)         | 10.53 (513)   | 12.50             | 39.77         |
| 3;PL;PST;SBJV;V | 0.00 (86)         | 0.00 (513)    | 0.00              | 0.39          |
| 3;IPFV;PL;PST;V | 50.75 (333)       | 42.88 (513)   | 95.20             | 96.69         |
| 1;FUT;SG;V      | 47.22 (72)        | 29.63 (513)   | 79.17             | 67.06         |
| ADJ;FEM;PL      | 66.21 (506)       | 65.75 (511)   | 97.83             | 97.26         |
| ADJ;MASC;PL     | 66.02 (515)       | 64.43 (537)   | 95.53             | 95.34         |
| ADJ;FEM;SG      | 62.38 (529)       | 62.03 (532)   | 95.09             | 95.11         |
| ADJ;MASC;SG     | 65.16 (531)       | 64.33 (541)   | 93.03             | 92.98         |

Table 33: The performance of Artetxe et al. (2016)’s model on translating words belonging to a specific morphological category for the Spanish–French language pair (the grey numbers correspond to the dictionary sizes).

| Morph           | Spanish–Italian   |               |                   |               |
|-----------------|-------------------|---------------|-------------------|---------------|
|                 | Normal (In vocab) | Normal (+OOV) | Lexeme (In vocab) | Lexeme (+OOV) |
| ALL             | 46.99 (10709)     | 27.79 (23528) | 78.26             | 53.66         |
| N;SG            | 57.22 (2319)      | 56.11 (2365)  | 92.07             | 91.63         |
| N;PL            | 48.98 (1805)      | 45.70 (2103)  | 86.59             | 84.88         |
| ADJ;MASC;SG     | 68.91 (476)       | 68.46 (482)   | 93.28             | 93.57         |
| ADJ;FEM;PL      | 68.99 (445)       | 68.82 (449)   | 95.73             | 95.77         |
| ADJ;MASC;PL     | 67.46 (461)       | 67.30 (477)   | 95.23             | 95.39         |
| ADJ;FEM;SG      | 69.36 (470)       | 69.36 (470)   | 95.53             | 95.53         |
| 2;IMP;PL;POS;V  | 3.17 (63)         | 1.28 (470)    | 12.7              | 5.96          |
| 1;PST;SBJV;SG;V | 60.00 (90)        | 42.89 (457)   | 88.89             | 75.71         |
| 1;FUT;PL;V      | 22.45 (49)        | 15.75 (457)   | 48.98             | 50.77         |
| 2;PFV;PST;SG;V  | 0.00 (19)         | 0.22 (457)    | 0                 | 1.09          |
| NFIN;V          | 57.14 (441)       | 54.66 (472)   | 95.69             | 93.86         |
| 3;PRS;SBJV;SG;V | 18.52 (324)       | 14.85 (458)   | 29.63             | 23.36         |
| 1;PL;PRS;SBJV;V | 32.50 (80)        | 23.63 (457)   | 80                | 78.12         |
| 2;FUT;SG;V      | 22.58 (31)        | 9.41 (457)    | 35.48             | 26.7          |
| 3;PFV;PST;SG;V  | 42.78 (367)       | 38.21 (458)   | 72.21             | 67.9          |
| 2;PL;PST;SBJV;V | 0.00 (1)          | 0.44 (457)    | 0                 | 1.75          |
| 3;IPFV;PST;SG;V | 54.60 (337)       | 47.16 (458)   | 88.72             | 83.19         |
| 2;IPFV;PL;PST;V | 0.00 (1)          | 2.41 (457)    | 0                 | 4.38          |
| 1;FUT;SG;V      | 28.36 (67)        | 22.32 (457)   | 64.18             | 56.02         |
| 3;COND;PL;V     | 16.10 (118)       | 16.19 (457)   | 33.05             | 47.48         |
| 1;IPFV;PL;PST;V | 20.00 (15)        | 26.70 (457)   | 93.33             | 85.56         |
| 3;PL;PRS;V      | 50.27 (368)       | 45.73 (457)   | 82.88             | 74.18         |
| 3;PST;SBJV;SG;V | 53.11 (177)       | 42.79 (458)   | 83.62             | 75.55         |
| 2;FUT;PL;V      | 0.00 (6)          | 2.84 (457)    | 0                 | 11.6          |
| 1;COND;SG;V     | 14.65 (157)       | 16.63 (457)   | 38.22             | 46.61         |
| 2;PL;PRS;V      | 11.11 (27)        | 1.31 (457)    | 14.81             | 3.28          |
| 2;PST;SBJV;SG;V | 0.00 (4)          | 3.06 (457)    | 0                 | 5.69          |
| 1;COND;PL;V     | 25.00 (12)        | 21.88 (457)   | 58.33             | 75.93         |
| 3;PFV;PL;PST;V  | 55.27 (313)       | 49.02 (457)   | 95.53             | 95.84         |
| 1;PRS;SBJV;SG;V | 18.52 (324)       | 14.88 (457)   | 29.63             | 23.41         |
| 3;IMP;PL;POS;V  | 17.21 (244)       | 12.91 (457)   | 28.69             | 24.07         |
| 2;PRS;SG;V      | 12.75 (204)       | 7.44 (457)    | 25                | 12.25         |
| 2;PRS;SBJV;SG;V | 17.78 (180)       | 12.91 (457)   | 39.44             | 26.48         |
| 3;IMP;POS;SG;V  | 18.52 (324)       | 14.88 (457)   | 29.63             | 23.41         |
| 1;IMP;PL;POS;V  | 32.10 (81)        | 22.93 (471)   | 79.01             | 78.13         |
| 2;COND;PL;V     | 0.00 (1)          | 0.44 (457)    | 0                 | 3.28          |
| 2;IMP;POS;SG;V  | 45.97 (409)       | 41.40 (471)   | 68.7              | 61.78         |
| 2;COND;SG;V     | 12.50 (8)         | 0.66 (457)    | 25                | 2.41          |
| 2;PL;PRS;SBJV;V | 0.00 (13)         | 0.22 (457)    | 0                 | 0.22          |
| 2;IPFV;PST;SG;V | 0.00 (16)         | 1.09 (457)    | 0                 | 1.53          |
| 3;COND;SG;V     | 14.97 (187)       | 16.59 (458)   | 37.43             | 46.72         |
| 3;IPFV;PL;PST;V | 55.59 (304)       | 49.02 (457)   | 97.04             | 97.81         |
| 2;PFV;PL;PST;V  | 0.00 (2)          | 3.72 (457)    | 0                 | 5.47          |
| 3;PL;PRS;SBJV;V | 17.21 (244)       | 12.91 (457)   | 28.69             | 24.07         |
| 1;PL;PRS;V      | 35.44 (158)       | 27.57 (457)   | 82.28             | 79.43         |
| 3;FUT;PL;V      | 44.83 (145)       | 34.57 (457)   | 91.72             | 95.19         |
| 3;FUT;SG;V      | 44.39 (223)       | 38.43 (458)   | 88.79             | 84.28         |
| 3;PRS;SG;V      | 45.93 (418)       | 43.23 (458)   | 68.9              | 63.97         |
| 1;PFV;PST;SG;V  | 0.00 (112)        | 3.50 (457)    | 3.57              | 6.56          |
| 1;PL;PST;SBJV;V | 0.00 (2)          | 1.97 (457)    | 50                | 5.25          |
| 1;IPFV;PST;SG;V | 61.38 (145)       | 47.26 (457)   | 91.72             | 83.15         |
| 1;PFV;PL;PST;V  | 33.33 (48)        | 24.73 (457)   | 72.92             | 70.02         |
| 1;PRS;SG;V      | 29.55 (291)       | 23.19 (457)   | 45.7              | 34.79         |
| 3;PL;PST;SBJV;V | 52.10 (119)       | 42.67 (457)   | 96.64             | 96.06         |

Table 34: The performance of [Artetxe et al. \(2016\)](#)’s model on translating words belonging to a specific morphological category for the Spanish–Italian language pair (the grey numbers correspond to the dictionary sizes).

| Spanish–Portuguese |                   |               |                   |               |
|--------------------|-------------------|---------------|-------------------|---------------|
| Morph              | Normal (In vocab) | Normal (+OOV) | Lexeme (In vocab) | Lexeme (+OOV) |
| ALL                | 57.45 (9732)      | 35.62 (23197) | 82.27             | 56.27         |
| N;SG               | 63.84 (2066)      | 62.47 (2113)  | 90.17             | 89.68         |
| N;PL               | 61.64 (1692)      | 58.56 (1904)  | 92.32             | 92.7          |
| ADJ;FEM;PL         | 73.80 (439)       | 73.20 (444)   | 99.32             | 99.32         |
| ADJ;MASC;PL        | 73.21 (448)       | 71.95 (467)   | 97.77             | 98.07         |
| ADJ;FEM;SG         | 72.81 (456)       | 72.33 (459)   | 96.93             | 96.08         |
| ADJ;MASC;SG        | 72.98 (459)       | 71.91 (470)   | 96.30             | 95.74         |
| 1;PL;PRS;SBJV;V    | 18.87 (53)        | 21.08 (465)   | 35.85             | 38.49         |
| 3;PFV;PST;SG;V     | 58.63 (365)       | 50.32 (465)   | 81.37             | 72.9          |
| 3;PRS;SBJV;SG;V    | 42.26 (310)       | 34.70 (464)   | 54.19             | 45.04         |
| 3;FUT;PL;V         | 50.00 (114)       | 46.45 (465)   | 68.42             | 89.25         |
| 2;PL;PRS;V         | 6.67 (15)         | 0.43 (465)    | 6.67              | 0.43          |
| 3;COND;PL;V        | 61.94 (134)       | 46.67 (465)   | 84.33             | 87.1          |
| 1;IPFV;PL;PST;V    | 50.00 (8)         | 24.30 (465)   | 87.50             | 89.68         |
| 2;FUT;PL;SBJV;V    | -                 | 0.00 (465)    | -                 | 0.43          |
| 2;IMP;PL;POS;V     | 0.00 (36)         | 2.80 (465)    | 2.78              | 3.87          |
| 2;PRS;SBJV;SG;V    | 29.27 (123)       | 26.29 (464)   | 42.28             | 35.78         |
| 1;COND;SG;V        | 54.17 (216)       | 38.71 (465)   | 74.54             | 56.77         |
| 3;IMP;PL;POS;V     | 39.47 (228)       | 30.17 (464)   | 57.89             | 48.49         |
| 3;IMP;POS;SG;V     | 42.26 (310)       | 34.70 (464)   | 54.19             | 45.04         |
| 3;IPFV;PST;SG;V    | 56.18 (340)       | 50.54 (465)   | 82.65             | 83.23         |
| 2;PRS;SG;V         | 37.21 (172)       | 36.64 (464)   | 48.26             | 44.83         |
| 2;IPFV;PST;SG;V    | 22.22 (9)         | 14.41 (465)   | 44.44             | 19.78         |
| 1;COND;PL;V        | 72.73 (11)        | 45.38 (465)   | 72.73             | 83.23         |
| 1;FUT;PL;SBJV;V    | -                 | 5.16 (465)    | -                 | 12.04         |
| 3;FUT;PL;SBJV;V    | 42.86 (7)         | 12.26 (465)   | 42.86             | 20            |
| 2;FUT;PL;V         | 0.00 (2)          | 0.00 (465)    | 0.00              | 0             |
| 3;FUT;SBJV;SG;V    | 30.23 (43)        | 20.43 (465)   | 34.88             | 26.67         |
| NFIN;V             | 60.05 (433)       | 57.63 (465)   | 90.76             | 86.67         |
| 2;IPFV;PL;PST;V    | -                 | 0.22 (465)    | -                 | 0.22          |
| 2;PFV;PL;PST;V     | -                 | 0.86 (465)    | -                 | 1.29          |
| 2;FUT;SG;V         | 37.50 (16)        | 21.94 (465)   | 37.50             | 40.22         |
| 3;COND;SG;V        | 54.17 (216)       | 38.71 (465)   | 74.54             | 56.77         |
| 2;IMP;POS;SG;V     | 51.67 (418)       | 48.06 (464)   | 69.38             | 62.93         |
| 3;PFV;PL;PST;V     | 62.18 (312)       | 53.12 (465)   | 94.55             | 93.98         |
| 1;PFV;PL;PST;V     | 56.79 (81)        | 41.72 (465)   | 69.14             | 57.63         |
| 3;PL;PRS;V         | 57.98 (376)       | 50.43 (464)   | 83.78             | 75            |
| 1;PL;PRS;V         | 62.09 (153)       | 41.94 (465)   | 75.16             | 59.57         |
| 1;FUT;SG;V         | 46.03 (63)        | 48.82 (465)   | 63.49             | 83.44         |
| 3;PL;PRS;SBJV;V    | 39.47 (228)       | 30.17 (464)   | 57.89             | 48.49         |
| 3;PRS;SG;V         | 52.25 (423)       | 49.14 (464)   | 69.74             | 64.01         |
| 2;FUT;SBJV;SG;V    | 75.00 (4)         | 26.45 (465)   | 75.00             | 32.69         |
| 1;FUT;SBJV;SG;V    | 30.23 (43)        | 20.43 (465)   | 34.88             | 26.67         |
| 2;PFV;PST;SG;V     | 33.33 (30)        | 26.24 (465)   | 40.00             | 33.12         |
| 2;COND;SG;V        | 0.00 (4)          | 18.06 (465)   | 25.00             | 32.04         |
| 1;PRS;SBJV;SG;V    | 42.26 (310)       | 34.70 (464)   | 54.19             | 45.04         |
| 2;PL;PRS;SBJV;V    | 0.00 (3)          | 0.43 (465)    | 0.00              | 0.86          |
| 3;FUT;SG;V         | 59.16 (191)       | 53.55 (465)   | 83.25             | 92.47         |
| 1;IMP;PL;POS;V     | 18.87 (53)        | 21.08 (465)   | 35.85             | 38.49         |
| 1;IPFV;PST;SG;V    | 56.18 (340)       | 50.54 (465)   | 82.65             | 83.23         |
| 1;PRS;SG;V         | 39.79 (284)       | 34.99 (463)   | 51.06             | 45.57         |
| 2;COND;PL;V        | -                 | 0.00 (465)    | -                 | 0.22          |
| 1;PFV;PST;SG;V     | 35.66 (143)       | 17.63 (465)   | 55.24             | 26.88         |
| 3;IPFV;PL;PST;V    | 59.61 (307)       | 52.26 (465)   | 93.49             | 97.85         |
| 1;FUT;PL;V         | 42.11 (38)        | 44.30 (465)   | 50.00             | 81.29         |

Table 35: The performance of [Artetxe et al. \(2016\)](#)’s model on translating words belonging to a specific morphological category for the Spanish–Portuguese language pair (the grey numbers correspond to the dictionary sizes).

| Russian–Czech        |                   |               |                   |               |
|----------------------|-------------------|---------------|-------------------|---------------|
| Morph                | Normal (In vocab) | Normal (+OOV) | Lexeme (In vocab) | Lexeme (+OOV) |
| ALL                  | 32.03 (5708)      | 26.48 (7538)  | 79.54             | 75.7          |
| INS;N;PL             | 30.03 (373)       | 23.46 (537)   | 87.13             | 85.1          |
| DAT;N;SG             | 19.69 (457)       | 17.15 (554)   | 56.89             | 50.72         |
| ESS;N;PL             | 40.79 (304)       | 29.80 (537)   | 89.47             | 89.39         |
| ACC;N;SG             | 32.08 (533)       | 30.52 (557)   | 70.92             | 67.5          |
| N;NOM;PL             | 31.29 (489)       | 28.81 (531)   | 77.51             | 74.39         |
| DAT;N;PL             | 43.87 (269)       | 29.98 (537)   | 92.94             | 92.36         |
| ACC;N;PL             | 27.31 (271)       | 24.50 (302)   | 74.91             | 72.19         |
| GEN;N;SG             | 29.53 (535)       | 28.42 (556)   | 73.27             | 69.78         |
| INS;N;SG             | 32.38 (488)       | 29.08 (557)   | 80.53             | 78.28         |
| ESS;N;SG             | 25.54 (466)       | 22.08 (557)   | 61.16             | 56.01         |
| GEN;N;PL             | 34.97 (449)       | 30.11 (538)   | 77.28             | 71.93         |
| N;NOM;SG             | 32.90 (541)       | 31.76 (551)   | 73.01             | 69.87         |
| ACC;ADJ;INAN;MASC;SG | 41.58 (101)       | 40.00 (105)   | 98.02             | 98.1          |
| ADJ;GEN;PL           | 42.11 (95)        | 38.39 (112)   | 100               | 100           |
| ACC;ADJ;NEUT;SG      | 36.00 (100)       | 34.82 (112)   | 93                | 91.96         |
| ADJ;FEM;NOM;SG       | 46.32 (95)        | 41.90 (105)   | 97.89             | 98.1          |
| ADJ;DAT;FEM;SG       | 35.24 (105)       | 33.04 (112)   | 87.62             | 85.71         |
| ADJ;NEUT;NOM;SG      | 38.30 (94)        | 37.14 (105)   | 94.68             | 93.33         |
| ADJ;MASC;NOM;SG      | 41.58 (101)       | 40.00 (105)   | 98.02             | 98.1          |
| ADJ;DAT;PL           | 45.26 (95)        | 39.29 (112)   | 100               | 100           |
| ADJ;INS;PL           | 46.34 (82)        | 35.71 (112)   | 100               | 100           |
| ADJ;ESS;PL           | 42.11 (95)        | 38.39 (112)   | 100               | 100           |
| ACC;ADJ;FEM;SG       | 39.80 (98)        | 34.82 (112)   | 98.98             | 97.32         |
| ADJ;GEN;MASC;SG      | 44.12 (102)       | 41.07 (112)   | 100               | 100           |
| ADJ;GEN;NEUT;SG      | 44.12 (102)       | 41.07 (112)   | 100               | 100           |
| ADJ;ESS;NEUT;SG      | 53.49 (86)        | 46.43 (112)   | 96.51             | 94.64         |
| ADJ;INS;MASC;SG      | 45.26 (95)        | 39.29 (112)   | 100               | 100           |
| ADJ;DAT;MASC;SG      | 49.28 (69)        | 42.86 (112)   | 100               | 100           |
| ADJ;ESS;MASC;SG      | 53.57 (84)        | 46.43 (112)   | 97.62             | 94.64         |
| ACC;ADJ;MASC;SG      | 44.12 (102)       | 41.07 (112)   | 100               | 100           |
| ADJ;ESS;FEM;SG       | 35.24 (105)       | 33.04 (112)   | 87.62             | 85.71         |
| ADJ;DAT;NEUT;SG      | 49.28 (69)        | 42.86 (112)   | 100               | 100           |
| ADJ;FEM;GEN;SG       | 35.24 (105)       | 33.04 (112)   | 87.62             | 85.71         |
| 3;MASC;PL;PST;V      | 25.35 (71)        | 23.16 (95)    | 87.32             | 87.37         |
| 2;PL;PRS;V           | 13.33 (15)        | 10.17 (59)    | 93.33             | 84.75         |
| 1;PL;PRS;V           | 20.00 (15)        | 8.47 (59)     | 86.67             | 61.02         |
| 3;FEM;PST;SG;V       | 27.54 (69)        | 23.16 (95)    | 88.41             | 84.21         |
| 2;IMP;SG;V           | 12.50 (16)        | 1.06 (94)     | 37.5              | 13.83         |
| 3;FEM;PL;PST;V       | 26.15 (65)        | 23.16 (95)    | 87.69             | 87.37         |
| 3;NEUT;PST;SG;V      | 22.22 (45)        | 14.74 (95)    | 82.22             | 74.74         |
| 2;PRS;SG;V           | 28.57 (7)         | 8.47 (59)     | 57.14             | 55.93         |
| 2;IMP;PL;V           | 5.88 (17)         | 7.45 (94)     | 70.59             | 64.89         |
| 1;PRS;SG;V           | 23.81 (21)        | 11.86 (59)    | 52.38             | 32.2          |
| 3;PL;PRS;V           | 16.28 (43)        | 13.56 (59)    | 81.4              | 69.49         |
| NFIN;V               | 25.64 (117)       | 24.00 (125)   | 100               | 98.4          |
| 3;MASC;PST;SG;V      | 27.71 (83)        | 24.73 (93)    | 84.34             | 77.42         |
| 3;PRS;SG;V           | 18.52 (54)        | 16.95 (59)    | 79.63             | 76.27         |
| 2;FUT;PL;V           | 0.00 (4)          | 10.81 (37)    | 75                | 70.27         |
| 2;FUT;SG;V           | 0.00 (1)          | 2.70 (37)     | 100               | 43.24         |
| 1;FUT;PL;V           | 20.00 (5)         | 5.41 (37)     | 80                | 21.62         |
| 1;FUT;SG;V           | 14.29 (7)         | 2.70 (37)     | 14.29             | 13.51         |
| 3;FUT;SG;V           | 10.71 (28)        | 8.11 (37)     | 35.71             | 35.14         |
| 3;FUT;PL;V           | 9.09 (22)         | 5.41 (37)     | 31.82             | 32.43         |
| ACC;INAN;N;SG        | 0.00 (1)          | 0.00 (2)      | 0                 | 50            |
| ACC;INAN;N;PL        | 0.00 (1)          | 50.00 (2)     | 100               | 100           |
| ADJ;INS;NEUT;SG      | 33.33 (9)         | 25.00 (12)    | 100               | 100           |
| ADJ;FEM;INS;SG       | 18.18 (11)        | 16.67 (12)    | 90.91             | 91.67         |
| ACC;ADJ;PL           | 36.36 (11)        | 33.33 (12)    | 100               | 100           |
| ADJ;NOM;PL           | 10.00 (10)        | 16.67 (12)    | 100               | 100           |
| 2;FEM;PL;PST;V       | 0.00 (1)          | 0.00 (1)      | 0                 | 0             |
| 2;MASC;PL;PST;V      | 0.00 (1)          | 0.00 (1)      | 0                 | 0             |

Table 36: The performance of [Artetxe et al. \(2016\)](#)’s model on translating words belonging to a specific morphological category for the Russian–Czech language pair (the grey numbers correspond to the dictionary sizes).

| Russian–Polish       |                   |               |                   |               |
|----------------------|-------------------|---------------|-------------------|---------------|
| Morph                | Normal (In vocab) | Normal (+OOV) | Lexeme (In vocab) | Lexeme (+OOV) |
| ALL                  | 40.22 (9183)      | 35.01 (11697) | 83.10             | 80.45         |
| DAT;N;SG             | 29.86 (653)       | 24.92 (999)   | 62.17             | 58.86         |
| INS;N;SG             | 39.70 (879)       | 35.40 (1000)  | 86.01             | 82.9          |
| ACC;N;SG             | 38.20 (953)       | 36.20 (1000)  | 73.66             | 71.2          |
| GEN;N;SG             | 40.62 (960)       | 39.20 (1000)  | 81.46             | 79.2          |
| ESS;N;SG             | 32.86 (782)       | 28.56 (998)   | 64.07             | 56.71         |
| N;NOM;SG             | 36.99 (976)       | 36.15 (993)   | 71.72             | 69.89         |
| INS;N;PL             | 43.38 (634)       | 34.84 (930)   | 98.90             | 99.14         |
| GEN;N;PL             | 41.24 (805)       | 36.64 (928)   | 78.39             | 73.06         |
| DAT;N;PL             | 43.85 (358)       | 32.04 (930)   | 88.27             | 90.22         |
| ESS;N;PL             | 47.50 (541)       | 35.48 (930)   | 91.31             | 89.35         |
| ACC;N;PL             | 38.00 (579)       | 35.23 (633)   | 80.83             | 77.41         |
| N;NOM;PL             | 39.86 (863)       | 37.81 (923)   | 84.36             | 81.69         |
| ACC;ADJ;INAN;MASC;SG | 48.63 (183)       | 47.89 (190)   | 94.54             | 94.21         |
| ADJ;GEN;PL           | 50.00 (180)       | 47.37 (190)   | 98.33             | 98.42         |
| ADJ;DAT;PL           | 45.00 (180)       | 43.16 (190)   | 93.89             | 94.74         |
| ADJ;FEM;GEN;SG       | 45.00 (180)       | 43.68 (190)   | 93.89             | 94.21         |
| ADJ;ESS;NEUT;SG      | 42.51 (167)       | 40.00 (190)   | 91.62             | 91.05         |
| ACC;ADJ;NEUT;SG      | 41.90 (179)       | 40.53 (190)   | 92.74             | 92.63         |
| ADJ;DAT;MASC;SG      | 50.44 (113)       | 41.58 (190)   | 99.12             | 99.47         |
| ADJ;INS;NEUT;SG      | 45.00 (180)       | 43.16 (190)   | 93.89             | 94.74         |
| ACC;ADJ;MASC;SG      | 44.02 (184)       | 43.16 (190)   | 96.20             | 96.32         |
| ADJ;GEN;MASC;SG      | 44.02 (184)       | 43.16 (190)   | 96.20             | 96.32         |
| ADJ;GEN;NEUT;SG      | 44.02 (184)       | 43.16 (190)   | 96.20             | 96.32         |
| ADJ;ESS;FEM;SG       | 45.00 (180)       | 43.68 (190)   | 93.89             | 94.21         |
| ADJ;NEUT;NOM;SG      | 41.90 (179)       | 40.53 (190)   | 92.74             | 92.63         |
| ADJ;INS;MASC;SG      | 45.00 (180)       | 43.16 (190)   | 93.89             | 94.74         |
| ADJ;FEM;NOM;SG       | 46.45 (183)       | 45.26 (190)   | 96.72             | 96.84         |
| ADJ;MASC;NOM;SG      | 48.63 (183)       | 47.89 (190)   | 94.54             | 94.21         |
| ADJ;DAT;FEM;SG       | 45.00 (180)       | 43.68 (190)   | 93.89             | 94.21         |
| ADJ;ESS;PL           | 50.00 (180)       | 47.37 (190)   | 98.33             | 98.42         |
| ACC;ADJ;FEM;SG       | 45.56 (169)       | 41.58 (190)   | 99.41             | 98.95         |
| ADJ;FEM;INS;SG       | 45.76 (177)       | 43.68 (190)   | 94.35             | 94.21         |
| ADJ;INS;PL           | 45.12 (164)       | 42.11 (190)   | 100.00            | 100           |
| ADJ;ESS;MASC;SG      | 42.51 (167)       | 40.00 (190)   | 91.62             | 91.05         |
| ADJ;DAT;NEUT;SG      | 50.44 (113)       | 41.58 (190)   | 99.12             | 99.47         |
| ADJ;NOM;PL           | 44.57 (184)       | 43.68 (190)   | 90.76             | 90.53         |
| ACC;ADJ;PL           | 49.18 (183)       | 47.37 (190)   | 97.27             | 98.42         |
| NFIN;V               | 36.67 (30)        | 33.33 (33)    | 96.67             | 93.94         |
| 2;MASC;PL;PST;V      | -                 | 18.18 (33)    | -                 | 72.73         |
| 3;MASC;PST;SG;V      | 38.10 (21)        | 27.27 (33)    | 90.48             | 78.79         |
| 2;PRS;SG;V           | 0.00 (4)          | 8.00 (25)     | 75.00             | 20            |
| 2;IMP;SG;V           | 10.00 (10)        | 6.06 (33)     | 30.00             | 21.21         |
| 1;FEM;PST;SG;V       | 20.00 (5)         | 30.30 (33)    | 100.00            | 84.85         |
| 3;MASC;PL;PST;V      | 30.00 (20)        | 18.18 (33)    | 80.00             | 72.73         |
| 2;PL;PRS;V           | 0.00 (1)          | 0.00 (25)     | 0.00              | 8             |
| 2;MASC;PST;SG;V      | 25.00 (4)         | 27.27 (33)    | 50.00             | 78.79         |
| 1;PL;PRS;V           | 11.11 (9)         | 8.00 (25)     | 66.67             | 36            |
| 3;NEUT;PST;SG;V      | 38.46 (13)        | 24.24 (33)    | 84.62             | 81.82         |
| 3;FEM;PST;SG;V       | 42.86 (21)        | 30.30 (33)    | 90.48             | 84.85         |
| 2;IMP;PL;V           | 0.00 (4)          | 3.03 (33)     | 50.00             | 30.3          |
| 3;PL;PRS;V           | 27.78 (18)        | 20.00 (25)    | 72.22             | 72            |
| 2;FEM;PST;SG;V       | -                 | 30.30 (33)    | -                 | 84.85         |
| 1;FEM;PL;PST;V       | -                 | 18.18 (33)    | -                 | 72.73         |
| 2;FEM;PL;PST;V       | -                 | 18.18 (33)    | -                 | 72.73         |
| 1;MASC;PST;SG;V      | 28.57 (14)        | 27.27 (33)    | 85.71             | 78.79         |
| 3;PRS;SG;V           | 20.83 (24)        | 20.00 (25)    | 62.50             | 56            |
| 1;MASC;PL;PST;V      | 20.00 (5)         | 18.18 (33)    | 100.00            | 72.73         |
| 3;FEM;PL;PST;V       | 27.78 (18)        | 18.18 (33)    | 83.33             | 72.73         |
| 1;PRS;SG;V           | 44.44 (9)         | 24.00 (25)    | 55.56             | 28            |
| 1;FUT;SG;V           | 0.00 (2)          | 0.00 (8)      | 0.00              | 0             |
| 3;FUT;SG;V           | 0.00 (7)          | 0.00 (8)      | 14.29             | 12.5          |
| 2;FUT;SG;V           | -                 | 12.50 (8)     | -                 | 50            |
| 3;FUT;PL;V           | 0.00 (6)          | 0.00 (8)      | 50.00             | 25            |
| 1;FUT;PL;V           | -                 | 0.00 (8)      | -                 | 50            |
| 2;FUT;PL;V           | 0.00 (2)          | 0.00 (8)      | 50.00             | 37.5          |

Table 37: The performance of Artetxe et al. (2016)’s model on translating words belonging to a specific morphological category for the Russian–Polish language pair (the grey numbers correspond to the dictionary sizes).

| Russian–Slovak       |                   |               |                   |               |
|----------------------|-------------------|---------------|-------------------|---------------|
| Morph                | Normal (In vocab) | Normal (+OOV) | Lexeme (In vocab) | Lexeme (+OOV) |
| ALL                  | 21.12 (1610)      | 18.00 (2150)  | 79.94             | 77.53         |
| ACC;N;PL             | 15.38 (91)        | 12.84 (109)   | 68.13             | 64.22         |
| ESS;N;PL             | 35.80 (81)        | 22.22 (189)   | 100.00            | 94.18         |
| INS;N;SG             | 27.45 (153)       | 22.28 (193)   | 83.66             | 81.87         |
| INS;N;PL             | 35.24 (105)       | 23.81 (189)   | 99.05             | 98.94         |
| N;NOM;SG             | 22.58 (186)       | 21.58 (190)   | 73.12             | 72.11         |
| GEN;N;PL             | 14.09 (149)       | 11.11 (189)   | 66.44             | 61.38         |
| ACC;N;SG             | 21.47 (177)       | 19.69 (193)   | 74.58             | 72.54         |
| ESS;N;SG             | 20.44 (137)       | 16.06 (193)   | 60.58             | 50.26         |
| GEN;N;SG             | 23.16 (177)       | 21.24 (193)   | 71.75             | 69.95         |
| DAT;N;SG             | 17.42 (132)       | 14.51 (193)   | 62.88             | 57.51         |
| DAT;N;PL             | 30.53 (95)        | 21.81 (188)   | 87.37             | 84.57         |
| N;NOM;PL             | 20.73 (164)       | 18.82 (186)   | 76.22             | 72.04         |
| 3;MASC;PST;SG;V      | -                 | 0.00 (2)      | -                 | 0             |
| 2;IMP;PL;V           | -                 | 0.00 (2)      | -                 | 0             |
| 2;PRS;SG;V           | -                 | 0.00 (2)      | -                 | 50            |
| 1;PL;PRS;V           | -                 | 50.00 (2)     | -                 | 100           |
| 3;FEM;PST;SG;V       | -                 | 0.00 (2)      | -                 | 0             |
| 2;IMP;SG;V           | -                 | 0.00 (2)      | -                 | 0             |
| NFIN;V               | 7.50 (40)         | 6.25 (48)     | 100.00            | 100           |
| 1;PRS;SG;V           | 0.00 (1)          | 0.00 (2)      | 0.00              | 50            |
| 3;PL;PRS;V           | 0.00 (2)          | 0.00 (2)      | 50.00             | 50            |
| 2;PL;PRS;V           | -                 | 50.00 (2)     | -                 | 100           |
| 3;NEUT;PST;SG;V      | -                 | 0.00 (2)      | -                 | 0             |
| 3;FEM;PL;PST;V       | -                 | 0.00 (2)      | -                 | 0             |
| 3;PRS;SG;V           | 50.00 (2)         | 50.00 (2)     | 100.00            | 100           |
| 3;MASC;PL;PST;V      | -                 | 0.00 (2)      | -                 | 0             |
| ADJ;FEM;GEN;SG       | 21.74 (23)        | 20.83 (24)    | 91.30             | 95.83         |
| ADJ;ESS;NEUT;SG      | 4.76 (21)         | 8.33 (24)     | 80.95             | 83.33         |
| ADJ;DAT;FEM;SG       | 21.74 (23)        | 20.83 (24)    | 91.30             | 95.83         |
| ADJ;GEN;PL           | 8.33 (24)         | 8.33 (24)     | 91.67             | 91.67         |
| ADJ;NOM;PL           | 4.35 (23)         | 8.33 (24)     | 78.26             | 79.17         |
| ADJ;FEM;NOM;SG       | 13.04 (23)        | 16.67 (24)    | 100.00            | 100           |
| ACC;ADJ;PL           | 8.70 (23)         | 8.33 (24)     | 91.30             | 91.67         |
| ADJ;NEUT;NOM;SG      | 8.70 (23)         | 8.33 (24)     | 91.30             | 91.67         |
| ADJ;INS;NEUT;SG      | 8.33 (24)         | 8.33 (24)     | 100.00            | 100           |
| ADJ;INS;MASC;SG      | 8.33 (24)         | 8.33 (24)     | 100.00            | 100           |
| ADJ;FEM;INS;SG       | 23.81 (21)        | 20.83 (24)    | 95.24             | 95.83         |
| ADJ;ESS;FEM;SG       | 21.74 (23)        | 20.83 (24)    | 91.30             | 95.83         |
| ACC;ADJ;INAN;MASC;SG | 29.17 (24)        | 29.17 (24)    | 91.67             | 91.67         |
| ACC;ADJ;FEM;SG       | 8.70 (23)         | 8.33 (24)     | 100.00            | 100           |
| ADJ;ESS;PL           | 8.33 (24)         | 8.33 (24)     | 91.67             | 91.67         |
| ADJ;GEN;MASC;SG      | 12.50 (24)        | 12.50 (24)    | 95.83             | 95.83         |
| ACC;ADJ;MASC;SG      | 12.50 (24)        | 12.50 (24)    | 95.83             | 95.83         |
| ADJ;GEN;NEUT;SG      | 12.50 (24)        | 12.50 (24)    | 95.83             | 95.83         |
| ADJ;ESS;MASC;SG      | 4.76 (21)         | 8.33 (24)     | 80.95             | 83.33         |
| ADJ;DAT;PL           | 8.33 (24)         | 8.33 (24)     | 100.00            | 100           |
| ADJ;DAT;NEUT;SG      | 14.29 (21)        | 12.50 (24)    | 100.00            | 100           |
| ACC;ADJ;NEUT;SG      | 8.70 (23)         | 8.33 (24)     | 91.30             | 91.67         |
| ADJ;MASC;NOM;SG      | 29.17 (24)        | 29.17 (24)    | 91.67             | 91.67         |
| ADJ;DAT;MASC;SG      | 14.29 (21)        | 12.50 (24)    | 100.00            | 100           |
| ADJ;INS;PL           | 31.82 (22)        | 33.33 (24)    | 100.00            | 100           |

Table 38: The performance of Artetxe et al. (2016)’s model on translating words belonging to a specific morphological category for the Russian–Slovak language pair (the grey numbers correspond to the dictionary sizes).



| Russian–Ukrainian    |                   |               |                   |               |
|----------------------|-------------------|---------------|-------------------|---------------|
| Morph                | Normal (In vocab) | Normal (+OOV) | Lexeme (In vocab) | Lexeme (+OOV) |
| ALL                  | 44.98 (1165)      | 42.19 (1396)  | 85.15             | 83.67         |
| N;NOM;SG             | 45.21 (146)       | 44.90 (147)   | 84.25             | 83.67         |
| N;NOM;PL             | 43.88 (139)       | 43.88 (139)   | 84.17             | 84.17         |
| GEN;N;SG             | 42.76 (145)       | 42.47 (146)   | 84.83             | 84.25         |
| GEN;N;PL             | 44.27 (131)       | 42.14 (140)   | 80.92             | 77.86         |
| ESS;N;PL             | 57.83 (83)        | 47.48 (139)   | 95.18             | 94.24         |
| DAT;N;PL             | 60.00 (70)        | 51.08 (139)   | 98.57             | 97.12         |
| ACC;N;PL             | 25.42 (59)        | 24.59 (61)    | 74.58             | 73.77         |
| DAT;N;SG             | 32.80 (125)       | 28.57 (147)   | 64.00             | 55.1          |
| ESS;N;SG             | 40.62 (128)       | 36.05 (147)   | 68.75             | 59.86         |
| ACC;N;SG             | 45.83 (144)       | 45.58 (147)   | 82.64             | 80.95         |
| INS;N;SG             | 46.32 (136)       | 42.86 (147)   | 94.85             | 92.52         |
| INS;N;PL             | 53.54 (99)        | 46.76 (139)   | 100.00            | 100           |
| ADJ;ESS;PL           | 33.33 (3)         | 33.33 (3)     | 100.00            | 100           |
| ACC;ADJ;INAN;MASC;SG | 33.33 (3)         | 33.33 (3)     | 100.00            | 100           |
| ADJ;DAT;PL           | 33.33 (3)         | 33.33 (3)     | 100.00            | 100           |
| ACC;ADJ;PL           | 33.33 (3)         | 33.33 (3)     | 100.00            | 100           |
| ADJ;DAT;NEUT;SG      | -                 | 33.33 (3)     | -                 | 100           |
| ADJ;NOM;PL           | 33.33 (3)         | 33.33 (3)     | 100.00            | 100           |
| ACC;ADJ;FEM;SG       | 33.33 (3)         | 33.33 (3)     | 100.00            | 100           |
| ADJ;DAT;MASC;SG      | -                 | 33.33 (3)     | -                 | 100           |
| ADJ;FEM;INS;SG       | 33.33 (3)         | 33.33 (3)     | 100.00            | 100           |
| ADJ;INS;NEUT;SG      | 33.33 (3)         | 33.33 (3)     | 100.00            | 100           |
| ADJ;GEN;PL           | 33.33 (3)         | 33.33 (3)     | 100.00            | 100           |
| ADJ;DAT;FEM;SG       | -                 | 33.33 (3)     | -                 | 100           |
| ADJ;ESS;NEUT;SG      | -                 | 33.33 (3)     | -                 | 100           |
| ADJ;ESS;FEM;SG       | -                 | 33.33 (3)     | -                 | 100           |
| ACC;ADJ;INAN;PL      | 33.33 (3)         | 33.33 (3)     | 100.00            | 100           |
| ADJ;GEN;MASC;SG      | 33.33 (3)         | 33.33 (3)     | 100.00            | 100           |
| ADJ;GEN;NEUT;SG      | 33.33 (3)         | 33.33 (3)     | 100.00            | 100           |
| ACC;ADJ;NEUT;SG      | 33.33 (3)         | 33.33 (3)     | 66.67             | 66.67         |
| ADJ;INS;PL           | 33.33 (3)         | 33.33 (3)     | 100.00            | 100           |
| ADJ;FEM;NOM;SG       | 33.33 (3)         | 33.33 (3)     | 100.00            | 100           |
| ADJ;ESS;MASC;SG      | -                 | 33.33 (3)     | -                 | 100           |
| ADJ;MASC;NOM;SG      | 33.33 (3)         | 33.33 (3)     | 100.00            | 100           |
| ADJ;NEUT;NOM;SG      | 33.33 (3)         | 33.33 (3)     | 66.67             | 66.67         |
| ADJ;FEM;GEN;SG       | 33.33 (3)         | 33.33 (3)     | 100.00            | 100           |
| ADJ;INS;MASC;SG      | 33.33 (3)         | 33.33 (3)     | 100.00            | 100           |
| ACC;ADJ;MASC;SG      | 33.33 (3)         | 33.33 (3)     | 100.00            | 100           |
| 3;PRS;SG;V           | 66.67 (3)         | 66.67 (3)     | 100.00            | 100           |
| 2;IMP;SG;V           | 0.00 (3)          | 0.00 (3)      | 66.67             | 66.67         |
| 3;NEUT;PST;SG;V      | 66.67 (3)         | 66.67 (3)     | 100.00            | 100           |
| 2;MASC;PL;PST;V      | 33.33 (3)         | 33.33 (3)     | 100.00            | 100           |
| 3;MASC;PST;SG;V      | 66.67 (3)         | 66.67 (3)     | 100.00            | 100           |
| 2;PL;PRS;V           | 0.00 (2)          | 33.33 (3)     | 100.00            | 100           |
| 3;MASC;PL;PST;V      | 33.33 (3)         | 33.33 (3)     | 100.00            | 100           |
| 1;MASC;PL;PST;V      | 33.33 (3)         | 33.33 (3)     | 100.00            | 100           |
| 3;PL;PRS;V           | 66.67 (3)         | 66.67 (3)     | 100.00            | 100           |
| 2;IMP;PL;V           | 0.00 (3)          | 0.00 (3)      | 100.00            | 100           |
| 2;FEM;PST;SG;V       | 66.67 (3)         | 66.67 (3)     | 100.00            | 100           |
| 1;PRS;SG;V           | 0.00 (3)          | 0.00 (3)      | 66.67             | 66.67         |
| 1;FEM;PST;SG;V       | 66.67 (3)         | 66.67 (3)     | 100.00            | 100           |
| 1;PL;PRS;V           | 0.00 (3)          | 0.00 (3)      | 100.00            | 100           |
| 2;FEM;PL;PST;V       | 33.33 (3)         | 33.33 (3)     | 100.00            | 100           |
| 2;MASC;PST;SG;V      | 66.67 (3)         | 66.67 (3)     | 100.00            | 100           |
| 3;FEM;PL;PST;V       | 33.33 (3)         | 33.33 (3)     | 100.00            | 100           |
| 1;MASC;PST;SG;V      | 66.67 (3)         | 66.67 (3)     | 100.00            | 100           |
| 2;PRS;SG;V           | 50.00 (2)         | 33.33 (3)     | 100.00            | 100           |
| NFIN;V               | 66.67 (3)         | 66.67 (3)     | 100.00            | 100           |
| 3;FEM;PST;SG;V       | 66.67 (3)         | 66.67 (3)     | 100.00            | 100           |
| 1;FEM;PL;PST;V       | 33.33 (3)         | 33.33 (3)     | 100.00            | 100           |

Table 39: The performance of [Artetxe et al. \(2016\)](#)’s model on translating words belonging to a specific morphological category for the Russian–Ukrainian language pair (the grey numbers correspond to the dictionary sizes).



| Slovak–Czech         |                   |               |                   |               |
|----------------------|-------------------|---------------|-------------------|---------------|
| Morph                | Normal (In vocab) | Normal (+OOV) | Lexeme (In vocab) | Lexeme (+OOV) |
| ALL                  | 47.79 (858)       | 39.34 (1154)  | 90.21             | 88.56         |
| GEN;N;SG             | 61.33 (75)        | 60.53 (76)    | 86.67             | 86.84         |
| DAT;N;PL             | 54.76 (42)        | 39.74 (78)    | 95.24             | 94.87         |
| ESS;N;SG             | 47.17 (53)        | 36.84 (76)    | 79.25             | 65.79         |
| N;NOM;PL             | 52.24 (67)        | 44.87 (78)    | 79.10             | 74.36         |
| ACC;N;SG             | 55.56 (72)        | 53.95 (76)    | 80.56             | 81.58         |
| INS;N;SG             | 58.06 (62)        | 51.32 (76)    | 93.55             | 92.11         |
| N;NOM;SG             | 52.63 (76)        | 51.32 (76)    | 81.58             | 78.95         |
| ACC;N;PL             | 55.88 (68)        | 48.72 (78)    | 80.88             | 78.21         |
| INS;N;PL             | 30.77 (52)        | 23.08 (78)    | 84.62             | 80.77         |
| ESS;N;PL             | 66.67 (39)        | 41.03 (78)    | 100.00            | 97.44         |
| DAT;N;SG             | 54.72 (53)        | 43.42 (76)    | 84.91             | 69.74         |
| GEN;N;PL             | 56.45 (62)        | 48.05 (77)    | 85.48             | 81.82         |
| NFIN;V               | 21.62 (185)       | 13.99 (286)   | 100.00            | 100           |
| ADJ;NEUT;NOM;SG      | 73.33 (15)        | 73.33 (15)    | 93.33             | 93.33         |
| ADJ;FEM;NOM;SG       | 66.67 (15)        | 66.67 (15)    | 100.00            | 100           |
| ADJ;ESS;PL           | 80.00 (15)        | 80.00 (15)    | 100.00            | 100           |
| ACC;ADJ;MASC;SG      | 60.00 (15)        | 60.00 (15)    | 100.00            | 100           |
| ACC;ADJ;INAN;MASC;SG | 66.67 (15)        | 66.67 (15)    | 100.00            | 100           |
| ADJ;FEM;GEN;SG       | 64.29 (14)        | 66.67 (15)    | 85.71             | 86.67         |
| ADJ;GEN;NEUT;SG      | 60.00 (15)        | 60.00 (15)    | 100.00            | 100           |
| ADJ;DAT;MASC;SG      | 72.73 (11)        | 73.33 (15)    | 100.00            | 100           |
| ADJ;DAT;NEUT;SG      | 72.73 (11)        | 73.33 (15)    | 100.00            | 100           |
| ADJ;MASC;NOM;SG      | 66.67 (15)        | 66.67 (15)    | 100.00            | 100           |
| ACC;ADJ;FEM;SG       | 50.00 (14)        | 53.33 (15)    | 92.86             | 93.33         |
| ADJ;GEN;MASC;SG      | 60.00 (15)        | 60.00 (15)    | 100.00            | 100           |
| ADJ;DAT;PL           | 61.54 (13)        | 66.67 (15)    | 100.00            | 100           |
| ADJ;INS;PL           | 46.15 (13)        | 46.67 (15)    | 100.00            | 100           |
| ACC;ADJ;NEUT;SG      | 73.33 (15)        | 73.33 (15)    | 93.33             | 93.33         |
| ADJ;GEN;PL           | 80.00 (15)        | 80.00 (15)    | 100.00            | 100           |
| ACC;ADJ;MASC;PL      | 80.00 (15)        | 80.00 (15)    | 100.00            | 100           |
| ADJ;ESS;MASC;SG      | 41.67 (12)        | 46.67 (15)    | 75.00             | 80            |
| ADJ;ESS;FEM;SG       | 64.29 (14)        | 66.67 (15)    | 85.71             | 86.67         |
| ADJ;INS;MASC;SG      | 61.54 (13)        | 66.67 (15)    | 100.00            | 100           |
| ADJ;DAT;FEM;SG       | 64.29 (14)        | 66.67 (15)    | 85.71             | 86.67         |
| ADJ;ESS;NEUT;SG      | 41.67 (12)        | 46.67 (15)    | 75.00             | 80            |
| ADJ;MASC;NOM;PL      | 50.00 (6)         | 33.33 (15)    | 100.00            | 73.33         |
| 3;MASC;PST;SG;V      | 100.00 (1)        | 100.00 (2)    | 100.00            | 100           |
| 2;IMP;SG;V           | 100.00 (1)        | 100.00 (2)    | 100.00            | 100           |
| 3;PL;PRS;V           | 100.00 (2)        | 100.00 (2)    | 100.00            | 100           |
| 3;NEUT;PST;SG;V      | 100.00 (1)        | 100.00 (2)    | 100.00            | 100           |
| 1;PL;PRS;V           | 100.00 (1)        | 100.00 (2)    | 100.00            | 100           |
| 2;PL;PRS;V           | 100.00 (1)        | 100.00 (2)    | 100.00            | 100           |
| 1;IMP;PL;V           | -                 | 50.00 (2)     | -                 | 100           |
| 3;FEM;PL;PST;V       | 100.00 (1)        | 100.00 (2)    | 100.00            | 100           |
| 3;FEM;PST;SG;V       | 100.00 (1)        | 100.00 (2)    | 100.00            | 100           |
| 2;IMP;PL;V           | -                 | 100.00 (2)    | -                 | 100           |
| 3;PRS;SG;V           | 50.00 (2)         | 50.00 (2)     | 100.00            | 100           |
| 2;PRS;SG;V           | 100.00 (1)        | 100.00 (2)    | 100.00            | 100           |
| 3;MASC;PL;PST;V      | 100.00 (1)        | 100.00 (2)    | 100.00            | 100           |
| 1;PRS;SG;V           | 0.00 (1)          | 0.00 (2)      | 0.00              | 0             |
| 3;NEUT;PL;PST;V      | 100.00 (1)        | 100.00 (2)    | 100.00            | 100           |

Table 40: The performance of [Artetxe et al. \(2016\)](#)’s model on translating words belonging to a specific morphological category for the Slovak–Czech language pair (the grey numbers correspond to the dictionary sizes).

| Slovak–Polish        |                   |               |                   |               |
|----------------------|-------------------|---------------|-------------------|---------------|
| Morph                | Normal (In vocab) | Normal (+OOV) | Lexeme (In vocab) | Lexeme (+OOV) |
| ALL                  | 25.78 (830)       | 21.02 (1094)  | 82.77             | 81.81         |
| ESS;N;SG             | 19.74 (76)        | 15.38 (104)   | 61.84             | 58.65         |
| GEN;N;PL             | 28.92 (83)        | 23.53 (102)   | 77.11             | 68.63         |
| N;NOM;SG             | 25.24 (103)       | 25.00 (104)   | 72.82             | 71.15         |
| INS;N;PL             | 25.00 (60)        | 14.71 (102)   | 100.00            | 99.02         |
| ACC;N;PL             | 32.65 (98)        | 31.37 (102)   | 80.61             | 79.41         |
| ACC;N;SG             | 25.00 (100)       | 24.04 (104)   | 72.00             | 73.08         |
| DAT;N;SG             | 14.71 (68)        | 10.58 (104)   | 61.76             | 50.96         |
| GEN;N;SG             | 28.57 (98)        | 26.92 (104)   | 78.57             | 76.92         |
| ESS;N;PL             | 32.69 (52)        | 23.53 (102)   | 100.00            | 99.02         |
| DAT;N;PL             | 32.65 (49)        | 19.61 (102)   | 87.76             | 85.29         |
| N;NOM;PL             | 28.57 (98)        | 26.47 (102)   | 81.63             | 80.39         |
| INS;N;SG             | 29.11 (79)        | 23.08 (104)   | 88.61             | 92.31         |
| NFIN;V               | 28.57 (35)        | 23.91 (46)    | 97.14             | 97.83         |
| ADJ;DAT;NEUT;SG      | 12.50 (8)         | 0.00 (12)     | 100.00            | 100           |
| ADJ;DAT;PL           | 16.67 (12)        | 16.67 (12)    | 100.00            | 100           |
| ADJ;NOM;PL           | 36.36 (11)        | 33.33 (12)    | 90.91             | 91.67         |
| ACC;ADJ;MASC;SG      | 25.00 (12)        | 33.33 (12)    | 91.67             | 100           |
| ADJ;ESS;PL           | 50.00 (12)        | 50.00 (12)    | 100.00            | 100           |
| ADJ;ESS;NEUT;SG      | 10.00 (10)        | 8.33 (12)     | 90.00             | 91.67         |
| ADJ;FEM;INS;SG       | 0.00 (11)         | 8.33 (12)     | 100.00            | 100           |
| ACC;ADJ;PL           | 36.36 (11)        | 33.33 (12)    | 90.91             | 91.67         |
| ADJ;MASC;NOM;SG      | 25.00 (12)        | 25.00 (12)    | 91.67             | 91.67         |
| ADJ;DAT;MASC;SG      | 12.50 (8)         | 0.00 (12)     | 100.00            | 100           |
| ACC;ADJ;FEM;SG       | 9.09 (11)         | 8.33 (12)     | 100.00            | 100           |
| ADJ;FEM;GEN;SG       | 27.27 (11)        | 33.33 (12)    | 100.00            | 100           |
| ADJ;FEM;NOM;SG       | 36.36 (11)        | 33.33 (12)    | 90.91             | 91.67         |
| ACC;ADJ;NEUT;SG      | 36.36 (11)        | 33.33 (12)    | 90.91             | 91.67         |
| ADJ;MASC;NOM;PL      | 0.00 (8)          | 0.00 (12)     | 75.00             | 75            |
| ADJ;ESS;FEM;SG       | 27.27 (11)        | 33.33 (12)    | 100.00            | 100           |
| ADJ;INS;PL           | 0.00 (9)          | 8.33 (12)     | 100.00            | 100           |
| ADJ;INS;MASC;SG      | 16.67 (12)        | 16.67 (12)    | 100.00            | 100           |
| ACC;ADJ;INAN;MASC;SG | 25.00 (12)        | 25.00 (12)    | 91.67             | 91.67         |
| ADJ;GEN;NEUT;SG      | 25.00 (12)        | 33.33 (12)    | 91.67             | 100           |
| ADJ;ESS;MASC;SG      | 10.00 (10)        | 8.33 (12)     | 90.00             | 91.67         |
| ADJ;DAT;FEM;SG       | 27.27 (11)        | 33.33 (12)    | 100.00            | 100           |
| ADJ;INS;NEUT;SG      | 16.67 (12)        | 16.67 (12)    | 100.00            | 100           |
| ADJ;GEN;MASC;SG      | 25.00 (12)        | 33.33 (12)    | 91.67             | 100           |
| ADJ;GEN;PL           | 50.00 (12)        | 50.00 (12)    | 100.00            | 100           |
| ADJ;NEUT;NOM;SG      | 36.36 (11)        | 33.33 (12)    | 90.91             | 91.67         |
| ACC;ADJ;MASC;PL      | 50.00 (12)        | 50.00 (12)    | 100.00            | 100           |
| 3;FEM;PL;PST;V       | -                 | 0.00 (1)      | -                 | 100           |
| 3;PRS;SG;V           | -                 | 0.00 (1)      | -                 | 100           |
| 3;MASC;PST;SG;V      | -                 | 0.00 (1)      | -                 | 100           |
| 2;IMP;SG;V           | -                 | 0.00 (1)      | -                 | 0             |
| 3;MASC;PL;PST;V      | -                 | 0.00 (1)      | -                 | 100           |
| 2;IMP;PL;V           | -                 | 0.00 (1)      | -                 | 0             |
| 2;PL;PRS;V           | -                 | 0.00 (1)      | -                 | 0             |
| 1;IMP;PL;V           | -                 | 0.00 (1)      | -                 | 0             |
| 3;PL;PRS;V           | -                 | 0.00 (1)      | -                 | 100           |
| 2;PRS;SG;V           | -                 | 0.00 (1)      | -                 | 100           |
| 1;PL;PRS;V           | -                 | 0.00 (1)      | -                 | 100           |
| 3;NEUT;PST;SG;V      | -                 | 0.00 (1)      | -                 | 100           |
| 3;FEM;PST;SG;V       | -                 | 0.00 (1)      | -                 | 100           |
| 1;PRS;SG;V           | -                 | 0.00 (1)      | -                 | 0             |

Table 41: The performance of Artetxe et al. (2016)’s model on translating words belonging to a specific morphological category for the Slovak–Polish language pair (the grey numbers correspond to the dictionary sizes).

| Slovak–Russian       |                   |               |                   |               |
|----------------------|-------------------|---------------|-------------------|---------------|
| Morph                | Normal (In vocab) | Normal (+OOV) | Lexeme (In vocab) | Lexeme (+OOV) |
| ALL                  | 11.79 (814)       | 9.12 (1140)   | 82.56             | 81.67         |
| GEN;N;SG             | 11.11 (72)        | 10.00 (80)    | 73.61             | 73.75         |
| ACC;N;SG             | 9.59 (73)         | 8.75 (80)     | 54.79             | 53.75         |
| N;NOM;SG             | 3.85 (78)         | 3.75 (80)     | 53.85             | 52.5          |
| DAT;N;SG             | 9.62 (52)         | 7.50 (80)     | 67.31             | 58.75         |
| ESS;N;SG             | 7.55 (53)         | 5.00 (80)     | 66.04             | 52.5          |
| GEN;N;PL             | 12.50 (64)        | 9.76 (82)     | 75.00             | 68.29         |
| DAT;N;PL             | 16.67 (36)        | 9.64 (83)     | 97.22             | 93.98         |
| INS;N;PL             | 6.82 (44)         | 4.82 (83)     | 97.73             | 96.39         |
| N;NOM;PL             | 12.50 (72)        | 10.84 (83)    | 76.39             | 74.7          |
| ESS;N;PL             | 12.20 (41)        | 9.64 (83)     | 97.56             | 95.18         |
| INS;N;SG             | 19.30 (57)        | 13.75 (80)    | 92.98             | 96.25         |
| ACC;N;PL             | 11.63 (43)        | 9.09 (55)     | 74.42             | 74.55         |
| ADJ;DAT;NEUT;SG      | 0.00 (11)         | 0.00 (17)     | 100.00            | 100           |
| ACC;ADJ;FEM;SG       | 38.46 (13)        | 29.41 (17)    | 100.00            | 88.24         |
| ADJ;MASC;NOM;SG      | 17.65 (17)        | 17.65 (17)    | 76.47             | 76.47         |
| ADJ;GEN;PL           | 35.29 (17)        | 35.29 (17)    | 100.00            | 100           |
| ADJ;ESS;PL           | 35.29 (17)        | 35.29 (17)    | 100.00            | 100           |
| ADJ;NEUT;NOM;SG      | 31.25 (16)        | 29.41 (17)    | 87.50             | 88.24         |
| ACC;ADJ;INAN;MASC;SG | 17.65 (17)        | 17.65 (17)    | 76.47             | 76.47         |
| ADJ;NOM;PL           | 31.25 (16)        | 29.41 (17)    | 87.50             | 88.24         |
| ADJ;FEM;GEN;SG       | 13.33 (15)        | 11.76 (17)    | 86.67             | 82.35         |
| ADJ;FEM;NOM;SG       | 6.25 (16)         | 5.88 (17)     | 87.50             | 88.24         |
| ADJ;DAT;FEM;SG       | 13.33 (15)        | 11.76 (17)    | 86.67             | 82.35         |
| ADJ;GEN;MASC;SG      | 18.75 (16)        | 17.65 (17)    | 100.00            | 100           |
| ACC;ADJ;PL           | 31.25 (16)        | 29.41 (17)    | 87.50             | 88.24         |
| ACC;ADJ;NEUT;SG      | 31.25 (16)        | 29.41 (17)    | 87.50             | 88.24         |
| ADJ;GEN;NEUT;SG      | 18.75 (16)        | 17.65 (17)    | 100.00            | 100           |
| ADJ;ESS;NEUT;SG      | 6.25 (16)         | 5.88 (17)     | 68.75             | 64.71         |
| ADJ;DAT;MASC;SG      | 0.00 (11)         | 0.00 (17)     | 100.00            | 100           |
| ADJ;INS;PL           | 14.29 (14)        | 11.76 (17)    | 100.00            | 100           |
| ADJ;ESS;FEM;SG       | 13.33 (15)        | 11.76 (17)    | 86.67             | 82.35         |
| ADJ;INS;NEUT;SG      | 25.00 (16)        | 23.53 (17)    | 100.00            | 100           |
| ADJ;INS;MASC;SG      | 25.00 (16)        | 23.53 (17)    | 100.00            | 100           |
| ADJ;DAT;PL           | 25.00 (16)        | 23.53 (17)    | 100.00            | 100           |
| ACC;ADJ;MASC;SG      | 18.75 (16)        | 17.65 (17)    | 100.00            | 100           |
| ADJ;ESS;MASC;SG      | 6.25 (16)         | 5.88 (17)     | 68.75             | 64.71         |
| ADJ;FEM;INS;SG       | 0.00 (12)         | 0.00 (17)     | 91.67             | 88.24         |
| NFIN;V               | 6.87 (131)        | 4.88 (205)    | 99.24             | 97.56         |
| 2;PL;PRS;V           | 100.00 (1)        | 50.00 (2)     | 100.00            | 100           |
| 3;FEM;PL;PST;V       | 0.00 (1)          | 0.00 (2)      | 100.00            | 100           |
| 2;PRS;SG;V           | 0.00 (1)          | 0.00 (2)      | 0.00              | 0             |
| 2;IMP;PL;V           | -                 | 0.00 (2)      | -                 | 100           |
| 3;PRS;SG;V           | 50.00 (2)         | 50.00 (2)     | 50.00             | 50            |
| 3;NEUT;PST;SG;V      | 0.00 (1)          | 0.00 (2)      | 100.00            | 100           |
| 3;MASC;PL;PST;V      | 0.00 (1)          | 0.00 (2)      | 100.00            | 100           |
| 2;IMP;SG;V           | 0.00 (1)          | 0.00 (2)      | 0.00              | 0             |
| 3;MASC;PST;SG;V      | 100.00 (1)        | 50.00 (2)     | 100.00            | 50            |
| 3;FEM;PST;SG;V       | 0.00 (1)          | 0.00 (2)      | 100.00            | 100           |
| 1;PRS;SG;V           | 0.00 (1)          | 0.00 (2)      | 0.00              | 0             |
| 1;PL;PRS;V           | 100.00 (1)        | 50.00 (2)     | 100.00            | 50            |
| 3;PL;PRS;V           | 0.00 (2)          | 0.00 (2)      | 50.00             | 50            |

Table 42: The performance of Artetxe et al. (2016)’s model on translating words belonging to a specific morphological category for the Slovak–Russian language pair (the grey numbers correspond to the dictionary sizes).

| Slovak–Ukrainian     |                   |               |                   |               |
|----------------------|-------------------|---------------|-------------------|---------------|
| Morph                | Normal (In vocab) | Normal (+OOV) | Lexeme (In vocab) | Lexeme (+OOV) |
| ALL                  | 20.00 (330)       | 16.71 (425)   | 83.03             | 81.65         |
| ACC;N;SG             | 15.91 (44)        | 15.22 (46)    | 68.18             | 65.22         |
| ACC;N;PL             | 14.29 (42)        | 13.04 (46)    | 76.19             | 76.09         |
| ESS;N;SG             | 14.71 (34)        | 10.87 (46)    | 76.47             | 65.22         |
| ESS;N;PL             | 33.33 (24)        | 17.39 (46)    | 91.67             | 93.48         |
| GEN;N;PL             | 29.73 (37)        | 23.91 (46)    | 83.78             | 73.91         |
| N;NOM;SG             | 13.04 (46)        | 13.04 (46)    | 67.39             | 67.39         |
| N;NOM;PL             | 11.90 (42)        | 10.87 (46)    | 76.19             | 76.09         |
| DAT;N;SG             | 9.09 (33)         | 10.87 (46)    | 72.73             | 65.22         |
| INS;N;PL             | 16.13 (31)        | 13.04 (46)    | 100               | 100           |
| GEN;N;SG             | 4.55 (44)         | 4.35 (46)     | 77.27             | 78.26         |
| INS;N;SG             | 22.86 (35)        | 17.39 (46)    | 88.57             | 89.13         |
| DAT;N;PL             | 22.73 (22)        | 17.39 (46)    | 95.45             | 91.3          |
| ADJ;GEN;MASC;SG      | 50.00 (2)         | 50.00 (2)     | 100               | 100           |
| ADJ;NEUT;NOM;SG      | 100.00 (2)        | 100.00 (2)    | 100               | 100           |
| ADJ;INS;PL           | 0.00 (2)          | 0.00 (2)      | 100               | 100           |
| ADJ;ESS;FEM;SG       | 0.00 (2)          | 0.00 (2)      | 100               | 100           |
| ACC;ADJ;FEM;SG       | 0.00 (2)          | 0.00 (2)      | 100               | 100           |
| ADJ;ESS;PL           | 50.00 (2)         | 50.00 (2)     | 100               | 100           |
| ADJ;INS;MASC;SG      | 0.00 (2)          | 0.00 (2)      | 100               | 100           |
| ADJ;DAT;PL           | 0.00 (2)          | 0.00 (2)      | 100               | 100           |
| ADJ;NOM;PL           | 100.00 (2)        | 100.00 (2)    | 100               | 100           |
| ACC;ADJ;MASC;SG      | 50.00 (2)         | 50.00 (2)     | 100               | 100           |
| ACC;ADJ;NEUT;SG      | 100.00 (2)        | 100.00 (2)    | 100               | 100           |
| ADJ;FEM;INS;SG       | 0.00 (2)          | 0.00 (2)      | 100               | 100           |
| ADJ;DAT;FEM;SG       | 0.00 (2)          | 0.00 (2)      | 100               | 100           |
| ACC;ADJ;INAN;MASC;SG | 50.00 (2)         | 50.00 (2)     | 100               | 100           |
| ADJ;FEM;NOM;SG       | 0.00 (2)          | 0.00 (2)      | 100               | 100           |
| ADJ;ESS;MASC;SG      | 0.00 (2)          | 0.00 (2)      | 0                 | 0             |
| ADJ;DAT;MASC;SG      | 0.00 (1)          | 0.00 (2)      | 100               | 100           |
| ACC;ADJ;PL           | 100.00 (2)        | 100.00 (2)    | 100               | 100           |
| ADJ;GEN;PL           | 50.00 (2)         | 50.00 (2)     | 100               | 100           |
| ADJ;FEM;GEN;SG       | 0.00 (2)          | 0.00 (2)      | 100               | 100           |
| ADJ;GEN;NEUT;SG      | 50.00 (2)         | 50.00 (2)     | 100               | 100           |
| ADJ;ESS;NEUT;SG      | 0.00 (2)          | 0.00 (2)      | 0                 | 0             |
| ADJ;MASC;NOM;SG      | 50.00 (2)         | 50.00 (2)     | 100               | 100           |
| ADJ;DAT;NEUT;SG      | 0.00 (1)          | 0.00 (2)      | 100               | 100           |
| ADJ;INS;NEUT;SG      | 0.00 (2)          | 0.00 (2)      | 100               | 100           |
| NFIN;V               | 66.67 (3)         | 50.00 (4)     | 100               | 100           |

Table 43: The performance of Artetxe et al. (2016)’s model on translating words belonging to a specific morphological category for the Slovak–Ukrainian language pair (the grey numbers correspond to the dictionary sizes).

| Ukrainian–Czech      |                   |               |                   |               |
|----------------------|-------------------|---------------|-------------------|---------------|
| Morph                | Normal (In vocab) | Normal (+OOV) | Lexeme (In vocab) | Lexeme (+OOV) |
| ALL                  | 34.33 (699)       | 29.34 (869)   | 81.97             | 77.33         |
| N;PL;VOC             | 39.19 (74)        | 36.25 (80)    | 83.78             | 83.75         |
| ACC;N;PL             | 43.24 (74)        | 40.00 (80)    | 89.19             | 88.75         |
| INS;N;PL             | 24.62 (65)        | 21.25 (80)    | 90.77             | 86.25         |
| ACC;N;SG             | 41.77 (79)        | 40.24 (82)    | 77.22             | 71.95         |
| DAT;N;PL             | 41.46 (41)        | 27.50 (80)    | 97.56             | 96.25         |
| GEN;N;PL             | 34.72 (72)        | 31.25 (80)    | 77.78             | 71.25         |
| N;NOM;PL             | 39.19 (74)        | 36.25 (80)    | 83.78             | 83.75         |
| ESS;N;PL             | 30.61 (49)        | 18.75 (80)    | 93.88             | 85            |
| ESS;N;SG             | 32.35 (68)        | 27.16 (81)    | 72.06             | 67.9          |
| DAT;N;SG             | 26.15 (65)        | 21.95 (82)    | 70.77             | 64.63         |
| GEN;N;SG             | 40.51 (79)        | 39.02 (82)    | 88.61             | 85.37         |
| INS;N;SG             | 41.33 (75)        | 37.80 (82)    | 86.67             | 85.37         |
| N;NOM;SG             | 34.57 (81)        | 32.93 (82)    | 80.25             | 76.83         |
| N;SG;VOC             | 28.57 (35)        | 23.17 (82)    | 54.29             | 48.78         |
| 1;IMP;PL;V           | 20.00 (5)         | 16.67 (6)     | 60                | 50            |
| 3;NEUT;PST;SG;V      | 60.00 (5)         | 66.67 (6)     | 80                | 83.33         |
| NFIN;V               | 50.00 (6)         | 50.00 (6)     | 100               | 100           |
| 3;MASC;PST;SG;V      | 66.67 (6)         | 66.67 (6)     | 100               | 100           |
| 3;FEM;PST;SG;V       | 66.67 (6)         | 66.67 (6)     | 100               | 100           |
| 2;IMP;SG;V           | 0.00 (6)          | 0.00 (6)      | 33.33             | 33.33         |
| 2;IMP;PL;V           | 33.33 (6)         | 33.33 (6)     | 83.33             | 83.33         |
| 1;PRS;SG;V           | 25.00 (4)         | 20.00 (5)     | 50                | 40            |
| 3;PL;PRS;V           | 60.00 (5)         | 60.00 (5)     | 60                | 60            |
| 3;FEM;PL;PST;V       | 66.67 (6)         | 66.67 (6)     | 100               | 100           |
| 2;PL;PRS;V           | 50.00 (4)         | 40.00 (5)     | 100               | 80            |
| 3;PRS;SG;V           | 40.00 (5)         | 40.00 (5)     | 100               | 100           |
| 2;PRS;SG;V           | 20.00 (5)         | 20.00 (5)     | 80                | 80            |
| 3;MASC;PL;PST;V      | 66.67 (6)         | 66.67 (6)     | 100               | 100           |
| 1;PL;PRS;V           | 25.00 (4)         | 20.00 (5)     | 75                | 80            |
| 3;FUT;PL;V           | 0.00 (1)          | 0.00 (1)      | 0                 | 0             |
| 3;FUT;SG;V           | 0.00 (1)          | 0.00 (1)      | 0                 | 0             |
| 2;FUT;PL;V           | 0.00 (1)          | 0.00 (1)      | 100               | 100           |
| 1;FUT;PL;V           | 0.00 (1)          | 0.00 (1)      | 100               | 100           |
| 2;FUT;SG;V           | 0.00 (1)          | 0.00 (1)      | 0                 | 0             |
| 1;FUT;SG;V           | 0.00 (1)          | 0.00 (1)      | 100               | 100           |
| ADJ;MASC;NOM;SG      | 0.00 (1)          | 0.00 (1)      | 100               | 100           |
| ADJ;ESS;PL           | 0.00 (1)          | 0.00 (1)      | 100               | 100           |
| ADJ;DAT;NEUT;SG      | 0.00 (1)          | 0.00 (1)      | 100               | 100           |
| ACC;ADJ;FEM;SG       | 0.00 (1)          | 0.00 (1)      | 100               | 100           |
| ACC;ADJ;MASC;SG      | 0.00 (1)          | 0.00 (1)      | 100               | 100           |
| ADJ;NEUT;NOM;SG      | 0.00 (1)          | 0.00 (1)      | 100               | 100           |
| ADJ;GEN;NEUT;SG      | 0.00 (1)          | 0.00 (1)      | 100               | 100           |
| ADJ;INS;MASC;SG      | 0.00 (1)          | 0.00 (1)      | 100               | 100           |
| ADJ;FEM;NOM;SG       | 0.00 (1)          | 0.00 (1)      | 100               | 100           |
| ADJ;DAT;FEM;SG       | 0.00 (1)          | 0.00 (1)      | 100               | 100           |
| ADJ;DAT;PL           | 0.00 (1)          | 0.00 (1)      | 100               | 100           |
| ADJ;ESS;NEUT;SG      | 0.00 (1)          | 0.00 (1)      | 100               | 100           |
| ADJ;FEM;GEN;SG       | 0.00 (1)          | 0.00 (1)      | 100               | 100           |
| ADJ;GEN;PL           | 0.00 (1)          | 0.00 (1)      | 100               | 100           |
| ADJ;DAT;MASC;SG      | 0.00 (1)          | 0.00 (1)      | 100               | 100           |
| ADJ;INS;PL           | 0.00 (1)          | 0.00 (1)      | 100               | 100           |
| ADJ;GEN;MASC;SG      | 0.00 (1)          | 0.00 (1)      | 100               | 100           |
| ACC;ADJ;NEUT;SG      | 0.00 (1)          | 0.00 (1)      | 100               | 100           |
| ACC;ADJ;INAN;MASC;SG | 0.00 (1)          | 0.00 (1)      | 100               | 100           |
| ADJ;ESS;MASC;SG      | 0.00 (1)          | 0.00 (1)      | 100               | 100           |
| ADJ;ESS;FEM;SG       | 0.00 (1)          | 0.00 (1)      | 100               | 100           |

Table 44: The performance of Artetxe et al. (2016)’s model on translating words belonging to a specific morphological category for the Ukrainian–Czech language pair (the grey numbers correspond to the dictionary sizes).

| Ukrainian–Polish     |                   |               |                   |               |
|----------------------|-------------------|---------------|-------------------|---------------|
| Morph                | Normal (In vocab) | Normal (+OOV) | Lexeme (In vocab) | Lexeme (+OOV) |
| ALL                  | 44.59 (850)       | 38.61 (1054)  | 82.94             | 79.22         |
| INS;N;SG             | 50.00 (96)        | 45.71 (105)   | 95.83             | 93.33         |
| GEN;N;PL             | 32.29 (96)        | 30.10 (103)   | 66.67             | 67.96         |
| ACC;N;SG             | 51.96 (102)       | 50.48 (105)   | 84.31             | 82.86         |
| DAT;N;PL             | 49.02 (51)        | 35.92 (103)   | 96.08             | 94.17         |
| ACC;N;PL             | 51.52 (99)        | 49.51 (103)   | 87.88             | 85.44         |
| ESS;N;PL             | 56.52 (69)        | 45.63 (103)   | 92.75             | 94.17         |
| N;PL;VOC             | 52.00 (100)       | 50.49 (103)   | 87.00             | 84.47         |
| N;NOM;SG             | 49.52 (105)       | 49.52 (105)   | 81.90             | 80.95         |
| GEN;N;SG             | 51.96 (102)       | 50.48 (105)   | 89.22             | 86.67         |
| INS;N;PL             | 47.13 (87)        | 41.75 (103)   | 98.85             | 99.03         |
| ESS;N;SG             | 35.87 (92)        | 31.43 (105)   | 72.83             | 66.67         |
| N;SG;VOC             | 35.29 (51)        | 23.81 (105)   | 60.78             | 45.71         |
| N;NOM;PL             | 52.00 (100)       | 50.49 (103)   | 87.00             | 84.47         |
| DAT;N;SG             | 36.25 (80)        | 28.57 (105)   | 73.75             | 66.67         |
| 2;IMP;PL;V           | -                 | 0.00 (2)      | -                 | 0             |
| 2;FEM;PL;PST;V       | -                 | 0.00 (2)      | -                 | 0             |
| 1;PL;PRS;V           | 50.00 (2)         | 50.00 (2)     | 50.00             | 50            |
| 2;PRS;SG;V           | 50.00 (2)         | 50.00 (2)     | 100.00            | 50            |
| 3;MASC;PL;PST;V      | 50.00 (2)         | 0.00 (2)      | 100.00            | 0             |
| 2;PL;PRS;V           | 0.00 (1)          | 0.00 (2)      | 0.00              | 0             |
| 1;FEM;PL;PST;V       | -                 | 0.00 (2)      | -                 | 0             |
| 3;FEM;PST;SG;V       | 0.00 (1)          | 0.00 (2)      | 100.00            | 50            |
| 2;FEM;PST;SG;V       | -                 | 0.00 (2)      | -                 | 50            |
| 1;PRS;SG;V           | 0.00 (2)          | 0.00 (2)      | 0.00              | 0             |
| 3;PRS;SG;V           | 0.00 (2)          | 0.00 (2)      | 100.00            | 100           |
| 3;NEUT;PST;SG;V      | 0.00 (1)          | 0.00 (2)      | 100.00            | 50            |
| 1;MASC;PL;PST;V      | 100.00 (1)        | 0.00 (2)      | 100.00            | 0             |
| 3;MASC;PST;SG;V      | 50.00 (2)         | 50.00 (2)     | 100.00            | 100           |
| 1;IMP;PL;V           | -                 | 50.00 (2)     | -                 | 50            |
| 2;MASC;PL;PST;V      | -                 | 0.00 (2)      | -                 | 0             |
| 3;FEM;PL;PST;V       | 100.00 (1)        | 0.00 (2)      | 100.00            | 0             |
| 2;MASC;PST;SG;V      | 100.00 (1)        | 50.00 (2)     | 100.00            | 100           |
| 3;PL;PRS;V           | 50.00 (2)         | 50.00 (2)     | 100.00            | 100           |
| NFIN;V               | 0.00 (2)          | 0.00 (2)      | 50.00             | 50            |
| 1;FEM;PST;SG;V       | 0.00 (1)          | 0.00 (2)      | 100.00            | 50            |
| 2;IMP;SG;V           | 0.00 (1)          | 0.00 (2)      | 0.00              | 50            |
| 1;MASC;PST;SG;V      | 100.00 (1)        | 50.00 (2)     | 100.00            | 100           |
| ADJ;ESS;MASC;SG      | 50.00 (2)         | 50.00 (2)     | 100.00            | 100           |
| ADJ;MASC;NOM;SG      | 50.00 (2)         | 50.00 (2)     | 100.00            | 100           |
| ADJ;GEN;NEUT;SG      | 50.00 (2)         | 50.00 (2)     | 100.00            | 100           |
| ADJ;NOM;PL           | 50.00 (2)         | 50.00 (2)     | 50.00             | 50            |
| ADJ;NEUT;NOM;SG      | 50.00 (2)         | 50.00 (2)     | 100.00            | 100           |
| ACC;ADJ;NEUT;SG      | 50.00 (2)         | 50.00 (2)     | 100.00            | 100           |
| ADJ;INS;NEUT;SG      | 0.00 (2)          | 0.00 (2)      | 100.00            | 100           |
| ADJ;DAT;PL           | 0.00 (2)          | 0.00 (2)      | 100.00            | 100           |
| ADJ;INS;PL           | 50.00 (2)         | 50.00 (2)     | 100.00            | 100           |
| ADJ;FEM;INS;SG       | 50.00 (2)         | 50.00 (2)     | 100.00            | 100           |
| ACC;ADJ;FEM;SG       | 50.00 (2)         | 50.00 (2)     | 100.00            | 100           |
| ADJ;FEM;NOM;SG       | 50.00 (2)         | 50.00 (2)     | 100.00            | 100           |
| ADJ;FEM;GEN;SG       | 50.00 (2)         | 50.00 (2)     | 100.00            | 100           |
| ADJ;GEN;MASC;SG      | 50.00 (2)         | 50.00 (2)     | 100.00            | 100           |
| ADJ;DAT;MASC;SG      | 50.00 (2)         | 50.00 (2)     | 100.00            | 100           |
| ADJ;INS;MASC;SG      | 0.00 (2)          | 0.00 (2)      | 100.00            | 100           |
| ADJ;ESS;NEUT;SG      | 50.00 (2)         | 50.00 (2)     | 100.00            | 100           |
| ADJ;GEN;PL           | 50.00 (2)         | 50.00 (2)     | 100.00            | 100           |
| ACC;ADJ;PL           | 50.00 (2)         | 50.00 (2)     | 100.00            | 100           |
| ACC;ADJ;MASC;SG      | 50.00 (2)         | 50.00 (2)     | 100.00            | 100           |
| ACC;ADJ;INAN;MASC;SG | 50.00 (2)         | 50.00 (2)     | 100.00            | 100           |
| ADJ;ESS;FEM;SG       | 50.00 (2)         | 50.00 (2)     | 100.00            | 100           |
| ADJ;ESS;PL           | 50.00 (2)         | 50.00 (2)     | 100.00            | 100           |
| ADJ;DAT;NEUT;SG      | 50.00 (2)         | 50.00 (2)     | 100.00            | 100           |
| ADJ;DAT;FEM;SG       | 50.00 (2)         | 50.00 (2)     | 100.00            | 100           |

Table 45: The performance of Artetxe et al. (2016)’s model on translating words belonging to a specific morphological category for the Ukrainian–Polish language pair (the grey numbers correspond to the dictionary sizes).



| Ukrainian–Russian    |                   |               |                   |               |
|----------------------|-------------------|---------------|-------------------|---------------|
| Morph                | Normal (In vocab) | Normal (+OOV) | Lexeme (In vocab) | Lexeme (+OOV) |
| ALL                  | 61.32 (786)       | 56.48 (933)   | 90.46             | 89.82         |
| ESS;N;SG             | 57.95 (88)        | 54.55 (99)    | 86.36             | 83.84         |
| INS;N;PL             | 75.00 (76)        | 62.24 (98)    | 98.68             | 100           |
| ACC;N;SG             | 65.98 (97)        | 64.65 (99)    | 92.78             | 90.91         |
| GEN;N;PL             | 60.23 (88)        | 54.08 (98)    | 85.23             | 78.57         |
| GEN;N;SG             | 67.71 (96)        | 65.66 (99)    | 91.67             | 88.89         |
| DAT;N;PL             | 69.81 (53)        | 60.20 (98)    | 92.45             | 96.94         |
| N;NOM;SG             | 61.62 (99)        | 61.62 (99)    | 88.89             | 88.89         |
| INS;N;SG             | 68.82 (93)        | 64.65 (99)    | 97.85             | 95.96         |
| N;NOM;PL             | 65.98 (97)        | 65.31 (98)    | 87.63             | 87.76         |
| DAT;N;SG             | 53.41 (88)        | 48.48 (99)    | 79.55             | 74.75         |
| ESS;N;PL             | 72.73 (55)        | 58.16 (98)    | 98.18             | 96.94         |
| ACC;N;PL             | 54.24 (59)        | 54.10 (61)    | 81.36             | 83.61         |
| ADJ;FEM;NOM;SG       | 0.00 (2)          | 0.00 (2)      | 100               | 100           |
| ACC;ADJ;NEUT;SG      | 0.00 (2)          | 0.00 (2)      | 100               | 100           |
| ACC;ADJ;FEM;SG       | 0.00 (2)          | 0.00 (2)      | 100               | 100           |
| ADJ;DAT;PL           | 0.00 (2)          | 0.00 (2)      | 100               | 100           |
| ADJ;ESS;NEUT;SG      | 0.00 (1)          | 0.00 (2)      | 100               | 100           |
| ADJ;MASC;NOM;SG      | 0.00 (2)          | 0.00 (2)      | 50                | 50            |
| ADJ;FEM;GEN;SG       | 0.00 (2)          | 0.00 (2)      | 100               | 100           |
| ADJ;ESS;FEM;SG       | 0.00 (2)          | 0.00 (2)      | 50                | 50            |
| ACC;ADJ;INAN;MASC;SG | 0.00 (2)          | 0.00 (2)      | 50                | 50            |
| ADJ;NOM;PL           | 0.00 (2)          | 0.00 (2)      | 100               | 100           |
| ACC;ADJ;MASC;SG      | 0.00 (2)          | 0.00 (2)      | 100               | 100           |
| ADJ;DAT;FEM;SG       | 0.00 (2)          | 0.00 (2)      | 50                | 50            |
| ADJ;INS;PL           | 0.00 (2)          | 0.00 (2)      | 100               | 100           |
| ADJ;INS;MASC;SG      | 0.00 (2)          | 0.00 (2)      | 100               | 100           |
| ADJ;GEN;NEUT;SG      | 0.00 (2)          | 0.00 (2)      | 100               | 100           |
| ADJ;FEM;INS;SG       | 0.00 (2)          | 0.00 (2)      | 50                | 50            |
| ACC;ADJ;INAN;PL      | 0.00 (2)          | 0.00 (2)      | 100               | 100           |
| ADJ;ESS;PL           | 0.00 (2)          | 0.00 (2)      | 100               | 100           |
| ADJ;GEN;PL           | 0.00 (2)          | 0.00 (2)      | 100               | 100           |
| ADJ;NEUT;NOM;SG      | 0.00 (2)          | 0.00 (2)      | 100               | 100           |
| ADJ;INS;NEUT;SG      | 0.00 (2)          | 0.00 (2)      | 100               | 100           |
| ADJ;ESS;MASC;SG      | 0.00 (1)          | 0.00 (2)      | 100               | 100           |
| ADJ;DAT;MASC;SG      | 0.00 (1)          | 0.00 (2)      | 100               | 100           |
| ACC;ADJ;PL           | 0.00 (2)          | 0.00 (2)      | 100               | 100           |
| ADJ;DAT;NEUT;SG      | 0.00 (1)          | 0.00 (2)      | 100               | 100           |
| ADJ;GEN;MASC;SG      | 0.00 (2)          | 0.00 (2)      | 100               | 100           |
| 1;FEM;PST;SG;V       | 66.67 (3)         | 66.67 (3)     | 100               | 100           |
| 2;MASC;PST;SG;V      | 66.67 (3)         | 66.67 (3)     | 100               | 100           |
| 2;IMP;SG;V           | 0.00 (3)          | 0.00 (3)      | 33.33             | 33.33         |
| 2;FEM;PL;PST;V       | 66.67 (3)         | 66.67 (3)     | 100               | 100           |
| 3;PL;PRS;V           | 66.67 (3)         | 66.67 (3)     | 100               | 100           |
| 1;PRS;SG;V           | 0.00 (3)          | 0.00 (3)      | 33.33             | 33.33         |
| 2;MASC;PL;PST;V      | 66.67 (3)         | 66.67 (3)     | 100               | 100           |
| 2;PRS;SG;V           | 0.00 (2)          | 0.00 (3)      | 100               | 100           |
| 1;FEM;PL;PST;V       | 66.67 (3)         | 66.67 (3)     | 100               | 100           |
| 1;PL;PRS;V           | 0.00 (2)          | 0.00 (3)      | 50                | 66.67         |
| NFIN;V               | 66.67 (3)         | 66.67 (3)     | 100               | 100           |
| 1;MASC;PST;SG;V      | 66.67 (3)         | 66.67 (3)     | 100               | 100           |
| 2;IMP;PL;V           | 0.00 (2)          | 0.00 (3)      | 100               | 100           |
| 3;PRS;SG;V           | 66.67 (3)         | 66.67 (3)     | 100               | 100           |
| 1;MASC;PL;PST;V      | 66.67 (3)         | 66.67 (3)     | 100               | 100           |
| 3;NEUT;PST;SG;V      | 66.67 (3)         | 66.67 (3)     | 100               | 100           |
| 2;PL;PRS;V           | 0.00 (2)          | 0.00 (3)      | 50                | 66.67         |
| 2;FEM;PST;SG;V       | 66.67 (3)         | 66.67 (3)     | 100               | 100           |
| 3;MASC;PL;PST;V      | 66.67 (3)         | 66.67 (3)     | 100               | 100           |
| 3;MASC;PST;SG;V      | 66.67 (3)         | 66.67 (3)     | 100               | 100           |
| 3;FEM;PST;SG;V       | 66.67 (3)         | 66.67 (3)     | 100               | 100           |
| 3;FEM;PL;PST;V       | 66.67 (3)         | 66.67 (3)     | 100               | 100           |

Table 46: The performance of Artetxe et al. (2016)’s model on translating words belonging to a specific morphological category for the Ukrainian–Russian language pair (the grey numbers correspond to the dictionary sizes).

| Ukrainian–Slovak     |                   |               |                   |               |
|----------------------|-------------------|---------------|-------------------|---------------|
| Morph                | Normal (In vocab) | Normal (+OOV) | Lexeme (In vocab) | Lexeme (+OOV) |
| ALL                  | 18.63 (322)       | 15.71 (420)   | 84.78             | 83.57         |
| ESS;N;SG             | 21.21 (33)        | 15.56 (45)    | 84.85             | 71.11         |
| ACC;N;SG             | 26.19 (42)        | 23.91 (46)    | 83.33             | 80.43         |
| ACC;N;PL             | 17.07 (41)        | 15.56 (45)    | 85.37             | 82.22         |
| GEN;N;PL             | 13.16 (38)        | 10.87 (46)    | 73.68             | 69.57         |
| N;NOM;PL             | 16.67 (42)        | 15.56 (45)    | 85.71             | 84.44         |
| ESS;N;PL             | 22.73 (22)        | 15.56 (45)    | 100               | 93.33         |
| N;NOM;SG             | 15.56 (45)        | 15.22 (46)    | 71.11             | 69.57         |
| INS;N;PL             | 16.67 (30)        | 11.11 (45)    | 100               | 100           |
| DAT;N;PL             | 25.00 (20)        | 17.78 (45)    | 95                | 93.33         |
| DAT;N;SG             | 18.92 (37)        | 17.39 (46)    | 81.08             | 76.09         |
| INS;N;SG             | 15.79 (38)        | 15.22 (46)    | 86.84             | 89.13         |
| GEN;N;SG             | 22.73 (44)        | 23.91 (46)    | 84.09             | 82.61         |
| NFIN;V               | 50.00 (2)         | 50.00 (2)     | 100               | 100           |
| ACC;ADJ;NEUT;SG      | 0.00 (1)          | 0.00 (1)      | 100               | 100           |
| ADJ;GEN;PL           | 0.00 (1)          | 0.00 (1)      | 100               | 100           |
| ADJ;FEM;INS;SG       | 0.00 (1)          | 0.00 (1)      | 100               | 100           |
| ADJ;DAT;MASC;SG      | 0.00 (1)          | 0.00 (1)      | 100               | 100           |
| ADJ;DAT;NEUT;SG      | 0.00 (1)          | 0.00 (1)      | 100               | 100           |
| ADJ;FEM;NOM;SG       | 0.00 (1)          | 0.00 (1)      | 100               | 100           |
| ADJ;DAT;FEM;SG       | 0.00 (1)          | 0.00 (1)      | 100               | 100           |
| ADJ;ESS;MASC;SG      | 0.00 (1)          | 0.00 (1)      | 100               | 100           |
| ACC;ADJ;MASC;SG      | 0.00 (1)          | 0.00 (1)      | 100               | 100           |
| ACC;ADJ;PL           | 0.00 (1)          | 0.00 (1)      | 100               | 100           |
| ADJ;INS;MASC;SG      | 0.00 (1)          | 0.00 (1)      | 100               | 100           |
| ADJ;INS;PL           | 100.00 (1)        | 0.00 (1)      | 100               | 100           |
| ADJ;FEM;GEN;SG       | 0.00 (1)          | 0.00 (1)      | 100               | 100           |
| ADJ;DAT;PL           | 0.00 (1)          | 0.00 (1)      | 100               | 100           |
| ADJ;MASC;NOM;SG      | 0.00 (1)          | 0.00 (1)      | 100               | 100           |
| ACC;ADJ;FEM;SG       | 0.00 (1)          | 0.00 (1)      | 100               | 100           |
| ADJ;NEUT;NOM;SG      | 0.00 (1)          | 0.00 (1)      | 100               | 100           |
| ADJ;INS;NEUT;SG      | 0.00 (1)          | 0.00 (1)      | 100               | 100           |
| ADJ;NOM;PL           | 0.00 (1)          | 0.00 (1)      | 100               | 100           |
| ADJ;ESS;FEM;SG       | 0.00 (1)          | 0.00 (1)      | 100               | 100           |
| ADJ;GEN;NEUT;SG      | 0.00 (1)          | 0.00 (1)      | 100               | 100           |
| ACC;ADJ;INAN;MASC;SG | 0.00 (1)          | 0.00 (1)      | 100               | 100           |
| ADJ;ESS;NEUT;SG      | 0.00 (1)          | 0.00 (1)      | 100               | 100           |
| ADJ;ESS;PL           | 0.00 (1)          | 0.00 (1)      | 100               | 100           |
| ADJ;GEN;MASC;SG      | 0.00 (1)          | 0.00 (1)      | 100               | 100           |

Table 47: The performance of [Artetxe et al. \(2016\)](#)’s model on translating words belonging to a specific morphological category for the Ukrainian–Slovak language pair (the grey numbers correspond to the dictionary sizes).

| Polish–Spanish       |                   |               |                   |               |
|----------------------|-------------------|---------------|-------------------|---------------|
| Morph                | Normal (In vocab) | Normal (+OOV) | Lexeme (In vocab) | Lexeme (+OOV) |
| ALL                  | 38.01 (8964)      | 29.92 (12759) | 80.82             | 71.62         |
| ACC;N;PL             | 40.27 (827)       | 38.12 (884)   | 84.89             | 82.69         |
| ACC;N;SG             | 40.89 (922)       | 39.40 (962)   | 82.43             | 81.81         |
| DAT;N;PL             | 25.99 (304)       | 16.23 (881)   | 61.84             | 56.87         |
| DAT;N;SG             | 31.89 (599)       | 23.20 (961)   | 73.12             | 68.26         |
| ESS;N;PL             | 35.87 (552)       | 28.60 (881)   | 87.50             | 83.54         |
| ESS;N;SG             | 33.29 (766)       | 28.99 (959)   | 73.76             | 70.28         |
| GEN;N;PL             | 43.09 (782)       | 38.90 (887)   | 85.29             | 81.62         |
| GEN;N;SG             | 40.09 (933)       | 38.98 (962)   | 85.10             | 84.72         |
| INS;N;PL             | 33.12 (622)       | 27.13 (881)   | 88.91             | 88.42         |
| INS;N;SG             | 37.04 (837)       | 33.58 (962)   | 81.36             | 79.52         |
| N;NOM;PL             | 39.47 (826)       | 37.37 (883)   | 85.59             | 83.58         |
| N;NOM;SG             | 41.05 (950)       | 40.75 (962)   | 83.58             | 83.16         |
| N;PL;VOC             | 39.47 (826)       | 37.37 (883)   | 85.59             | 83.58         |
| N;SG;VOC             | 32.80 (561)       | 27.89 (961)   | 74.33             | 71.07         |
| 1;COND;FEM;PL;V      | -                 | 4.17 (48)     | -                 | 33.33         |
| 1;COND;FEM;SG;V      | 0.00 (1)          | 2.08 (48)     | 0.00              | 2.08          |
| 1;COND;MASC;PL;V     | 50.00 (4)         | 25.00 (48)    | 75.00             | 77.08         |
| 1;COND;MASC;SG;V     | 0.00 (8)          | 0.00 (48)     | 12.50             | 0             |
| 1;FEM;PL;PST;V       | -                 | 0.00 (62)     | -                 | 9.68          |
| 1;FEM;PST;SG;V       | 18.75 (16)        | 8.06 (62)     | 31.25             | 14.52         |
| 1;IMP;PL;V           | 12.50 (8)         | 6.25 (48)     | 25.00             | 16.67         |
| 1;MASC;PL;PST;V      | 38.46 (13)        | 11.29 (62)    | 69.23             | 40.32         |
| 1;MASC;PST;SG;V      | 10.00 (30)        | 4.84 (62)     | 33.33             | 9.68          |
| 1;PL;PRS;V           | 34.48 (29)        | 27.08 (48)    | 65.52             | 52.08         |
| 1;PRS;SG;V           | 10.81 (37)        | 8.33 (48)     | 16.22             | 10.42         |
| 2;COND;FEM;PL;V      | -                 | 4.17 (48)     | -                 | 12.5          |
| 2;COND;FEM;SG;V      | 0.00 (1)          | 0.00 (48)     | 0.00              | 4.17          |
| 2;COND;MASC;PL;V     | -                 | 4.17 (48)     | -                 | 22.92         |
| 2;COND;MASC;SG;V     | 0.00 (2)          | 0.00 (48)     | 0.00              | 2.08          |
| 2;FEM;PL;PST;V       | -                 | 0.00 (62)     | -                 | 0             |
| 2;FEM;PST;SG;V       | 0.00 (4)          | 6.45 (62)     | 25.00             | 11.29         |
| 2;IMP;PL;V           | 0.00 (6)          | 0.00 (48)     | 0.00              | 0             |
| 2;IMP;SG;V           | 8.00 (25)         | 6.25 (48)     | 8.00              | 10.42         |
| 2;MASC;PL;PST;V      | 0.00 (1)          | 0.00 (62)     | 0.00              | 1.61          |
| 2;MASC;PST;SG;V      | 10.00 (10)        | 4.84 (62)     | 20.00             | 8.06          |
| 2;PL;PRS;V           | 0.00 (9)          | 0.00 (48)     | 0.00              | 0             |
| 2;PRS;SG;V           | 8.70 (23)         | 6.25 (48)     | 21.74             | 6.25          |
| 3;COND;FEM;PL;V      | 25.00 (8)         | 18.75 (48)    | 75.00             | 52.08         |
| 3;COND;FEM;SG;V      | 0.00 (9)          | 12.50 (48)    | 55.56             | 29.17         |
| 3;COND;MASC;PL;V     | 0.00 (4)          | 0.00 (48)     | 25.00             | 10.42         |
| 3;COND;MASC;SG;V     | 33.33 (12)        | 16.67 (48)    | 41.67             | 27.08         |
| 3;COND;NEUT;SG;V     | 14.29 (7)         | 14.58 (48)    | 42.86             | 20.83         |
| 3;FEM;PL;PST;V       | 48.84 (43)        | 45.16 (62)    | 76.74             | 79.03         |
| 3;FEM;PST;SG;V       | 50.98 (51)        | 45.16 (62)    | 78.43             | 72.58         |
| 3;MASC;PL;PST;V      | 30.61 (49)        | 27.42 (62)    | 73.47             | 66.13         |
| 3;MASC;PST;SG;V      | 37.04 (54)        | 33.87 (62)    | 72.22             | 69.35         |
| 3;NEUT;PST;SG;V      | 19.05 (42)        | 20.97 (62)    | 42.86             | 41.94         |
| 3;PL;PRS;V           | 52.38 (42)        | 47.92 (48)    | 78.57             | 75            |
| 3;PRS;SG;V           | 43.48 (46)        | 41.67 (48)    | 60.87             | 58.33         |
| NFIN;V               | 38.30 (47)        | 37.50 (48)    | 95.74             | 95.83         |
| ACC;ADJ;FEM;SG       | 49.72 (177)       | 47.34 (188)   | 85.88             | 86.17         |
| ACC;ADJ;INAN;MASC;SG | 47.34 (188)       | 46.32 (190)   | 88.30             | 87.89         |
| ACC;ADJ;MASC;PL      | 53.63 (179)       | 50.26 (189)   | 98.88             | 98.94         |
| ACC;ADJ;MASC;SG      | 42.08 (183)       | 40.53 (190)   | 84.15             | 84.21         |
| ACC;ADJ;PL           | 51.35 (185)       | 49.74 (189)   | 91.35             | 91.53         |
| ADJ;DAT;FEM;SG       | 43.50 (177)       | 41.49 (188)   | 80.23             | 80.32         |
| ADJ;DAT;MASC;SG      | 31.73 (104)       | 24.21 (190)   | 71.15             | 72.11         |
| ADJ;DAT;PL           | 51.67 (180)       | 49.21 (189)   | 97.78             | 97.88         |
| ADJ;ESS;FEM;SG       | 43.50 (177)       | 41.49 (188)   | 80.23             | 80.32         |
| ADJ;ESS;MASC;SG      | 51.38 (181)       | 48.95 (190)   | 97.79             | 97.89         |
| ADJ;ESS;PL           | 53.63 (179)       | 50.26 (189)   | 98.88             | 98.94         |
| ADJ;FEM;GEN;SG       | 43.50 (177)       | 41.49 (188)   | 80.23             | 80.32         |
| ADJ;FEM;INS;SG       | 49.72 (177)       | 47.34 (188)   | 85.88             | 86.17         |
| ADJ;FEM;NOM;SG       | 46.70 (182)       | 45.21 (188)   | 90.11             | 90.43         |
| ADJ;GEN;MASC;SG      | 42.08 (183)       | 40.53 (190)   | 84.15             | 84.21         |
| ADJ;GEN;PL           | 53.63 (179)       | 50.26 (189)   | 98.88             | 98.94         |
| ADJ;INS;MASC;SG      | 51.38 (181)       | 48.95 (190)   | 97.79             | 97.89         |
| ADJ;INS;PL           | 57.42 (155)       | 51.32 (189)   | 98.06             | 98.41         |
| ADJ;MASC;NOM;PL      | 39.32 (117)       | 34.39 (189)   | 83.76             | 82.01         |
| ADJ;MASC;NOM;SG      | 47.34 (188)       | 46.32 (190)   | 88.30             | 87.89         |
| ADJ;NOM;PL           | 51.35 (185)       | 49.74 (189)   | 91.35             | 91.53         |

Table 48: The performance of [Artetxe et al. \(2016\)](#)’s model on translating words belonging to a specific morphological category for the Polish–Spanish language pair (the grey numbers correspond to the dictionary sizes).

| Morph           | Spanish–Polish    |               |                   |               |
|-----------------|-------------------|---------------|-------------------|---------------|
|                 | Normal (In vocab) | Normal (+OOV) | Lexeme (In vocab) | Lexeme (+OOV) |
| ALL             | 29.74 (4270)      | 22.26 (6095)  | 83.61             | 67.83         |
| N;PL            | 34.24 (1139)      | 32.30 (1226)  | 89.38             | 91.03         |
| N;SG            | 32.45 (1316)      | 31.84 (1338)  | 87.39             | 86.62         |
| ADJ;FEM;PL      | 40.85 (235)       | 39.92 (238)   | 95.74             | 95.8          |
| ADJ;FEM;SG      | 36.44 (236)       | 35.83 (240)   | 90.25             | 89.58         |
| ADJ;MASC;PL     | 41.10 (236)       | 40.33 (243)   | 96.19             | 95.88         |
| ADJ;MASC;SG     | 36.63 (243)       | 36.63 (243)   | 92.18             | 92.59         |
| 1;COND;PL;V     | 50.00 (2)         | 18.02 (111)   | 100.00            | 88.29         |
| 1;COND;SG;V     | 7.41 (27)         | 14.41 (111)   | 44.44             | 61.26         |
| 1;IMP;PL;POS;V  | 4.55 (22)         | 0.86 (116)    | 18.18             | 12.93         |
| 1;IPFV;PL;PST;V | 38.46 (13)        | 15.32 (111)   | 84.62             | 80.18         |
| 1;IPFV;PST;SG;V | 24.19 (62)        | 21.62 (111)   | 79.03             | 65.77         |
| 1;PFV;PL;PST;V  | 11.54 (26)        | 13.51 (111)   | 73.08             | 68.47         |
| 1;PFV;PST;SG;V  | 9.52 (42)         | 4.50 (111)    | 59.52             | 31.53         |
| 1;PL;PRS;V      | 18.37 (49)        | 16.30 (92)    | 83.67             | 77.17         |
| 1;PRS;SG;V      | 12.70 (63)        | 10.99 (91)    | 47.62             | 32.97         |
| 2;COND;PL;V     | -                 | 0.90 (111)    | -                 | 12.61         |
| 2;COND;SG;V     | 100.00 (1)        | 4.50 (111)    | 100.00            | 17.12         |
| 2;IMP;PL;POS;V  | 0.00 (17)         | 0.00 (116)    | 11.76             | 6.03          |
| 2;IMP;POS;SG;V  | 25.00 (84)        | 20.69 (116)   | 44.05             | 43.97         |
| 2;IPFV;PL;PST;V | -                 | 0.90 (111)    | -                 | 1.8           |
| 2;IPFV;PST;SG;V | 0.00 (11)         | 1.80 (111)    | 27.27             | 14.41         |
| 2;PFV;PL;PST;V  | -                 | 0.00 (111)    | -                 | 0             |
| 2;PFV;PST;SG;V  | 6.67 (15)         | 9.91 (111)    | 60.00             | 51.35         |
| 2;PL;PRS;V      | 0.00 (13)         | 0.00 (92)     | 0.00              | 3.26          |
| 2;PRS;SG;V      | 18.18 (44)        | 8.70 (92)     | 27.27             | 14.13         |
| 3;COND;PL;V     | 15.79 (19)        | 8.11 (111)    | 63.16             | 32.43         |
| 3;COND;SG;V     | 10.53 (38)        | 14.41 (111)   | 50.00             | 61.26         |
| 3;IPFV;PL;PST;V | 25.00 (92)        | 21.62 (111)   | 77.17             | 68.47         |
| 3;IPFV;PST;SG;V | 23.71 (97)        | 21.62 (111)   | 76.29             | 65.77         |
| 3;PFV;PL;PST;V  | 16.48 (91)        | 14.41 (111)   | 90.11             | 85.59         |
| 3;PFV;PST;SG;V  | 12.12 (99)        | 10.81 (111)   | 75.76             | 68.47         |
| 3;PL;PRS;V      | 23.17 (82)        | 20.65 (92)    | 79.27             | 73.91         |
| 3;PRS;SG;V      | 25.00 (88)        | 23.91 (92)    | 54.55             | 52.17         |
| NFIN;V          | 19.64 (112)       | 19.83 (116)   | 97.32             | 92.24         |
| 1;FUT;PL;V      | 25.00 (12)        | 11.11 (36)    | 100.00            | 63.89         |
| 1;FUT;SG;V      | 0.00 (14)         | 2.78 (36)     | 21.43             | 13.89         |
| 2;FUT;PL;V      | 0.00 (1)          | 0.00 (36)     | 0.00              | 0             |
| 2;FUT;SG;V      | 0.00 (5)          | 5.56 (36)     | 60.00             | 25            |
| 3;FUT;PL;V      | 11.76 (17)        | 5.56 (36)     | 64.71             | 61.11         |
| 3;FUT;SG;V      | 14.29 (28)        | 11.11 (36)    | 64.29             | 47.22         |

Table 49: The performance of Artetxe et al. (2016)’s model on translating words belonging to a specific morphological category for the Spanish–Polish language pair (the grey numbers correspond to the dictionary sizes).

| Czech–Polish         |                   |               |                   |               |
|----------------------|-------------------|---------------|-------------------|---------------|
| Morph                | Normal (In vocab) | Normal (+OOV) | Lexeme (In vocab) | Lexeme (+OOV) |
| ALL                  | 51.66 (3161)      | 42.87 (4166)  | 84.15             | 78.06         |
| ACC;ADJ;NEUT;SG      | 55.88 (68)        | 53.52 (71)    | 94.12             | 92.96         |
| ADJ;GEN;PL           | 53.97 (63)        | 49.30 (71)    | 98.41             | 98.59         |
| ADJ;GEN;MASC;SG      | 52.31 (65)        | 47.89 (71)    | 98.46             | 98.59         |
| ADJ;ESS;MASC;SG      | 42.86 (56)        | 33.80 (71)    | 80.36             | 78.87         |
| ADJ;FEM;INS;SG       | 16.67 (6)         | 16.67 (6)     | 66.67             | 66.67         |
| ADJ;NOM;PL           | 16.67 (6)         | 16.67 (6)     | 66.67             | 66.67         |
| ACC;ADJ;FEM;SG       | 55.22 (67)        | 53.52 (71)    | 95.52             | 95.77         |
| ADJ;INS;NEUT;SG      | 20.00 (5)         | 16.67 (6)     | 100               | 100           |
| ADJ;DAT;FEM;SG       | 55.88 (68)        | 53.52 (71)    | 94.12             | 92.96         |
| ADJ;DAT;MASC;SG      | 68.29 (41)        | 46.48 (71)    | 100               | 100           |
| ADJ;DAT;PL           | 44.62 (65)        | 42.25 (71)    | 100               | 100           |
| ADJ;ESS;FEM;SG       | 55.88 (68)        | 53.52 (71)    | 94.12             | 92.96         |
| ADJ;INS;MASC;SG      | 44.62 (65)        | 42.25 (71)    | 100               | 100           |
| ADJ;ESS;NEUT;SG      | 52.63 (57)        | 42.25 (71)    | 94.74             | 92.96         |
| ADJ;INS;PL           | 52.73 (55)        | 45.07 (71)    | 100               | 100           |
| ACC;ADJ;PL           | 16.67 (6)         | 16.67 (6)     | 66.67             | 66.67         |
| ADJ;ESS;PL           | 53.97 (63)        | 49.30 (71)    | 98.41             | 98.59         |
| ADJ;FEM;GEN;SG       | 55.88 (68)        | 53.52 (71)    | 94.12             | 92.96         |
| ACC;ADJ;MASC;SG      | 52.31 (65)        | 47.89 (71)    | 98.46             | 98.59         |
| ADJ;GEN;NEUT;SG      | 52.31 (65)        | 47.89 (71)    | 98.46             | 98.59         |
| ADJ;DAT;NEUT;SG      | 68.29 (41)        | 46.48 (71)    | 100               | 100           |
| GEN;N;SG             | 56.82 (352)       | 56.90 (355)   | 84.94             | 84.79         |
| ACC;N;PL             | 58.18 (330)       | 56.10 (344)   | 87.88             | 86.92         |
| INS;N;PL             | 63.12 (263)       | 50.87 (346)   | 93.54             | 91.04         |
| DAT;N;SG             | 48.72 (273)       | 44.76 (353)   | 71.06             | 68.27         |
| N;NOM;PL             | 57.66 (333)       | 55.62 (347)   | 88.29             | 87.03         |
| ESS;N;PL             | 62.45 (229)       | 49.28 (345)   | 93.01             | 93.62         |
| N;SG;VOC             | 51.59 (157)       | 35.31 (354)   | 70.06             | 55.08         |
| N;PL;VOC             | 57.53 (332)       | 55.33 (347)   | 88.25             | 86.74         |
| ACC;N;SG             | 52.45 (347)       | 51.27 (355)   | 76.95             | 76.34         |
| INS;N;SG             | 52.62 (325)       | 49.29 (353)   | 85.23             | 84.42         |
| GEN;N;PL             | 53.87 (310)       | 49.43 (348)   | 80.65             | 76.44         |
| ESS;N;SG             | 48.72 (312)       | 44.76 (353)   | 70.83             | 68.56         |
| N;NOM;SG             | 51.83 (355)       | 51.83 (355)   | 77.46             | 78.31         |
| DAT;N;PL             | 52.15 (163)       | 37.57 (346)   | 85.89             | 87.28         |
| ADJ;FEM;NOM;SG       | 56.45 (62)        | 53.85 (65)    | 95.16             | 95.38         |
| ADJ;MASC;NOM;SG      | 58.06 (62)        | 56.92 (65)    | 96.77             | 98.46         |
| ACC;ADJ;INAN;MASC;SG | 58.06 (62)        | 56.92 (65)    | 96.77             | 98.46         |
| ACC;ADJ;MASC;PL      | 59.68 (62)        | 56.92 (65)    | 96.77             | 95.38         |
| ADJ;MASC;NOM;PL      | 47.22 (36)        | 38.46 (65)    | 72.22             | 63.08         |
| ADJ;NEUT;NOM;SG      | 59.68 (62)        | 56.92 (65)    | 96.77             | 95.38         |
| 3;MASC;PST;SG;V      | 50.00 (38)        | 48.78 (41)    | 92.11             | 87.8          |
| 2;IMP;PL;V           | 0.00 (8)          | 5.00 (40)     | 37.5              | 12.5          |
| 1;PRS;SG;V           | 30.77 (13)        | 8.82 (34)     | 61.54             | 20.59         |
| 3;FEM;PL;PST;V       | 59.26 (27)        | 48.78 (41)    | 92.59             | 87.8          |
| 1;PL;PRS;V           | 42.86 (14)        | 17.65 (34)    | 85.71             | 58.82         |
| 3;PL;PRS;V           | 46.43 (28)        | 38.24 (34)    | 92.86             | 76.47         |
| 3;MASC;PL;PST;V      | 35.48 (31)        | 31.71 (41)    | 93.55             | 90.24         |
| 3;NEUT;PST;SG;V      | 66.67 (27)        | 53.66 (41)    | 96.3              | 95.12         |
| NFIN;V               | 40.00 (45)        | 39.13 (46)    | 95.56             | 95.65         |
| 2;PL;PRS;V           | 0.00 (5)          | 0.00 (34)     | 0                 | 0             |
| 3;PRS;SG;V           | 53.12 (32)        | 50.00 (34)    | 81.25             | 73.53         |
| 3;FEM;PST;SG;V       | 51.52 (33)        | 48.78 (41)    | 90.91             | 85.37         |
| 2;PRS;SG;V           | 14.29 (7)         | 11.76 (34)    | 42.86             | 23.53         |
| 2;IMP;SG;V           | 7.69 (13)         | 10.00 (40)    | 23.08             | 22.5          |
| 1;IMP;PL;V           | 33.33 (3)         | 5.00 (40)     | 33.33             | 15            |
| 2;FUT;PL;V           | 0.00 (1)          | 0.00 (9)      | 0                 | 0             |
| 1;FUT;SG;V           | 0.00 (5)          | 0.00 (9)      | 20                | 11.11         |
| 3;FUT;PL;V           | 0.00 (7)          | 0.00 (9)      | 42.86             | 44.44         |
| 1;FUT;PL;V           | 0.00 (3)          | 11.11 (9)     | 33.33             | 77.78         |
| 2;FUT;SG;V           | 0.00 (1)          | 0.00 (9)      | 100               | 22.22         |
| 3;FUT;SG;V           | 11.11 (9)         | 11.11 (9)     | 66.67             | 66.67         |

Table 50: The performance of Artetxe et al. (2017)’s model on translating words belonging to a specific morphological category for the Czech–Polish language pair (the grey numbers correspond to the dictionary sizes).

| Czech–Russian        |                   |               |                   |               |
|----------------------|-------------------|---------------|-------------------|---------------|
| Morph                | Normal (In vocab) | Normal (+OOV) | Lexeme (In vocab) | Lexeme (+OOV) |
| ALL                  | 44.86 (3562)      | 38.18 (4762)  | 84.81             | 81.06         |
| GEN;N;PL             | 44.23 (312)       | 39.45 (365)   | 76.28             | 70.68         |
| GEN;N;SG             | 49.04 (365)       | 48.26 (373)   | 84.66             | 83.65         |
| DAT;N;PL             | 56.15 (187)       | 42.74 (365)   | 95.19             | 93.15         |
| INS;N;SG             | 48.46 (324)       | 45.04 (373)   | 87.65             | 84.45         |
| ACC;N;PL             | 48.44 (225)       | 45.97 (248)   | 82.22             | 78.23         |
| N;NOM;PL             | 50.15 (335)       | 47.24 (362)   | 86.57             | 82.6          |
| N;NOM;SG             | 46.59 (367)       | 46.09 (371)   | 77.66             | 77.09         |
| DAT;N;SG             | 45.02 (311)       | 40.21 (373)   | 76.85             | 72.65         |
| ESS;N;SG             | 44.55 (312)       | 39.68 (373)   | 76.6              | 72.12         |
| INS;N;PL             | 47.27 (256)       | 38.63 (365)   | 86.72             | 84.38         |
| ESS;N;PL             | 48.08 (208)       | 39.73 (365)   | 94.23             | 94.25         |
| ACC;N;SG             | 44.51 (364)       | 43.43 (373)   | 76.65             | 75.6          |
| ADJ;DAT;MASC;SG      | 64.91 (57)        | 54.22 (83)    | 98.25             | 98.8          |
| ADJ;NEUT;NOM;SG      | 16.90 (71)        | 16.22 (74)    | 21.13             | 21.62         |
| ADJ;FEM;GEN;SG       | 16.05 (81)        | 15.66 (83)    | 24.69             | 25.3          |
| ACC;ADJ;INAN;MASC;SG | 59.72 (72)        | 58.11 (74)    | 93.06             | 93.24         |
| ADJ;INS;PL           | 68.12 (69)        | 61.45 (83)    | 100               | 100           |
| ADJ;ESS;PL           | 59.74 (77)        | 56.63 (83)    | 97.4              | 97.59         |
| ADJ;FEM;NOM;SG       | 63.89 (72)        | 63.51 (74)    | 94.44             | 94.59         |
| ADJ;DAT;PL           | 63.64 (77)        | 61.45 (83)    | 100               | 100           |
| ADJ;ESS;FEM;SG       | 16.05 (81)        | 15.66 (83)    | 24.69             | 25.3          |
| ADJ;DAT;NEUT;SG      | 64.91 (57)        | 54.22 (83)    | 98.25             | 98.8          |
| ADJ;GEN;PL           | 59.74 (77)        | 56.63 (83)    | 97.4              | 97.59         |
| ADJ;MASC;NOM;SG      | 59.72 (72)        | 58.11 (74)    | 93.06             | 93.24         |
| ADJ;GEN;MASC;SG      | 60.76 (79)        | 59.04 (83)    | 98.73             | 98.8          |
| ACC;ADJ;NEUT;SG      | 16.25 (80)        | 15.66 (83)    | 25                | 25.3          |
| ACC;ADJ;MASC;SG      | 60.76 (79)        | 59.04 (83)    | 98.73             | 98.8          |
| ADJ;GEN;NEUT;SG      | 60.76 (79)        | 59.04 (83)    | 98.73             | 98.8          |
| ADJ;DAT;FEM;SG       | 16.05 (81)        | 15.66 (83)    | 24.69             | 25.3          |
| ADJ;INS;MASC;SG      | 63.64 (77)        | 61.45 (83)    | 100               | 100           |
| ACC;ADJ;FEM;SG       | 62.50 (80)        | 61.45 (83)    | 95                | 95.18         |
| ADJ;ESS;MASC;SG      | 60.56 (71)        | 57.83 (83)    | 100               | 100           |
| ADJ;ESS;NEUT;SG      | 61.11 (72)        | 57.83 (83)    | 100               | 100           |
| 3;PRS;SG;V           | 27.78 (54)        | 26.79 (56)    | 92.59             | 87.5          |
| 2;PRS;SG;V           | 0.00 (7)          | 16.07 (56)    | 57.14             | 60.71         |
| 2;IMP;PL;V           | 17.65 (17)        | 11.69 (77)    | 88.24             | 68.83         |
| 1;PRS;SG;V           | 15.38 (13)        | 17.86 (56)    | 61.54             | 44.64         |
| 3;FEM;PST;SG;V       | 31.15 (61)        | 27.50 (80)    | 98.36             | 97.5          |
| 1;PL;PRS;V           | 21.43 (14)        | 12.50 (56)    | 78.57             | 67.86         |
| 3;NEUT;PST;SG;V      | 21.43 (42)        | 21.25 (80)    | 92.86             | 95            |
| 2;PL;PRS;V           | 27.27 (11)        | 16.07 (56)    | 81.82             | 80.36         |
| 3;MASC;PST;SG;V      | 28.57 (70)        | 27.50 (80)    | 92.86             | 87.5          |
| 3;PL;PRS;V           | 32.50 (40)        | 23.21 (56)    | 90                | 66.07         |
| NFIN;V               | 31.73 (104)       | 28.45 (116)   | 99.04             | 99.14         |
| 3;MASC;PL;PST;V      | 23.33 (60)        | 23.75 (80)    | 98.33             | 97.5          |
| 2;IMP;SG;V           | 20.00 (15)        | 7.79 (77)     | 26.67             | 20.78         |
| 3;FEM;PL;PST;V       | 8.93 (56)         | 10.00 (80)    | 82.14             | 77.5          |
| ADJ;FEM;INS;SG       | 11.11 (9)         | 11.11 (9)     | 55.56             | 55.56         |
| ADJ;NOM;PL           | 11.11 (9)         | 11.11 (9)     | 55.56             | 55.56         |
| ADJ;INS;NEUT;SG      | 33.33 (9)         | 33.33 (9)     | 100               | 100           |
| ACC;ADJ;PL           | 11.11 (9)         | 11.11 (9)     | 55.56             | 55.56         |
| 1;FUT;PL;V           | 0.00 (6)          | 3.85 (26)     | 66.67             | 42.31         |
| 3;FUT;SG;V           | 9.52 (21)         | 7.69 (26)     | 76.19             | 65.38         |
| 2;FUT;PL;V           | 0.00 (7)          | 0.00 (26)     | 100               | 61.54         |
| 1;FUT;SG;V           | 0.00 (7)          | 4.00 (25)     | 14.29             | 12            |
| 2;FUT;SG;V           | 0.00 (2)          | 7.69 (26)     | 50                | 50            |
| 3;FUT;PL;V           | 10.53 (19)        | 7.69 (26)     | 73.68             | 65.38         |
| ACC;INAN;N;SG        | 50.00 (2)         | 50.00 (2)     | 50                | 50            |
| ACC;INAN;N;PL        | 0.00 (2)          | 0.00 (2)      | 0                 | 0             |

Table 51: The performance of Artetxe et al. (2017)’s model on translating words belonging to a specific morphological category for the Czech–Russian language pair (the grey numbers correspond to the dictionary sizes).



| Czech–Slovak         |                   |               |                   |               |
|----------------------|-------------------|---------------|-------------------|---------------|
| Morph                | Normal (In vocab) | Normal (+OOV) | Lexeme (In vocab) | Lexeme (+OOV) |
| ALL                  | 60.85 (802)       | 54.24 (1027)  | 89.53             | 87.15         |
| ADJ;INS;MASC;SG      | 70.00 (10)        | 81.82 (11)    | 100.00            | 100           |
| ADJ;ESS;PL           | 63.64 (11)        | 63.64 (11)    | 100.00            | 100           |
| ADJ;DAT;NEUT;SG      | 75.00 (8)         | 81.82 (11)    | 100.00            | 100           |
| ADJ;ESS;FEM;SG       | 72.73 (11)        | 72.73 (11)    | 90.91             | 90.91         |
| ACC;ADJ;MASC;PL      | 72.73 (11)        | 72.73 (11)    | 90.91             | 90.91         |
| ADJ;MASC;NOM;SG      | 81.82 (11)        | 81.82 (11)    | 100.00            | 100           |
| ADJ;ESS;MASC;SG      | 62.50 (8)         | 54.55 (11)    | 87.50             | 72.73         |
| ADJ;GEN;NEUT;SG      | 72.73 (11)        | 72.73 (11)    | 100.00            | 100           |
| ADJ;DAT;PL           | 70.00 (10)        | 81.82 (11)    | 100.00            | 100           |
| ADJ;MASC;NOM;PL      | 57.14 (7)         | 54.55 (11)    | 85.71             | 81.82         |
| ACC;ADJ;INAN;MASC;SG | 81.82 (11)        | 81.82 (11)    | 100.00            | 100           |
| ADJ;GEN;MASC;SG      | 72.73 (11)        | 72.73 (11)    | 100.00            | 100           |
| ACC;ADJ;MASC;SG      | 72.73 (11)        | 72.73 (11)    | 100.00            | 100           |
| ACC;ADJ;NEUT;SG      | 72.73 (11)        | 72.73 (11)    | 90.91             | 90.91         |
| ADJ;ESS;NEUT;SG      | 75.00 (8)         | 81.82 (11)    | 100.00            | 100           |
| ADJ;NEUT;NOM;SG      | 72.73 (11)        | 72.73 (11)    | 90.91             | 90.91         |
| ADJ;INS;PL           | 75.00 (8)         | 81.82 (11)    | 100.00            | 100           |
| ADJ;GEN;PL           | 63.64 (11)        | 63.64 (11)    | 100.00            | 100           |
| ADJ;FEM;NOM;SG       | 72.73 (11)        | 72.73 (11)    | 100.00            | 100           |
| ADJ;DAT;MASC;SG      | 75.00 (8)         | 81.82 (11)    | 100.00            | 100           |
| ADJ;FEM;GEN;SG       | 72.73 (11)        | 72.73 (11)    | 90.91             | 90.91         |
| ADJ;DAT;FEM;SG       | 72.73 (11)        | 72.73 (11)    | 90.91             | 90.91         |
| ACC;ADJ;FEM;SG       | 63.64 (11)        | 63.64 (11)    | 100.00            | 90.91         |
| GEN;N;SG             | 62.89 (97)        | 61.39 (101)   | 84.54             | 86.14         |
| N;NOM;PL             | 59.78 (92)        | 57.69 (104)   | 89.13             | 87.5          |
| INS;N;SG             | 64.29 (84)        | 59.41 (101)   | 91.67             | 90.1          |
| N;NOM;SG             | 62.63 (99)        | 61.39 (101)   | 83.84             | 83.17         |
| ACC;N;SG             | 65.26 (95)        | 62.38 (101)   | 87.37             | 87.13         |
| ACC;N;PL             | 60.64 (94)        | 61.54 (104)   | 86.17             | 89.42         |
| DAT;N;SG             | 59.72 (72)        | 53.47 (101)   | 79.17             | 73.27         |
| INS;N;PL             | 61.67 (60)        | 53.40 (103)   | 90.00             | 90.29         |
| DAT;N;PL             | 43.14 (51)        | 32.04 (103)   | 82.35             | 82.52         |
| ESS;N;SG             | 61.33 (75)        | 54.46 (101)   | 80.00             | 73.27         |
| ESS;N;PL             | 65.45 (55)        | 49.51 (103)   | 98.18             | 96.12         |
| GEN;N;PL             | 51.16 (86)        | 47.12 (104)   | 84.88             | 79.81         |
| NFIN;V               | 60.71 (84)        | 58.95 (95)    | 100.00            | 100           |
| 3;FEM;PL;PST;V       | 0.00 (1)          | 0.00 (1)      | 100.00            | 100           |
| 1;PRS;SG;V           | -                 | 0.00 (1)      | -                 | 100           |
| 3;MASC;PL;PST;V      | 0.00 (1)          | 0.00 (1)      | 100.00            | 100           |
| 3;NEUT;PST;SG;V      | 0.00 (1)          | 0.00 (1)      | 100.00            | 100           |
| 3;MASC;PST;SG;V      | 0.00 (1)          | 0.00 (1)      | 100.00            | 100           |
| 1;PL;PRS;V           | 0.00 (1)          | 0.00 (1)      | 100.00            | 100           |
| 1;IMP;PL;V           | -                 | 0.00 (1)      | -                 | 0             |
| 3;FEM;PST;SG;V       | 0.00 (1)          | 0.00 (1)      | 100.00            | 100           |
| 2;IMP;PL;V           | -                 | 0.00 (1)      | -                 | 100           |
| 3;PRS;SG;V           | 0.00 (1)          | 0.00 (1)      | 100.00            | 100           |
| 2;IMP;SG;V           | -                 | 0.00 (1)      | -                 | 100           |
| 2;PL;PRS;V           | -                 | 0.00 (1)      | -                 | 0             |
| 2;PRS;SG;V           | -                 | 0.00 (1)      | -                 | 0             |
| 3;NEUT;PL;PST;V      | 0.00 (1)          | 0.00 (1)      | 100.00            | 100           |
| 3;PL;PRS;V           | 0.00 (1)          | 0.00 (1)      | 0.00              | 0             |

Table 52: The performance of Artetxe et al. (2017)’s model on translating words belonging to a specific morphological category for the Czech–Slovak language pair (the grey numbers correspond to the dictionary sizes).

| Czech–Ukrainian      |                   |               |                   |               |
|----------------------|-------------------|---------------|-------------------|---------------|
| Morph                | Normal (In vocab) | Normal (+OOV) | Lexeme (In vocab) | Lexeme (+OOV) |
| ALL                  | 48.14 (673)       | 39.81 (854)   | 82.91             | 79.39         |
| ACC;N;SG             | 50.00 (90)        | 47.37 (95)    | 83.33             | 82.11         |
| N;PL;VOC             | 46.07 (89)        | 43.62 (94)    | 82.02             | 79.79         |
| N;SG;VOC             | 42.86 (35)        | 23.40 (94)    | 80                | 59.57         |
| DAT;N;PL             | 61.40 (57)        | 44.68 (94)    | 96.49             | 96.81         |
| N;NOM;SG             | 45.74 (94)        | 45.26 (95)    | 86.17             | 84.21         |
| INS;N;SG             | 56.63 (83)        | 49.47 (95)    | 84.34             | 82.11         |
| ACC;N;PL             | 48.89 (90)        | 46.81 (94)    | 82.22             | 81.91         |
| INS;N;PL             | 44.74 (76)        | 37.23 (94)    | 84.21             | 84.04         |
| GEN;N;SG             | 49.45 (91)        | 47.37 (95)    | 82.42             | 82.11         |
| GEN;N;PL             | 54.12 (85)        | 48.42 (95)    | 82.35             | 78.95         |
| N;NOM;PL             | 45.56 (90)        | 43.62 (94)    | 82.22             | 80.85         |
| ESS;N;SG             | 43.90 (82)        | 37.89 (95)    | 70.73             | 65.26         |
| DAT;N;SG             | 43.75 (80)        | 36.84 (95)    | 70                | 65.26         |
| ESS;N;PL             | 56.67 (60)        | 41.49 (94)    | 86.67             | 89.36         |
| 3;PL;PRS;V           | 0.00 (2)          | 0.00 (3)      | 50                | 33.33         |
| 3;PRS;SG;V           | 66.67 (3)         | 66.67 (3)     | 100               | 100           |
| 1;PRS;SG;V           | 50.00 (2)         | 33.33 (3)     | 100               | 66.67         |
| 3;NEUT;PST;SG;V      | 0.00 (2)          | 0.00 (3)      | 100               | 100           |
| 3;FEM;PST;SG;V       | 33.33 (3)         | 33.33 (3)     | 100               | 100           |
| 3;FEM;PL;PST;V       | 0.00 (3)          | 0.00 (3)      | 0                 | 0             |
| NFIN;V               | 33.33 (3)         | 33.33 (3)     | 100               | 100           |
| 3;MASC;PL;PST;V      | 0.00 (3)          | 0.00 (3)      | 66.67             | 66.67         |
| 2;IMP;SG;V           | 0.00 (3)          | 0.00 (3)      | 33.33             | 33.33         |
| 2;PL;PRS;V           | 0.00 (2)          | 0.00 (3)      | 100               | 66.67         |
| 2;PRS;SG;V           | 0.00 (2)          | 0.00 (3)      | 50                | 33.33         |
| 2;IMP;PL;V           | 0.00 (3)          | 0.00 (3)      | 100               | 100           |
| 1;PL;PRS;V           | 50.00 (2)         | 0.00 (3)      | 100               | 100           |
| 1;IMP;PL;V           | 0.00 (1)          | 0.00 (3)      | 0                 | 0             |
| 3;MASC;PST;SG;V      | 50.00 (2)         | 50.00 (2)     | 100               | 100           |
| ADJ;FEM;GEN;SG       | 0.00 (1)          | 0.00 (1)      | 100               | 100           |
| ADJ;GEN;NEUT;SG      | 0.00 (1)          | 0.00 (1)      | 100               | 100           |
| ADJ;DAT;PL           | 0.00 (1)          | 0.00 (1)      | 100               | 100           |
| ADJ;ESS;PL           | 0.00 (1)          | 0.00 (1)      | 100               | 100           |
| ACC;ADJ;MASC;SG      | 0.00 (1)          | 0.00 (1)      | 100               | 100           |
| ACC;ADJ;NEUT;SG      | 0.00 (1)          | 0.00 (1)      | 100               | 100           |
| ADJ;GEN;PL           | 0.00 (1)          | 0.00 (1)      | 100               | 100           |
| ADJ;INS;MASC;SG      | 0.00 (1)          | 0.00 (1)      | 100               | 100           |
| ACC;ADJ;FEM;SG       | 0.00 (1)          | 0.00 (1)      | 100               | 100           |
| ACC;ADJ;INAN;MASC;SG | 0.00 (1)          | 0.00 (1)      | 100               | 100           |
| ADJ;MASC;NOM;SG      | 0.00 (1)          | 0.00 (1)      | 100               | 100           |
| ADJ;DAT;FEM;SG       | 0.00 (1)          | 0.00 (1)      | 100               | 100           |
| ADJ;NEUT;NOM;SG      | 0.00 (1)          | 0.00 (1)      | 100               | 100           |
| ADJ;ESS;NEUT;SG      | 0.00 (1)          | 0.00 (1)      | 100               | 100           |
| ADJ;FEM;NOM;SG       | 0.00 (1)          | 0.00 (1)      | 100               | 100           |
| ADJ;DAT;NEUT;SG      | 0.00 (1)          | 0.00 (1)      | 100               | 100           |
| ADJ;INS;PL           | 0.00 (1)          | 0.00 (1)      | 100               | 100           |
| ADJ;DAT;MASC;SG      | 0.00 (1)          | 0.00 (1)      | 100               | 100           |
| ADJ;GEN;MASC;SG      | 0.00 (1)          | 0.00 (1)      | 100               | 100           |
| ADJ;ESS;MASC;SG      | 0.00 (1)          | 0.00 (1)      | 100               | 100           |
| ADJ;ESS;FEM;SG       | 0.00 (1)          | 0.00 (1)      | 100               | 100           |

Table 53: The performance of Artetxe et al. (2017)’s model on translating words belonging to a specific morphological category for the Czech–Ukrainian language pair (the grey numbers correspond to the dictionary sizes).

| Polish–Czech         |                   |               |                   |               |
|----------------------|-------------------|---------------|-------------------|---------------|
| Morph                | Normal (In vocab) | Normal (+OOV) | Lexeme (In vocab) | Lexeme (+OOV) |
| ALL                  | 41.83 (4043)      | 34.58 (5332)  | 80.76             | 75.68         |
| DAT;N;SG             | 24.29 (280)       | 17.10 (427)   | 58.57             | 44.96         |
| N;NOM;PL             | 44.07 (388)       | 41.25 (417)   | 82.73             | 80.1          |
| GEN;N;SG             | 44.44 (414)       | 42.86 (427)   | 81.64             | 79.63         |
| ESS;N;PL             | 52.94 (255)       | 39.42 (416)   | 91.76             | 92.55         |
| N;SG;VOC             | 34.76 (187)       | 23.89 (427)   | 58.29             | 49.41         |
| N;PL;VOC             | 44.07 (388)       | 41.25 (417)   | 82.73             | 80.1          |
| ESS;N;SG             | 32.74 (336)       | 27.53 (425)   | 60.42             | 54.59         |
| DAT;N;PL             | 51.65 (182)       | 32.93 (416)   | 95.6              | 93.51         |
| GEN;N;PL             | 44.29 (368)       | 39.71 (418)   | 79.35             | 74.88         |
| ACC;N;PL             | 45.18 (394)       | 42.58 (418)   | 82.99             | 81.1          |
| INS;N;PL             | 28.57 (315)       | 23.32 (416)   | 82.54             | 81.25         |
| INS;N;SG             | 45.63 (366)       | 39.91 (426)   | 81.15             | 80.75         |
| ACC;N;SG             | 43.60 (406)       | 41.22 (427)   | 75.86             | 73.77         |
| N;NOM;SG             | 44.08 (422)       | 43.56 (427)   | 77.96             | 77.05         |
| ACC;ADJ;MASC;SG      | 47.83 (69)        | 47.83 (69)    | 98.55             | 98.55         |
| ACC;ADJ;FEM;SG       | 48.48 (66)        | 47.83 (69)    | 100               | 100           |
| ADJ;ESS;MASC;SG      | 47.54 (61)        | 47.83 (69)    | 96.72             | 97.1          |
| ADJ;INS;MASC;SG      | 46.97 (66)        | 47.83 (69)    | 96.97             | 97.1          |
| ADJ;MASC;NOM;SG      | 53.03 (66)        | 53.73 (67)    | 95.45             | 95.52         |
| ADJ;FEM;NOM;SG       | 52.31 (65)        | 53.73 (67)    | 93.85             | 94.03         |
| ADJ;NEUT;NOM;SG      | 53.73 (67)        | 53.73 (67)    | 95.52             | 94.03         |
| ADJ;DAT;MASC;SG      | 53.12 (32)        | 42.03 (69)    | 100               | 100           |
| ADJ;GEN;NEUT;SG      | 47.83 (69)        | 47.83 (69)    | 98.55             | 98.55         |
| ADJ;GEN;MASC;SG      | 47.83 (69)        | 47.83 (69)    | 98.55             | 98.55         |
| ADJ;MASC;NOM;PL      | 39.53 (43)        | 32.84 (67)    | 76.74             | 71.64         |
| ADJ;ESS;NEUT;SG      | 47.54 (61)        | 47.83 (69)    | 96.72             | 97.1          |
| ADJ;FEM;GEN;SG       | 49.25 (67)        | 50.72 (69)    | 89.55             | 89.86         |
| ADJ;ESS;FEM;SG       | 49.25 (67)        | 50.72 (69)    | 89.55             | 89.86         |
| ADJ;ESS;PL           | 40.30 (67)        | 42.03 (69)    | 100               | 100           |
| ACC;ADJ;INAN;MASC;SG | 53.03 (66)        | 53.73 (67)    | 95.45             | 95.52         |
| ACC;ADJ;MASC;PL      | 40.30 (67)        | 43.28 (67)    | 100               | 100           |
| ADJ;DAT;FEM;SG       | 49.25 (67)        | 50.72 (69)    | 89.55             | 89.86         |
| ACC;ADJ;NEUT;SG      | 52.17 (69)        | 52.17 (69)    | 94.2              | 92.75         |
| ADJ;GEN;PL           | 40.30 (67)        | 42.03 (69)    | 100               | 100           |
| ADJ;INS;PL           | 49.12 (57)        | 44.93 (69)    | 100               | 100           |
| ADJ;DAT;NEUT;SG      | 53.12 (32)        | 42.03 (69)    | 100               | 100           |
| ADJ;DAT;PL           | 46.97 (66)        | 47.83 (69)    | 96.97             | 97.1          |
| 3;MASC;PST;SG;V      | 57.58 (33)        | 52.78 (36)    | 90.91             | 91.67         |
| 3;FEM;PST;SG;V       | 56.67 (30)        | 45.95 (37)    | 93.33             | 91.89         |
| 3;PL;PRS;V           | 35.00 (20)        | 28.00 (25)    | 80                | 76            |
| 2;PRS;SG;V           | 44.44 (9)         | 24.00 (25)    | 55.56             | 56            |
| 2;IMP;SG;V           | 0.00 (18)         | 0.00 (37)     | 16.67             | 2.7           |
| 2;IMP;PL;V           | 11.11 (9)         | 8.11 (37)     | 44.44             | 29.73         |
| 3;NEUT;PST;SG;V      | 73.08 (26)        | 56.76 (37)    | 96.15             | 89.19         |
| 1;IMP;PL;V           | 0.00 (5)          | 0.00 (37)     | 0                 | 5.41          |
| 2;PL;PRS;V           | 0.00 (4)          | 8.00 (25)     | 25                | 32            |
| NFIN;V               | 52.63 (38)        | 50.00 (40)    | 94.74             | 95            |
| 3;PRS;SG;V           | 41.67 (24)        | 40.00 (25)    | 83.33             | 80            |
| 3;MASC;PL;PST;V      | 56.25 (32)        | 48.65 (37)    | 96.88             | 94.59         |
| 3;FEM;PL;PST;V       | 56.52 (23)        | 45.95 (37)    | 95.65             | 94.59         |
| 1;PL;PRS;V           | 40.00 (10)        | 16.00 (25)    | 90                | 52            |
| 1;PRS;SG;V           | 21.43 (14)        | 16.00 (25)    | 50                | 36            |
| ACC;ADJ;PL           | 0.00 (5)          | 0.00 (5)      | 60                | 60            |
| ADJ;INS;NEUT;SG      | 0.00 (5)          | 0.00 (5)      | 100               | 100           |
| ADJ;FEM;INS;SG       | 0.00 (5)          | 0.00 (5)      | 100               | 100           |
| ADJ;NOM;PL           | 0.00 (5)          | 0.00 (5)      | 60                | 60            |
| 3;FUT;SG;V           | 50.00 (10)        | 30.77 (13)    | 60                | 53.85         |
| 1;FUT;PL;V           | 50.00 (8)         | 23.08 (13)    | 62.5              | 30.77         |
| 2;FUT;SG;V           | 0.00 (3)          | 23.08 (13)    | 33.33             | 46.15         |
| 2;FUT;PL;V           | 0.00 (3)          | 7.69 (13)     | 0                 | 30.77         |
| 1;FUT;SG;V           | 12.50 (8)         | 7.69 (13)     | 75                | 46.15         |
| 3;FUT;PL;V           | 44.44 (9)         | 23.08 (13)    | 66.67             | 46.15         |

Table 54: The performance of Artetxe et al. (2017)’s model on translating words belonging to a specific morphological category for the Polish–Czech language pair (the grey numbers correspond to the dictionary sizes).

| Polish–Russian       |                   |               |                   |               |
|----------------------|-------------------|---------------|-------------------|---------------|
| Morph                | Normal (In vocab) | Normal (+OOV) | Lexeme (In vocab) | Lexeme (+OOV) |
| ALL                  | 47.14 (6814)      | 40.43 (9079)  | 83.72             | 80.54         |
| N;NOM;SG             | 41.93 (768)       | 40.84 (786)   | 76.30             | 74.17         |
| ACC;N;SG             | 42.11 (748)       | 40.20 (791)   | 75.94             | 73.45         |
| DAT;N;SG             | 36.17 (459)       | 28.23 (790)   | 76.91             | 70.76         |
| INS;N;SG             | 46.08 (688)       | 41.57 (789)   | 84.74             | 82.51         |
| ESS;N;SG             | 40.26 (611)       | 35.75 (786)   | 71.69             | 65.39         |
| GEN;N;SG             | 46.35 (753)       | 44.74 (789)   | 81.81             | 79.85         |
| ADJ;INS;PL           | 63.91 (133)       | 59.73 (149)   | 100.00            | 100           |
| ADJ;FEM;INS;SG       | 59.03 (144)       | 57.05 (149)   | 96.53             | 97.32         |
| ADJ;FEM;NOM;SG       | 56.94 (144)       | 53.69 (149)   | 90.97             | 89.26         |
| ADJ;DAT;FEM;SG       | 56.25 (144)       | 54.36 (149)   | 95.83             | 95.97         |
| ADJ;ESS;MASC;SG      | 62.32 (138)       | 59.06 (149)   | 99.28             | 98.66         |
| ADJ;INS;MASC;SG      | 60.42 (144)       | 59.06 (149)   | 99.31             | 98.66         |
| ADJ;NEUT;NOM;SG      | 62.41 (141)       | 59.06 (149)   | 94.33             | 93.29         |
| ADJ;DAT;PL           | 60.42 (144)       | 59.06 (149)   | 99.31             | 98.66         |
| ADJ;ESS;NEUT;SG      | 62.32 (138)       | 59.06 (149)   | 99.28             | 98.66         |
| ADJ;GEN;PL           | 63.45 (145)       | 61.74 (149)   | 97.93             | 97.32         |
| ADJ;DAT;NEUT;SG      | 52.56 (78)        | 48.32 (149)   | 100.00            | 99.33         |
| ACC;ADJ;FEM;SG       | 59.86 (142)       | 57.05 (149)   | 97.89             | 97.32         |
| ADJ;GEN;MASC;SG      | 61.81 (144)       | 59.73 (149)   | 97.92             | 97.32         |
| ACC;ADJ;MASC;SG      | 61.81 (144)       | 59.73 (149)   | 97.92             | 97.32         |
| ADJ;FEM;GEN;SG       | 56.25 (144)       | 54.36 (149)   | 95.83             | 95.97         |
| ACC;ADJ;INAN;MASC;SG | 57.64 (144)       | 56.38 (149)   | 89.58             | 88.59         |
| ADJ;INS;NEUT;SG      | 60.42 (144)       | 59.06 (149)   | 99.31             | 98.66         |
| ADJ;MASC;NOM;SG      | 57.64 (144)       | 56.38 (149)   | 89.58             | 88.59         |
| ADJ;NOM;PL           | 61.11 (144)       | 59.06 (149)   | 94.44             | 93.29         |
| ACC;ADJ;PL           | 60.27 (146)       | 59.06 (149)   | 93.84             | 93.29         |
| ADJ;DAT;MASC;SG      | 52.56 (78)        | 48.32 (149)   | 100.00            | 99.33         |
| ADJ;ESS;PL           | 63.45 (145)       | 61.74 (149)   | 97.93             | 97.32         |
| ACC;ADJ;NEUT;SG      | 62.41 (141)       | 59.06 (149)   | 94.33             | 93.29         |
| ADJ;GEN;NEUT;SG      | 61.81 (144)       | 59.73 (149)   | 97.92             | 97.32         |
| ADJ;ESS;FEM;SG       | 56.25 (144)       | 54.36 (149)   | 95.83             | 95.97         |
| INS;N;PL             | 51.46 (480)       | 42.60 (723)   | 97.71             | 98.48         |
| N;NOM;PL             | 44.78 (670)       | 42.72 (721)   | 80.75             | 78.92         |
| DAT;N;PL             | 52.92 (240)       | 35.68 (723)   | 88.33             | 88.8          |
| ACC;N;PL             | 47.55 (511)       | 44.72 (559)   | 83.17             | 80.86         |
| GEN;N;PL             | 46.80 (641)       | 42.72 (728)   | 78.78             | 74.59         |
| ESS;N;PL             | 55.76 (425)       | 45.23 (723)   | 94.35             | 93.78         |
| NFIN;V               | 44.44 (27)        | 40.00 (30)    | 100.00            | 100           |
| 3;FEM;PL;PST;V       | 9.52 (21)         | 12.90 (31)    | 80.95             | 87.1          |
| 2;IMP;PL;V           | 0.00 (5)          | 6.45 (31)     | 100.00            | 41.94         |
| 2;FEM;PST;SG;V       | 0.00 (1)          | 6.45 (31)     | 0.00              | 19.35         |
| 3;NEUT;PST;SG;V      | 25.00 (16)        | 29.03 (31)    | 62.50             | 87.1          |
| 3;MASC;PL;PST;V      | 28.00 (25)        | 32.26 (31)    | 88.00             | 87.1          |
| 1;FEM;PST;SG;V       | 0.00 (9)          | 0.00 (31)     | 11.11             | 3.23          |
| 3;MASC;PST;SG;V      | 36.00 (25)        | 32.26 (31)    | 92.00             | 83.87         |
| 2;MASC;PL;PST;V      | 0.00 (1)          | 12.90 (31)    | 0.00              | 41.94         |
| 2;IMP;SG;V           | 11.76 (17)        | 3.23 (31)     | 23.53             | 12.9          |
| 2;PRS;SG;V           | 20.00 (5)         | 4.76 (21)     | 20.00             | 33.33         |
| 2;PL;PRS;V           | 0.00 (3)          | 4.76 (21)     | 66.67             | 28.57         |
| 3;PL;PRS;V           | 35.29 (17)        | 28.57 (21)    | 94.12             | 95.24         |
| 3;FEM;PST;SG;V       | 30.77 (26)        | 32.26 (31)    | 88.46             | 93.55         |
| 1;PL;PRS;V           | 37.50 (8)         | 9.52 (21)     | 75.00             | 57.14         |
| 3;PRS;SG;V           | 19.05 (21)        | 19.05 (21)    | 76.19             | 76.19         |
| 1;PRS;SG;V           | 8.33 (12)         | 14.29 (21)    | 50.00             | 47.62         |
| 1;MASC;PL;PST;V      | 14.29 (7)         | 6.45 (31)     | 14.29             | 12.9          |
| 1;MASC;PST;SG;V      | 0.00 (16)         | 0.00 (31)     | 6.25              | 3.23          |
| 1;FEM;PL;PST;V       | -                 | 22.58 (31)    | -                 | 77.42         |
| 2;MASC;PST;SG;V      | 0.00 (10)         | 0.00 (31)     | 0.00              | 0             |
| 2;FEM;PL;PST;V       | -                 | 19.35 (31)    | -                 | 51.61         |
| 2;FUT;PL;V           | 0.00 (1)          | 0.00 (10)     | 0.00              | 10            |
| 1;FUT;PL;V           | 33.33 (3)         | 10.00 (10)    | 33.33             | 30            |
| 1;FUT;SG;V           | 0.00 (4)          | 0.00 (10)     | 0.00              | 10            |
| 2;FUT;SG;V           | 0.00 (1)          | 0.00 (10)     | 0.00              | 50            |
| 3;FUT;SG;V           | 0.00 (8)          | 0.00 (10)     | 75.00             | 60            |
| 3;FUT;PL;V           | 12.50 (8)         | 10.00 (10)    | 62.50             | 50            |

Table 55: The performance of Artetxe et al. (2017)’s model on translating words belonging to a specific morphological category for the Polish–Russian language pair (the grey numbers correspond to the dictionary sizes).

| Polish–Slovak        |                   |               |                   |               |
|----------------------|-------------------|---------------|-------------------|---------------|
| Morph                | Normal (In vocab) | Normal (+OOV) | Lexeme (In vocab) | Lexeme (+OOV) |
| ALL                  | 33.03 (1217)      | 26.29 (1689)  | 78.06             | 75.73         |
| INS;N;SG             | 30.89 (123)       | 24.84 (157)   | 84.55             | 82.17         |
| N;NOM;SG             | 28.57 (154)       | 28.03 (157)   | 71.43             | 69.43         |
| GEN;N;SG             | 27.78 (144)       | 26.11 (157)   | 74.31             | 72.61         |
| DAT;N;SG             | 21.98 (91)        | 13.38 (157)   | 67.03             | 58.6          |
| ACC;N;PL             | 25.74 (136)       | 23.08 (156)   | 76.47             | 73.72         |
| INS;N;PL             | 39.33 (89)        | 26.28 (156)   | 98.88             | 98.72         |
| DAT;N;PL             | 23.53 (68)        | 16.03 (156)   | 61.76             | 66.67         |
| N;NOM;PL             | 24.64 (138)       | 22.44 (156)   | 77.54             | 73.72         |
| ESS;N;SG             | 29.09 (110)       | 22.44 (156)   | 66.36             | 52.56         |
| GEN;N;PL             | 38.66 (119)       | 30.13 (156)   | 75.63             | 64.74         |
| ESS;N;PL             | 40.26 (77)        | 29.49 (156)   | 90.91             | 94.87         |
| ACC;N;SG             | 31.47 (143)       | 28.03 (157)   | 62.94             | 59.87         |
| ADJ;ESS;FEM;SG       | 47.06 (17)        | 45.00 (20)    | 88.24             | 90            |
| ADJ;ESS;MASC;SG      | 50.00 (14)        | 40.00 (20)    | 100.00            | 100           |
| ADJ;DAT;NEUT;SG      | 45.45 (11)        | 30.00 (20)    | 100.00            | 100           |
| ADJ;FEM;GEN;SG       | 47.06 (17)        | 45.00 (20)    | 88.24             | 90            |
| ADJ;DAT;PL           | 41.18 (17)        | 40.00 (20)    | 100.00            | 100           |
| ADJ;INS;PL           | 71.43 (14)        | 55.00 (20)    | 100.00            | 100           |
| ADJ;MASC;NOM;PL      | 36.36 (11)        | 30.00 (20)    | 90.91             | 90            |
| ADJ;GEN;NEUT;SG      | 55.56 (18)        | 50.00 (20)    | 94.44             | 95            |
| ADJ;ESS;NEUT;SG      | 50.00 (14)        | 40.00 (20)    | 100.00            | 100           |
| ACC;ADJ;MASC;SG      | 55.56 (18)        | 50.00 (20)    | 94.44             | 95            |
| ADJ;GEN;PL           | 57.89 (19)        | 55.00 (20)    | 100.00            | 100           |
| ADJ;FEM;INS;SG       | 53.85 (13)        | 40.00 (20)    | 100.00            | 95            |
| ADJ;INS;MASC;SG      | 41.18 (17)        | 40.00 (20)    | 100.00            | 100           |
| ADJ;INS;NEUT;SG      | 41.18 (17)        | 40.00 (20)    | 100.00            | 100           |
| ACC;ADJ;NEUT;SG      | 61.11 (18)        | 55.00 (20)    | 100.00            | 100           |
| ACC;ADJ;INAN;MASC;SG | 57.89 (19)        | 55.00 (20)    | 100.00            | 100           |
| ACC;ADJ;PL           | 61.11 (18)        | 55.00 (20)    | 100.00            | 100           |
| ACC;ADJ;MASC;PL      | 57.89 (19)        | 55.00 (20)    | 100.00            | 100           |
| ADJ;FEM;NOM;SG       | 38.89 (18)        | 35.00 (20)    | 83.33             | 80            |
| ADJ;ESS;PL           | 57.89 (19)        | 55.00 (20)    | 100.00            | 100           |
| ADJ;NOM;PL           | 61.11 (18)        | 55.00 (20)    | 100.00            | 100           |
| ADJ;GEN;MASC;SG      | 55.56 (18)        | 50.00 (20)    | 94.44             | 95            |
| ADJ;NEUT;NOM;SG      | 61.11 (18)        | 55.00 (20)    | 100.00            | 100           |
| ACC;ADJ;FEM;SG       | 46.67 (15)        | 40.00 (20)    | 86.67             | 95            |
| ADJ;MASC;NOM;SG      | 57.89 (19)        | 55.00 (20)    | 100.00            | 100           |
| ADJ;DAT;MASC;SG      | 45.45 (11)        | 30.00 (20)    | 100.00            | 100           |
| ADJ;DAT;FEM;SG       | 47.06 (17)        | 45.00 (20)    | 88.24             | 90            |
| NFIN;V               | 60.00 (10)        | 54.55 (11)    | 100.00            | 100           |
| 2;PRS;SG;V           | 0.00 (1)          | 0.00 (1)      | 100.00            | 100           |
| 1;PL;PRS;V           | 100.00 (1)        | 100.00 (1)    | 100.00            | 100           |
| 3;NEUT;PST;SG;V      | 0.00 (1)          | 0.00 (1)      | 0.00              | 0             |
| 3;MASC;PST;SG;V      | 0.00 (1)          | 0.00 (1)      | 0.00              | 0             |
| 2;IMP;SG;V           | -                 | 0.00 (1)      | -                 | 0             |
| 3;MASC;PL;PST;V      | 0.00 (1)          | 0.00 (1)      | 0.00              | 0             |
| 3;FEM;PL;PST;V       | 0.00 (1)          | 0.00 (1)      | 0.00              | 0             |
| 1;IMP;PL;V           | -                 | 0.00 (1)      | -                 | 0             |
| 3;PRS;SG;V           | 100.00 (1)        | 100.00 (1)    | 100.00            | 100           |
| 2;PL;PRS;V           | 0.00 (1)          | 0.00 (1)      | 100.00            | 100           |
| 2;IMP;PL;V           | -                 | 0.00 (1)      | -                 | 0             |
| 3;FEM;PST;SG;V       | 0.00 (1)          | 0.00 (1)      | 0.00              | 0             |
| 1;PRS;SG;V           | 0.00 (1)          | 0.00 (1)      | 100.00            | 100           |
| 3;PL;PRS;V           | 100.00 (1)        | 100.00 (1)    | 100.00            | 100           |

Table 56: The performance of [Artetxe et al. \(2017\)](#)’s model on translating words belonging to a specific morphological category for the Polish–Slovak language pair (the grey numbers correspond to the dictionary sizes).

| Polish–Ukrainian     |                   |               |                   |               |
|----------------------|-------------------|---------------|-------------------|---------------|
| Morph                | Normal (In vocab) | Normal (+OOV) | Lexeme (In vocab) | Lexeme (+OOV) |
| ALL                  | 34.79 (1118)      | 29.60 (1463)  | 74.15             | 70.54         |
| N;PL;VOC             | 34.11 (129)       | 33.08 (133)   | 77.52             | 75.94         |
| N;NOM;PL             | 34.11 (129)       | 33.08 (133)   | 77.52             | 75.94         |
| ACC;N;PL             | 34.88 (129)       | 33.83 (133)   | 76.74             | 75.19         |
| ACC;N;SG             | 37.69 (130)       | 36.03 (136)   | 68.46             | 66.18         |
| ESS;N;PL             | 40.23 (87)        | 34.59 (133)   | 88.51             | 89.47         |
| N;SG;VOC             | 18.75 (64)        | 16.18 (136)   | 62.50             | 50            |
| INS;N;PL             | 36.63 (101)       | 30.08 (133)   | 99.01             | 98.5          |
| GEN;N;SG             | 37.59 (133)       | 36.76 (136)   | 76.69             | 75.74         |
| DAT;N;PL             | 42.86 (56)        | 33.08 (133)   | 94.64             | 92.48         |
| INS;N;SG             | 42.61 (115)       | 36.76 (136)   | 78.26             | 77.21         |
| N;NOM;SG             | 37.50 (136)       | 37.23 (137)   | 67.65             | 66.42         |
| ESS;N;SG             | 27.59 (116)       | 23.53 (136)   | 61.21             | 54.41         |
| DAT;N;SG             | 23.40 (94)        | 16.18 (136)   | 52.13             | 37.5          |
| GEN;N;PL             | 40.50 (121)       | 36.84 (133)   | 79.34             | 76.69         |
| 2;MASC;PST;SG;V      | 0.00 (4)          | 0.00 (7)      | 0.00              | 0             |
| 1;FEM;PL;PST;V       | -                 | 28.57 (7)     | -                 | 42.86         |
| 1;MASC;PST;SG;V      | 0.00 (5)          | 0.00 (7)      | 20.00             | 14.29         |
| 3;FEM;PL;PST;V       | 16.67 (6)         | 14.29 (7)     | 83.33             | 85.71         |
| 2;FUT;SG;V           | 0.00 (1)          | 0.00 (1)      | 0.00              | 0             |
| 2;MASC;PL;PST;V      | 0.00 (2)          | 0.00 (7)      | 0.00              | 57.14         |
| 3;NEUT;PST;SG;V      | 60.00 (5)         | 42.86 (7)     | 100.00            | 100           |
| 1;MASC;PL;PST;V      | 0.00 (3)          | 0.00 (7)      | 33.33             | 14.29         |
| 1;FUT;PL;V           | 0.00 (1)          | 0.00 (1)      | 0.00              | 0             |
| 1;FEM;PST;SG;V       | 0.00 (4)          | 0.00 (7)      | 0.00              | 0             |
| NFIN;V               | 57.14 (7)         | 57.14 (7)     | 100.00            | 100           |
| 3;FUT;PL;V           | 100.00 (1)        | 100.00 (1)    | 100.00            | 100           |
| 2;FEM;PST;SG;V       | 0.00 (1)          | 0.00 (7)      | 0.00              | 0             |
| 3;MASC;PL;PST;V      | 66.67 (6)         | 57.14 (7)     | 83.33             | 85.71         |
| 2;IMP;SG;V           | 0.00 (7)          | 0.00 (7)      | 0.00              | 0             |
| 2;IMP;PL;V           | 0.00 (4)          | 0.00 (7)      | 50.00             | 28.57         |
| 3;MASC;PST;SG;V      | 57.14 (7)         | 57.14 (7)     | 100.00            | 100           |
| 3;FEM;PST;SG;V       | 57.14 (7)         | 57.14 (7)     | 100.00            | 100           |
| 3;FUT;SG;V           | 0.00 (1)          | 0.00 (1)      | 0.00              | 0             |
| 2;FEM;PL;PST;V       | -                 | 14.29 (7)     | -                 | 57.14         |
| 1;FUT;SG;V           | 0.00 (1)          | 0.00 (1)      | 100.00            | 100           |
| 2;FUT;PL;V           | 0.00 (1)          | 0.00 (1)      | 0.00              | 0             |
| 1;IMP;PL;V           | 0.00 (3)          | 0.00 (7)      | 0.00              | 0             |
| 1;PRS;SG;V           | 33.33 (6)         | 33.33 (6)     | 50.00             | 50            |
| 3;PL;PRS;V           | 66.67 (6)         | 66.67 (6)     | 100.00            | 100           |
| 2;PRS;SG;V           | 0.00 (4)          | 0.00 (6)      | 25.00             | 33.33         |
| 2;PL;PRS;V           | 0.00 (3)          | 16.67 (6)     | 0.00              | 33.33         |
| 1;PL;PRS;V           | 50.00 (4)         | 50.00 (6)     | 50.00             | 66.67         |
| 3;PRS;SG;V           | 50.00 (6)         | 50.00 (6)     | 100.00            | 100           |
| ACC;ADJ;MASC;SG      | 0.00 (2)          | 0.00 (2)      | 100.00            | 100           |
| ADJ;DAT;FEM;SG       | -                 | 0.00 (2)      | -                 | 100           |
| ADJ;NEUT;NOM;SG      | 50.00 (2)         | 50.00 (2)     | 100.00            | 100           |
| ACC;ADJ;PL           | 50.00 (2)         | 50.00 (2)     | 100.00            | 100           |
| ADJ;FEM;INS;SG       | 0.00 (2)          | 0.00 (2)      | 100.00            | 100           |
| ADJ;INS;MASC;SG      | 50.00 (2)         | 50.00 (2)     | 100.00            | 100           |
| ADJ;FEM;NOM;SG       | 0.00 (2)          | 0.00 (2)      | 100.00            | 100           |
| ADJ;GEN;PL           | 0.00 (2)          | 0.00 (2)      | 100.00            | 100           |
| ADJ;NOM;PL           | 50.00 (2)         | 50.00 (2)     | 100.00            | 100           |
| ADJ;DAT;NEUT;SG      | -                 | 0.00 (2)      | -                 | 100           |
| ADJ;ESS;NEUT;SG      | -                 | 50.00 (2)     | -                 | 100           |
| ADJ;MASC;NOM;SG      | 0.00 (2)          | 0.00 (2)      | 100.00            | 100           |
| ADJ;GEN;NEUT;SG      | 0.00 (2)          | 0.00 (2)      | 100.00            | 100           |
| ADJ;ESS;FEM;SG       | -                 | 0.00 (2)      | -                 | 100           |
| ADJ;ESS;PL           | 0.00 (2)          | 0.00 (2)      | 100.00            | 100           |
| ADJ;DAT;MASC;SG      | -                 | 0.00 (2)      | -                 | 100           |
| ADJ;INS;NEUT;SG      | 50.00 (2)         | 50.00 (2)     | 100.00            | 100           |
| ADJ;INS;PL           | 0.00 (1)          | 0.00 (2)      | 100.00            | 100           |
| ACC;ADJ;NEUT;SG      | 50.00 (2)         | 50.00 (2)     | 100.00            | 100           |
| ACC;ADJ;FEM;SG       | 0.00 (2)          | 0.00 (2)      | 100.00            | 100           |
| ADJ;DAT;PL           | 50.00 (2)         | 50.00 (2)     | 100.00            | 100           |
| ACC;ADJ;INAN;MASC;SG | 0.00 (2)          | 0.00 (2)      | 100.00            | 100           |
| ADJ;FEM;GEN;SG       | 0.00 (2)          | 0.00 (2)      | 100.00            | 100           |
| ADJ;ESS;MASC;SG      | -                 | 50.00 (2)     | -                 | 100           |
| ADJ;GEN;MASC;SG      | 0.00 (2)          | 0.00 (2)      | 100.00            | 100           |

Table 57: The performance of Artetxe et al. (2017)’s model on translating words belonging to a specific morphological category for the Polish–Ukrainian language pair (the grey numbers correspond to the dictionary sizes).



| Morph           | Normal (In vocab) | Catalan–French |                   |               |
|-----------------|-------------------|----------------|-------------------|---------------|
|                 |                   | Normal (+OOV)  | Lexeme (In vocab) | Lexeme (+OOV) |
| ALL             | 54.95 (5605)      | 31.42 (11367)  | 78.57             | 48.91         |
| N;SG            | 63.81 (1293)      | 62.53 (1321)   | 87.63             | 87.66         |
| N;PL            | 66.02 (1089)      | 61.83 (1221)   | 95.96             | 95.17         |
| 1;PL;PRS;SBJV;V | 10.00 (60)        | 8.22 (219)     | 16.67             | 17.35         |
| 1;COND;SG;V     | 36.63 (101)       | 28.31 (219)    | 55.45             | 52.97         |
| 1;PST;SBJV;SG;V | 3.33 (60)         | 8.68 (219)     | 6.67              | 16.89         |
| 2;PFV;PL;PST;V  | -                 | 0.46 (219)     | -                 | 0.91          |
| 2;IPFV;PL;PST;V | 0.00 (2)          | 0.46 (219)     | 0.00              | 1.37          |
| 3;COND;PL;V     | 51.35 (74)        | 31.36 (220)    | 62.16             | 51.82         |
| 2;PL;PRS;V      | 21.67 (60)        | 14.61 (219)    | 28.33             | 23.29         |
| 3;PL;PST;SBJV;V | 0.00 (64)         | 0.00 (220)     | 0.00              | 0             |
| 2;COND;PL;V     | 0.00 (1)          | 2.74 (219)     | 0.00              | 4.57          |
| NFIN;V          | 61.14 (211)       | 58.30 (223)    | 89.10             | 86.1          |
| 2;IMP;POS;SG;V  | 49.50 (202)       | 46.12 (219)    | 63.37             | 57.53         |
| 3;FUT;PL;V      | 74.67 (75)        | 48.18 (220)    | 94.67             | 89.55         |
| 2;IMP;PL;POS;V  | 21.67 (60)        | 14.61 (219)    | 30.00             | 23.29         |
| 1;FUT;SG;V      | 42.31 (26)        | 32.42 (219)    | 69.23             | 56.16         |
| 2;PL;PST;SBJV;V | 0.00 (1)          | 0.00 (219)     | 0.00              | 0.91          |
| 3;PST;SBJV;SG;V | 6.31 (111)        | 8.64 (220)     | 10.81             | 16.82         |
| 3;PFV;PST;SG;V  | 53.05 (164)       | 42.73 (220)    | 71.95             | 59.55         |
| 2;PST;SBJV;SG;V | 0.00 (3)          | 0.46 (219)     | 0.00              | 0.91          |
| 1;PRS;SBJV;SG;V | 17.76 (152)       | 17.19 (221)    | 25.00             | 23.98         |
| 1;IPFV;PL;PST;V | 0.00 (5)          | 0.91 (219)     | 0.00              | 3.65          |
| 1;COND;PL;V     | 20.00 (5)         | 2.28 (219)     | 20.00             | 5.02          |
| 3;PRS;SBJV;SG;V | 17.65 (153)       | 17.12 (222)    | 24.84             | 23.87         |
| 3;PFV;PL;PST;V  | 66.41 (131)       | 50.91 (220)    | 98.47             | 95.91         |
| 2;PRS;SBJV;SG;V | 8.33 (36)         | 4.52 (221)     | 16.67             | 9.95          |
| 3;IPFV;PL;PST;V | 67.72 (158)       | 57.27 (220)    | 95.57             | 95            |
| 1;PL;PST;SBJV;V | 0.00 (2)          | 0.00 (219)     | 0.00              | 0             |
| 3;FUT;SG;V      | 66.10 (118)       | 48.18 (220)    | 84.75             | 75.91         |
| 3;PL;PRS;SBJV;V | 26.50 (117)       | 20.72 (222)    | 39.32             | 32.43         |
| 2;PFV;PST;SG;V  | 0.00 (2)          | 5.48 (219)     | 50.00             | 10.5          |
| 1;PFV;PL;PST;V  | 0.00 (2)          | 3.20 (219)     | 0.00              | 7.31          |
| 3;IPFV;PST;SG;V | 60.92 (174)       | 55.45 (220)    | 90.23             | 86.82         |
| 2;PL;PRS;SBJV;V | 17.95 (39)        | 13.70 (219)    | 25.64             | 22.37         |
| 1;FUT;PL;V      | 28.12 (32)        | 17.81 (219)    | 37.50             | 32.42         |
| 3;PRS;SG;V      | 49.51 (204)       | 46.15 (221)    | 64.22             | 58.82         |
| 1;PRS;SG;V      | 7.14 (98)         | 7.24 (221)     | 14.29             | 12.22         |
| 2;FUT;PL;V      | 14.29 (7)         | 5.02 (219)     | 14.29             | 10.96         |
| 1;IMP;PL;POS;V  | 11.11 (72)        | 8.26 (218)     | 16.67             | 17.43         |
| 1;IPFV;PST;SG;V | 63.64 (132)       | 55.71 (219)    | 92.42             | 87.21         |
| 2;PRS;SG;V      | 30.23 (86)        | 20.00 (220)    | 45.35             | 32.73         |
| 2;FUT;SG;V      | 20.00 (5)         | 5.48 (219)     | 20.00             | 9.13          |
| 1;PFV;PST;SG;V  | 58.62 (29)        | 8.76 (217)     | 75.86             | 11.52         |
| 3;PL;PRS;V      | 62.96 (189)       | 56.56 (221)    | 91.01             | 87.33         |
| 3;COND;SG;V     | 37.29 (118)       | 28.18 (220)    | 55.08             | 53.18         |
| 2;COND;SG;V     | 0.00 (5)          | 0.00 (219)     | 20.00             | 2.28          |
| 2;IPFV;PST;SG;V | 12.50 (8)         | 0.91 (219)     | 12.50             | 1.83          |
| 1;PL;PRS;V      | 11.84 (76)        | 8.68 (219)     | 22.37             | 18.72         |
| ADJ;FEM;PL      | 68.07 (332)       | 67.76 (335)    | 98.80             | 98.81         |
| ADJ;MASC;PL     | 68.69 (329)       | 65.90 (349)    | 97.87             | 97.71         |
| ADJ;MASC;SG     | 69.27 (358)       | 68.41 (364)    | 95.81             | 95.6          |
| ADJ;FEM;SG      | 69.17 (360)       | 68.49 (365)    | 95.83             | 95.62         |

Table 58: The performance of [Artetxe et al. \(2017\)](#)’s model on translating words belonging to a specific morphological category for the Catalan–French language pair (the grey numbers correspond to the dictionary sizes).

| Morph           | Catalan–Italian   |               |                   |               |
|-----------------|-------------------|---------------|-------------------|---------------|
|                 | Normal (In vocab) | Normal (+OOV) | Lexeme (In vocab) | Lexeme (+OOV) |
| ALL             | 52.25 (5518)      | 29.00 (11970) | 80.01             | 49.53         |
| 2;FUT;SG;V      | 0.00 (10)         | 1.24 (241)    | 10.00             | 2.9           |
| 2;IPFV;PL;PST;V | 0.00 (1)          | 0.41 (241)    | 0.00              | 2.07          |
| 1;PFV;PL;PST;V  | 0.00 (1)          | 1.24 (241)    | 0.00              | 1.66          |
| 1;IPFV;PL;PST;V | 66.67 (6)         | 24.07 (241)   | 100.00            | 54.77         |
| 3;IMP;PL;POS;V  | 14.15 (106)       | 9.92 (242)    | 22.64             | 20.25         |
| 2;PL;PRS;SBJV;V | 0.00 (29)         | 0.42 (240)    | 0.00              | 0.83          |
| 2;PFV;PL;PST;V  | -                 | 1.24 (241)    | -                 | 2.9           |
| 3;IMP;POS;SG;V  | 19.86 (141)       | 14.46 (242)   | 31.21             | 23.14         |
| 3;PST;SBJV;SG;V | 44.62 (130)       | 37.76 (241)   | 76.15             | 69.71         |
| 1;IPFV;PST;SG;V | 65.00 (100)       | 55.60 (241)   | 93.00             | 86.72         |
| 1;FUT;PL;V      | 32.00 (25)        | 20.75 (241)   | 56.00             | 45.23         |
| 1;PL;PRS;V      | 20.00 (70)        | 12.50 (240)   | 54.29             | 37.5          |
| 1;FUT;SG;V      | 50.00 (22)        | 19.92 (241)   | 77.27             | 41.91         |
| 3;PRS;SG;V      | 49.32 (221)       | 48.15 (243)   | 69.23             | 65.02         |
| 2;PRS;SG;V      | 25.27 (91)        | 11.16 (242)   | 37.36             | 14.46         |
| 1;PL;PRS;SBJV;V | 15.94 (69)        | 10.42 (240)   | 50.72             | 36.25         |
| 3;IPFV;PL;PST;V | 64.60 (161)       | 56.61 (242)   | 95.03             | 95.45         |
| 3;COND;PL;V     | 1.56 (64)         | 0.83 (242)    | 3.12              | 4.55          |
| 3;COND;SG;V     | 5.31 (113)        | 2.48 (242)    | 11.50             | 14.05         |
| 2;PRS;SBJV;SG;V | 2.70 (37)         | 4.98 (241)    | 16.22             | 10.79         |
| 2;FUT;PL;V      | 0.00 (8)          | 1.24 (241)    | 25.00             | 10.79         |
| 2;IPFV;PST;SG;V | 0.00 (4)          | 3.32 (241)    | 0.00              | 3.32          |
| 3;PFV;PST;SG;V  | 47.67 (172)       | 41.32 (242)   | 68.60             | 63.64         |
| NFIN;V          | 60.34 (232)       | 58.85 (243)   | 90.95             | 91.36         |
| 3;PL;PST;SBJV;V | 50.54 (93)        | 37.34 (241)   | 98.92             | 98.76         |
| 2;IMP;POS;SG;V  | 50.70 (215)       | 48.35 (242)   | 68.84             | 64.05         |
| 3;IPFV;PST;SG;V | 61.96 (184)       | 55.37 (242)   | 90.22             | 86.78         |
| 3;PFV;PL;PST;V  | 63.57 (140)       | 55.79 (242)   | 95.00             | 95.87         |
| 1;COND;SG;V     | 6.19 (97)         | 2.49 (241)    | 8.25              | 13.69         |
| 1;PRS;SG;V      | 15.96 (94)        | 10.33 (242)   | 38.30             | 22.73         |
| 2;IMP;PL;POS;V  | 1.89 (53)         | 1.24 (241)    | 7.55              | 1.66          |
| 3;FUT;SG;V      | 57.14 (119)       | 45.04 (242)   | 89.08             | 84.3          |
| 1;IMP;PL;POS;V  | 15.94 (69)        | 10.42 (240)   | 50.72             | 36.25         |
| 2;PST;SBJV;SG;V | 0.00 (3)          | 0.83 (240)    | 33.33             | 6.67          |
| 2;PL;PRS;V      | 1.92 (52)         | 1.25 (240)    | 7.69              | 1.67          |
| 1;PST;SBJV;SG;V | 47.83 (69)        | 37.92 (240)   | 82.61             | 70            |
| 2;PL;PST;SBJV;V | -                 | 0.00 (240)    | -                 | 0             |
| 2;COND;PL;V     | 0.00 (2)          | 0.41 (241)    | 0.00              | 1.66          |
| 1;PFV;PST;SG;V  | 60.00 (25)        | 8.86 (237)    | 68.00             | 12.24         |
| 1;PRS;SBJV;SG;V | 20.00 (140)       | 14.52 (241)   | 31.43             | 23.24         |
| 3;PRS;SBJV;SG;V | 19.86 (141)       | 14.46 (242)   | 31.21             | 23.14         |
| 1;COND;PL;V     | 0.00 (5)          | 7.47 (241)    | 40.00             | 25.73         |
| 2;COND;SG;V     | 0.00 (5)          | 0.00 (241)    | 0.00              | 1.24          |
| 1;PL;PST;SBJV;V | 0.00 (4)          | 7.50 (240)    | 50.00             | 22.08         |
| 3;PL;PRS;V      | 54.23 (201)       | 47.93 (242)   | 85.07             | 80.58         |
| 3;FUT;PL;V      | 51.32 (76)        | 38.02 (242)   | 84.21             | 82.23         |
| 3;PL;PRS;SBJV;V | 14.15 (106)       | 9.92 (242)    | 22.64             | 20.25         |
| 2;PFV;PST;SG;V  | -                 | 0.00 (241)    | -                 | 1.66          |
| N;PL            | 59.56 (1083)      | 56.54 (1192)  | 90.77             | 89.85         |
| N;SG            | 64.65 (1307)      | 63.87 (1323)  | 92.96             | 92.67         |
| ADJ;FEM;SG      | 62.76 (290)       | 62.54 (291)   | 96.55             | 96.22         |
| ADJ;MASC;PL     | 64.60 (274)       | 63.83 (282)   | 94.53             | 94.68         |
| ADJ;FEM;PL      | 66.91 (269)       | 66.30 (270)   | 97.03             | 96.67         |
| ADJ;MASC;SG     | 62.54 (291)       | 62.33 (292)   | 96.56             | 96.23         |

Table 59: The performance of [Artetxe et al. \(2017\)](#)’s model on translating words belonging to a specific morphological category for the Catalan–Italian language pair (the grey numbers correspond to the dictionary sizes).

| Catalan–Portuguese |                   |               |                   |               |
|--------------------|-------------------|---------------|-------------------|---------------|
| Morph              | Normal (In vocab) | Normal (+OOV) | Lexeme (In vocab) | Lexeme (+OOV) |
| ALL                | 62.42 (5418)      | 40.64 (10759) | 82.76             | 57.37         |
| N;PL               | 68.06 (1027)      | 64.72 (1128)  | 92.60             | 92.11         |
| N;SG               | 67.49 (1209)      | 66.13 (1234)  | 90.90             | 90.68         |
| 3;PRS;SG;V         | 59.82 (224)       | 55.56 (243)   | 74.11             | 67.9          |
| 3;IPFV;PL;PST;V    | 76.47 (170)       | 66.80 (241)   | 97.06             | 97.1          |
| 1;FUT;PL;V         | 40.00 (20)        | 47.50 (240)   | 40.00             | 61.67         |
| 2;PRS;SBJV;SG;V    | 2.86 (35)         | 0.82 (243)    | 8.57              | 3.7           |
| 1;COND;PL;V        | 25.00 (8)         | 35.42 (240)   | 50.00             | 51.25         |
| 3;PRS;SBJV;SG;V    | 16.05 (162)       | 12.35 (243)   | 19.75             | 16.87         |
| 2;FUT;PL;V         | 0.00 (3)          | 0.00 (240)    | 0.00              | 0             |
| 1;PL;PRS;V         | 44.21 (95)        | 26.67 (240)   | 52.63             | 37.08         |
| 3;PFV;PL;PST;V     | 69.93 (153)       | 58.51 (241)   | 96.73             | 95.85         |
| 2;PRS;SG;V         | 43.21 (81)        | 29.63 (243)   | 49.38             | 36.63         |
| 2;IMP;POS;SG;V     | 58.30 (223)       | 54.32 (243)   | 72.65             | 66.67         |
| 3;COND;PL;V        | 68.29 (82)        | 61.41 (241)   | 82.93             | 87.55         |
| 3;IPFV;PST;SG;V    | 72.11 (190)       | 64.73 (241)   | 87.89             | 88.38         |
| 3;COND;SG;V        | 66.67 (132)       | 57.68 (241)   | 79.55             | 76.76         |
| 1;IMP;PL;POS;V     | 49.06 (53)        | 26.14 (241)   | 54.72             | 36.51         |
| 3;FUT;SG;V         | 72.36 (123)       | 61.00 (241)   | 86.18             | 87.14         |
| 2;IPFV;PST;SG;V    | 25.00 (4)         | 18.67 (241)   | 25.00             | 23.24         |
| 1;PL;PRS;SBJV;V    | 49.06 (53)        | 26.25 (240)   | 54.72             | 36.67         |
| 3;PL;PRS;SBJV;V    | 36.09 (133)       | 25.93 (243)   | 45.11             | 38.68         |
| 1;FUT;SG;V         | 36.84 (19)        | 51.45 (241)   | 42.11             | 68.88         |
| 1;IPFV;PST;SG;V    | 72.11 (190)       | 64.32 (241)   | 87.89             | 87.97         |
| 1;PFV;PST;SG;V     | 45.95 (37)        | 7.47 (241)    | 72.97             | 11.62         |
| 3;PL;PRS;V         | 65.38 (208)       | 58.85 (243)   | 88.94             | 83.95         |
| 2;PL;PRS;SBJV;V    | 0.00 (10)         | 1.25 (240)    | 10.00             | 4.17          |
| 3;IMP;PL;POS;V     | 36.09 (133)       | 25.93 (243)   | 45.11             | 38.68         |
| 1;PRS;SBJV;SG;V    | 16.05 (162)       | 12.35 (243)   | 19.75             | 16.87         |
| 3;FUT;PL;V         | 56.79 (81)        | 52.70 (241)   | 67.90             | 77.59         |
| 1;COND;SG;V        | 66.67 (132)       | 57.68 (241)   | 79.55             | 76.76         |
| 2;PFV;PL;PST;V     | -                 | 0.00 (240)    | -                 | 0             |
| 1;PFV;PL;PST;V     | 0.00 (1)          | 7.08 (240)    | 0.00              | 10.42         |
| 2;PL;PRS;V         | 2.94 (34)         | 2.08 (240)    | 5.88              | 5             |
| 2;COND;SG;V        | 66.67 (3)         | 20.33 (241)   | 66.67             | 31.12         |
| 2;FUT;SG;V         | 33.33 (6)         | 8.30 (241)    | 50.00             | 14.11         |
| 2;IMP;PL;POS;V     | 4.08 (49)         | 2.07 (242)    | 6.12              | 4.96          |
| 1;PRS;SG;V         | 31.68 (101)       | 20.58 (243)   | 51.49             | 34.57         |
| 3;IMP;POS;SG;V     | 16.05 (162)       | 12.35 (243)   | 19.75             | 16.87         |
| 3;PFV;PST;SG;V     | 62.57 (187)       | 53.11 (241)   | 80.21             | 70.54         |
| 2;PFV;PST;SG;V     | 0.00 (2)          | 0.41 (241)    | 0.00              | 0.41          |
| 1;IPFV;PL;PST;V    | 33.33 (3)         | 13.33 (240)   | 33.33             | 31.67         |
| NFIN;V             | 69.40 (232)       | 66.80 (244)   | 89.22             | 86.48         |
| 2;IPFV;PL;PST;V    | 0.00 (2)          | 1.25 (240)    | 0.00              | 2.08          |
| 2;COND;PL;V        | -                 | 2.08 (240)    | -                 | 2.08          |
| ADJ;FEM;SG         | 71.56 (327)       | 71.43 (329)   | 96.94             | 96.96         |
| ADJ;FEM;PL         | 77.26 (299)       | 75.83 (302)   | 98.33             | 98.34         |
| ADJ;MASC;PL        | 74.84 (310)       | 72.45 (323)   | 98.39             | 98.45         |
| ADJ;MASC;SG        | 71.78 (326)       | 71.08 (332)   | 96.93             | 96.99         |

Table 60: The performance of [Artetxe et al. \(2017\)](#)’s model on translating words belonging to a specific morphological category for the Catalan–Portuguese language pair (the grey numbers correspond to the dictionary sizes).

| Catalan–Spanish |                   |               |                   |               |
|-----------------|-------------------|---------------|-------------------|---------------|
| Morph           | Normal (In vocab) | Normal (+OOV) | Lexeme (In vocab) | Lexeme (+OOV) |
| ALL             | 67.22 (5879)      | 43.19 (12282) | 83.45             | 57.23         |
| ADJ;FEM;SG      | 76.02 (342)       | 75.14 (346)   | 98.25             | 98.27         |
| ADJ;FEM;PL      | 79.25 (318)       | 78.26 (322)   | 98.74             | 98.76         |
| ADJ;MASC;SG     | 75.95 (341)       | 75.07 (345)   | 98.24             | 98.26         |
| ADJ;MASC;PL     | 81.37 (322)       | 78.92 (332)   | 98.14             | 98.19         |
| 1;PL;PRS;SBJV;V | 47.44 (78)        | 28.34 (247)   | 62.82             | 44.94         |
| 1;COND;SG;V     | 85.29 (136)       | 70.56 (248)   | 96.32             | 90.32         |
| 1;PST;SBJV;SG;V | 16.55 (145)       | 14.17 (247)   | 24.83             | 29.15         |
| 1;PL;PST;SBJV;V | 0.00 (4)          | 1.62 (247)    | 0.00              | 6.07          |
| 1;PL;PRS;V      | 51.69 (89)        | 31.71 (246)   | 66.29             | 48.37         |
| 3;IPFV;PL;PST;V | 81.71 (175)       | 70.45 (247)   | 98.29             | 96.76         |
| 2;PFV;PL;PST;V  | -                 | 0.40 (248)    | -                 | 1.21          |
| 3;PST;SBJV;SG;V | 16.55 (145)       | 14.17 (247)   | 24.83             | 29.15         |
| 2;IMP;PL;POS;V  | 3.33 (60)         | 4.45 (247)    | 5.00              | 8.5           |
| 3;COND;PL;V     | 82.22 (90)        | 72.18 (248)   | 98.89             | 97.18         |
| 3;FUT;SG;V      | 36.36 (11)        | 31.05 (248)   | 45.45             | 39.11         |
| 3;IMP;PL;POS;V  | 43.85 (130)       | 28.34 (247)   | 55.38             | 38.06         |
| 3;PL;PRS;V      | 72.06 (204)       | 61.79 (246)   | 90.69             | 81.71         |
| 1;PRS;SG;V      | 18.87 (106)       | 18.62 (247)   | 33.96             | 29.55         |
| 1;IPFV;PL;PST;V | 20.00 (5)         | 15.79 (247)   | 60.00             | 34.41         |
| 2;PST;SBJV;SG;V | 0.00 (2)          | 5.67 (247)    | 50.00             | 5.67          |
| 1;PRS;SBJV;SG;V | 32.10 (162)       | 21.86 (247)   | 40.74             | 28.74         |
| 1;IPFV;PST;SG;V | 77.49 (191)       | 68.83 (247)   | 93.19             | 90.69         |
| 3;PRS;SBJV;SG;V | 32.10 (162)       | 21.86 (247)   | 40.74             | 28.74         |
| NFIN;V          | 67.66 (235)       | 65.32 (248)   | 87.23             | 86.69         |
| 1;IMP;PL;POS;V  | 47.44 (78)        | 28.34 (247)   | 62.82             | 44.94         |
| 1;FUT;PL;V      | 75.00 (40)        | 62.90 (248)   | 90.00             | 81.45         |
| 2;COND;PL;V     | 0.00 (1)          | 10.89 (248)   | 0.00              | 16.53         |
| 2;IMP;POS;SG;V  | 67.11 (228)       | 63.71 (248)   | 75.88             | 71.37         |
| 3;COND;SG;V     | 85.29 (136)       | 70.56 (248)   | 96.32             | 90.32         |
| 1;PFV;PST;SG;V  | 61.29 (31)        | 11.79 (246)   | 77.42             | 15.85         |
| 2;IPFV;PST;SG;V | 0.00 (4)          | 10.93 (247)   | 25.00             | 12.55         |
| 3;PL;PST;SBJV;V | 7.41 (108)        | 7.29 (247)    | 10.19             | 24.29         |
| 3;PFV;PST;SG;V  | 59.89 (182)       | 48.79 (248)   | 75.82             | 67.74         |
| 2;IPFV;PL;PST;V | -                 | 0.81 (247)    | -                 | 2.02          |
| 2;PL;PST;SBJV;V | -                 | 0.00 (247)    | -                 | 0             |
| 3;IPFV;PST;SG;V | 77.49 (191)       | 68.83 (247)   | 93.19             | 90.69         |
| 3;PFV;PL;PST;V  | 78.67 (150)       | 67.34 (248)   | 98.00             | 96.37         |
| 2;FUT;PL;V      | 0.00 (5)          | 17.34 (248)   | 0.00              | 27.82         |
| 1;PFV;PL;PST;V  | 0.00 (1)          | 10.08 (248)   | 0.00              | 13.71         |
| 2;PFV;PST;SG;V  | -                 | 0.00 (248)    | -                 | 0             |
| 1;COND;PL;V     | 66.67 (6)         | 60.89 (248)   | 83.33             | 80.24         |
| 3;PL;PRS;SBJV;V | 43.85 (130)       | 28.34 (247)   | 55.38             | 38.06         |
| 3;PRS;SG;V      | 67.83 (230)       | 64.52 (248)   | 77.39             | 72.98         |
| 2;PL;PRS;V      | 2.17 (46)         | 4.47 (246)    | 4.35              | 8.54          |
| 3;FUT;PL;V      | 79.35 (92)        | 67.34 (248)   | 94.57             | 91.94         |
| 3;IMP;POS;SG;V  | 32.10 (162)       | 21.86 (247)   | 40.74             | 28.74         |
| 3;FUT;SG;V      | 83.97 (131)       | 75.00 (248)   | 96.95             | 95.56         |
| 1;FUT;SG;V      | 70.00 (30)        | 59.68 (248)   | 80.00             | 75            |
| 2;PL;PRS;SBJV;V | 0.00 (39)         | 5.26 (247)    | 2.56              | 8.91          |
| 2;COND;SG;V     | 0.00 (2)          | 16.13 (248)   | 50.00             | 23.79         |
| 2;PRS;SG;V      | 43.18 (88)        | 31.17 (247)   | 55.68             | 41.3          |
| 2;PRS;SBJV;SG;V | 8.70 (46)         | 2.43 (247)    | 17.39             | 3.64          |
| N;SG            | 77.25 (1266)      | 76.53 (1278)  | 94.31             | 94.21         |
| N;PL            | 74.51 (1079)      | 72.60 (1175)  | 93.51             | 93.28         |

Table 61: The performance of [Artetxe et al. \(2017\)](#)’s model on translating words belonging to a specific morphological category for the Catalan–Spanish language pair (the grey numbers correspond to the dictionary sizes).

| Morph           | French–Catalan    |               |                   |               |
|-----------------|-------------------|---------------|-------------------|---------------|
|                 | Normal (In vocab) | Normal (+OOV) | Lexeme (In vocab) | Lexeme (+OOV) |
| ALL             | 39.68 (7845)      | 22.56 (16992) | 75.22             | 47.37         |
| N;SG            | 50.09 (1643)      | 48.99 (1682)  | 85.82             | 85.37         |
| N;PL            | 47.99 (1440)      | 46.20 (1593)  | 90.90             | 90.02         |
| ADJ;FEM;PL      | 55.73 (393)       | 54.59 (403)   | 97.71             | 97.77         |
| ADJ;FEM;SG      | 28.37 (416)       | 27.70 (426)   | 77.16             | 76.29         |
| ADJ;MASC;PL     | 56.58 (403)       | 54.21 (428)   | 97.27             | 96.96         |
| ADJ;MASC;SG     | 45.56 (417)       | 44.24 (434)   | 89.45             | 88.25         |
| 1;PL;PRS;SBJV;V | 13.64 (44)        | 3.69 (379)    | 25.00             | 11.87         |
| 3;PRS;SG;V      | 35.36 (362)       | 34.64 (384)   | 51.38             | 50.26         |
| 3;PST;SBJV;SG;V | 15.66 (83)        | 8.66 (381)    | 33.73             | 19.69         |
| 1;PST;SBJV;SG;V | 9.09 (22)         | 0.79 (380)    | 13.64             | 1.84          |
| 1;PL;PRS;V      | 14.39 (139)       | 8.16 (380)    | 36.69             | 17.89         |
| 2;PRS;SBJV;SG;V | 24.30 (107)       | 14.74 (380)   | 35.51             | 22.11         |
| 2;FUT;SG;V      | 4.35 (23)         | 4.97 (382)    | 13.04             | 9.69          |
| 3;IPFV;PL;PST;V | 45.88 (255)       | 38.58 (381)   | 94.51             | 94.75         |
| 1;PFV;PST;SG;V  | 0.00 (47)         | 2.88 (382)    | 4.26              | 5.5           |
| 3;PFV;PST;SG;V  | 29.86 (288)       | 24.80 (383)   | 44.79             | 36.55         |
| 2;COND;PL;V     | 0.00 (5)          | 10.79 (380)   | 0.00              | 39.21         |
| NFIN;V          | 45.68 (370)       | 45.05 (384)   | 90.81             | 86.46         |
| 2;PFV;PL;PST;V  | -                 | 0.00 (380)    | -                 | 0.26          |
| 3;PFV;PL;PST;V  | 42.49 (233)       | 32.28 (381)   | 93.56             | 94.75         |
| 1;PRS;SBJV;SG;V | 32.37 (312)       | 31.58 (380)   | 48.08             | 47.37         |
| 1;IMP;PL;POS;V  | 14.71 (136)       | 8.16 (380)    | 37.50             | 17.89         |
| 3;COND;PL;V     | 42.74 (117)       | 26.25 (381)   | 75.21             | 71.13         |
| 2;IPFV;PST;SG;V | 16.67 (30)        | 6.02 (382)    | 26.67             | 9.42          |
| 1;PFV;PL;PST;V  | 0.00 (2)          | 1.32 (380)    | 0.00              | 4.74          |
| 3;COND;SG;V     | 27.81 (187)       | 19.58 (383)   | 45.99             | 34.46         |
| 2;PRS;SG;V      | 24.32 (185)       | 16.19 (383)   | 37.30             | 26.37         |
| 1;FUT;PL;V      | 21.74 (46)        | 17.37 (380)   | 34.78             | 40.79         |
| 1;COND;PL;V     | 20.00 (5)         | 21.58 (380)   | 80.00             | 59.47         |
| 2;PST;SBJV;SG;V | 0.00 (3)          | 0.26 (380)    | 33.33             | 1.05          |
| 3;FUT;PL;V      | 39.49 (157)       | 31.23 (381)   | 71.34             | 77.17         |
| 2;PL;PRS;V      | 9.63 (135)        | 9.47 (380)    | 31.85             | 20.79         |
| 2;PL;PST;SBJV;V | 0.00 (1)          | 0.00 (379)    | 100.00            | 3.43          |
| 2;IMP;PL;POS;V  | 9.63 (135)        | 9.47 (380)    | 31.85             | 20.79         |
| 1;IPFV;PST;SG;V | 7.87 (89)         | 6.02 (382)    | 16.85             | 9.42          |
| 2;PL;PRS;SBJV;V | 13.89 (36)        | 6.07 (379)    | 41.67             | 19            |
| 1;FUT;SG;V      | 21.43 (70)        | 19.90 (382)   | 48.57             | 49.48         |
| 3;PL;PRS;SBJV;V | 40.38 (265)       | 36.05 (380)   | 83.40             | 75.26         |
| 3;PL;PST;SBJV;V | 28.57 (28)        | 2.89 (380)    | 53.57             | 10.53         |
| 3;IPFV;PST;SG;V | 43.84 (292)       | 38.38 (383)   | 80.48             | 77.02         |
| 2;PFV;PST;SG;V  | -                 | 2.36 (382)    | -                 | 14.66         |
| 2;IPFV;PL;PST;V | 0.00 (3)          | 6.05 (380)    | 33.33             | 18.95         |
| 2;IMP;POS;SG;V  | 31.46 (356)       | 30.89 (382)   | 48.03             | 47.91         |
| 1;COND;SG;V     | 0.00 (67)         | 0.26 (382)    | 4.48              | 0.52          |
| 3;PRS;SBJV;SG;V | 32.27 (313)       | 31.50 (381)   | 48.24             | 47.51         |
| 3;PL;PRS;V      | 38.91 (329)       | 36.22 (381)   | 81.76             | 75.85         |
| 2;COND;SG;V     | 0.00 (17)         | 0.26 (382)    | 0.00              | 0.52          |
| 1;PRS;SG;V      | 30.65 (261)       | 30.81 (383)   | 47.89             | 48.04         |
| 1;PL;PST;SBJV;V | 0.00 (1)          | 0.26 (379)    | 0.00              | 1.06          |
| 1;IPFV;PL;PST;V | 5.26 (19)         | 3.95 (380)    | 15.79             | 11.84         |
| 3;FUT;SG;V      | 48.25 (228)       | 39.43 (383)   | 82.02             | 83.29         |
| 2;FUT;PL;V      | 4.76 (21)         | 3.95 (380)    | 4.76              | 7.89          |

Table 62: The performance of [Artetxe et al. \(2017\)](#)’s model on translating words belonging to a specific morphological category for the French–Catalan language pair (the grey numbers correspond to the dictionary sizes).

| Morph           | Normal (In vocab) | French–Italian |                   |               |
|-----------------|-------------------|----------------|-------------------|---------------|
|                 |                   | Normal (+OOV)  | Lexeme (In vocab) | Lexeme (+OOV) |
| ALL             | 48.02 (9891)      | 26.83 (22052)  | 80.00             | 51.09         |
| N;PL            | 50.80 (1943)      | 46.69 (2281)   | 86.88             | 84            |
| N;SG            | 57.29 (2388)      | 55.48 (2491)   | 89.91             | 89.28         |
| 1;PFV;PL;PST;V  | 33.33 (3)         | 0.21 (477)     | 33.33             | 1.89          |
| 1;IMP;PL;POS;V  | 30.06 (163)       | 13.90 (482)    | 60.12             | 37.14         |
| 2;PL;PRS;V      | 2.55 (196)        | 1.04 (481)     | 5.10              | 2.49          |
| 3;PRS;SBJV;SG;V | 45.09 (397)       | 41.94 (484)    | 62.97             | 56.4          |
| 1;PST;SBJV;SG;V | 45.45 (11)        | 3.14 (477)     | 45.45             | 5.03          |
| 1;PL;PST;SBJV;V | 66.67 (3)         | 0.42 (476)     | 100.00            | 3.78          |
| 2;COND;PL;V     | 0.00 (4)          | 0.21 (480)     | 0.00              | 1.04          |
| NFIN;V          | 51.95 (462)       | 50.10 (485)    | 94.37             | 91.75         |
| 3;IPFV;PST;SG;V | 50.91 (330)       | 44.74 (485)    | 84.55             | 76.08         |
| 2;PRS;SG;V      | 22.27 (256)       | 13.69 (482)    | 37.50             | 21.16         |
| 2;PFV;PST;SG;V  | 15.00 (20)        | 1.67 (478)     | 20.00             | 5.02          |
| 1;FUT;PL;V      | 31.71 (41)        | 18.75 (480)    | 53.66             | 46.67         |
| 2;PST;SBJV;SG;V | -                 | 0.21 (477)     | -                 | 1.68          |
| 2;FUT;PL;V      | 13.04 (23)        | 2.50 (480)     | 17.39             | 8.33          |
| 2;COND;SG;V     | 29.73 (37)        | 19.13 (481)    | 59.46             | 62.37         |
| 3;FUT;SG;V      | 46.24 (266)       | 38.64 (484)    | 85.34             | 79.96         |
| 2;IPFV;PL;PST;V | 0.00 (15)         | 0.00 (481)     | 0.00              | 0.42          |
| 1;IPFV;PL;PST;V | 13.04 (23)        | 5.82 (481)     | 26.09             | 21.62         |
| 3;PFV;PST;SG;V  | 38.29 (363)       | 30.98 (481)    | 61.98             | 51.35         |
| 2;IMP;POS;SG;V  | 44.19 (430)       | 40.46 (482)    | 62.56             | 56.22         |
| 1;COND;PL;V     | 0.00 (5)          | 9.79 (480)     | 20.00             | 37.5          |
| 3;PL;PRS;V      | 46.91 (405)       | 41.91 (482)    | 78.77             | 68.88         |
| 1;COND;SG;V     | 23.94 (71)        | 19.13 (481)    | 63.38             | 62.58         |
| 2;IPFV;PST;SG;V | 20.00 (45)        | 19.92 (482)    | 28.89             | 35.68         |
| 3;COND;PL;V     | 27.19 (114)       | 25.16 (481)    | 50.88             | 74.01         |
| 1;PRS;SBJV;SG;V | 45.06 (395)       | 41.79 (481)    | 63.04             | 56.34         |
| 3;IPFV;PL;PST;V | 52.55 (274)       | 44.61 (482)    | 95.62             | 95.44         |
| 2;PFV;PL;PST;V  | -                 | 0.42 (477)     | -                 | 0.84          |
| 1;PRS;SG;V      | 43.54 (379)       | 40.87 (482)    | 62.01             | 56.64         |
| 3;COND;SG;V     | 27.03 (185)       | 23.14 (484)    | 54.59             | 69.21         |
| 1;IPFV;PST;SG;V | 17.81 (73)        | 19.92 (482)    | 31.51             | 35.68         |
| 2;PL;PST;SBJV;V | 0.00 (1)          | 0.00 (476)     | 0.00              | 0.21          |
| 2;PL;PRS;SBJV;V | 0.00 (29)         | 0.00 (480)     | 0.00              | 0.42          |
| 1;FUT;SG;V      | 18.89 (90)        | 16.22 (481)    | 42.22             | 39.5          |
| 2;FUT;SG;V      | 0.00 (23)         | 2.29 (481)     | 21.74             | 11.23         |
| 3;PST;SBJV;SG;V | 21.74 (69)        | 17.08 (480)    | 43.48             | 32.71         |
| 1;PFV;PST;SG;V  | 13.95 (43)        | 16.11 (478)    | 25.58             | 22.59         |
| 3;PFV;PL;PST;V  | 48.09 (262)       | 37.03 (478)    | 97.33             | 97.91         |
| 3;PRS;SG;V      | 47.35 (452)       | 44.54 (485)    | 65.27             | 60.62         |
| 2;IMP;PL;POS;V  | 2.55 (196)        | 1.04 (482)     | 5.10              | 2.7           |
| 3;PL;PST;SBJV;V | 55.00 (20)        | 4.40 (477)     | 65.00             | 9.64          |
| 1;PL;PRS;V      | 30.06 (163)       | 13.93 (481)    | 60.12             | 37.21         |
| 1;PL;PRS;SBJV;V | 12.50 (40)        | 5.83 (480)     | 30.00             | 21.88         |
| 3;FUT;PL;V      | 49.42 (172)       | 37.01 (481)    | 95.93             | 97.92         |
| 2;PRS;SBJV;SG;V | 23.74 (219)       | 12.47 (481)    | 37.44             | 18.5          |
| 3;PL;PRS;SBJV;V | 47.90 (309)       | 41.79 (481)    | 78.64             | 68.81         |
| ADJ;MASC;PL     | 66.27 (501)       | 64.44 (523)    | 94.61             | 94.65         |
| ADJ;MASC;SG     | 64.40 (514)       | 63.00 (527)    | 95.33             | 94.88         |
| ADJ;FEM;SG      | 63.28 (512)       | 62.36 (518)    | 93.75             | 93.44         |
| ADJ;FEM;PL      | 62.12 (491)       | 61.72 (499)    | 95.93             | 95.79         |

Table 63: The performance of [Artetxe et al. \(2017\)](#)’s model on translating words belonging to a specific morphological category for the French–Italian language pair (the grey numbers correspond to the dictionary sizes).



| Morph           | French–Portuguese |               |                   |               |
|-----------------|-------------------|---------------|-------------------|---------------|
|                 | Normal (In vocab) | Normal (+OOV) | Lexeme (In vocab) | Lexeme (+OOV) |
| ALL             | 47.04 (8930)      | 29.48 (17536) | 76.84             | 53.18         |
| ADJ;MASC;SG     | 61.21 (495)       | 59.76 (507)   | 93.33             | 93.1          |
| ADJ;FEM;PL      | 62.55 (470)       | 61.25 (480)   | 98.72             | 98.33         |
| ADJ;FEM;SG      | 62.60 (492)       | 62.10 (496)   | 94.31             | 93.95         |
| ADJ;MASC;PL     | 63.81 (478)       | 60.68 (501)   | 97.28             | 97.01         |
| N;SG            | 51.88 (2151)      | 50.50 (2222)  | 86.15             | 85.28         |
| N;PL            | 52.07 (1786)      | 49.19 (2039)  | 89.14             | 87.94         |
| 3;FUT;PL;V      | 41.67 (132)       | 34.02 (438)   | 63.64             | 77.4          |
| 3;IPFV;PST;SG;V | 50.81 (309)       | 42.95 (440)   | 81.88             | 77.5          |
| NFIN;V          | 57.58 (422)       | 54.65 (441)   | 91.94             | 87.76         |
| 2;PRS;SBJV;SG;V | 28.06 (139)       | 24.31 (436)   | 41.73             | 36.7          |
| 2;IMP;PL;POS;V  | 0.76 (132)        | 0.92 (436)    | 0.76              | 1.15          |
| 2;FUT;SG;V      | 0.00 (19)         | 12.13 (437)   | 5.26              | 23.57         |
| 2;PL;PRS;SBJV;V | 0.00 (12)         | 0.23 (436)    | 0.00              | 0.69          |
| 1;PL;PRS;V      | 37.41 (139)       | 20.37 (437)   | 63.31             | 37.53         |
| 3;PFV;PST;SG;V  | 36.12 (335)       | 28.90 (436)   | 49.25             | 41.28         |
| 2;PFV;PST;SG;V  | 8.70 (23)         | 0.92 (434)    | 17.39             | 1.84          |
| 2;FUT;PL;V      | 0.00 (13)         | 0.00 (437)    | 0.00              | 0             |
| 2;COND;SG;V     | 3.12 (32)         | 0.46 (437)    | 3.12              | 1.14          |
| 3;PL;PRS;SBJV;V | 51.34 (298)       | 43.02 (437)   | 77.18             | 69.57         |
| 1;IPFV;PL;PST;V | 11.11 (27)        | 4.81 (437)    | 25.93             | 13.27         |
| 3;PRS;SG;V      | 38.61 (417)       | 37.05 (440)   | 53.24             | 50.91         |
| 2;PL;PRS;V      | 1.27 (79)         | 0.92 (437)    | 1.27              | 1.14          |
| 1;PFV;PL;PST;V  | 33.33 (6)         | 3.46 (434)    | 66.67             | 14.06         |
| 1;IPFV;PST;SG;V | 7.69 (91)         | 7.32 (437)    | 13.19             | 11.9          |
| 1;PL;PRS;SBJV;V | 15.62 (32)        | 4.82 (436)    | 28.12             | 13.3          |
| 1;PRS;SBJV;SG;V | 35.56 (374)       | 32.57 (436)   | 49.73             | 46.56         |
| 1;COND;PL;V     | 20.00 (5)         | 16.93 (437)   | 20.00             | 39.13         |
| 3;COND;PL;V     | 44.64 (112)       | 26.26 (438)   | 72.32             | 63.47         |
| 3;PFV;PL;PST;V  | 51.01 (247)       | 35.02 (434)   | 84.21             | 77.65         |
| 2;PRS;SG;V      | 29.50 (200)       | 26.32 (437)   | 44.00             | 39.59         |
| 3;FUT;SG;V      | 38.92 (203)       | 35.91 (440)   | 58.62             | 66.14         |
| 1;FUT;PL;V      | 36.11 (36)        | 27.92 (437)   | 38.89             | 53.09         |
| 3;COND;SG;V     | 29.69 (192)       | 18.86 (440)   | 40.10             | 27.05         |
| 1;IMP;PL;POS;V  | 41.30 (92)        | 20.41 (436)   | 60.87             | 37.61         |
| 2;PFV;PL;PST;V  | 0.00 (2)          | 0.00 (434)    | 0.00              | 1.38          |
| 2;IMP;POS;SG;V  | 36.10 (410)       | 34.63 (436)   | 51.71             | 48.62         |
| 3;PL;PRS;V      | 48.90 (362)       | 42.92 (438)   | 76.80             | 69.63         |
| 1;PRS;SG;V      | 36.16 (354)       | 34.55 (437)   | 51.41             | 48.51         |
| 3;PRS;SBJV;SG;V | 35.81 (377)       | 32.80 (439)   | 49.87             | 46.7          |
| 2;IPFV;PST;SG;V | 5.88 (34)         | 7.32 (437)    | 8.82              | 11.9          |
| 1;COND;SG;V     | 1.33 (75)         | 0.46 (437)    | 4.00              | 1.14          |
| 1;FUT;SG;V      | 43.66 (71)        | 37.30 (437)   | 73.24             | 80.78         |
| 2;IPFV;PL;PST;V | 0.00 (26)         | 0.23 (437)    | 0.00              | 0.69          |
| 3;IPFV;PL;PST;V | 54.65 (269)       | 43.61 (438)   | 94.80             | 95.89         |
| 1;PFV;PST;SG;V  | 5.66 (53)         | 2.76 (434)    | 15.09             | 6.68          |
| 2;COND;PL;V     | -                 | 0.00 (437)    | -                 | 0             |

Table 64: The performance of [Artetxe et al. \(2017\)](#)’s model on translating words belonging to a specific morphological category for the French–Portuguese language pair (the grey numbers correspond to the dictionary sizes).

| Morph           | French–Spanish    |               |                   |               |
|-----------------|-------------------|---------------|-------------------|---------------|
|                 | Normal (In vocab) | Normal (+OOV) | Lexeme (In vocab) | Lexeme (+OOV) |
| ALL             | 48.40 (9770)      | 27.15 (21087) | 79.30             | 49.31         |
| N;PL            | 53.92 (1873)      | 50.37 (2154)  | 88.41             | 87.51         |
| N;SG            | 55.62 (2242)      | 54.13 (2311)  | 88.63             | 88.1          |
| 1;PFV;PST;SG;V  | 5.26 (57)         | 1.76 (455)    | 7.02              | 4.4           |
| 2;COND;SG;V     | 9.30 (43)         | 0.66 (455)    | 13.95             | 1.32          |
| 3;FUT;PL;V      | 50.29 (173)       | 38.38 (456)   | 85.55             | 86.62         |
| 1;PRS;SBJV;SG;V | 39.64 (386)       | 36.26 (455)   | 51.30             | 47.03         |
| 2;COND;PL;V     | 0.00 (2)          | 3.96 (455)    | 0.00              | 7.91          |
| 2;PL;PRS;SBJV;V | 0.00 (34)         | 0.00 (455)    | 2.94              | 1.76          |
| 1;FUT;PL;V      | 42.86 (42)        | 25.93 (455)   | 66.67             | 56.04         |
| 2;PRS;SG;V      | 35.27 (224)       | 24.84 (455)   | 47.77             | 40.44         |
| 3;COND;SG;V     | 46.67 (210)       | 35.01 (457)   | 76.19             | 63.89         |
| 2;IMP;PL;POS;V  | 1.54 (130)        | 1.54 (455)    | 1.54              | 2.42          |
| 1;COND;PL;V     | 0.00 (12)         | 6.37 (455)    | 16.67             | 24.62         |
| 3;PRS;SBJV;SG;V | 39.69 (388)       | 36.32 (457)   | 51.29             | 47.05         |
| 3;IPFV;PL;PST;V | 56.46 (271)       | 44.52 (456)   | 98.15             | 96.93         |
| 1;FUT;SG;V      | 48.28 (87)        | 32.31 (455)   | 70.11             | 62.2          |
| 2;PL;PST;SBJV;V | -                 | 0.00 (455)    | -                 | 0.22          |
| 2;PL;PRS;V      | 0.00 (91)         | 1.54 (455)    | 0.00              | 2.42          |
| 2;FUT;SG;V      | 9.38 (32)         | 4.62 (455)    | 12.50             | 9.89          |
| 3;PL;PRS;V      | 46.51 (387)       | 42.11 (456)   | 73.39             | 69.3          |
| 1;PL;PST;SBJV;V | -                 | 0.44 (455)    | -                 | 1.54          |
| 2;IPFV;PST;SG;V | 18.00 (50)        | 10.99 (455)   | 20.00             | 14.07         |
| 2;FUT;PL;V      | 6.67 (15)         | 6.81 (455)    | 6.67              | 14.95         |
| NFIN;V          | 50.11 (437)       | 48.58 (457)   | 91.30             | 87.75         |
| 3;PL;PST;SBJV;V | 34.62 (26)        | 2.85 (456)    | 57.69             | 6.58          |
| 2;PFV;PST;SG;V  | 11.11 (45)        | 1.32 (455)    | 11.11             | 2.64          |
| 3;FUT;SG;V      | 50.57 (263)       | 40.92 (457)   | 77.57             | 74.84         |
| 3;IPFV;PST;SG;V | 55.99 (334)       | 47.05 (457)   | 89.22             | 83.15         |
| 2;PFV;PL;PST;V  | 0.00 (1)          | 0.00 (455)    | 0.00              | 0             |
| 2;PRS;SBJV;SG;V | 36.07 (183)       | 23.30 (455)   | 52.46             | 37.8          |
| 1;PL;PRS;V      | 30.13 (156)       | 16.92 (455)   | 58.97             | 34.73         |
| 1;PL;PRS;SBJV;V | 23.08 (39)        | 3.74 (455)    | 25.64             | 9.45          |
| 3;PST;SBJV;SG;V | 4.76 (63)         | 7.66 (457)    | 11.11             | 16.41         |
| 1;IPFV;PST;SG;V | 11.49 (87)        | 10.99 (455)   | 18.39             | 14.07         |
| 2;IMP;POS;SG;V  | 39.34 (427)       | 36.70 (455)   | 50.35             | 47.47         |
| 1;IPFV;PL;PST;V | 24.14 (29)        | 3.74 (455)    | 24.14             | 9.45          |
| 2;IPFV;PL;PST;V | 0.00 (7)          | 0.00 (455)    | 14.29             | 1.76          |
| 1;IMP;PL;POS;V  | 31.65 (139)       | 16.92 (455)   | 58.99             | 34.73         |
| 1;PST;SBJV;SG;V | 10.00 (20)        | 2.42 (455)    | 15.00             | 5.27          |
| 3;PFV;PL;PST;V  | 47.60 (250)       | 37.50 (456)   | 92.00             | 90.13         |
| 3;PFV;PST;SG;V  | 34.08 (358)       | 28.88 (457)   | 48.88             | 42.01         |
| 2;PST;SBJV;SG;V | 0.00 (3)          | 3.96 (455)    | 0.00              | 6.37          |
| 1;COND;SG;V     | 5.06 (79)         | 0.66 (455)    | 10.13             | 1.32          |
| 1;PFV;PL;PST;V  | 40.00 (5)         | 1.32 (455)    | 40.00             | 3.08          |
| 3;COND;PL;V     | 50.86 (116)       | 32.24 (456)   | 93.10             | 85.53         |
| 1;PRS;SG;V      | 39.65 (401)       | 36.70 (455)   | 51.12             | 47.47         |
| 3;PL;PRS;SBJV;V | 48.46 (357)       | 41.89 (456)   | 75.07             | 69.08         |
| 3;PRS;SG;V      | 42.30 (435)       | 40.48 (457)   | 54.02             | 50.77         |
| ADJ;FEM;SG      | 58.82 (578)       | 58.22 (584)   | 92.04             | 91.95         |
| ADJ;MASC;PL     | 61.70 (564)       | 59.25 (589)   | 96.63             | 96.6          |
| ADJ;MASC;SG     | 62.56 (577)       | 60.88 (593)   | 93.76             | 93.42         |
| ADJ;FEM;PL      | 61.65 (558)       | 60.32 (567)   | 97.67             | 97.71         |

Table 65: The performance of [Artetxe et al. \(2017\)](#)’s model on translating words belonging to a specific morphological category for the French–Spanish language pair (the grey numbers correspond to the dictionary sizes).

| Morph           | Italian–Catalan   |               |                   |               |
|-----------------|-------------------|---------------|-------------------|---------------|
|                 | Normal (In vocab) | Normal (+OOV) | Lexeme (In vocab) | Lexeme (+OOV) |
| ALL             | 35.20 (9035)      | 17.79 (22636) | 73.15             | 45.1          |
| N;SG            | 43.29 (2153)      | 41.35 (2278)  | 82.68             | 81.65         |
| N;PL            | 41.98 (1665)      | 37.72 (1983)  | 88.11             | 86.28         |
| 2;FUT;SG;V      | 5.56 (18)         | 2.33 (473)    | 5.56              | 7.82          |
| 1;COND;PL;V     | 44.44 (9)         | 20.08 (473)   | 88.89             | 75.69         |
| 3;PFV;PST;SG;V  | 25.38 (327)       | 19.45 (473)   | 44.34             | 35.94         |
| 3;IMP;PL;POS;V  | 20.25 (158)       | 9.96 (472)    | 28.48             | 18.64         |
| 1;PRS;SBJV;SG;V | 27.14 (269)       | 18.82 (473)   | 43.49             | 30.87         |
| 2;FUT;PL;V      | 0.00 (13)         | 1.90 (473)    | 0.00              | 4.44          |
| 1;IPFV;PL;PST;V | 11.11 (9)         | 4.22 (474)    | 33.33             | 27            |
| 3;PRS;SBJV;SG;V | 27.14 (269)       | 18.82 (473)   | 43.49             | 30.87         |
| 1;PL;PST;SBJV;V | 0.00 (7)          | 3.81 (473)    | 0.00              | 17.76         |
| 2;PL;PST;SBJV;V | 0.00 (1)          | 0.00 (473)    | 0.00              | 2.54          |
| 1;PRS;SG;V      | 22.69 (216)       | 14.80 (473)   | 40.74             | 23.26         |
| 1;PL;PRS;SBJV;V | 22.43 (107)       | 4.66 (472)    | 45.79             | 12.5          |
| 2;PFV;PST;SG;V  | -                 | 0.63 (473)    | -                 | 1.9           |
| 2;COND;SG;V     | 0.00 (5)          | 0.00 (473)    | 0.00              | 0.42          |
| 3;IPFV;PST;SG;V | 41.95 (298)       | 32.49 (474)   | 80.87             | 74.47         |
| 1;PL;PRS;V      | 22.22 (108)       | 4.66 (472)    | 46.30             | 12.5          |
| 2;IPFV;PST;SG;V | 0.00 (3)          | 2.53 (474)    | 0.00              | 4.85          |
| 2;IPFV;PL;PST;V | 0.00 (1)          | 0.00 (474)    | 0.00              | 0.42          |
| 3;COND;PL;V     | 10.71 (56)        | 5.92 (473)    | 39.29             | 49.05         |
| 2;PFV;PL;PST;V  | -                 | 0.00 (473)    | -                 | 2.54          |
| 3;FUT;PL;V      | 37.50 (112)       | 20.51 (473)   | 83.93             | 88.79         |
| 3;FUT;SG;V      | 41.58 (190)       | 30.44 (473)   | 92.11             | 94.71         |
| 2;COND;PL;V     | 50.00 (2)         | 8.25 (473)    | 50.00             | 29.6          |
| 1;FUT;SG;V      | 35.90 (39)        | 15.43 (473)   | 58.97             | 40.59         |
| NFIN;V          | 40.52 (427)       | 37.13 (474)   | 92.04             | 85.86         |
| 3;IMP;POS;SG;V  | 27.24 (268)       | 18.86 (472)   | 43.66             | 30.93         |
| 3;PL;PRS;SBJV;V | 20.13 (159)       | 9.94 (473)    | 28.30             | 18.6          |
| 1;PFV;PST;SG;V  | 2.38 (42)         | 2.96 (473)    | 7.14              | 4.02          |
| 3;PFV;PL;PST;V  | 36.86 (255)       | 30.23 (473)   | 93.33             | 93.23         |
| 2;IMP;PL;POS;V  | 1.10 (181)        | 1.48 (473)    | 2.76              | 2.96          |
| 3;PL;PRS;V      | 32.57 (350)       | 25.16 (473)   | 72.29             | 60.04         |
| 2;PST;SBJV;SG;V | 22.22 (9)         | 2.11 (473)    | 22.22             | 5.07          |
| 2;IMP;POS;SG;V  | 29.64 (361)       | 22.83 (473)   | 46.81             | 35.94         |
| 2;PRS;SG;V      | 22.68 (194)       | 14.16 (473)   | 38.14             | 23.68         |
| 3;IPFV;PL;PST;V | 45.16 (248)       | 32.07 (474)   | 93.15             | 94.73         |
| 3;PST;SBJV;SG;V | 24.42 (172)       | 14.38 (473)   | 40.70             | 32.77         |
| 1;IPFV;PST;SG;V | 16.28 (43)        | 5.70 (474)    | 27.91             | 12.24         |
| 1;COND;SG;V     | 0.00 (53)         | 0.21 (473)    | 3.77              | 0.21          |
| 2;PL;PRS;V      | 1.10 (182)        | 1.48 (473)    | 3.30              | 3.17          |
| 3;COND;SG;V     | 8.62 (116)        | 4.65 (473)    | 33.62             | 13.53         |
| 1;IMP;PL;POS;V  | 22.64 (106)       | 4.66 (472)    | 45.28             | 12.5          |
| 3;PRS;SG;V      | 33.33 (420)       | 30.17 (474)   | 53.33             | 48.95         |
| 2;PRS;SBJV;SG;V | 29.17 (144)       | 18.82 (473)   | 50.00             | 30.87         |
| 1;PFV;PL;PST;V  | 0.00 (2)          | 1.06 (473)    | 0.00              | 1.48          |
| 2;PL;PRS;SBJV;V | 0.00 (31)         | 0.21 (472)    | 0.00              | 1.06          |
| 1;PST;SBJV;SG;V | 8.00 (25)         | 2.11 (473)    | 16.00             | 5.07          |
| 3;PL;PST;SBJV;V | 36.75 (117)       | 21.35 (473)   | 79.49             | 85.62         |
| 1;FUT;PL;V      | 40.00 (35)        | 19.66 (473)   | 51.43             | 57.29         |
| ADJ;MASC;SG     | 48.32 (416)       | 46.45 (437)   | 93.03             | 92.68         |
| ADJ;MASC;PL     | 51.74 (402)       | 49.05 (422)   | 93.28             | 93.13         |
| ADJ;FEM;SG      | 21.50 (414)       | 21.09 (422)   | 76.81             | 76.54         |
| ADJ;FEM;PL      | 50.66 (381)       | 50.13 (385)   | 94.23             | 93.51         |

Table 66: The performance of [Artetxe et al. \(2017\)](#)’s model on translating words belonging to a specific morphological category for the Italian–Catalan language pair (the grey numbers correspond to the dictionary sizes).

| Morph           | Italian–French    |               |                   |               |
|-----------------|-------------------|---------------|-------------------|---------------|
|                 | Normal (In vocab) | Normal (+OOV) | Lexeme (In vocab) | Lexeme (+OOV) |
| ALL             | 40.01 (12595)     | 20.75 (31419) | 76.20             | 49.39         |
| N;SG            | 48.04 (3106)      | 44.80 (3355)  | 86.67             | 85.31         |
| N;PL            | 48.91 (2333)      | 43.00 (2928)  | 89.84             | 87.67         |
| 3;PL;PST;SBJV;V | 0.00 (74)         | 0.00 (645)    | 0.00              | 0             |
| 1;PL;PST;SBJV;V | 0.00 (2)          | 0.00 (643)    | 0.00              | 0             |
| 1;FUT;PL;V      | 12.12 (33)        | 12.75 (643)   | 33.33             | 48.21         |
| 1;COND;PL;V     | 0.00 (9)          | 4.67 (643)    | 0.00              | 25.35         |
| 3;PL;PRS;V      | 41.44 (473)       | 33.49 (645)   | 82.66             | 70.08         |
| 1;COND;SG;V     | 33.85 (65)        | 23.64 (643)   | 78.46             | 85.23         |
| 1;PL;PRS;V      | 16.34 (153)       | 8.63 (637)    | 47.06             | 24.18         |
| 3;PFV;PST;SG;V  | 26.34 (448)       | 19.66 (646)   | 47.54             | 35.91         |
| 2;PFV;PST;SG;V  | 14.29 (7)         | 2.18 (643)    | 14.29             | 4.82          |
| NFIN;V          | 45.03 (573)       | 40.40 (646)   | 91.97             | 87.77         |
| 2;IMP;POS;SG;V  | 27.10 (487)       | 21.46 (643)   | 44.97             | 34.68         |
| 1;PRS;SG;V      | 22.64 (371)       | 14.31 (643)   | 38.01             | 23.02         |
| 1;IMP;PL;POS;V  | 16.34 (153)       | 8.63 (637)    | 47.06             | 24.18         |
| 3;PL;PRS;SBJV;V | 13.64 (220)       | 6.52 (644)    | 30.00             | 16.46         |
| 1;FUT;SG;V      | 41.18 (68)        | 20.22 (643)   | 83.82             | 62.21         |
| 2;IMP;PL;POS;V  | 1.98 (353)        | 1.56 (643)    | 6.80              | 5.13          |
| 1;PRS;SBJV;SG;V | 29.02 (417)       | 20.72 (642)   | 44.36             | 35.05         |
| 2;PFV;PL;PST;V  | 0.00 (3)          | 0.47 (643)    | 0.00              | 5.13          |
| 3;COND;PL;V     | 50.68 (73)        | 23.88 (645)   | 97.26             | 99.07         |
| 3;COND;SG;V     | 48.76 (121)       | 26.47 (646)   | 95.04             | 92.11         |
| 3;FUT;SG;V      | 40.00 (265)       | 27.40 (646)   | 82.26             | 68.58         |
| 2;PST;SBJV;SG;V | 0.00 (3)          | 1.56 (643)    | 0.00              | 4.35          |
| 3;PRS;SBJV;SG;V | 29.05 (420)       | 20.78 (645)   | 44.29             | 35.04         |
| 2;FUT;SG;V      | 0.00 (18)         | 0.31 (643)    | 0.00              | 1.71          |
| 1;PL;PRS;SBJV;V | 13.76 (109)       | 8.63 (637)    | 51.38             | 24.18         |
| 2;COND;SG;V     | 43.75 (16)        | 20.84 (643)   | 75.00             | 74.34         |
| 2;IPFV;PL;PST;V | -                 | 0.16 (643)    | -                 | 0.47          |
| 2;PRS;SG;V      | 29.66 (354)       | 19.00 (642)   | 45.48             | 32.24         |
| 3;IPFV;PST;SG;V | 43.12 (385)       | 33.90 (646)   | 83.90             | 78.79         |
| 3;FUT;PL;V      | 46.41 (153)       | 22.48 (645)   | 99.35             | 99.07         |
| 3;PFV;PL;PST;V  | 36.36 (352)       | 28.99 (645)   | 95.74             | 96.43         |
| 2;PRS;SBJV;SG;V | 30.25 (367)       | 20.72 (642)   | 45.78             | 35.05         |
| 1;IPFV;PL;PST;V | 0.00 (9)          | 0.47 (643)    | 0.00              | 0.93          |
| 2;IPFV;PST;SG;V | 13.64 (22)        | 2.02 (643)    | 22.73             | 6.84          |
| 2;COND;PL;V     | 0.00 (6)          | 0.62 (643)    | 0.00              | 5.29          |
| 2;FUT;PL;V      | 16.67 (12)        | 6.22 (643)    | 25.00             | 17.11         |
| 1;PFV;PST;SG;V  | 17.46 (63)        | 8.55 (643)    | 23.81             | 14.15         |
| 3;PRS;SG;V      | 31.10 (566)       | 28.17 (646)   | 51.59             | 44.89         |
| 2;PL;PRS;SBJV;V | 0.00 (29)         | 0.31 (637)    | 0.00              | 1.88          |
| 1;PST;SBJV;SG;V | 0.00 (8)          | 1.56 (643)    | 0.00              | 4.35          |
| 1;IPFV;PST;SG;V | 26.83 (41)        | 11.51 (643)   | 29.27             | 24.26         |
| 2;PL;PRS;V      | 2.27 (353)        | 1.71 (643)    | 7.08              | 5.13          |
| 2;PL;PST;SBJV;V | 0.00 (2)          | 0.47 (643)    | 0.00              | 5.13          |
| 1;PFV;PL;PST;V  | 0.00 (8)          | 0.62 (643)    | 12.50             | 2.8           |
| 3;PST;SBJV;SG;V | 1.13 (177)        | 4.33 (646)    | 2.82              | 13.93         |
| 3;IPFV;PL;PST;V | 43.83 (324)       | 32.87 (645)   | 97.84             | 95.81         |
| ADJ;FEM;SG      | 53.09 (631)       | 52.01 (646)   | 93.82             | 93.65         |
| ADJ;MASC;SG     | 54.39 (638)       | 52.23 (672)   | 92.32             | 92.26         |
| ADJ;FEM;PL      | 55.69 (598)       | 55.41 (601)   | 94.65             | 94.18         |
| ADJ;MASC;PL     | 56.93 (606)       | 54.57 (645)   | 94.06             | 93.18         |

Table 67: The performance of [Artetxe et al. \(2017\)](#)’s model on translating words belonging to a specific morphological category for the Italian–French language pair (the grey numbers correspond to the dictionary sizes).

| Italian–Portuguese |                   |               |                   |               |
|--------------------|-------------------|---------------|-------------------|---------------|
| Morph              | Normal (In vocab) | Normal (+OOV) | Lexeme (In vocab) | Lexeme (+OOV) |
| ALL                | 42.35 (10072)     | 20.51 (25704) | 76.68             | 47            |
| N;PL               | 46.49 (1968)      | 40.58 (2452)  | 86.38             | 85.32         |
| N;SG               | 46.72 (2650)      | 43.75 (2846)  | 84.98             | 84.12         |
| 2;COND;SG;V        | 0.00 (4)          | 0.00 (586)    | 0.00              | 0             |
| 1;PL;PRS;V         | 28.57 (112)       | 10.71 (579)   | 57.14             | 25.91         |
| 1;FUT;PL;V         | 53.85 (26)        | 22.01 (586)   | 69.23             | 73.72         |
| 3;PRS;SBJV;SG;V    | 23.64 (313)       | 16.21 (586)   | 38.02             | 25.6          |
| 1;IPFV;PST;SG;V    | 15.79 (38)        | 7.33 (587)    | 15.79             | 12.61         |
| 3;IMP;PL;POS;V     | 14.20 (162)       | 6.14 (586)    | 24.07             | 15.19         |
| 3;PRS;SG;V         | 38.41 (479)       | 32.03 (587)   | 56.37             | 47.19         |
| 3;COND;SG;V        | 15.32 (111)       | 4.61 (586)    | 29.73             | 10.75         |
| 3;IMP;POS;SG;V     | 23.64 (313)       | 16.21 (586)   | 38.02             | 25.6          |
| 1;PRS;SG;V         | 28.93 (280)       | 18.29 (585)   | 41.07             | 26.5          |
| 1;COND;PL;V        | 33.33 (12)        | 14.85 (586)   | 33.33             | 43.69         |
| 3;IPFV;PST;SG;V    | 50.00 (312)       | 34.41 (587)   | 79.81             | 75.3          |
| 3;PL;PRS;SBJV;V    | 14.20 (162)       | 6.14 (586)    | 24.07             | 15.19         |
| 3;PFV;PL;PST;V     | 50.68 (292)       | 31.69 (587)   | 95.21             | 90.8          |
| 1;IPFV;PL;PST;V    | 50.00 (8)         | 10.90 (587)   | 62.50             | 49.91         |
| 1;PL;PRS;SBJV;V    | 32.20 (59)        | 10.71 (579)   | 55.93             | 25.91         |
| 2;IPFV;PL;PST;V    | 0.00 (3)          | 0.00 (587)    | 0.00              | 1.36          |
| 1;COND;SG;V        | 0.00 (69)         | 0.00 (586)    | 0.00              | 0             |
| 2;PRS;SBJV;SG;V    | 24.38 (201)       | 16.21 (586)   | 40.80             | 25.6          |
| 3;FUT;SG;V         | 43.93 (173)       | 29.01 (586)   | 83.24             | 87.37         |
| 3;PFV;PST;SG;V     | 39.64 (386)       | 27.77 (587)   | 64.25             | 51.96         |
| 1;PRS;SBJV;SG;V    | 23.64 (313)       | 16.21 (586)   | 38.02             | 25.6          |
| 3;FUT;PL;V         | 33.70 (92)        | 14.68 (586)   | 92.39             | 94.71         |
| 3;COND;PL;V        | 22.03 (59)        | 7.17 (586)    | 52.54             | 37.03         |
| 1;PFV;PST;SG;V     | 10.17 (59)        | 1.36 (587)    | 16.95             | 3.58          |
| 2;FUT;SG;V         | 0.00 (14)         | 4.10 (586)    | 0.00              | 11.43         |
| 2;IMP;POS;SG;V     | 33.94 (436)       | 26.24 (587)   | 50.23             | 38.33         |
| 3;PL;PRS;V         | 43.20 (375)       | 32.03 (587)   | 74.67             | 62.52         |
| 2;PL;PRS;SBJV;V    | 20.00 (5)         | 0.52 (579)    | 20.00             | 0.86          |
| 2;PFV;PL;PST;V     | 0.00 (3)          | 0.17 (586)    | 0.00              | 3.07          |
| NFIN;V             | 46.25 (493)       | 40.89 (587)   | 93.91             | 85.86         |
| 2;COND;PL;V        | -                 | 0.00 (586)    | -                 | 0.34          |
| 3;IPFV;PL;PST;V    | 55.92 (245)       | 34.58 (587)   | 94.69             | 95.23         |
| 2;PFV;PST;SG;V     | 28.57 (7)         | 0.85 (586)    | 28.57             | 1.71          |
| 1;IMP;PL;POS;V     | 32.20 (59)        | 10.71 (579)   | 55.93             | 25.91         |
| 2;IMP;PL;POS;V     | 3.38 (148)        | 2.21 (587)    | 4.05              | 2.73          |
| 1;FUT;SG;V         | 44.19 (43)        | 22.35 (586)   | 72.09             | 72.7          |
| 2;IPFV;PST;SG;V    | 0.00 (4)          | 2.04 (587)    | 0.00              | 3.41          |
| 2;PRS;SG;V         | 21.17 (222)       | 14.70 (585)   | 34.23             | 22.91         |
| 2;PL;PRS;V         | 7.35 (68)         | 2.21 (587)    | 8.82              | 2.73          |
| 1;PFV;PL;PST;V     | 10.00 (10)        | 0.85 (586)    | 10.00             | 3.75          |
| 2;FUT;PL;V         | 0.00 (8)          | 0.00 (586)    | 0.00              | 0.17          |
| ADJ;MASC;SG        | 54.70 (532)       | 52.60 (557)   | 93.23             | 92.1          |
| ADJ;MASC;PL        | 55.58 (502)       | 52.90 (535)   | 94.22             | 94.02         |
| ADJ;FEM;SG         | 55.07 (523)       | 54.14 (532)   | 95.03             | 94.55         |
| ADJ;FEM;PL         | 57.32 (485)       | 55.56 (495)   | 95.26             | 94.75         |

Table 68: The performance of [Artetxe et al. \(2017\)](#)’s model on translating words belonging to a specific morphological category for the Italian–Portuguese language pair (the grey numbers correspond to the dictionary sizes).

| Morph           | Italian–Spanish   |               |                   |               |
|-----------------|-------------------|---------------|-------------------|---------------|
|                 | Normal (In vocab) | Normal (+OOV) | Lexeme (In vocab) | Lexeme (+OOV) |
| ALL             | 42.60 (11685)     | 20.98 (30686) | 76.19             | 47.58         |
| N;SG            | 48.58 (2756)      | 45.36 (2965)  | 86.79             | 85.43         |
| N;PL            | 45.98 (2092)      | 40.84 (2588)  | 85.80             | 84.62         |
| ADJ;FEM;SG      | 56.21 (596)       | 55.30 (604)   | 93.62             | 93.54         |
| ADJ;MASC;SG     | 53.69 (609)       | 51.66 (633)   | 91.95             | 91.79         |
| ADJ;MASC;PL     | 56.09 (583)       | 53.97 (617)   | 94.17             | 93.68         |
| ADJ;FEM;PL      | 56.54 (566)       | 56.57 (571)   | 91.52             | 91.59         |
| 1;PFV;PL;PST;V  | 0.00 (14)         | 4.82 (643)    | 7.14              | 8.86          |
| 2;IPFV;PST;SG;V | 11.11 (9)         | 2.48 (644)    | 22.22             | 5.9           |
| 3;PFV;PST;SG;V  | 37.56 (426)       | 28.26 (644)   | 63.15             | 52.48         |
| 3;PL;PRS;V      | 47.06 (442)       | 36.02 (644)   | 73.30             | 60.71         |
| 1;FUT;PL;V      | 51.52 (33)        | 20.96 (644)   | 81.82             | 64.13         |
| 1;PL;PRS;V      | 36.03 (136)       | 18.52 (637)   | 80.15             | 51.33         |
| 2;PFV;PL;PST;V  | 0.00 (1)          | 0.00 (643)    | 0.00              | 0.47          |
| 3;IPFV;PST;SG;V | 57.26 (365)       | 40.31 (645)   | 86.30             | 81.86         |
| 2;PL;PRS;V      | 4.81 (104)        | 1.71 (644)    | 4.81              | 2.95          |
| 1;COND;PL;V     | 44.44 (9)         | 19.57 (644)   | 77.78             | 80.43         |
| 3;FUT;PL;V      | 53.47 (144)       | 23.76 (644)   | 97.92             | 96.74         |
| 1;IPFV;PL;PST;V | 62.50 (8)         | 15.37 (644)   | 100.00            | 64.6          |
| 3;PRS;SG;V      | 40.18 (550)       | 35.04 (645)   | 59.82             | 49.92         |
| 3;COND;SG;V     | 16.24 (117)       | 5.58 (645)    | 41.88             | 11.32         |
| 2;PL;PST;SBJV;V | -                 | 0.00 (644)    | -                 | 0.47          |
| 1;FUT;SG;V      | 46.77 (62)        | 22.05 (644)   | 70.97             | 47.67         |
| 1;PFV;PST;SG;V  | 3.39 (59)         | 0.93 (643)    | 5.08              | 2.18          |
| 3;PRS;SBJV;SG;V | 28.85 (409)       | 22.52 (644)   | 43.52             | 34.94         |
| 1;PRS;SBJV;SG;V | 28.68 (408)       | 22.40 (643)   | 43.38             | 34.84         |
| 3;PL;PRS;SBJV;V | 17.09 (199)       | 8.40 (643)    | 28.14             | 15.4          |
| 1;PRS;SG;V      | 30.62 (369)       | 21.12 (644)   | 46.34             | 31.83         |
| 3;IMP;POS;SG;V  | 28.85 (409)       | 22.55 (643)   | 43.52             | 34.99         |
| 1;PL;PRS;SBJV;V | 37.07 (116)       | 18.52 (637)   | 79.31             | 51.33         |
| 2;IMP;PL;POS;V  | 3.35 (179)        | 1.67 (659)    | 4.47              | 2.88          |
| 3;FUT;SG;V      | 52.26 (243)       | 31.94 (645)   | 93.42             | 92.87         |
| 2;FUT;PL;V      | 33.33 (6)         | 7.45 (644)    | 50.00             | 25.31         |
| 1;PL;PST;SBJV;V | 0.00 (7)          | 1.71 (644)    | 0.00              | 10.56         |
| 3;IMP;PL;POS;V  | 17.17 (198)       | 8.41 (642)    | 28.28             | 15.42         |
| 3;PL;PST;SBJV;V | 1.52 (132)        | 4.97 (644)    | 6.06              | 21.43         |
| 3;IPFV;PL;PST;V | 60.55 (289)       | 36.80 (644)   | 98.27             | 97.36         |
| 2;PST;SBJV;SG;V | 0.00 (10)         | 2.95 (644)    | 0.00              | 5.75          |
| 3;PFV;PL;PST;V  | 51.78 (338)       | 36.08 (643)   | 97.04             | 93.62         |
| NFIN;V          | 45.27 (581)       | 40.70 (661)   | 92.25             | 86.99         |
| 3;COND;PL;V     | 24.59 (61)        | 9.32 (644)    | 57.38             | 46.89         |
| 2;PFV;PST;SG;V  | 0.00 (1)          | 0.16 (643)    | 0.00              | 1.09          |
| 1;IMP;PL;POS;V  | 36.21 (116)       | 17.94 (652)   | 79.31             | 52.3          |
| 1;IPFV;PST;SG;V | 12.50 (40)        | 6.83 (644)    | 12.50             | 11.96         |
| 2;PRS;SG;V      | 25.38 (331)       | 18.85 (642)   | 39.58             | 29.6          |
| 1;PST;SBJV;SG;V | 0.00 (26)         | 2.95 (644)    | 0.00              | 5.75          |
| 2;PL;PRS;SBJV;V | 0.00 (14)         | 0.00 (637)    | 0.00              | 0.31          |
| 2;IMP;POS;SG;V  | 35.92 (490)       | 27.92 (659)   | 54.29             | 40.06         |
| 2;IPFV;PL;PST;V | 0.00 (1)          | 0.47 (644)    | 0.00              | 0.78          |
| 2;COND;SG;V     | 16.67 (6)         | 0.62 (644)    | 33.33             | 2.17          |
| 2;COND;PL;V     | 0.00 (1)          | 2.33 (644)    | 0.00              | 14.75         |
| 1;COND;SG;V     | 1.54 (65)         | 0.00 (644)    | 1.54              | 0.16          |
| 3;PST;SBJV;SG;V | 13.20 (197)       | 11.32 (645)   | 23.86             | 28.37         |
| 2;PRS;SBJV;SG;V | 30.77 (338)       | 22.40 (643)   | 46.15             | 34.84         |
| 2;FUT;SG;V      | 30.00 (20)        | 12.58 (644)   | 50.00             | 36.96         |

Table 69: The performance of [Artetxe et al. \(2017\)](#)’s model on translating words belonging to a specific morphological category for the Italian–Spanish language pair (the grey numbers correspond to the dictionary sizes).



| Portuguese–Catalan |                   |               |                   |               |
|--------------------|-------------------|---------------|-------------------|---------------|
| Morph              | Normal (In vocab) | Normal (+OOV) | Lexeme (In vocab) | Lexeme (+OOV) |
| ALL                | 48.09 (7199)      | 28.12 (16059) | 78.39             | 51.02         |
| N;SG               | 53.63 (1527)      | 51.75 (1598)  | 87.10             | 86.48         |
| N;PL               | 53.69 (1274)      | 50.84 (1424)  | 91.13             | 90.8          |
| 3;FUT;PL;V         | 64.00 (75)        | 42.53 (348)   | 80.00             | 79.31         |
| 1;COND;PL;V        | 40.00 (5)         | 30.46 (348)   | 40.00             | 75.86         |
| NFIN;V             | 51.82 (330)       | 49.43 (348)   | 91.82             | 85.63         |
| 3;IPFV;PST;SG;V    | 56.52 (253)       | 45.98 (348)   | 86.96             | 80.75         |
| 1;FUT;PL;V         | 66.67 (21)        | 33.62 (348)   | 80.95             | 69.54         |
| 1;PFV;PL;PST;V     | 20.00 (5)         | 4.31 (348)    | 40.00             | 8.62          |
| 2;COND;SG;V        | 50.00 (2)         | 7.47 (348)    | 50.00             | 11.21         |
| 2;FUT;SG;V         | 0.00 (8)          | 9.48 (348)    | 12.50             | 17.82         |
| 1;IMP;PL;POS;V     | 17.86 (28)        | 12.10 (347)   | 35.71             | 21.9          |
| 2;PFV;PL;PST;V     | -                 | 0.29 (348)    | -                 | 1.15          |
| 1;PL;PRS;V         | 36.45 (107)       | 12.93 (348)   | 53.27             | 20.11         |
| 3;PRS;SG;V         | 42.63 (319)       | 41.50 (347)   | 61.13             | 57.64         |
| 3;IPFV;PL;PST;V    | 62.39 (218)       | 48.28 (348)   | 98.62             | 95.11         |
| 2;COND;PL;V        | -                 | 5.17 (348)    | -                 | 14.08         |
| 1;PL;PRS;SBJV;V    | 17.86 (28)        | 12.10 (347)   | 35.71             | 21.9          |
| 1;PRS;SG;V         | 25.29 (174)       | 15.90 (346)   | 37.93             | 25.14         |
| 3;IMP;PL;POS;V     | 25.31 (162)       | 15.85 (347)   | 37.04             | 30.55         |
| 2;PFV;PST;SG;V     | 0.00 (3)          | 0.29 (348)    | 0.00              | 0.86          |
| 3;PL;PRS;SBJV;V    | 25.31 (162)       | 15.85 (347)   | 37.04             | 30.55         |
| 2;PL;PRS;SBJV;V    | 0.00 (3)          | 2.31 (347)    | 0.00              | 3.75          |
| 3;PFV;PST;SG;V     | 38.63 (277)       | 33.62 (348)   | 56.32             | 50.86         |
| 2;PRS;SG;V         | 23.16 (95)        | 13.26 (347)   | 33.68             | 21.04         |
| 1;COND;SG;V        | 57.40 (169)       | 40.80 (348)   | 73.96             | 66.67         |
| 2;PL;PRS;V         | 28.57 (14)        | 1.72 (348)    | 35.71             | 2.01          |
| 1;IPFV;PST;SG;V    | 56.52 (253)       | 45.98 (348)   | 86.96             | 80.75         |
| 3;IMP;POS;SG;V     | 21.36 (220)       | 14.41 (347)   | 34.55             | 25.36         |
| 3;PFV;PL;PST;V     | 54.27 (234)       | 46.84 (348)   | 87.61             | 88.22         |
| 3;COND;PL;V        | 65.31 (98)        | 44.54 (348)   | 83.67             | 80.17         |
| 1;FUT;SG;V         | 51.61 (31)        | 31.32 (348)   | 67.74             | 50.57         |
| 3;PL;PRS;V         | 46.64 (283)       | 41.50 (347)   | 79.15             | 70.32         |
| 3;COND;SG;V        | 57.40 (169)       | 40.80 (348)   | 73.96             | 66.67         |
| 3;PRS;SBJV;SG;V    | 21.27 (221)       | 14.41 (347)   | 34.39             | 25.36         |
| 2;PRS;SBJV;SG;V    | 7.14 (42)         | 2.59 (347)    | 16.67             | 6.63          |
| 3;FUT;SG;V         | 69.12 (136)       | 48.56 (348)   | 92.65             | 86.21         |
| 2;IMP;PL;POS;V     | 2.44 (41)         | 0.29 (348)    | 4.88              | 2.59          |
| 2;IPFV;PL;PST;V    | 60.00 (5)         | 2.30 (348)    | 80.00             | 3.45          |
| 2;IMP;POS;SG;V     | 42.72 (316)       | 40.92 (347)   | 61.39             | 57.06         |
| 1;IPFV;PL;PST;V    | 0.00 (9)          | 12.93 (348)   | 44.44             | 62.93         |
| 1;PFV;PST;SG;V     | 1.25 (80)         | 0.57 (348)    | 2.50              | 1.72          |
| 2;FUT;PL;V         | 0.00 (1)          | 7.76 (348)    | 0.00              | 12.36         |
| 1;PRS;SBJV;SG;V    | 21.27 (221)       | 14.41 (347)   | 34.39             | 25.36         |
| 2;IPFV;PST;SG;V    | 0.00 (2)          | 3.74 (348)    | 0.00              | 6.9           |
| ADJ;MASC;PL        | 64.66 (365)       | 61.65 (399)   | 96.44             | 96.24         |
| ADJ;FEM;SG         | 23.90 (385)       | 23.66 (393)   | 74.03             | 73.54         |
| ADJ;MASC;SG        | 59.90 (384)       | 58.46 (402)   | 93.49             | 92.79         |
| ADJ;FEM;PL         | 64.15 (357)       | 63.01 (365)   | 96.92             | 96.44         |

Table 70: The performance of [Artetxe et al. \(2017\)](#)’s model on translating words belonging to a specific morphological category for the Portuguese–Catalan language pair (the grey numbers correspond to the dictionary sizes).

| Morph           | Portuguese–French |               |                   |               |
|-----------------|-------------------|---------------|-------------------|---------------|
|                 | Normal (In vocab) | Normal (+OOV) | Lexeme (In vocab) | Lexeme (+OOV) |
| ALL             | 47.09 (9664)      | 25.92 (22437) | 77.70             | 48.19         |
| N;SG            | 53.37 (2095)      | 51.46 (2188)  | 87.40             | 86.56         |
| N;PL            | 53.26 (1641)      | 49.44 (1960)  | 93.42             | 92.4          |
| 1;COND;PL;V     | 0.00 (10)         | 18.90 (492)   | 40.00             | 59.15         |
| 1;PRS;SBJV;SG;V | 21.36 (323)       | 18.13 (491)   | 30.65             | 26.68         |
| 2;COND;PL;V     | -                 | 0.00 (492)    | -                 | 1.02          |
| 1;COND;SG;V     | 30.82 (159)       | 18.50 (492)   | 46.54             | 38.62         |
| 1;IPFV;PL;PST;V | 0.00 (10)         | 1.63 (492)    | 20.00             | 4.88          |
| 2;PL;PRS;V      | 16.67 (24)        | 1.02 (492)    | 29.17             | 2.03          |
| 1;PRS;SG;V      | 22.35 (264)       | 15.48 (491)   | 35.98             | 23.63         |
| 1;IMP;PL;POS;V  | 17.50 (40)        | 7.13 (491)    | 52.50             | 23.01         |
| 1;FUT;SG;V      | 45.10 (51)        | 37.80 (492)   | 84.31             | 79.47         |
| 2;IMP;PL;POS;V  | 1.49 (67)         | 0.20 (492)    | 2.99              | 2.24          |
| 2;PFV;PST;SG;V  | 0.00 (19)         | 0.81 (491)    | 0.00              | 1.63          |
| 1;PL;PRS;SBJV;V | 18.18 (33)        | 7.13 (491)    | 57.58             | 23.01         |
| 3;PRS;SBJV;SG;V | 21.36 (323)       | 18.05 (493)   | 30.65             | 26.77         |
| 1;PFV;PST;SG;V  | 2.26 (133)        | 2.04 (491)    | 2.26              | 4.28          |
| 2;FUT;SG;V      | 25.00 (8)         | 7.52 (492)    | 25.00             | 17.48         |
| 2;IMP;POS;SG;V  | 42.26 (452)       | 38.49 (491)   | 57.52             | 51.32         |
| 2;PFV;PL;PST;V  | 0.00 (3)          | 1.83 (491)    | 0.00              | 7.13          |
| 3;COND;SG;V     | 29.21 (202)       | 18.42 (494)   | 42.57             | 38.46         |
| 2;FUT;PL;V      | 0.00 (1)          | 2.44 (492)    | 0.00              | 6.71          |
| 2;PRS;SBJV;SG;V | 19.05 (105)       | 13.44 (491)   | 48.57             | 27.7          |
| 3;PL;PRS;SBJV;V | 36.87 (198)       | 26.27 (491)   | 63.64             | 52.14         |
| 2;IPFV;PL;PST;V | 19.51 (41)        | 2.03 (492)    | 31.71             | 4.07          |
| 1;IPFV;PST;SG;V | 54.04 (235)       | 46.75 (492)   | 87.66             | 83.13         |
| 3;FUT;SG;V      | 49.38 (160)       | 30.97 (494)   | 71.25             | 53.44         |
| 3;PRS;SG;V      | 42.04 (452)       | 38.13 (493)   | 57.96             | 51.32         |
| 2;IPFV;PST;SG;V | 0.00 (7)          | 0.20 (492)    | 42.86             | 0.81          |
| 1;FUT;PL;V      | 50.00 (26)        | 26.63 (492)   | 73.08             | 63.62         |
| 3;FUT;PL;V      | 56.10 (82)        | 34.35 (492)   | 87.80             | 77.03         |
| 2;PRS;SG;V      | 23.81 (126)       | 13.65 (491)   | 53.17             | 27.9          |
| 3;COND;PL;V     | 34.48 (116)       | 18.50 (492)   | 51.72             | 40.24         |
| 3;IPFV;PST;SG;V | 53.15 (333)       | 46.56 (494)   | 86.49             | 83.2          |
| 2;PL;PRS;SBJV;V | -                 | 0.81 (491)    | -                 | 1.63          |
| 1;PL;PRS;V      | 29.01 (131)       | 11.18 (492)   | 47.33             | 22.56         |
| 1;PFV;PL;PST;V  | 11.11 (18)        | 7.94 (491)    | 27.78             | 12.42         |
| 3;PFV;PL;PST;V  | 53.09 (324)       | 42.36 (491)   | 89.20             | 89            |
| NFIN;V          | 56.59 (463)       | 52.83 (494)   | 89.42             | 85.22         |
| 3;PFV;PST;SG;V  | 33.83 (405)       | 28.80 (493)   | 53.09             | 45.64         |
| 2;COND;SG;V     | 0.00 (5)          | 0.00 (492)    | 20.00             | 0.41          |
| 3;PL;PRS;V      | 54.96 (373)       | 45.82 (491)   | 89.01             | 80.04         |
| 3;IPFV;PL;PST;V | 58.39 (274)       | 46.75 (492)   | 94.16             | 95.12         |
| ADJ;FEM;SG      | 60.40 (500)       | 60.04 (503)   | 93.60             | 93.64         |
| ADJ;MASC;PL     | 59.10 (489)       | 56.51 (522)   | 96.52             | 95.98         |
| ADJ;FEM;PL      | 62.26 (469)       | 61.38 (479)   | 97.87             | 97.7          |
| ADJ;MASC;SG     | 58.90 (511)       | 57.77 (528)   | 91.39             | 91.29         |

Table 71: The performance of [Artetxe et al. \(2017\)](#)’s model on translating words belonging to a specific morphological category for the Portuguese–French language pair (the grey numbers correspond to the dictionary sizes).

| Morph           | Portuguese–Italian |               |                   |               |
|-----------------|--------------------|---------------|-------------------|---------------|
|                 | Normal (In vocab)  | Normal (+OOV) | Lexeme (In vocab) | Lexeme (+OOV) |
| ALL             | 45.82 (8939)       | 24.83 (20757) | 77.48             | 48.9          |
| N;SG            | 55.29 (2069)       | 53.17 (2159)  | 90.04             | 89.62         |
| N;PL            | 49.12 (1598)       | 45.55 (1888)  | 87.98             | 85.38         |
| 3;IPFV;PL;PST;V | 56.18 (251)        | 46.24 (452)   | 96.41             | 96.9          |
| 1;FUT;PL;V      | 23.81 (21)         | 19.69 (452)   | 61.90             | 61.28         |
| 1;IPFV;PL;PST;V | 37.50 (8)          | 20.35 (452)   | 87.50             | 77.21         |
| 2;FUT;SG;V      | 0.00 (6)           | 3.10 (452)    | 16.67             | 14.82         |
| 2;COND;PL;V     | -                  | 0.00 (452)    | -                 | 1.55          |
| 2;IPFV;PL;PST;V | 50.00 (4)          | 1.99 (452)    | 75.00             | 3.76          |
| 3;PL;PRS;V      | 50.87 (346)        | 45.01 (451)   | 84.39             | 75.61         |
| 2;IMP;PL;POS;V  | 0.00 (58)          | 0.00 (452)    | 3.45              | 1.33          |
| 3;IMP;PL;POS;V  | 13.07 (176)        | 7.32 (451)    | 26.14             | 15.74         |
| 3;PL;PRS;SBJV;V | 13.07 (176)        | 7.32 (451)    | 26.14             | 15.74         |
| 2;PFV;PL;PST;V  | 0.00 (5)           | 4.42 (452)    | 0.00              | 9.96          |
| 1;COND;PL;V     | 57.14 (7)          | 23.67 (452)   | 85.71             | 74.12         |
| 3;FUT;SG;V      | 40.44 (136)        | 27.88 (452)   | 70.59             | 59.29         |
| 2;IMP;POS;SG;V  | 44.61 (408)        | 43.02 (451)   | 65.69             | 61.64         |
| 3;PRS;SBJV;SG;V | 16.67 (294)        | 12.64 (451)   | 28.91             | 19.96         |
| 3;PFV;PST;SG;V  | 43.35 (376)        | 38.72 (452)   | 72.07             | 69.69         |
| 1;IMP;PL;POS;V  | 26.92 (26)         | 17.07 (451)   | 53.85             | 56.76         |
| 2;PFV;PST;SG;V  | 0.00 (7)           | 1.33 (452)    | 0.00              | 2.21          |
| 1;PL;PRS;SBJV;V | 26.92 (26)         | 17.07 (451)   | 53.85             | 56.76         |
| 1;PFV;PL;PST;V  | 11.11 (18)         | 2.21 (452)    | 22.22             | 7.08          |
| 3;COND;PL;V     | 2.35 (85)          | 0.66 (452)    | 2.35              | 3.32          |
| 2;COND;SG;V     | 16.67 (6)          | 0.44 (452)    | 33.33             | 1.33          |
| 3;IMP;POS;SG;V  | 16.67 (294)        | 12.64 (451)   | 28.91             | 19.96         |
| NFIN;V          | 53.74 (428)        | 51.99 (452)   | 97.20             | 95.13         |
| 1;FUT;SG;V      | 27.27 (44)         | 20.35 (452)   | 54.55             | 51.99         |
| 1;COND;SG;V     | 5.47 (128)         | 1.55 (452)    | 9.38              | 7.96          |
| 1;IPFV;PST;SG;V | 48.99 (149)        | 44.03 (452)   | 87.25             | 82.52         |
| 2;FUT;PL;V      | 0.00 (1)           | 0.44 (452)    | 0.00              | 5.75          |
| 3;PRS;SG;V      | 44.84 (417)        | 43.02 (451)   | 65.95             | 61.64         |
| 2;PRS;SBJV;SG;V | 13.19 (91)         | 6.21 (451)    | 36.26             | 13.75         |
| 2;PL;PRS;SBJV;V | 0.00 (1)           | 0.67 (451)    | 0.00              | 2.88          |
| 1;PRS;SBJV;SG;V | 16.67 (294)        | 12.64 (451)   | 28.91             | 19.96         |
| 2;PRS;SG;V      | 20.00 (130)        | 6.87 (451)    | 31.54             | 11.53         |
| 3;IPFV;PST;SG;V | 50.00 (310)        | 44.03 (452)   | 86.77             | 82.52         |
| 2;IPFV;PST;SG;V | 20.00 (5)          | 1.55 (452)    | 40.00             | 1.99          |
| 3;FUT;PL;V      | 50.00 (64)         | 26.11 (452)   | 82.81             | 71.68         |
| 3;PFV;PL;PST;V  | 53.97 (302)        | 46.68 (452)   | 95.36             | 95.35         |
| 3;COND;SG;V     | 4.43 (158)         | 1.55 (452)    | 8.86              | 7.96          |
| 2;PL;PRS;V      | 26.47 (34)         | 5.09 (452)    | 47.06             | 14.82         |
| 1;PFV;PST;SG;V  | 0.81 (124)         | 1.55 (452)    | 0.81              | 2.43          |
| 1;PRS;SG;V      | 25.93 (243)        | 20.18 (451)   | 44.86             | 32.82         |
| 1;PL;PRS;V      | 28.70 (108)        | 17.26 (452)   | 67.59             | 48.45         |
| ADJ;MASC;PL     | 62.88 (431)        | 59.70 (464)   | 96.52             | 95.47         |
| ADJ;FEM;PL      | 61.56 (424)        | 61.36 (427)   | 94.10             | 94.15         |
| ADJ;MASC;SG     | 62.05 (448)        | 60.17 (467)   | 92.63             | 91.65         |
| ADJ;FEM;SG      | 63.37 (445)        | 63.37 (445)   | 92.58             | 92.13         |

Table 72: The performance of [Artetxe et al. \(2017\)](#)’s model on translating words belonging to a specific morphological category for the Portuguese–Italian language pair (the grey numbers correspond to the dictionary sizes).

| Portuguese–Spanish |                   |               |                   |               |
|--------------------|-------------------|---------------|-------------------|---------------|
| Morph              | Normal (In vocab) | Normal (+OOV) | Lexeme (In vocab) | Lexeme (+OOV) |
| ALL                | 60.18 (9275)      | 37.38 (22638) | 84.66             | 57.89         |
| N;SG               | 64.43 (1940)      | 62.28 (2015)  | 89.74             | 88.98         |
| N;PL               | 64.66 (1576)      | 61.07 (1816)  | 92.45             | 91.63         |
| ADJ;FEM;SG         | 64.76 (542)       | 64.40 (545)   | 93.54             | 93.58         |
| ADJ;MASC;SG        | 65.75 (543)       | 63.77 (563)   | 93.00             | 92.72         |
| ADJ;MASC;PL        | 69.77 (526)       | 66.37 (559)   | 96.77             | 96.78         |
| ADJ;FEM;PL         | 69.46 (514)       | 68.45 (523)   | 96.89             | 96.75         |
| 2;FUT;PL;V         | 25.00 (4)         | 15.08 (451)   | 50.00             | 33.04         |
| 3;PL;PRS;V         | 60.53 (342)       | 50.89 (450)   | 82.46             | 71.56         |
| 2;PFV;PL;PST;V     | 0.00 (2)          | 0.00 (451)    | 0.00              | 0.44          |
| 3;IPFV;PL;PST;V    | 69.92 (256)       | 55.43 (451)   | 99.22             | 97.78         |
| 3;PFV;PST;SG;V     | 56.39 (360)       | 48.34 (451)   | 78.89             | 72.95         |
| 3;FUT;PL;SBJV;V    | 0.00 (30)         | 0.22 (451)    | 0.00              | 0.22          |
| 2;IMP;POS;SG;V     | 52.70 (408)       | 48.89 (450)   | 68.87             | 62.44         |
| 3;FUT;PL;V         | 78.38 (74)        | 55.21 (451)   | 97.30             | 88.69         |
| 1;COND;SG;V        | 63.13 (198)       | 47.67 (451)   | 82.83             | 69.84         |
| 3;IMP;POS;SG;V     | 46.71 (289)       | 35.94 (448)   | 58.13             | 43.75         |
| 2;IMP;PL;POS;V     | 4.26 (47)         | 8.20 (451)    | 14.89             | 13.3          |
| 2;FUT;PL;SBJV;V    | -                 | 0.00 (451)    | -                 | 0.89          |
| 1;IMP;PL;POS;V     | 47.06 (34)        | 28.12 (448)   | 55.88             | 42.41         |
| 2;FUT;SG;V         | 54.55 (11)        | 29.71 (451)   | 72.73             | 48.34         |
| 3;PFV;PL;PST;V     | 67.79 (298)       | 56.32 (451)   | 95.30             | 92.24         |
| 2;PL;PRS;V         | 13.33 (15)        | 2.00 (451)    | 20.00             | 2.22          |
| 2;COND;SG;V        | 0.00 (5)          | 30.38 (451)   | 60.00             | 51.66         |
| 2;COND;PL;V        | 0.00 (1)          | 1.55 (451)    | 0.00              | 4.66          |
| 2;PRS;SG;V         | 49.18 (122)       | 37.56 (450)   | 60.66             | 48            |
| 3;COND;PL;V        | 73.74 (99)        | 53.88 (451)   | 93.94             | 92.24         |
| 2;PRS;SBJV;SG;V    | 43.62 (94)        | 29.62 (449)   | 64.89             | 41.87         |
| 3;IPFV;PST;SG;V    | 68.77 (301)       | 56.54 (451)   | 90.03             | 85.81         |
| 2;FUT;SBJV;SG;V    | 14.29 (7)         | 25.94 (451)   | 28.57             | 31.49         |
| 1;FUT;PL;SBJV;V    | -                 | 0.00 (451)    | -                 | 0.22          |
| 2;IPFV;PST;SG;V    | 14.29 (7)         | 9.98 (451)    | 42.86             | 12.64         |
| 2;PFV;PST;SG;V     | 47.62 (21)        | 28.82 (451)   | 52.38             | 37.92         |
| 1;FUT;SG;V         | 66.67 (48)        | 46.78 (451)   | 87.50             | 73.61         |
| 1;PFV;PST;SG;V     | 19.02 (163)       | 10.64 (451)   | 34.36             | 20.84         |
| 2;PL;PRS;SBJV;V    | 25.00 (4)         | 1.34 (449)    | 25.00             | 3.12          |
| 1;IPFV;PST;SG;V    | 68.77 (301)       | 56.54 (451)   | 90.03             | 85.81         |
| 1;PL;PRS;V         | 68.10 (116)       | 45.68 (451)   | 80.17             | 59.65         |
| 1;FUT;PL;V         | 65.52 (29)        | 49.45 (451)   | 82.76             | 82.93         |
| 3;PRS;SG;V         | 52.93 (410)       | 49.11 (450)   | 69.27             | 62.67         |
| NFIN;V             | 55.90 (424)       | 53.66 (451)   | 91.27             | 87.8          |
| 3;IMP;PL;POS;V     | 42.71 (192)       | 25.17 (449)   | 59.38             | 39.87         |
| 3;PL;PRS;SBJV;V    | 42.71 (192)       | 25.17 (449)   | 59.38             | 39.87         |
| 1;PRS;SBJV;SG;V    | 46.90 (290)       | 36.08 (449)   | 58.28             | 43.88         |
| 1;IPFV;PL;PST;V    | 30.77 (13)        | 27.05 (451)   | 100.00            | 90.24         |
| 3;FUT;SBJV;SG;V    | 66.43 (140)       | 52.55 (451)   | 90.71             | 86.03         |
| 3;COND;SG;V        | 63.13 (198)       | 47.67 (451)   | 82.83             | 69.84         |
| 1;FUT;SBJV;SG;V    | 66.43 (140)       | 52.55 (451)   | 90.71             | 86.03         |
| 3;FUT;SG;V         | 79.05 (148)       | 57.65 (451)   | 95.95             | 90.91         |
| 1;PL;PRS;SBJV;V    | 47.06 (34)        | 28.06 (449)   | 55.88             | 42.32         |
| 1;PRS;SG;V         | 41.77 (237)       | 31.99 (447)   | 52.74             | 41.16         |
| 2;IPFV;PL;PST;V    | 0.00 (2)          | 1.77 (451)    | 50.00             | 2.22          |
| 3;PRS;SBJV;SG;V    | 46.90 (290)       | 36.08 (449)   | 58.28             | 43.88         |
| 1;COND;PL;V        | 75.00 (8)         | 47.01 (451)   | 100.00            | 93.13         |
| 1;PFV;PL;PST;V     | 50.00 (46)        | 21.29 (451)   | 63.04             | 29.05         |

Table 73: The performance of [Artetxe et al. \(2017\)](#)’s model on translating words belonging to a specific morphological category for the Portuguese–Spanish language pair (the grey numbers correspond to the dictionary sizes).

| Morph           | Spanish–Catalan   |               |                   |               |
|-----------------|-------------------|---------------|-------------------|---------------|
|                 | Normal (In vocab) | Normal (+OOV) | Lexeme (In vocab) | Lexeme (+OOV) |
| ALL             | 49.23 (8291)      | 29.31 (18442) | 76.50             | 50.48         |
| N;SG            | 59.67 (1639)      | 58.94 (1666)  | 89.81             | 89.08         |
| N;PL            | 58.86 (1388)      | 56.23 (1542)  | 91.57             | 91.18         |
| ADJ;FEM;SG      | 31.85 (383)       | 31.52 (387)   | 76.76             | 77            |
| ADJ;MASC;SG     | 68.15 (383)       | 67.35 (389)   | 94.52             | 94.6          |
| ADJ;FEM;PL      | 73.48 (362)       | 72.68 (366)   | 94.75             | 94.81         |
| ADJ;MASC;PL     | 70.08 (371)       | 67.70 (387)   | 95.96             | 96.12         |
| 1;FUT;PL;V      | 41.03 (39)        | 45.26 (369)   | 66.67             | 88.62         |
| 2;PFV;PST;SG;V  | 0.00 (2)          | 0.00 (369)    | 0.00              | 0             |
| 2;IMP;PL;POS;V  | 2.70 (37)         | 0.27 (369)    | 5.41              | 1.9           |
| 2;PRS;SG;V      | 34.27 (143)       | 21.68 (369)   | 41.26             | 26.56         |
| 2;PST;SBJV;SG;V | 66.67 (3)         | 0.54 (369)    | 66.67             | 1.08          |
| 3;PFV;PL;PST;V  | 52.87 (244)       | 48.51 (369)   | 88.52             | 93.77         |
| 2;PFV;PL;PST;V  | -                 | 0.00 (369)    | -                 | 0.27          |
| 1;PL;PRS;SBJV;V | 29.85 (67)        | 14.91 (369)   | 53.73             | 21.41         |
| 2;COND;PL;V     | 0.00 (3)          | 3.25 (369)    | 0.00              | 8.94          |
| 3;IMP;POS;SG;V  | 19.53 (256)       | 17.07 (369)   | 32.42             | 26.56         |
| 1;PRS;SG;V      | 29.25 (212)       | 22.62 (367)   | 42.92             | 33.51         |
| 1;PL;PRS;V      | 29.32 (133)       | 10.03 (369)   | 42.86             | 14.09         |
| 3;PL;PRS;V      | 44.69 (320)       | 42.01 (369)   | 74.06             | 67.21         |
| 3;IPFV;PST;SG;V | 54.30 (291)       | 49.32 (369)   | 87.29             | 86.18         |
| 1;IPFV;PST;SG;V | 54.30 (291)       | 49.32 (369)   | 87.29             | 86.18         |
| 3;PL;PRS;SBJV;V | 20.20 (203)       | 15.45 (369)   | 33.00             | 29            |
| 3;PRS;SG;V      | 52.30 (348)       | 51.22 (369)   | 64.66             | 60.7          |
| 2;IPFV;PST;SG;V | 0.00 (7)          | 3.52 (369)    | 0.00              | 5.15          |
| 3;FUT;SG;V      | 59.36 (187)       | 50.95 (369)   | 87.17             | 94.04         |
| 3;COND;PL;V     | 56.06 (132)       | 50.41 (369)   | 73.48             | 90.79         |
| 3;COND;SG;V     | 49.25 (201)       | 36.31 (369)   | 66.67             | 57.99         |
| 2;PL;PST;SBJV;V | -                 | 0.00 (369)    | -                 | 2.98          |
| 2;FUT;PL;V      | 0.00 (6)          | 2.17 (369)    | 0.00              | 2.71          |
| 3;PST;SBJV;SG;V | 47.59 (166)       | 30.08 (369)   | 59.64             | 47.15         |
| 1;PL;PST;SBJV;V | 66.67 (3)         | 0.81 (369)    | 66.67             | 5.42          |
| 3;FUT;PL;V      | 45.32 (139)       | 43.36 (369)   | 68.35             | 83.47         |
| 3;IMP;PL;POS;V  | 20.20 (203)       | 15.45 (369)   | 33.00             | 29            |
| 2;COND;SG;V     | 0.00 (3)          | 1.36 (369)    | 0.00              | 2.17          |
| 1;PRS;SBJV;SG;V | 19.53 (256)       | 17.07 (369)   | 32.42             | 26.56         |
| 1;PFV;PL;PST;V  | 33.33 (6)         | 7.86 (369)    | 33.33             | 11.38         |
| 2;IPFV;PL;PST;V | 0.00 (2)          | 0.54 (369)    | 0.00              | 1.36          |
| 1;IMP;PL;POS;V  | 29.85 (67)        | 14.91 (369)   | 53.73             | 21.41         |
| 2;PL;PRS;SBJV;V | 31.25 (16)        | 3.52 (369)    | 50.00             | 8.94          |
| 2;PL;PRS;V      | 5.00 (20)         | 1.63 (369)    | 10.00             | 4.34          |
| 1;PFV;PST;SG;V  | 1.41 (71)         | 1.36 (369)    | 4.23              | 1.63          |
| 1;FUT;SG;V      | 37.50 (40)        | 45.26 (369)   | 47.50             | 71.82         |
| 1;COND;PL;V     | 42.86 (7)         | 39.57 (369)   | 85.71             | 88.62         |
| 3;IPFV;PL;PST;V | 55.69 (255)       | 49.59 (369)   | 94.90             | 95.93         |
| 1;IPFV;PL;PST;V | 25.00 (4)         | 17.07 (369)   | 50.00             | 63.96         |
| 3;PRS;SBJV;SG;V | 19.53 (256)       | 17.07 (369)   | 32.42             | 26.56         |
| 3;PL;PST;SBJV;V | 65.55 (119)       | 39.02 (369)   | 92.44             | 86.72         |
| 1;PST;SBJV;SG;V | 47.59 (166)       | 30.08 (369)   | 59.64             | 47.15         |
| 2;FUT;SG;V      | 25.00 (12)        | 10.03 (369)   | 33.33             | 18.16         |
| 1;COND;SG;V     | 49.25 (201)       | 36.31 (369)   | 66.67             | 57.99         |
| 3;PFV;PST;SG;V  | 36.73 (294)       | 32.79 (369)   | 56.12             | 50.14         |
| 2;IMP;POS;SG;V  | 52.17 (345)       | 50.68 (369)   | 64.35             | 59.89         |
| 2;PRS;SBJV;SG;V | 18.60 (86)        | 7.86 (369)    | 20.93             | 10.3          |
| NFIN;V          | 53.91 (358)       | 52.85 (369)   | 91.90             | 88.35         |

Table 74: The performance of [Artetxe et al. \(2017\)](#)’s model on translating words belonging to a specific morphological category for the Spanish–Catalan language pair (the grey numbers correspond to the dictionary sizes).

| Morph           | Normal (In vocab) | Spanish–French |                   |               |
|-----------------|-------------------|----------------|-------------------|---------------|
|                 |                   | Normal (+OOV)  | Lexeme (In vocab) | Lexeme (+OOV) |
| ALL             | 45.42 (11457)     | 24.10 (25775)  | 74.57             | 44.52         |
| N;PL            | 57.16 (1886)      | 53.70 (2162)   | 94.17             | 92.51         |
| N;SG            | 56.24 (2301)      | 55.31 (2352)   | 88.48             | 88.27         |
| 3;PRS;SBJV;SG;V | 20.68 (382)       | 15.98 (513)    | 34.82             | 26.71         |
| 2;IMP;PL;POS;V  | 2.27 (44)         | 0.97 (513)     | 6.82              | 4.68          |
| 2;PRS;SBJV;SG;V | 25.27 (182)       | 14.81 (513)    | 45.05             | 23.78         |
| 1;FUT;PL;V      | 28.30 (53)        | 27.49 (513)    | 54.72             | 70.57         |
| 1;PFV;PST;SG;V  | 0.91 (110)        | 1.36 (513)     | 0.91              | 1.75          |
| 2;IPFV;PL;PST;V | 0.00 (1)          | 0.19 (513)     | 100.00            | 1.17          |
| 1;PFV;PL;PST;V  | 20.00 (60)        | 10.72 (513)    | 50.00             | 24.17         |
| 1;PL;PRS;SBJV;V | 17.65 (68)        | 7.60 (513)     | 36.76             | 22.42         |
| 2;IPFV;PST;SG;V | 20.00 (15)        | 4.48 (513)     | 26.67             | 8.19          |
| 3;PL;PRS;SBJV;V | 31.96 (291)       | 20.47 (513)    | 55.33             | 39.18         |
| 2;PL;PRS;SBJV;V | 0.00 (12)         | 1.17 (513)     | 0.00              | 2.73          |
| 3;PRS;SG;V      | 38.22 (484)       | 36.06 (513)    | 58.68             | 53.61         |
| 3;PFV;PST;SG;V  | 31.41 (417)       | 25.93 (513)    | 48.68             | 39.57         |
| 2;PL;PST;SBJV;V | -                 | 0.19 (513)     | -                 | 2.14          |
| 2;PL;PRS;V      | 0.00 (27)         | 3.12 (513)     | 3.70              | 7.6           |
| 2;PFV;PL;PST;V  | -                 | 0.78 (513)     | -                 | 1.17          |
| 2;COND;SG;V     | 0.00 (9)          | 1.36 (513)     | 22.22             | 4.09          |
| 2;COND;PL;V     | -                 | 2.92 (513)     | -                 | 15.59         |
| 3;PST;SBJV;SG;V | 2.60 (154)        | 7.21 (513)     | 8.44              | 18.32         |
| 1;PRS;SBJV;SG;V | 20.68 (382)       | 15.98 (513)    | 34.82             | 26.71         |
| 2;FUT;PL;V      | 20.00 (5)         | 3.70 (513)     | 20.00             | 9.16          |
| 1;PRS;SG;V      | 20.28 (360)       | 16.63 (511)    | 33.33             | 26.22         |
| 1;IPFV;PL;PST;V | 0.00 (15)         | 0.58 (513)     | 6.67              | 2.92          |
| 2;IMP;POS;SG;V  | 38.03 (476)       | 35.28 (513)    | 58.40             | 52.44         |
| 3;COND;SG;V     | 25.30 (249)       | 18.91 (513)    | 45.78             | 45.81         |
| 2;FUT;SG;V      | 0.00 (24)         | 0.78 (513)     | 0.00              | 3.51          |
| 3;FUT;SG;V      | 45.90 (244)       | 32.94 (513)    | 75.00             | 68.62         |
| 1;IPFV;PST;SG;V | 54.51 (266)       | 44.83 (513)    | 86.47             | 80.51         |
| 3;FUT;PL;V      | 54.44 (169)       | 39.38 (513)    | 91.72             | 95.32         |
| 2;PFV;PST;SG;V  | 0.00 (49)         | 0.19 (513)     | 0.00              | 0.39          |
| 3;IPFV;PST;SG;V | 53.23 (387)       | 44.83 (513)    | 86.30             | 80.51         |
| 2;PST;SBJV;SG;V | 0.00 (3)          | 0.19 (513)     | 0.00              | 3.12          |
| 3;PL;PRS;V      | 48.96 (431)       | 41.72 (513)    | 83.29             | 73.88         |
| 1;COND;SG;V     | 27.18 (195)       | 18.91 (513)    | 50.26             | 45.81         |
| 1;PL;PRS;V      | 25.15 (167)       | 12.28 (513)    | 46.11             | 26.9          |
| 1;PL;PST;SBJV;V | 0.00 (1)          | 0.00 (513)     | 0.00              | 0             |
| 3;COND;PL;V     | 28.99 (169)       | 20.47 (513)    | 50.89             | 46.78         |
| 3;PFV;PL;PST;V  | 43.79 (354)       | 38.99 (513)    | 87.57             | 91.03         |
| 1;IMP;PL;POS;V  | 17.07 (82)        | 7.60 (513)     | 41.46             | 22.42         |
| NFIN;V          | 52.00 (475)       | 48.34 (513)    | 91.79             | 86.55         |
| 1;PST;SBJV;SG;V | 2.17 (92)         | 7.21 (513)     | 6.52              | 18.32         |
| 2;PRS;SG;V      | 23.74 (198)       | 15.98 (513)    | 43.94             | 30.41         |
| 1;COND;PL;V     | 12.50 (8)         | 3.70 (513)     | 12.50             | 17.93         |
| 3;PL;PST;SBJV;V | 0.00 (86)         | 0.00 (513)     | 0.00              | 0             |
| 3;IPFV;PL;PST;V | 53.75 (333)       | 45.61 (513)    | 92.79             | 96.49         |
| 1;FUT;SG;V      | 50.00 (72)        | 30.02 (513)    | 79.17             | 67.25         |
| ADJ;FEM;PL      | 67.79 (506)       | 67.32 (511)    | 97.63             | 97.06         |
| ADJ;MASC;PL     | 66.60 (515)       | 64.62 (537)    | 96.12             | 95.53         |
| ADJ;FEM;SG      | 60.87 (529)       | 60.53 (532)    | 94.33             | 94.36         |
| ADJ;MASC;SG     | 64.41 (531)       | 63.40 (541)    | 91.71             | 91.5          |

Table 75: The performance of [Artetxe et al. \(2017\)](#)’s model on translating words belonging to a specific morphological category for the Spanish–French language pair (the grey numbers correspond to the dictionary sizes).



| Morph           | Spanish–Italian   |               |                   |               |
|-----------------|-------------------|---------------|-------------------|---------------|
|                 | Normal (In vocab) | Normal (+OOV) | Lexeme (In vocab) | Lexeme (+OOV) |
| ALL             | 46.41 (10709)     | 26.87 (23528) | 75.92             | 50.38         |
| N;SG            | 58.65 (2319)      | 57.51 (2365)  | 92.02             | 91.5          |
| N;PL            | 49.09 (1805)      | 45.65 (2103)  | 85.87             | 83.45         |
| ADJ;MASC;SG     | 67.23 (476)       | 66.60 (482)   | 93.28             | 93.57         |
| ADJ;FEM;PL      | 69.44 (445)       | 69.04 (449)   | 96.18             | 95.99         |
| ADJ;MASC;PL     | 66.16 (461)       | 65.83 (477)   | 95.01             | 95.18         |
| ADJ;FEM;SG      | 68.94 (470)       | 68.94 (470)   | 95.11             | 95.11         |
| 2;IMP;PL;POS;V  | 3.17 (63)         | 1.06 (470)    | 12.7              | 5.32          |
| 1;PST;SBJV;SG;V | 58.89 (90)        | 39.82 (457)   | 84.44             | 69.37         |
| 1;FUT;PL;V      | 24.49 (49)        | 19.69 (457)   | 59.18             | 61.49         |
| 2;PFV;PST;SG;V  | 0.00 (19)         | 0.44 (457)    | 0                 | 0.88          |
| NFIN;V          | 55.56 (441)       | 52.75 (472)   | 95.92             | 93.43         |
| 3;PRS;SBJV;SG;V | 15.43 (324)       | 13.10 (458)   | 22.84             | 18.12         |
| 1;PL;PRS;SBJV;V | 33.75 (80)        | 21.23 (457)   | 77.5              | 66.74         |
| 2;FUT;SG;V      | 16.13 (31)        | 4.38 (457)    | 19.35             | 11.38         |
| 3;PFV;PST;SG;V  | 42.78 (367)       | 38.21 (458)   | 71.12             | 66.38         |
| 2;PL;PST;SBJV;V | 0.00 (1)          | 0.22 (457)    | 0                 | 0.66          |
| 3;IPFV;PST;SG;V | 54.90 (337)       | 47.16 (458)   | 88.72             | 81.88         |
| 2;IPFV;PL;PST;V | 0.00 (1)          | 1.75 (457)    | 0                 | 3.5           |
| 1;FUT;SG;V      | 32.84 (67)        | 22.32 (457)   | 62.69             | 54.27         |
| 3;COND;PL;V     | 0.85 (118)        | 1.09 (457)    | 3.39              | 3.72          |
| 1;IPFV;PL;PST;V | 33.33 (15)        | 28.67 (457)   | 93.33             | 91.68         |
| 3;PL;PRS;V      | 47.55 (368)       | 41.79 (457)   | 79.08             | 70.46         |
| 3;PST;SBJV;SG;V | 52.54 (177)       | 39.74 (458)   | 79.1              | 69.43         |
| 2;FUT;PL;V      | 16.67 (6)         | 3.72 (457)    | 16.67             | 13.57         |
| 1;COND;SG;V     | 1.91 (157)        | 2.41 (457)    | 4.46              | 6.56          |
| 2;PL;PRS;V      | 11.11 (27)        | 1.09 (457)    | 14.81             | 2.41          |
| 2;PST;SBJV;SG;V | 0.00 (4)          | 2.19 (457)    | 0                 | 4.16          |
| 1;COND;PL;V     | 25.00 (12)        | 20.35 (457)   | 66.67             | 70.02         |
| 3;PFV;PL;PST;V  | 56.23 (313)       | 50.55 (457)   | 93.61             | 95.4          |
| 1;PRS;SBJV;SG;V | 15.43 (324)       | 13.13 (457)   | 22.84             | 18.16         |
| 3;IMP;PL;POS;V  | 11.48 (244)       | 10.07 (457)   | 22.95             | 19.04         |
| 2;PRS;SG;V      | 11.76 (204)       | 6.78 (457)    | 22.55             | 11.38         |
| 2;PRS;SBJV;SG;V | 13.89 (180)       | 9.19 (457)    | 30                | 19.04         |
| 3;IMP;POS;SG;V  | 15.43 (324)       | 13.13 (457)   | 22.84             | 18.16         |
| 1;IMP;PL;POS;V  | 33.33 (81)        | 20.59 (471)   | 76.54             | 67.09         |
| 2;COND;PL;V     | 0.00 (1)          | 1.53 (457)    | 0                 | 5.69          |
| 2;IMP;POS;SG;V  | 45.72 (409)       | 41.40 (471)   | 67.48             | 60.51         |
| 2;COND;SG;V     | 0.00 (8)          | 0.22 (457)    | 0                 | 1.09          |
| 2;PL;PRS;SBJV;V | 0.00 (13)         | 0.22 (457)    | 0                 | 0.22          |
| 2;IPFV;PST;SG;V | 0.00 (16)         | 0.66 (457)    | 0                 | 1.09          |
| 3;COND;SG;V     | 2.14 (187)        | 2.40 (458)    | 3.74              | 6.55          |
| 3;IPFV;PL;PST;V | 55.26 (304)       | 48.80 (457)   | 95.72             | 96.5          |
| 2;PFV;PL;PST;V  | 0.00 (2)          | 1.97 (457)    | 0                 | 3.94          |
| 3;PL;PRS;SBJV;V | 11.48 (244)       | 10.07 (457)   | 22.95             | 19.04         |
| 1;PL;PRS;V      | 32.91 (158)       | 26.04 (457)   | 72.78             | 66.96         |
| 3;FUT;PL;V      | 46.21 (145)       | 35.23 (457)   | 87.59             | 91.9          |
| 3;FUT;SG;V      | 44.39 (223)       | 36.90 (458)   | 85.65             | 80.79         |
| 3;PRS;SG;V      | 45.69 (418)       | 43.23 (458)   | 68.42             | 63.1          |
| 1;PFV;PST;SG;V  | 0.00 (112)        | 2.84 (457)    | 2.68              | 5.03          |
| 1;PL;PST;SBJV;V | 0.00 (2)          | 5.03 (457)    | 0                 | 8.53          |
| 1;IPFV;PST;SG;V | 62.07 (145)       | 47.26 (457)   | 90.34             | 81.84         |
| 1;PFV;PL;PST;V  | 31.25 (48)        | 23.41 (457)   | 64.58             | 57.77         |
| 1;PRS;SG;V      | 28.87 (291)       | 22.54 (457)   | 44.33             | 33.7          |
| 3;PL;PST;SBJV;V | 53.78 (119)       | 43.54 (457)   | 91.6              | 93.44         |

Table 76: The performance of [Artetxe et al. \(2017\)](#)’s model on translating words belonging to a specific morphological category for the Spanish–Italian language pair (the grey numbers correspond to the dictionary sizes).

| Spanish–Portuguese |                   |               |                   |               |
|--------------------|-------------------|---------------|-------------------|---------------|
| Morph              | Normal (In vocab) | Normal (+OOV) | Lexeme (In vocab) | Lexeme (+OOV) |
| ALL                | 57.02 (9732)      | 35.10 (23197) | 81.27             | 54.98         |
| N;SG               | 63.79 (2066)      | 62.33 (2113)  | 89.79             | 89.21         |
| N;PL               | 62.06 (1692)      | 58.98 (1904)  | 92.26             | 92.59         |
| ADJ;FEM;PL         | 73.80 (439)       | 72.97 (444)   | 99.32             | 99.32         |
| ADJ;MASC;PL        | 72.54 (448)       | 70.88 (467)   | 97.54             | 97.86         |
| ADJ;FEM;SG         | 73.25 (456)       | 72.77 (459)   | 96.93             | 96.08         |
| ADJ;MASC;SG        | 71.90 (459)       | 70.85 (470)   | 95.42             | 94.68         |
| 1;PL;PRS;SBJV;V    | 16.98 (53)        | 22.58 (465)   | 35.85             | 35.91         |
| 3;PFV;PST;SG;V     | 57.26 (365)       | 49.89 (465)   | 82.47             | 74.84         |
| 3;PRS;SBJV;SG;V    | 40.65 (310)       | 34.48 (464)   | 51.61             | 43.97         |
| 3;FUT;PL;V         | 46.49 (114)       | 43.66 (465)   | 63.16             | 86.02         |
| 2;PL;PRS;V         | 6.67 (15)         | 0.22 (465)    | 6.67              | 0.43          |
| 3;COND;PL;V        | 60.45 (134)       | 45.38 (465)   | 80.60             | 82.15         |
| 1;IPFV;PL;PST;V    | 50.00 (8)         | 27.96 (465)   | 87.50             | 89.68         |
| 2;FUT;PL;SBJV;V    | -                 | 0.22 (465)    | -                 | 0.86          |
| 2;IMP;PL;POS;V     | 0.00 (36)         | 2.80 (465)    | 2.78              | 3.87          |
| 2;PRS;SBJV;SG;V    | 32.52 (123)       | 27.59 (464)   | 43.09             | 36.42         |
| 1;COND;SG;V        | 46.30 (216)       | 30.32 (465)   | 60.65             | 42.37         |
| 3;IMP;PL;POS;V     | 36.84 (228)       | 28.23 (464)   | 53.51             | 44.61         |
| 3;IMP;POS;SG;V     | 40.65 (310)       | 34.48 (464)   | 51.61             | 43.97         |
| 3;IPFV;PST;SG;V    | 58.24 (340)       | 51.40 (465)   | 80.59             | 81.29         |
| 2;PRS;SG;V         | 36.63 (172)       | 35.99 (464)   | 44.19             | 43.75         |
| 2;IPFV;PST;SG;V    | 22.22 (9)         | 12.90 (465)   | 44.44             | 18.49         |
| 1;COND;PL;V        | 63.64 (11)        | 46.02 (465)   | 72.73             | 86.24         |
| 1;FUT;PL;SBJV;V    | -                 | 4.95 (465)    | -                 | 11.4          |
| 3;FUT;PL;SBJV;V    | 28.57 (7)         | 6.45 (465)    | 28.57             | 11.4          |
| 2;FUT;PL;V         | 0.00 (2)          | 0.00 (465)    | 0.00              | 0             |
| 3;FUT;SBJV;SG;V    | 25.58 (43)        | 18.28 (465)   | 34.88             | 23.87         |
| NFIN;V             | 59.35 (433)       | 57.20 (465)   | 91.45             | 86.45         |
| 2;IPFV;PL;PST;V    | -                 | 0.22 (465)    | -                 | 0.43          |
| 2;PFV;PL;PST;V     | -                 | 0.65 (465)    | -                 | 0.65          |
| 2;FUT;SG;V         | 37.50 (16)        | 19.35 (465)   | 37.50             | 35.48         |
| 3;COND;SG;V        | 46.30 (216)       | 30.32 (465)   | 60.65             | 42.37         |
| 2;IMP;POS;SG;V     | 52.39 (418)       | 48.06 (464)   | 70.33             | 62.93         |
| 3;PFV;PL;PST;V     | 62.18 (312)       | 52.69 (465)   | 93.59             | 91.18         |
| 1;PFV;PL;PST;V     | 55.56 (81)        | 39.14 (465)   | 66.67             | 52.26         |
| 3;PL;PRS;V         | 59.57 (376)       | 51.08 (464)   | 83.51             | 75.65         |
| 1;PL;PRS;V         | 58.82 (153)       | 39.14 (465)   | 68.63             | 53.12         |
| 1;FUT;SG;V         | 49.21 (63)        | 45.59 (465)   | 60.32             | 77.42         |
| 3;PL;PRS;SBJV;V    | 36.84 (228)       | 28.23 (464)   | 53.51             | 44.61         |
| 3;PRS;SG;V         | 52.96 (423)       | 49.14 (464)   | 70.69             | 64.01         |
| 2;FUT;SBJV;SG;V    | 50.00 (4)         | 27.74 (465)   | 75.00             | 34.19         |
| 1;FUT;SBJV;SG;V    | 25.58 (43)        | 18.28 (465)   | 34.88             | 23.87         |
| 2;PFV;PST;SG;V     | 30.00 (30)        | 28.17 (465)   | 36.67             | 34.19         |
| 2;COND;SG;V        | 0.00 (4)          | 16.56 (465)   | 25.00             | 29.89         |
| 1;PRS;SBJV;SG;V    | 40.65 (310)       | 34.48 (464)   | 51.61             | 43.97         |
| 2;PL;PRS;SBJV;V    | 0.00 (3)          | 0.43 (465)    | 0.00              | 0.65          |
| 3;FUT;SG;V         | 60.21 (191)       | 53.98 (465)   | 82.20             | 91.4          |
| 1;IMP;PL;POS;V     | 16.98 (53)        | 22.58 (465)   | 35.85             | 35.91         |
| 1;IPFV;PST;SG;V    | 58.24 (340)       | 51.40 (465)   | 80.59             | 81.29         |
| 1;PRS;SG;V         | 40.14 (284)       | 36.93 (463)   | 51.41             | 47.95         |
| 2;COND;PL;V        | -                 | 0.00 (465)    | -                 | 0.22          |
| 1;PFV;PST;SG;V     | 30.07 (143)       | 12.90 (465)   | 49.65             | 20.43         |
| 3;IPFV;PL;PST;V    | 59.93 (307)       | 53.76 (465)   | 93.16             | 97.42         |
| 1;FUT;PL;V         | 42.11 (38)        | 45.59 (465)   | 52.63             | 85.59         |

Table 77: The performance of [Artetxe et al. \(2017\)](#)’s model on translating words belonging to a specific morphological category for the Spanish–Portuguese language pair (the grey numbers correspond to the dictionary sizes).

| Russian–Czech        |                   |               |                   |               |
|----------------------|-------------------|---------------|-------------------|---------------|
| Morph                | Normal (In vocab) | Normal (+OOV) | Lexeme (In vocab) | Lexeme (+OOV) |
| ALL                  | 32.08 (5708)      | 26.40 (7538)  | 76.77             | 73.11         |
| INS;N;PL             | 24.40 (373)       | 20.11 (537)   | 80.16             | 79.7          |
| DAT;N;SG             | 18.38 (457)       | 15.52 (554)   | 50.11             | 45.31         |
| ESS;N;PL             | 38.49 (304)       | 28.12 (537)   | 88.49             | 86.96         |
| ACC;N;SG             | 33.77 (533)       | 32.32 (557)   | 69.42             | 66.79         |
| N;NOM;PL             | 33.95 (489)       | 31.45 (531)   | 73.82             | 71.37         |
| DAT;N;PL             | 43.87 (269)       | 29.98 (537)   | 91.82             | 91.06         |
| ACC;N;PL             | 28.41 (271)       | 26.16 (302)   | 69.74             | 67.22         |
| GEN;N;SG             | 31.96 (535)       | 30.76 (556)   | 71.03             | 68.53         |
| INS;N;SG             | 32.99 (488)       | 29.08 (557)   | 79.51             | 76.3          |
| ESS;N;SG             | 22.53 (466)       | 18.67 (557)   | 53.86             | 46.32         |
| GEN;N;PL             | 33.41 (449)       | 28.81 (538)   | 74.83             | 68.77         |
| N;NOM;SG             | 33.64 (541)       | 33.03 (551)   | 70.06             | 67.88         |
| ACC;ADJ;INAN;MASC;SG | 44.55 (101)       | 42.86 (105)   | 94.06             | 94.29         |
| ADJ;GEN;PL           | 43.16 (95)        | 37.50 (112)   | 98.95             | 99.11         |
| ACC;ADJ;NEUT;SG      | 32.00 (100)       | 29.46 (112)   | 86                | 82.14         |
| ADJ;FEM;NOM;SG       | 47.37 (95)        | 42.86 (105)   | 96.84             | 97.14         |
| ADJ;DAT;FEM;SG       | 38.10 (105)       | 35.71 (112)   | 83.81             | 80.36         |
| ADJ;NEUT;NOM;SG      | 34.04 (94)        | 31.43 (105)   | 86.17             | 81.9          |
| ADJ;MASC;NOM;SG      | 44.55 (101)       | 42.86 (105)   | 94.06             | 94.29         |
| ADJ;DAT;PL           | 48.42 (95)        | 42.86 (112)   | 98.95             | 99.11         |
| ADJ;INS;PL           | 47.56 (82)        | 38.39 (112)   | 100               | 100           |
| ADJ;ESS;PL           | 43.16 (95)        | 37.50 (112)   | 98.95             | 99.11         |
| ACC;ADJ;FEM;SG       | 41.84 (98)        | 36.61 (112)   | 98.98             | 97.32         |
| ADJ;GEN;MASC;SG      | 45.10 (102)       | 41.96 (112)   | 100               | 100           |
| ADJ;GEN;NEUT;SG      | 45.10 (102)       | 41.96 (112)   | 100               | 100           |
| ADJ;ESS;NEUT;SG      | 50.00 (86)        | 42.86 (112)   | 95.35             | 94.64         |
| ADJ;INS;MASC;SG      | 48.42 (95)        | 42.86 (112)   | 98.95             | 99.11         |
| ADJ;DAT;MASC;SG      | 52.17 (69)        | 41.07 (112)   | 100               | 100           |
| ADJ;ESS;MASC;SG      | 50.00 (84)        | 42.86 (112)   | 96.43             | 94.64         |
| ACC;ADJ;MASC;SG      | 45.10 (102)       | 41.96 (112)   | 100               | 100           |
| ADJ;ESS;FEM;SG       | 38.10 (105)       | 35.71 (112)   | 83.81             | 80.36         |
| ADJ;DAT;NEUT;SG      | 52.17 (69)        | 41.07 (112)   | 100               | 100           |
| ADJ;FEM;GEN;SG       | 38.10 (105)       | 35.71 (112)   | 83.81             | 80.36         |
| 3;MASC;PL;PST;V      | 28.17 (71)        | 23.16 (95)    | 91.55             | 90.53         |
| 2;PL;PRS;V           | 20.00 (15)        | 11.86 (59)    | 93.33             | 86.44         |
| 1;PL;PRS;V           | 26.67 (15)        | 11.86 (59)    | 73.33             | 55.93         |
| 3;FEM;PST;SG;V       | 31.88 (69)        | 25.26 (95)    | 94.2              | 84.21         |
| 2;IMP;SG;V           | 6.25 (16)         | 3.19 (94)     | 25                | 17.02         |
| 3;FEM;PL;PST;V       | 27.69 (65)        | 23.16 (95)    | 87.69             | 90.53         |
| 3;NEUT;PST;SG;V      | 26.67 (45)        | 18.95 (95)    | 82.22             | 80            |
| 2;PRS;SG;V           | 42.86 (7)         | 15.25 (59)    | 57.14             | 57.63         |
| 2;IMP;PL;V           | 23.53 (17)        | 11.70 (94)    | 58.82             | 63.83         |
| 1;PRS;SG;V           | 28.57 (21)        | 13.56 (59)    | 71.43             | 37.29         |
| 3;PL;PRS;V           | 18.60 (43)        | 13.56 (59)    | 74.42             | 64.41         |
| NFIN;V               | 26.50 (117)       | 24.80 (125)   | 100               | 97.6          |
| 3;MASC;PST;SG;V      | 27.71 (83)        | 24.73 (93)    | 85.54             | 79.57         |
| 3;PRS;SG;V           | 20.37 (54)        | 18.64 (59)    | 79.63             | 74.58         |
| 2;FUT;PL;V           | 0.00 (4)          | 5.41 (37)     | 75                | 62.16         |
| 2;FUT;SG;V           | 0.00 (1)          | 10.81 (37)    | 100               | 45.95         |
| 1;FUT;PL;V           | 20.00 (5)         | 2.70 (37)     | 80                | 21.62         |
| 1;FUT;SG;V           | 14.29 (7)         | 2.70 (37)     | 42.86             | 21.62         |
| 3;FUT;SG;V           | 14.29 (28)        | 10.81 (37)    | 42.86             | 40.54         |
| 3;FUT;PL;V           | 4.55 (22)         | 2.70 (37)     | 36.36             | 32.43         |
| ACC;INAN;N;SG        | 0.00 (1)          | 50.00 (2)     | 0                 | 50            |
| ACC;INAN;N;PL        | 0.00 (1)          | 50.00 (2)     | 100               | 100           |
| ADJ;INS;NEUT;SG      | 22.22 (9)         | 16.67 (12)    | 100               | 100           |
| ADJ;FEM;INS;SG       | 36.36 (11)        | 33.33 (12)    | 100               | 100           |
| ACC;ADJ;PL           | 27.27 (11)        | 25.00 (12)    | 100               | 100           |
| ADJ;NOM;PL           | 20.00 (10)        | 16.67 (12)    | 90                | 83.33         |
| 2;FEM;PL;PST;V       | 0.00 (1)          | 0.00 (1)      | 0                 | 0             |
| 2;MASC;PL;PST;V      | 0.00 (1)          | 0.00 (1)      | 0                 | 0             |

Table 78: The performance of [Artetxe et al. \(2017\)](#)’s model on translating words belonging to a specific morphological category for the Russian–Czech language pair (the grey numbers correspond to the dictionary sizes).

| Russian–Polish       |                   |               |                   |               |
|----------------------|-------------------|---------------|-------------------|---------------|
| Morph                | Normal (In vocab) | Normal (+OOV) | Lexeme (In vocab) | Lexeme (+OOV) |
| ALL                  | 39.99 (9183)      | 35.02 (11697) | 81.19             | 78.64         |
| DAT;N;SG             | 28.02 (653)       | 24.62 (999)   | 60.03             | 57.16         |
| INS;N;SG             | 38.79 (879)       | 34.80 (1000)  | 82.03             | 79.3          |
| ACC;N;SG             | 37.78 (953)       | 35.60 (1000)  | 71.46             | 68.6          |
| GEN;N;SG             | 40.94 (960)       | 39.30 (1000)  | 79.79             | 77.6          |
| ESS;N;SG             | 32.10 (782)       | 28.36 (998)   | 62.28             | 55.71         |
| N;NOM;SG             | 35.86 (976)       | 34.94 (993)   | 69.06             | 66.77         |
| INS;N;PL             | 45.11 (634)       | 35.81 (930)   | 98.58             | 98.71         |
| GEN;N;PL             | 40.12 (805)       | 35.56 (928)   | 75.40             | 69.94         |
| DAT;N;PL             | 42.46 (358)       | 31.72 (930)   | 83.24             | 85.27         |
| ESS;N;PL             | 47.13 (541)       | 36.56 (930)   | 91.87             | 89.03         |
| ACC;N;PL             | 37.13 (579)       | 34.60 (633)   | 77.89             | 74.09         |
| N;NOM;PL             | 40.44 (863)       | 38.14 (923)   | 81.92             | 79.41         |
| ACC;ADJ;INAN;MASC;SG | 49.18 (183)       | 48.42 (190)   | 93.44             | 93.68         |
| ADJ;GEN;PL           | 51.67 (180)       | 49.47 (190)   | 97.78             | 97.89         |
| ADJ;DAT;PL           | 43.33 (180)       | 42.11 (190)   | 94.44             | 94.74         |
| ADJ;FEM;GEN;SG       | 46.67 (180)       | 45.26 (190)   | 94.44             | 94.21         |
| ADJ;ESS;NEUT;SG      | 40.72 (167)       | 37.89 (190)   | 88.62             | 88.42         |
| ACC;ADJ;NEUT;SG      | 41.34 (179)       | 40.00 (190)   | 88.83             | 88.95         |
| ADJ;DAT;MASC;SG      | 51.33 (113)       | 44.21 (190)   | 98.23             | 98.95         |
| ADJ;INS;NEUT;SG      | 43.33 (180)       | 42.11 (190)   | 94.44             | 94.74         |
| ACC;ADJ;MASC;SG      | 45.11 (184)       | 44.21 (190)   | 95.65             | 95.79         |
| ADJ;GEN;MASC;SG      | 45.11 (184)       | 44.21 (190)   | 95.65             | 95.79         |
| ADJ;GEN;NEUT;SG      | 45.11 (184)       | 44.21 (190)   | 95.65             | 95.79         |
| ADJ;ESS;FEM;SG       | 46.67 (180)       | 45.26 (190)   | 94.44             | 94.21         |
| ADJ;NEUT;NOM;SG      | 41.34 (179)       | 40.00 (190)   | 88.83             | 88.95         |
| ADJ;INS;MASC;SG      | 43.33 (180)       | 42.11 (190)   | 94.44             | 94.74         |
| ADJ;FEM;NOM;SG       | 42.62 (183)       | 41.58 (190)   | 95.63             | 95.79         |
| ADJ;MASC;NOM;SG      | 49.18 (183)       | 48.42 (190)   | 93.44             | 93.68         |
| ADJ;DAT;FEM;SG       | 46.67 (180)       | 45.26 (190)   | 94.44             | 94.21         |
| ADJ;ESS;PL           | 51.67 (180)       | 49.47 (190)   | 97.78             | 97.89         |
| ACC;ADJ;FEM;SG       | 46.75 (169)       | 42.63 (190)   | 99.41             | 98.95         |
| ADJ;FEM;INS;SG       | 47.46 (177)       | 45.26 (190)   | 93.79             | 94.21         |
| ADJ;INS;PL           | 49.39 (164)       | 44.74 (190)   | 100.00            | 100           |
| ADJ;ESS;MASC;SG      | 40.72 (167)       | 37.89 (190)   | 88.62             | 88.42         |
| ADJ;DAT;NEUT;SG      | 51.33 (113)       | 44.21 (190)   | 98.23             | 98.95         |
| ADJ;NOM;PL           | 44.57 (184)       | 43.68 (190)   | 89.13             | 88.42         |
| ACC;ADJ;PL           | 50.82 (183)       | 49.47 (190)   | 96.17             | 97.89         |
| NFIN;V               | 36.67 (30)        | 33.33 (33)    | 96.67             | 96.97         |
| 2;MASC;PL;PST;V      | -                 | 21.21 (33)    | -                 | 84.85         |
| 3;MASC;PST;SG;V      | 33.33 (21)        | 24.24 (33)    | 85.71             | 84.85         |
| 2;PRS;SG;V           | 25.00 (4)         | 4.00 (25)     | 75.00             | 24            |
| 2;IMP;SG;V           | 0.00 (10)         | 3.03 (33)     | 40.00             | 18.18         |
| 1;FEM;PST;SG;V       | 20.00 (5)         | 24.24 (33)    | 100.00            | 93.94         |
| 3;MASC;PL;PST;V      | 30.00 (20)        | 21.21 (33)    | 80.00             | 84.85         |
| 2;PL;PRS;V           | 0.00 (1)          | 0.00 (25)     | 0.00              | 0             |
| 2;MASC;PST;SG;V      | 25.00 (4)         | 24.24 (33)    | 50.00             | 84.85         |
| 1;PL;PRS;V           | 22.22 (9)         | 12.00 (25)    | 88.89             | 28            |
| 3;NEUT;PST;SG;V      | 38.46 (13)        | 24.24 (33)    | 76.92             | 81.82         |
| 3;FEM;PST;SG;V       | 33.33 (21)        | 24.24 (33)    | 90.48             | 93.94         |
| 2;IMP;PL;V           | 0.00 (4)          | 0.00 (33)     | 50.00             | 21.21         |
| 3;PL;PRS;V           | 38.89 (18)        | 28.00 (25)    | 83.33             | 76            |
| 2;FEM;PST;SG;V       | -                 | 24.24 (33)    | -                 | 93.94         |
| 1;FEM;PL;PST;V       | -                 | 21.21 (33)    | -                 | 84.85         |
| 2;FEM;PL;PST;V       | -                 | 21.21 (33)    | -                 | 84.85         |
| 1;MASC;PST;SG;V      | 28.57 (14)        | 24.24 (33)    | 78.57             | 84.85         |
| 3;PRS;SG;V           | 20.83 (24)        | 20.00 (25)    | 66.67             | 60            |
| 1;MASC;PL;PST;V      | 20.00 (5)         | 21.21 (33)    | 100.00            | 84.85         |
| 3;FEM;PL;PST;V       | 27.78 (18)        | 21.21 (33)    | 77.78             | 84.85         |
| 1;PRS;SG;V           | 44.44 (9)         | 16.00 (25)    | 55.56             | 28            |
| 1;FUT;SG;V           | 0.00 (2)          | 0.00 (8)      | 0.00              | 0             |
| 3;FUT;SG;V           | 0.00 (7)          | 0.00 (8)      | 42.86             | 37.5          |
| 2;FUT;SG;V           | -                 | 25.00 (8)     | -                 | 62.5          |
| 3;FUT;PL;V           | 0.00 (6)          | 0.00 (8)      | 50.00             | 37.5          |
| 1;FUT;PL;V           | -                 | 0.00 (8)      | -                 | 12.5          |
| 2;FUT;PL;V           | 0.00 (2)          | 0.00 (8)      | 0.00              | 25            |

Table 79: The performance of Artetxe et al. (2017)’s model on translating words belonging to a specific morphological category for the Russian–Polish language pair (the grey numbers correspond to the dictionary sizes).

| Russian–Slovak       |                   |               |                   |               |
|----------------------|-------------------|---------------|-------------------|---------------|
| Morph                | Normal (In vocab) | Normal (+OOV) | Lexeme (In vocab) | Lexeme (+OOV) |
| ALL                  | 24.04 (1610)      | 19.95 (2150)  | 78.32             | 74.74         |
| ACC;N;PL             | 14.29 (91)        | 11.93 (109)   | 74.73             | 68.81         |
| ESS;N;PL             | 41.98 (81)        | 24.87 (189)   | 98.77             | 93.12         |
| INS;N;SG             | 23.53 (153)       | 18.13 (193)   | 86.93             | 80.83         |
| INS;N;PL             | 31.43 (105)       | 23.81 (189)   | 99.05             | 99.47         |
| N;NOM;SG             | 23.12 (186)       | 22.63 (190)   | 73.12             | 70            |
| GEN;N;PL             | 18.79 (149)       | 14.81 (189)   | 68.46             | 61.38         |
| ACC;N;SG             | 19.77 (177)       | 18.13 (193)   | 71.19             | 69.43         |
| ESS;N;SG             | 18.25 (137)       | 13.99 (193)   | 56.93             | 45.6          |
| GEN;N;SG             | 22.03 (177)       | 20.21 (193)   | 71.19             | 67.88         |
| DAT;N;SG             | 21.97 (132)       | 17.62 (193)   | 66.67             | 58.55         |
| DAT;N;PL             | 27.37 (95)        | 18.09 (188)   | 65.26             | 67.55         |
| N;NOM;PL             | 20.12 (164)       | 18.28 (186)   | 77.44             | 73.12         |
| 3;MASC;PST;SG;V      | -                 | 0.00 (2)      | -                 | 0             |
| 2;IMP;PL;V           | -                 | 0.00 (2)      | -                 | 0             |
| 2;PRS;SG;V           | -                 | 0.00 (2)      | -                 | 0             |
| 1;PL;PRS;V           | -                 | 50.00 (2)     | -                 | 100           |
| 3;FEM;PST;SG;V       | -                 | 0.00 (2)      | -                 | 0             |
| 2;IMP;SG;V           | -                 | 0.00 (2)      | -                 | 0             |
| NFIN;V               | 25.00 (40)        | 18.75 (48)    | 100.00            | 100           |
| 1;PRS;SG;V           | 0.00 (1)          | 0.00 (2)      | 100.00            | 50            |
| 3;PL;PRS;V           | 0.00 (2)          | 0.00 (2)      | 50.00             | 50            |
| 2;PL;PRS;V           | -                 | 0.00 (2)      | -                 | 50            |
| 3;NEUT;PST;SG;V      | -                 | 0.00 (2)      | -                 | 0             |
| 3;FEM;PL;PST;V       | -                 | 0.00 (2)      | -                 | 0             |
| 3;PRS;SG;V           | 0.00 (2)          | 0.00 (2)      | 50.00             | 50            |
| 3;MASC;PL;PST;V      | -                 | 0.00 (2)      | -                 | 0             |
| ADJ;FEM;GEN;SG       | 26.09 (23)        | 25.00 (24)    | 95.65             | 100           |
| ADJ;ESS;NEUT;SG      | 33.33 (21)        | 37.50 (24)    | 80.95             | 79.17         |
| ADJ;DAT;FEM;SG       | 26.09 (23)        | 25.00 (24)    | 95.65             | 100           |
| ADJ;GEN;PL           | 33.33 (24)        | 33.33 (24)    | 95.83             | 95.83         |
| ADJ;NOM;PL           | 26.09 (23)        | 25.00 (24)    | 82.61             | 83.33         |
| ADJ;FEM;NOM;SG       | 26.09 (23)        | 29.17 (24)    | 100.00            | 100           |
| ACC;ADJ;PL           | 34.78 (23)        | 33.33 (24)    | 95.65             | 95.83         |
| ADJ;NEUT;NOM;SG      | 17.39 (23)        | 16.67 (24)    | 69.57             | 70.83         |
| ADJ;INS;NEUT;SG      | 33.33 (24)        | 33.33 (24)    | 100.00            | 100           |
| ADJ;INS;MASC;SG      | 33.33 (24)        | 33.33 (24)    | 100.00            | 100           |
| ADJ;FEM;INS;SG       | 28.57 (21)        | 25.00 (24)    | 100.00            | 100           |
| ADJ;ESS;FEM;SG       | 26.09 (23)        | 25.00 (24)    | 95.65             | 100           |
| ACC;ADJ;INAN;MASC;SG | 45.83 (24)        | 45.83 (24)    | 87.50             | 87.5          |
| ACC;ADJ;FEM;SG       | 13.04 (23)        | 12.50 (24)    | 95.65             | 95.83         |
| ADJ;ESS;PL           | 33.33 (24)        | 33.33 (24)    | 95.83             | 95.83         |
| ADJ;GEN;MASC;SG      | 33.33 (24)        | 33.33 (24)    | 95.83             | 95.83         |
| ACC;ADJ;MASC;SG      | 33.33 (24)        | 33.33 (24)    | 95.83             | 95.83         |
| ADJ;GEN;NEUT;SG      | 33.33 (24)        | 33.33 (24)    | 95.83             | 95.83         |
| ADJ;ESS;MASC;SG      | 33.33 (21)        | 37.50 (24)    | 80.95             | 79.17         |
| ADJ;DAT;PL           | 33.33 (24)        | 33.33 (24)    | 100.00            | 100           |
| ADJ;DAT;NEUT;SG      | 23.81 (21)        | 16.67 (24)    | 100.00            | 100           |
| ACC;ADJ;NEUT;SG      | 17.39 (23)        | 16.67 (24)    | 69.57             | 70.83         |
| ADJ;MASC;NOM;SG      | 45.83 (24)        | 45.83 (24)    | 87.50             | 87.5          |
| ADJ;DAT;MASC;SG      | 23.81 (21)        | 16.67 (24)    | 100.00            | 100           |
| ADJ;INS;PL           | 40.91 (22)        | 45.83 (24)    | 100.00            | 100           |

Table 80: The performance of Artetxe et al. (2017)’s model on translating words belonging to a specific morphological category for the Russian–Slovak language pair (the grey numbers correspond to the dictionary sizes).

| Russian–Ukrainian    |                   |               |                   |               |
|----------------------|-------------------|---------------|-------------------|---------------|
| Morph                | Normal (In vocab) | Normal (+OOV) | Lexeme (In vocab) | Lexeme (+OOV) |
| ALL                  | 48.58 (1165)      | 44.41 (1396)  | 82.83             | 81.88         |
| N;NOM;SG             | 48.63 (146)       | 48.30 (147)   | 83.56             | 82.99         |
| N;NOM;PL             | 48.20 (139)       | 48.20 (139)   | 81.29             | 81.29         |
| GEN;N;SG             | 50.34 (145)       | 50.00 (146)   | 82.76             | 82.19         |
| GEN;N;PL             | 41.98 (131)       | 40.00 (140)   | 77.86             | 75.71         |
| ESS;N;PL             | 62.65 (83)        | 51.08 (139)   | 92.77             | 93.53         |
| DAT;N;PL             | 61.43 (70)        | 49.64 (139)   | 97.14             | 97.12         |
| ACC;N;PL             | 25.42 (59)        | 24.59 (61)    | 72.88             | 72.13         |
| DAT;N;SG             | 38.40 (125)       | 31.29 (147)   | 60.00             | 49.66         |
| ESS;N;SG             | 39.84 (128)       | 34.69 (147)   | 60.16             | 55.1          |
| ACC;N;SG             | 47.22 (144)       | 46.26 (147)   | 79.86             | 78.91         |
| INS;N;SG             | 51.47 (136)       | 47.62 (147)   | 91.18             | 88.44         |
| INS;N;PL             | 58.59 (99)        | 48.20 (139)   | 100.00            | 99.28         |
| ADJ;ESS;PL           | 33.33 (3)         | 33.33 (3)     | 100.00            | 100           |
| ACC;ADJ;INAN;MASC;SG | 33.33 (3)         | 33.33 (3)     | 100.00            | 100           |
| ADJ;DAT;PL           | 33.33 (3)         | 33.33 (3)     | 100.00            | 100           |
| ACC;ADJ;PL           | 33.33 (3)         | 33.33 (3)     | 100.00            | 100           |
| ADJ;DAT;NEUT;SG      | -                 | 0.00 (3)      | -                 | 100           |
| ADJ;NOM;PL           | 33.33 (3)         | 33.33 (3)     | 100.00            | 100           |
| ACC;ADJ;FEM;SG       | 33.33 (3)         | 33.33 (3)     | 100.00            | 100           |
| ADJ;DAT;MASC;SG      | -                 | 0.00 (3)      | -                 | 100           |
| ADJ;FEM;INS;SG       | 33.33 (3)         | 33.33 (3)     | 100.00            | 100           |
| ADJ;INS;NEUT;SG      | 33.33 (3)         | 33.33 (3)     | 100.00            | 100           |
| ADJ;GEN;PL           | 33.33 (3)         | 33.33 (3)     | 100.00            | 100           |
| ADJ;DAT;FEM;SG       | -                 | 33.33 (3)     | -                 | 100           |
| ADJ;ESS;NEUT;SG      | -                 | 33.33 (3)     | -                 | 100           |
| ADJ;ESS;FEM;SG       | -                 | 33.33 (3)     | -                 | 100           |
| ACC;ADJ;INAN;PL      | 33.33 (3)         | 33.33 (3)     | 100.00            | 100           |
| ADJ;GEN;MASC;SG      | 33.33 (3)         | 33.33 (3)     | 100.00            | 100           |
| ADJ;GEN;NEUT;SG      | 33.33 (3)         | 33.33 (3)     | 100.00            | 100           |
| ACC;ADJ;NEUT;SG      | 33.33 (3)         | 33.33 (3)     | 100.00            | 100           |
| ADJ;INS;PL           | 33.33 (3)         | 33.33 (3)     | 100.00            | 100           |
| ADJ;FEM;NOM;SG       | 33.33 (3)         | 33.33 (3)     | 100.00            | 100           |
| ADJ;ESS;MASC;SG      | -                 | 33.33 (3)     | -                 | 100           |
| ADJ;MASC;NOM;SG      | 33.33 (3)         | 33.33 (3)     | 100.00            | 100           |
| ADJ;NEUT;NOM;SG      | 33.33 (3)         | 33.33 (3)     | 100.00            | 100           |
| ADJ;FEM;GEN;SG       | 33.33 (3)         | 33.33 (3)     | 100.00            | 100           |
| ADJ;INS;MASC;SG      | 33.33 (3)         | 33.33 (3)     | 100.00            | 100           |
| ACC;ADJ;MASC;SG      | 33.33 (3)         | 33.33 (3)     | 100.00            | 100           |
| 3;PRS;SG;V           | 66.67 (3)         | 66.67 (3)     | 100.00            | 100           |
| 2;IMP;SG;V           | 66.67 (3)         | 66.67 (3)     | 66.67             | 66.67         |
| 3;NEUT;PST;SG;V      | 100.00 (3)        | 100.00 (3)    | 100.00            | 100           |
| 2;MASC;PL;PST;V      | 66.67 (3)         | 66.67 (3)     | 100.00            | 100           |
| 3;MASC;PST;SG;V      | 66.67 (3)         | 66.67 (3)     | 100.00            | 100           |
| 2;PL;PRS;V           | 50.00 (2)         | 33.33 (3)     | 100.00            | 100           |
| 3;MASC;PL;PST;V      | 66.67 (3)         | 66.67 (3)     | 100.00            | 100           |
| 1;MASC;PL;PST;V      | 66.67 (3)         | 66.67 (3)     | 100.00            | 100           |
| 3;PL;PRS;V           | 66.67 (3)         | 66.67 (3)     | 100.00            | 100           |
| 2;IMP;PL;V           | 0.00 (3)          | 0.00 (3)      | 66.67             | 66.67         |
| 2;FEM;PST;SG;V       | 66.67 (3)         | 66.67 (3)     | 100.00            | 100           |
| 1;PRS;SG;V           | 33.33 (3)         | 33.33 (3)     | 66.67             | 66.67         |
| 1;FEM;PST;SG;V       | 66.67 (3)         | 66.67 (3)     | 100.00            | 100           |
| 1;PL;PRS;V           | 33.33 (3)         | 33.33 (3)     | 100.00            | 100           |
| 2;FEM;PL;PST;V       | 66.67 (3)         | 66.67 (3)     | 100.00            | 100           |
| 2;MASC;PST;SG;V      | 66.67 (3)         | 66.67 (3)     | 100.00            | 100           |
| 3;FEM;PL;PST;V       | 66.67 (3)         | 66.67 (3)     | 100.00            | 100           |
| 1;MASC;PST;SG;V      | 66.67 (3)         | 66.67 (3)     | 100.00            | 100           |
| 2;PRS;SG;V           | 100.00 (2)        | 66.67 (3)     | 100.00            | 100           |
| NFIN;V               | 66.67 (3)         | 66.67 (3)     | 100.00            | 100           |
| 3;FEM;PST;SG;V       | 66.67 (3)         | 66.67 (3)     | 100.00            | 100           |
| 1;FEM;PL;PST;V       | 66.67 (3)         | 66.67 (3)     | 100.00            | 100           |

Table 81: The performance of [Artetxe et al. \(2017\)](#)’s model on translating words belonging to a specific morphological category for the Russian–Ukrainian language pair (the grey numbers correspond to the dictionary sizes).



| Slovak–Czech         |                   |               |                   |               |
|----------------------|-------------------|---------------|-------------------|---------------|
| Morph                | Normal (In vocab) | Normal (+OOV) | Lexeme (In vocab) | Lexeme (+OOV) |
| ALL                  | 58.74 (858)       | 49.57 (1154)  | 91.61             | 89.6          |
| GEN;N;SG             | 69.33 (75)        | 68.42 (76)    | 89.33             | 88.16         |
| DAT;N;PL             | 73.81 (42)        | 56.41 (78)    | 97.62             | 93.59         |
| ESS;N;SG             | 58.49 (53)        | 46.05 (76)    | 77.36             | 65.79         |
| N;NOM;PL             | 62.69 (67)        | 56.41 (78)    | 80.60             | 76.92         |
| ACC;N;SG             | 72.22 (72)        | 69.74 (76)    | 86.11             | 86.84         |
| INS;N;SG             | 62.90 (62)        | 56.58 (76)    | 91.94             | 92.11         |
| N;NOM;SG             | 69.74 (76)        | 69.74 (76)    | 86.84             | 85.53         |
| ACC;N;PL             | 66.18 (68)        | 60.26 (78)    | 82.35             | 79.49         |
| INS;N;PL             | 38.46 (52)        | 29.49 (78)    | 84.62             | 79.49         |
| ESS;N;PL             | 79.49 (39)        | 56.41 (78)    | 100.00            | 94.87         |
| DAT;N;SG             | 67.92 (53)        | 55.26 (76)    | 86.79             | 73.68         |
| GEN;N;PL             | 61.29 (62)        | 54.55 (77)    | 85.48             | 80.52         |
| NFIN;V               | 22.16 (185)       | 15.03 (286)   | 99.46             | 99.65         |
| ADJ;NEUT;NOM;SG      | 86.67 (15)        | 86.67 (15)    | 93.33             | 93.33         |
| ADJ;FEM;NOM;SG       | 86.67 (15)        | 86.67 (15)    | 100.00            | 100           |
| ADJ;ESS;PL           | 86.67 (15)        | 86.67 (15)    | 100.00            | 100           |
| ACC;ADJ;MASC;SG      | 80.00 (15)        | 80.00 (15)    | 100.00            | 100           |
| ACC;ADJ;INAN;MASC;SG | 93.33 (15)        | 93.33 (15)    | 100.00            | 100           |
| ADJ;FEM;GEN;SG       | 71.43 (14)        | 73.33 (15)    | 92.86             | 93.33         |
| ADJ;GEN;NEUT;SG      | 80.00 (15)        | 80.00 (15)    | 100.00            | 100           |
| ADJ;DAT;MASC;SG      | 90.91 (11)        | 80.00 (15)    | 100.00            | 100           |
| ADJ;DAT;NEUT;SG      | 90.91 (11)        | 80.00 (15)    | 100.00            | 100           |
| ADJ;MASC;NOM;SG      | 93.33 (15)        | 93.33 (15)    | 100.00            | 100           |
| ACC;ADJ;FEM;SG       | 85.71 (14)        | 86.67 (15)    | 100.00            | 100           |
| ADJ;GEN;MASC;SG      | 80.00 (15)        | 80.00 (15)    | 100.00            | 100           |
| ADJ;DAT;PL           | 84.62 (13)        | 86.67 (15)    | 100.00            | 100           |
| ADJ;INS;PL           | 84.62 (13)        | 80.00 (15)    | 100.00            | 100           |
| ACC;ADJ;NEUT;SG      | 86.67 (15)        | 86.67 (15)    | 93.33             | 93.33         |
| ADJ;GEN;PL           | 86.67 (15)        | 86.67 (15)    | 100.00            | 100           |
| ACC;ADJ;MASC;PL      | 86.67 (15)        | 86.67 (15)    | 100.00            | 100           |
| ADJ;ESS;MASC;SG      | 83.33 (12)        | 80.00 (15)    | 100.00            | 100           |
| ADJ;ESS;FEM;SG       | 71.43 (14)        | 73.33 (15)    | 92.86             | 93.33         |
| ADJ;INS;MASC;SG      | 84.62 (13)        | 86.67 (15)    | 100.00            | 100           |
| ADJ;DAT;FEM;SG       | 71.43 (14)        | 73.33 (15)    | 92.86             | 93.33         |
| ADJ;ESS;NEUT;SG      | 83.33 (12)        | 80.00 (15)    | 100.00            | 100           |
| ADJ;MASC;NOM;PL      | 83.33 (6)         | 53.33 (15)    | 100.00            | 80            |
| 3;MASC;PST;SG;V      | 100.00 (1)        | 100.00 (2)    | 100.00            | 100           |
| 2;IMP;SG;V           | 100.00 (1)        | 100.00 (2)    | 100.00            | 100           |
| 3;PL;PRS;V           | 100.00 (2)        | 100.00 (2)    | 100.00            | 100           |
| 3;NEUT;PST;SG;V      | 100.00 (1)        | 100.00 (2)    | 100.00            | 100           |
| 1;PL;PRS;V           | 100.00 (1)        | 100.00 (2)    | 100.00            | 100           |
| 2;PL;PRS;V           | 0.00 (1)          | 50.00 (2)     | 0.00              | 50            |
| 1;IMP;PL;V           | -                 | 100.00 (2)    | -                 | 100           |
| 3;FEM;PL;PST;V       | 100.00 (1)        | 100.00 (2)    | 100.00            | 100           |
| 3;FEM;PST;SG;V       | 100.00 (1)        | 100.00 (2)    | 100.00            | 100           |
| 2;IMP;PL;V           | -                 | 100.00 (2)    | -                 | 100           |
| 3;PRS;SG;V           | 100.00 (2)        | 100.00 (2)    | 100.00            | 100           |
| 2;PRS;SG;V           | 100.00 (1)        | 100.00 (2)    | 100.00            | 100           |
| 3;MASC;PL;PST;V      | 100.00 (1)        | 100.00 (2)    | 100.00            | 100           |
| 1;PRS;SG;V           | 0.00 (1)          | 50.00 (2)     | 0.00              | 50            |
| 3;NEUT;PL;PST;V      | 100.00 (1)        | 100.00 (2)    | 100.00            | 100           |

Table 82: The performance of [Artetxe et al. \(2017\)](#)’s model on translating words belonging to a specific morphological category for the Slovak–Czech language pair (the grey numbers correspond to the dictionary sizes).

| Slovak–Polish        |                   |               |                   |               |
|----------------------|-------------------|---------------|-------------------|---------------|
| Morph                | Normal (In vocab) | Normal (+OOV) | Lexeme (In vocab) | Lexeme (+OOV) |
| ALL                  | 38.31 (830)       | 30.80 (1094)  | 80.48             | 79.16         |
| ESS;N;SG             | 32.89 (76)        | 25.96 (104)   | 61.84             | 58.65         |
| GEN;N;PL             | 39.76 (83)        | 32.35 (102)   | 75.90             | 67.65         |
| N;NOM;SG             | 33.98 (103)       | 33.65 (104)   | 65.05             | 63.46         |
| INS;N;PL             | 31.67 (60)        | 18.63 (102)   | 98.33             | 98.04         |
| ACC;N;PL             | 40.82 (98)        | 38.24 (102)   | 78.57             | 76.47         |
| ACC;N;SG             | 35.00 (100)       | 33.65 (104)   | 68.00             | 68.27         |
| DAT;N;SG             | 27.94 (68)        | 20.19 (104)   | 66.18             | 54.81         |
| GEN;N;SG             | 40.82 (98)        | 37.50 (104)   | 77.55             | 74.04         |
| ESS;N;PL             | 57.69 (52)        | 35.29 (102)   | 98.08             | 96.08         |
| DAT;N;PL             | 48.98 (49)        | 27.45 (102)   | 85.71             | 83.33         |
| N;NOM;PL             | 40.82 (98)        | 37.25 (102)   | 78.57             | 76.47         |
| INS;N;SG             | 35.44 (79)        | 27.88 (104)   | 83.54             | 86.54         |
| NFIN;V               | 20.00 (35)        | 17.39 (46)    | 97.14             | 95.65         |
| ADJ;DAT;NEUT;SG      | 50.00 (8)         | 50.00 (12)    | 100.00            | 100           |
| ADJ;DAT;PL           | 33.33 (12)        | 33.33 (12)    | 100.00            | 100           |
| ADJ;NOM;PL           | 54.55 (11)        | 50.00 (12)    | 90.91             | 91.67         |
| ACC;ADJ;MASC;SG      | 50.00 (12)        | 50.00 (12)    | 100.00            | 100           |
| ADJ;ESS;PL           | 58.33 (12)        | 58.33 (12)    | 100.00            | 100           |
| ADJ;ESS;NEUT;SG      | 0.00 (10)         | 8.33 (12)     | 80.00             | 83.33         |
| ADJ;FEM;INS;SG       | 0.00 (11)         | 0.00 (12)     | 81.82             | 83.33         |
| ACC;ADJ;PL           | 54.55 (11)        | 50.00 (12)    | 90.91             | 91.67         |
| ADJ;MASC;NOM;SG      | 66.67 (12)        | 66.67 (12)    | 91.67             | 91.67         |
| ADJ;DAT;MASC;SG      | 50.00 (8)         | 50.00 (12)    | 100.00            | 100           |
| ACC;ADJ;FEM;SG       | 36.36 (11)        | 41.67 (12)    | 100.00            | 100           |
| ADJ;FEM;GEN;SG       | 81.82 (11)        | 75.00 (12)    | 100.00            | 100           |
| ADJ;FEM;NOM;SG       | 72.73 (11)        | 66.67 (12)    | 90.91             | 91.67         |
| ACC;ADJ;NEUT;SG      | 54.55 (11)        | 50.00 (12)    | 90.91             | 91.67         |
| ADJ;MASC;NOM;PL      | 25.00 (8)         | 16.67 (12)    | 100.00            | 91.67         |
| ADJ;ESS;FEM;SG       | 81.82 (11)        | 75.00 (12)    | 100.00            | 100           |
| ADJ;INS;PL           | 55.56 (9)         | 58.33 (12)    | 100.00            | 100           |
| ADJ;INS;MASC;SG      | 33.33 (12)        | 33.33 (12)    | 100.00            | 100           |
| ACC;ADJ;INAN;MASC;SG | 66.67 (12)        | 66.67 (12)    | 91.67             | 91.67         |
| ADJ;GEN;NEUT;SG      | 50.00 (12)        | 50.00 (12)    | 100.00            | 100           |
| ADJ;ESS;MASC;SG      | 0.00 (10)         | 8.33 (12)     | 80.00             | 83.33         |
| ADJ;DAT;FEM;SG       | 81.82 (11)        | 75.00 (12)    | 100.00            | 100           |
| ADJ;INS;NEUT;SG      | 33.33 (12)        | 33.33 (12)    | 100.00            | 100           |
| ADJ;GEN;MASC;SG      | 50.00 (12)        | 50.00 (12)    | 100.00            | 100           |
| ADJ;GEN;PL           | 58.33 (12)        | 58.33 (12)    | 100.00            | 100           |
| ADJ;NEUT;NOM;SG      | 54.55 (11)        | 50.00 (12)    | 90.91             | 91.67         |
| ACC;ADJ;MASC;PL      | 58.33 (12)        | 58.33 (12)    | 100.00            | 100           |
| 3;FEM;PL;PST;V       | -                 | 0.00 (1)      | -                 | 100           |
| 3;PRS;SG;V           | -                 | 0.00 (1)      | -                 | 100           |
| 3;MASC;PST;SG;V      | -                 | 0.00 (1)      | -                 | 100           |
| 2;IMP;SG;V           | -                 | 0.00 (1)      | -                 | 0             |
| 3;MASC;PL;PST;V      | -                 | 0.00 (1)      | -                 | 100           |
| 2;IMP;PL;V           | -                 | 0.00 (1)      | -                 | 0             |
| 2;PL;PRS;V           | -                 | 0.00 (1)      | -                 | 0             |
| 1;IMP;PL;V           | -                 | 0.00 (1)      | -                 | 0             |
| 3;PL;PRS;V           | -                 | 0.00 (1)      | -                 | 100           |
| 2;PRS;SG;V           | -                 | 100.00 (1)    | -                 | 100           |
| 1;PL;PRS;V           | -                 | 0.00 (1)      | -                 | 100           |
| 3;NEUT;PST;SG;V      | -                 | 0.00 (1)      | -                 | 100           |
| 3;FEM;PST;SG;V       | -                 | 0.00 (1)      | -                 | 100           |
| 1;PRS;SG;V           | -                 | 0.00 (1)      | -                 | 0             |

Table 83: The performance of Artetxe et al. (2017)’s model on translating words belonging to a specific morphological category for the Slovak–Polish language pair (the grey numbers correspond to the dictionary sizes).

| Slovak–Russian       |                   |               |                   |               |
|----------------------|-------------------|---------------|-------------------|---------------|
| Morph                | Normal (In vocab) | Normal (+OOV) | Lexeme (In vocab) | Lexeme (+OOV) |
| ALL                  | 23.34 (814)       | 18.42 (1140)  | 82.56             | 80.7          |
| GEN;N;SG             | 23.61 (72)        | 21.25 (80)    | 79.17             | 78.75         |
| ACC;N;SG             | 23.29 (73)        | 21.25 (80)    | 64.38             | 62.5          |
| N;NOM;SG             | 24.36 (78)        | 23.75 (80)    | 70.51             | 66.25         |
| DAT;N;SG             | 21.15 (52)        | 16.25 (80)    | 65.38             | 56.25         |
| ESS;N;SG             | 20.75 (53)        | 15.00 (80)    | 66.04             | 53.75         |
| GEN;N;PL             | 25.00 (64)        | 19.51 (82)    | 71.88             | 64.63         |
| DAT;N;PL             | 30.56 (36)        | 19.28 (83)    | 94.44             | 86.75         |
| INS;N;PL             | 25.00 (44)        | 14.46 (83)    | 100.00            | 97.59         |
| N;NOM;PL             | 26.39 (72)        | 22.89 (83)    | 76.39             | 73.49         |
| ESS;N;PL             | 29.27 (41)        | 16.87 (83)    | 92.68             | 91.57         |
| INS;N;SG             | 31.58 (57)        | 23.75 (80)    | 85.96             | 87.5          |
| ACC;N;PL             | 30.23 (43)        | 23.64 (55)    | 81.40             | 76.36         |
| ADJ;DAT;NEUT;SG      | 18.18 (11)        | 11.76 (17)    | 100.00            | 100           |
| ACC;ADJ;FEM;SG       | 46.15 (13)        | 41.18 (17)    | 100.00            | 88.24         |
| ADJ;MASC;NOM;SG      | 41.18 (17)        | 41.18 (17)    | 88.24             | 88.24         |
| ADJ;GEN;PL           | 41.18 (17)        | 41.18 (17)    | 100.00            | 100           |
| ADJ;ESS;PL           | 41.18 (17)        | 41.18 (17)    | 100.00            | 100           |
| ADJ;NEUT;NOM;SG      | 37.50 (16)        | 41.18 (17)    | 75.00             | 76.47         |
| ACC;ADJ;INAN;MASC;SG | 41.18 (17)        | 41.18 (17)    | 88.24             | 88.24         |
| ADJ;NOM;PL           | 37.50 (16)        | 41.18 (17)    | 75.00             | 76.47         |
| ADJ;FEM;GEN;SG       | 33.33 (15)        | 29.41 (17)    | 93.33             | 94.12         |
| ADJ;FEM;NOM;SG       | 25.00 (16)        | 29.41 (17)    | 87.50             | 88.24         |
| ADJ;DAT;FEM;SG       | 33.33 (15)        | 29.41 (17)    | 93.33             | 94.12         |
| ADJ;GEN;MASC;SG      | 31.25 (16)        | 29.41 (17)    | 100.00            | 100           |
| ACC;ADJ;PL           | 37.50 (16)        | 41.18 (17)    | 75.00             | 76.47         |
| ACC;ADJ;NEUT;SG      | 37.50 (16)        | 41.18 (17)    | 75.00             | 76.47         |
| ADJ;GEN;NEUT;SG      | 31.25 (16)        | 29.41 (17)    | 100.00            | 100           |
| ADJ;ESS;NEUT;SG      | 31.25 (16)        | 29.41 (17)    | 75.00             | 70.59         |
| ADJ;DAT;MASC;SG      | 18.18 (11)        | 11.76 (17)    | 100.00            | 100           |
| ADJ;INS;PL           | 35.71 (14)        | 41.18 (17)    | 100.00            | 100           |
| ADJ;ESS;FEM;SG       | 33.33 (15)        | 29.41 (17)    | 93.33             | 94.12         |
| ADJ;INS;NEUT;SG      | 37.50 (16)        | 35.29 (17)    | 100.00            | 100           |
| ADJ;INS;MASC;SG      | 37.50 (16)        | 35.29 (17)    | 100.00            | 100           |
| ADJ;DAT;PL           | 37.50 (16)        | 35.29 (17)    | 100.00            | 100           |
| ACC;ADJ;MASC;SG      | 31.25 (16)        | 29.41 (17)    | 100.00            | 100           |
| ADJ;ESS;MASC;SG      | 31.25 (16)        | 29.41 (17)    | 75.00             | 70.59         |
| ADJ;FEM;INS;SG       | 0.00 (12)         | 0.00 (17)     | 58.33             | 58.82         |
| NFIN;V               | 3.82 (131)        | 2.44 (205)    | 95.42             | 95.12         |
| 2;PL;PRS;V           | 100.00 (1)        | 50.00 (2)     | 100.00            | 50            |
| 3;FEM;PL;PST;V       | 0.00 (1)          | 50.00 (2)     | 100.00            | 100           |
| 2;PRS;SG;V           | 0.00 (1)          | 0.00 (2)      | 0.00              | 0             |
| 2;IMP;PL;V           | -                 | 50.00 (2)     | -                 | 50            |
| 3;PRS;SG;V           | 50.00 (2)         | 50.00 (2)     | 50.00             | 50            |
| 3;NEUT;PST;SG;V      | 100.00 (1)        | 100.00 (2)    | 100.00            | 100           |
| 3;MASC;PL;PST;V      | 0.00 (1)          | 50.00 (2)     | 100.00            | 100           |
| 2;IMP;SG;V           | 0.00 (1)          | 0.00 (2)      | 0.00              | 0             |
| 3;MASC;PST;SG;V      | 100.00 (1)        | 100.00 (2)    | 100.00            | 100           |
| 3;FEM;PST;SG;V       | 100.00 (1)        | 100.00 (2)    | 100.00            | 100           |
| 1;PRS;SG;V           | 0.00 (1)          | 0.00 (2)      | 0.00              | 0             |
| 1;PL;PRS;V           | 100.00 (1)        | 50.00 (2)     | 100.00            | 50            |
| 3;PL;PRS;V           | 50.00 (2)         | 50.00 (2)     | 50.00             | 50            |

Table 84: The performance of Artetxe et al. (2017)’s model on translating words belonging to a specific morphological category for the Slovak–Russian language pair (the grey numbers correspond to the dictionary sizes).

| Slovak–Ukrainian     |                   |               |                   |               |
|----------------------|-------------------|---------------|-------------------|---------------|
| Morph                | Normal (In vocab) | Normal (+OOV) | Lexeme (In vocab) | Lexeme (+OOV) |
| ALL                  | 43.64 (330)       | 36.71 (425)   | 82.42             | 81.41         |
| ACC;N;SG             | 45.45 (44)        | 43.48 (46)    | 79.55             | 78.26         |
| ACC;N;PL             | 50.00 (42)        | 45.65 (46)    | 85.71             | 86.96         |
| ESS;N;SG             | 38.24 (34)        | 28.26 (46)    | 67.65             | 58.7          |
| ESS;N;PL             | 58.33 (24)        | 34.78 (46)    | 87.5              | 89.13         |
| GEN;N;PL             | 45.95 (37)        | 39.13 (46)    | 86.49             | 76.09         |
| N;NOM;SG             | 36.96 (46)        | 36.96 (46)    | 76.09             | 76.09         |
| N;NOM;PL             | 50.00 (42)        | 45.65 (46)    | 85.71             | 86.96         |
| DAT;N;SG             | 27.27 (33)        | 21.74 (46)    | 63.64             | 58.7          |
| INS;N;PL             | 35.48 (31)        | 26.09 (46)    | 100               | 97.83         |
| GEN;N;SG             | 50.00 (44)        | 47.83 (46)    | 84.09             | 84.78         |
| INS;N;SG             | 37.14 (35)        | 30.43 (46)    | 80                | 84.78         |
| DAT;N;PL             | 50.00 (22)        | 41.30 (46)    | 90.91             | 91.3          |
| ADJ;GEN;MASC;SG      | 100.00 (2)        | 100.00 (2)    | 100               | 100           |
| ADJ;NEUT;NOM;SG      | 50.00 (2)         | 50.00 (2)     | 100               | 100           |
| ADJ;INS;PL           | 50.00 (2)         | 50.00 (2)     | 100               | 100           |
| ADJ;ESS;FEM;SG       | 50.00 (2)         | 50.00 (2)     | 50                | 50            |
| ACC;ADJ;FEM;SG       | 50.00 (2)         | 50.00 (2)     | 100               | 100           |
| ADJ;ESS;PL           | 50.00 (2)         | 50.00 (2)     | 100               | 100           |
| ADJ;INS;MASC;SG      | 50.00 (2)         | 50.00 (2)     | 100               | 100           |
| ADJ;DAT;PL           | 50.00 (2)         | 50.00 (2)     | 100               | 100           |
| ADJ;NOM;PL           | 50.00 (2)         | 50.00 (2)     | 100               | 100           |
| ACC;ADJ;MASC;SG      | 100.00 (2)        | 100.00 (2)    | 100               | 100           |
| ACC;ADJ;NEUT;SG      | 50.00 (2)         | 50.00 (2)     | 100               | 100           |
| ADJ;FEM;INS;SG       | 50.00 (2)         | 50.00 (2)     | 100               | 100           |
| ADJ;DAT;FEM;SG       | 50.00 (2)         | 50.00 (2)     | 50                | 50            |
| ACC;ADJ;INAN;MASC;SG | 50.00 (2)         | 50.00 (2)     | 100               | 100           |
| ADJ;FEM;NOM;SG       | 50.00 (2)         | 50.00 (2)     | 50                | 50            |
| ADJ;ESS;MASC;SG      | 50.00 (2)         | 50.00 (2)     | 50                | 50            |
| ADJ;DAT;MASC;SG      | 0.00 (1)          | 0.00 (2)      | 0                 | 0             |
| ACC;ADJ;PL           | 50.00 (2)         | 50.00 (2)     | 100               | 100           |
| ADJ;GEN;PL           | 50.00 (2)         | 50.00 (2)     | 100               | 100           |
| ADJ;FEM;GEN;SG       | 50.00 (2)         | 50.00 (2)     | 50                | 50            |
| ADJ;GEN;NEUT;SG      | 100.00 (2)        | 100.00 (2)    | 100               | 100           |
| ADJ;ESS;NEUT;SG      | 50.00 (2)         | 50.00 (2)     | 50                | 50            |
| ADJ;MASC;NOM;SG      | 50.00 (2)         | 50.00 (2)     | 100               | 100           |
| ADJ;DAT;NEUT;SG      | 0.00 (1)          | 0.00 (2)      | 0                 | 0             |
| ADJ;INS;NEUT;SG      | 50.00 (2)         | 50.00 (2)     | 100               | 100           |
| NFIN;V               | 33.33 (3)         | 25.00 (4)     | 100               | 100           |

Table 85: The performance of Artetxe et al. (2017)’s model on translating words belonging to a specific morphological category for the Slovak–Ukrainian language pair (the grey numbers correspond to the dictionary sizes).

| Ukrainian–Czech      |                   |               |                   |               |
|----------------------|-------------------|---------------|-------------------|---------------|
| Morph                | Normal (In vocab) | Normal (+OOV) | Lexeme (In vocab) | Lexeme (+OOV) |
| ALL                  | 43.35 (699)       | 38.55 (869)   | 78.97             | 75.37         |
| N;PL;VOC             | 50.00 (74)        | 46.25 (80)    | 83.78             | 83.75         |
| ACC;N;PL             | 54.05 (74)        | 50.00 (80)    | 87.84             | 87.5          |
| INS;N;PL             | 27.69 (65)        | 25.00 (80)    | 81.54             | 78.75         |
| ACC;N;SG             | 53.16 (79)        | 52.44 (82)    | 77.22             | 74.39         |
| DAT;N;PL             | 56.10 (41)        | 41.25 (80)    | 95.12             | 93.75         |
| GEN;N;PL             | 51.39 (72)        | 47.50 (80)    | 79.17             | 77.5          |
| N;NOM;PL             | 50.00 (74)        | 46.25 (80)    | 83.78             | 83.75         |
| ESS;N;PL             | 40.82 (49)        | 32.50 (80)    | 85.71             | 80            |
| ESS;N;SG             | 36.76 (68)        | 33.33 (81)    | 70.59             | 65.43         |
| DAT;N;SG             | 38.46 (65)        | 34.15 (82)    | 66.15             | 60.98         |
| GEN;N;SG             | 59.49 (79)        | 57.32 (82)    | 87.34             | 84.15         |
| INS;N;SG             | 44.00 (75)        | 41.46 (82)    | 82.67             | 80.49         |
| N;NOM;SG             | 49.38 (81)        | 48.78 (82)    | 79.01             | 78.05         |
| N;SG;VOC             | 40.00 (35)        | 30.49 (82)    | 54.29             | 50            |
| 1;IMP;PL;V           | 20.00 (5)         | 16.67 (6)     | 40                | 33.33         |
| 3;NEUT;PST;SG;V      | 40.00 (5)         | 50.00 (6)     | 100               | 100           |
| NFIN;V               | 66.67 (6)         | 66.67 (6)     | 100               | 100           |
| 3;MASC;PST;SG;V      | 50.00 (6)         | 50.00 (6)     | 100               | 100           |
| 3;FEM;PST;SG;V       | 83.33 (6)         | 83.33 (6)     | 100               | 100           |
| 2;IMP;SG;V           | 0.00 (6)          | 0.00 (6)      | 33.33             | 33.33         |
| 2;IMP;PL;V           | 33.33 (6)         | 33.33 (6)     | 100               | 100           |
| 1;PRS;SG;V           | 25.00 (4)         | 20.00 (5)     | 50                | 40            |
| 3;PL;PRS;V           | 40.00 (5)         | 40.00 (5)     | 60                | 60            |
| 3;FEM;PL;PST;V       | 66.67 (6)         | 66.67 (6)     | 100               | 100           |
| 2;PL;PRS;V           | 25.00 (4)         | 20.00 (5)     | 75                | 80            |
| 3;PRS;SG;V           | 40.00 (5)         | 40.00 (5)     | 80                | 80            |
| 2;PRS;SG;V           | 40.00 (5)         | 40.00 (5)     | 80                | 80            |
| 3;MASC;PL;PST;V      | 66.67 (6)         | 66.67 (6)     | 100               | 100           |
| 1;PL;PRS;V           | 25.00 (4)         | 20.00 (5)     | 75                | 60            |
| 3;FUT;PL;V           | 0.00 (1)          | 0.00 (1)      | 0                 | 0             |
| 3;FUT;SG;V           | 0.00 (1)          | 0.00 (1)      | 0                 | 0             |
| 2;FUT;PL;V           | 0.00 (1)          | 0.00 (1)      | 0                 | 0             |
| 1;FUT;PL;V           | 0.00 (1)          | 0.00 (1)      | 100               | 100           |
| 2;FUT;SG;V           | 0.00 (1)          | 0.00 (1)      | 0                 | 0             |
| 1;FUT;SG;V           | 0.00 (1)          | 0.00 (1)      | 100               | 100           |
| ADJ;MASC;NOM;SG      | 0.00 (1)          | 0.00 (1)      | 100               | 100           |
| ADJ;ESS;PL           | 0.00 (1)          | 0.00 (1)      | 100               | 100           |
| ADJ;DAT;NEUT;SG      | 0.00 (1)          | 0.00 (1)      | 100               | 100           |
| ACC;ADJ;FEM;SG       | 0.00 (1)          | 0.00 (1)      | 100               | 100           |
| ACC;ADJ;MASC;SG      | 0.00 (1)          | 0.00 (1)      | 100               | 100           |
| ADJ;NEUT;NOM;SG      | 0.00 (1)          | 0.00 (1)      | 100               | 100           |
| ADJ;GEN;NEUT;SG      | 0.00 (1)          | 0.00 (1)      | 100               | 100           |
| ADJ;INS;MASC;SG      | 0.00 (1)          | 0.00 (1)      | 100               | 100           |
| ADJ;FEM;NOM;SG       | 0.00 (1)          | 0.00 (1)      | 100               | 100           |
| ADJ;DAT;FEM;SG       | 0.00 (1)          | 0.00 (1)      | 0                 | 0             |
| ADJ;DAT;PL           | 0.00 (1)          | 0.00 (1)      | 100               | 100           |
| ADJ;ESS;NEUT;SG      | 0.00 (1)          | 0.00 (1)      | 100               | 100           |
| ADJ;FEM;GEN;SG       | 0.00 (1)          | 0.00 (1)      | 100               | 100           |
| ADJ;GEN;PL           | 0.00 (1)          | 0.00 (1)      | 100               | 100           |
| ADJ;DAT;MASC;SG      | 0.00 (1)          | 0.00 (1)      | 100               | 100           |
| ADJ;INS;PL           | 0.00 (1)          | 0.00 (1)      | 100               | 100           |
| ADJ;GEN;MASC;SG      | 0.00 (1)          | 0.00 (1)      | 100               | 100           |
| ACC;ADJ;NEUT;SG      | 0.00 (1)          | 0.00 (1)      | 100               | 100           |
| ACC;ADJ;INAN;MASC;SG | 0.00 (1)          | 0.00 (1)      | 100               | 100           |
| ADJ;ESS;MASC;SG      | 0.00 (1)          | 0.00 (1)      | 100               | 100           |
| ADJ;ESS;FEM;SG       | 0.00 (1)          | 0.00 (1)      | 0                 | 0             |

Table 86: The performance of Artetxe et al. (2017)’s model on translating words belonging to a specific morphological category for the Ukrainian–Czech language pair (the grey numbers correspond to the dictionary sizes).

| Ukrainian–Polish     |                   |               |                   |               |
|----------------------|-------------------|---------------|-------------------|---------------|
| Morph                | Normal (In vocab) | Normal (+OOV) | Lexeme (In vocab) | Lexeme (+OOV) |
| ALL                  | 54.47 (850)       | 47.15 (1054)  | 82.59             | 79.41         |
| INS;N;SG             | 54.17 (96)        | 49.52 (105)   | 88.54             | 86.67         |
| GEN;N;PL             | 45.83 (96)        | 43.69 (103)   | 65.62             | 67.96         |
| ACC;N;SG             | 56.86 (102)       | 55.24 (105)   | 85.29             | 83.81         |
| DAT;N;PL             | 60.78 (51)        | 43.69 (103)   | 94.12             | 90.29         |
| ACC;N;PL             | 64.65 (99)        | 62.14 (103)   | 90.91             | 89.32         |
| ESS;N;PL             | 71.01 (69)        | 61.17 (103)   | 92.75             | 93.2          |
| N;PL;VOC             | 65.00 (100)       | 63.11 (103)   | 92.00             | 90.29         |
| N;NOM;SG             | 55.24 (105)       | 55.24 (105)   | 83.81             | 83.81         |
| GEN;N;SG             | 61.76 (102)       | 60.00 (105)   | 91.18             | 87.62         |
| INS;N;PL             | 65.52 (87)        | 53.40 (103)   | 98.85             | 99.03         |
| ESS;N;SG             | 47.83 (92)        | 40.95 (105)   | 71.74             | 66.67         |
| N;SG;VOC             | 33.33 (51)        | 25.71 (105)   | 62.75             | 53.33         |
| N;NOM;PL             | 65.00 (100)       | 63.11 (103)   | 92.00             | 90.29         |
| DAT;N;SG             | 48.75 (80)        | 37.14 (105)   | 70.00             | 60.95         |
| 2;IMP;PL;V           | -                 | 0.00 (2)      | -                 | 0             |
| 2;FEM;PL;PST;V       | -                 | 50.00 (2)     | -                 | 100           |
| 1;PL;PRS;V           | 0.00 (2)          | 0.00 (2)      | 50.00             | 50            |
| 2;PRS;SG;V           | 0.00 (2)          | 0.00 (2)      | 50.00             | 50            |
| 3;MASC;PL;PST;V      | 50.00 (2)         | 50.00 (2)     | 100.00            | 100           |
| 2;PL;PRS;V           | 0.00 (1)          | 0.00 (2)      | 0.00              | 0             |
| 1;FEM;PL;PST;V       | -                 | 50.00 (2)     | -                 | 100           |
| 3;FEM;PST;SG;V       | 100.00 (1)        | 50.00 (2)     | 100.00            | 50            |
| 2;FEM;PST;SG;V       | -                 | 50.00 (2)     | -                 | 50            |
| 1;PRS;SG;V           | 0.00 (2)          | 0.00 (2)      | 50.00             | 50            |
| 3;PRS;SG;V           | 50.00 (2)         | 50.00 (2)     | 100.00            | 100           |
| 3;NEUT;PST;SG;V      | 100.00 (1)        | 50.00 (2)     | 100.00            | 50            |
| 1;MASC;PL;PST;V      | 100.00 (1)        | 50.00 (2)     | 100.00            | 100           |
| 3;MASC;PST;SG;V      | 50.00 (2)         | 50.00 (2)     | 100.00            | 100           |
| 1;IMP;PL;V           | -                 | 0.00 (2)      | -                 | 50            |
| 2;MASC;PL;PST;V      | -                 | 50.00 (2)     | -                 | 100           |
| 3;FEM;PL;PST;V       | 100.00 (1)        | 50.00 (2)     | 100.00            | 100           |
| 2;MASC;PST;SG;V      | 100.00 (1)        | 50.00 (2)     | 100.00            | 100           |
| 3;PL;PRS;V           | 50.00 (2)         | 50.00 (2)     | 100.00            | 100           |
| NFIN;V               | 0.00 (2)          | 0.00 (2)      | 50.00             | 50            |
| 1;FEM;PST;SG;V       | 100.00 (1)        | 50.00 (2)     | 100.00            | 50            |
| 2;IMP;SG;V           | 0.00 (1)          | 0.00 (2)      | 100.00            | 100           |
| 1;MASC;PST;SG;V      | 100.00 (1)        | 50.00 (2)     | 100.00            | 100           |
| ADJ;ESS;MASC;SG      | 0.00 (2)          | 0.00 (2)      | 100.00            | 100           |
| ADJ;MASC;NOM;SG      | 50.00 (2)         | 50.00 (2)     | 100.00            | 100           |
| ADJ;GEN;NEUT;SG      | 50.00 (2)         | 50.00 (2)     | 100.00            | 100           |
| ADJ;NOM;PL           | 100.00 (2)        | 100.00 (2)    | 100.00            | 100           |
| ADJ;NEUT;NOM;SG      | 50.00 (2)         | 50.00 (2)     | 100.00            | 100           |
| ACC;ADJ;NEUT;SG      | 50.00 (2)         | 50.00 (2)     | 100.00            | 100           |
| ADJ;INS;NEUT;SG      | 0.00 (2)          | 0.00 (2)      | 100.00            | 100           |
| ADJ;DAT;PL           | 0.00 (2)          | 0.00 (2)      | 100.00            | 100           |
| ADJ;INS;PL           | 100.00 (2)        | 100.00 (2)    | 100.00            | 100           |
| ADJ;FEM;INS;SG       | 100.00 (2)        | 100.00 (2)    | 100.00            | 100           |
| ACC;ADJ;FEM;SG       | 50.00 (2)         | 50.00 (2)     | 100.00            | 100           |
| ADJ;FEM;NOM;SG       | 50.00 (2)         | 50.00 (2)     | 100.00            | 100           |
| ADJ;FEM;GEN;SG       | 50.00 (2)         | 50.00 (2)     | 100.00            | 100           |
| ADJ;GEN;MASC;SG      | 50.00 (2)         | 50.00 (2)     | 100.00            | 100           |
| ADJ;DAT;MASC;SG      | 0.00 (2)          | 0.00 (2)      | 100.00            | 100           |
| ADJ;INS;MASC;SG      | 0.00 (2)          | 0.00 (2)      | 100.00            | 100           |
| ADJ;ESS;NEUT;SG      | 0.00 (2)          | 0.00 (2)      | 100.00            | 100           |
| ADJ;GEN;PL           | 100.00 (2)        | 100.00 (2)    | 100.00            | 100           |
| ACC;ADJ;PL           | 100.00 (2)        | 100.00 (2)    | 100.00            | 100           |
| ACC;ADJ;MASC;SG      | 50.00 (2)         | 50.00 (2)     | 100.00            | 100           |
| ACC;ADJ;INAN;MASC;SG | 50.00 (2)         | 50.00 (2)     | 100.00            | 100           |
| ADJ;ESS;FEM;SG       | 50.00 (2)         | 50.00 (2)     | 100.00            | 100           |
| ADJ;ESS;PL           | 100.00 (2)        | 100.00 (2)    | 100.00            | 100           |
| ADJ;DAT;NEUT;SG      | 0.00 (2)          | 0.00 (2)      | 100.00            | 100           |
| ADJ;DAT;FEM;SG       | 50.00 (2)         | 50.00 (2)     | 100.00            | 100           |

Table 87: The performance of Artetxe et al. (2017)’s model on translating words belonging to a specific morphological category for the Ukrainian–Polish language pair (the grey numbers correspond to the dictionary sizes).



| Ukrainian–Russian    |                   |               |                   |               |
|----------------------|-------------------|---------------|-------------------|---------------|
| Morph                | Normal (In vocab) | Normal (+OOV) | Lexeme (In vocab) | Lexeme (+OOV) |
| ALL                  | 69.59 (786)       | 65.59 (933)   | 91.09             | 89.5          |
| ESS;N;SG             | 65.91 (88)        | 63.64 (99)    | 85.23             | 81.82         |
| INS;N;PL             | 81.58 (76)        | 69.39 (98)    | 98.68             | 100           |
| ACC;N;SG             | 73.20 (97)        | 71.72 (99)    | 93.81             | 91.92         |
| GEN;N;PL             | 69.32 (88)        | 64.29 (98)    | 84.09             | 78.57         |
| GEN;N;SG             | 78.12 (96)        | 75.76 (99)    | 93.75             | 91.92         |
| DAT;N;PL             | 77.36 (53)        | 67.35 (98)    | 92.45             | 93.88         |
| N;NOM;SG             | 71.72 (99)        | 71.72 (99)    | 92.93             | 92.93         |
| INS;N;SG             | 72.04 (93)        | 69.70 (99)    | 95.7              | 93.94         |
| N;NOM;PL             | 70.10 (97)        | 69.39 (98)    | 89.69             | 89.8          |
| DAT;N;SG             | 63.64 (88)        | 59.60 (99)    | 81.82             | 76.77         |
| ESS;N;PL             | 83.64 (55)        | 72.45 (98)    | 96.36             | 90.82         |
| ACC;N;PL             | 62.71 (59)        | 63.93 (61)    | 84.75             | 85.25         |
| ADJ;FEM;NOM;SG       | 0.00 (2)          | 0.00 (2)      | 100               | 100           |
| ACC;ADJ;NEUT;SG      | 0.00 (2)          | 0.00 (2)      | 100               | 100           |
| ACC;ADJ;FEM;SG       | 0.00 (2)          | 0.00 (2)      | 100               | 100           |
| ADJ;DAT;PL           | 0.00 (2)          | 0.00 (2)      | 100               | 100           |
| ADJ;ESS;NEUT;SG      | 0.00 (1)          | 0.00 (2)      | 100               | 100           |
| ADJ;MASC;NOM;SG      | 0.00 (2)          | 0.00 (2)      | 100               | 100           |
| ADJ;FEM;GEN;SG       | 0.00 (2)          | 0.00 (2)      | 100               | 100           |
| ADJ;ESS;FEM;SG       | 0.00 (2)          | 0.00 (2)      | 100               | 50            |
| ACC;ADJ;INAN;MASC;SG | 0.00 (2)          | 0.00 (2)      | 100               | 100           |
| ADJ;NOM;PL           | 0.00 (2)          | 0.00 (2)      | 50                | 50            |
| ACC;ADJ;MASC;SG      | 0.00 (2)          | 0.00 (2)      | 100               | 100           |
| ADJ;DAT;FEM;SG       | 0.00 (2)          | 0.00 (2)      | 100               | 50            |
| ADJ;INS;PL           | 0.00 (2)          | 0.00 (2)      | 100               | 100           |
| ADJ;INS;MASC;SG      | 0.00 (2)          | 0.00 (2)      | 100               | 100           |
| ADJ;GEN;NEUT;SG      | 0.00 (2)          | 0.00 (2)      | 100               | 100           |
| ADJ;FEM;INS;SG       | 0.00 (2)          | 0.00 (2)      | 50                | 50            |
| ACC;ADJ;INAN;PL      | 0.00 (2)          | 0.00 (2)      | 50                | 50            |
| ADJ;ESS;PL           | 0.00 (2)          | 0.00 (2)      | 100               | 100           |
| ADJ;GEN;PL           | 0.00 (2)          | 0.00 (2)      | 100               | 100           |
| ADJ;NEUT;NOM;SG      | 0.00 (2)          | 0.00 (2)      | 100               | 100           |
| ADJ;INS;NEUT;SG      | 0.00 (2)          | 0.00 (2)      | 100               | 100           |
| ADJ;ESS;MASC;SG      | 0.00 (1)          | 0.00 (2)      | 100               | 100           |
| ADJ;DAT;MASC;SG      | 0.00 (1)          | 0.00 (2)      | 100               | 100           |
| ACC;ADJ;PL           | 0.00 (2)          | 0.00 (2)      | 100               | 100           |
| ADJ;DAT;NEUT;SG      | 0.00 (1)          | 0.00 (2)      | 100               | 100           |
| ADJ;GEN;MASC;SG      | 0.00 (2)          | 0.00 (2)      | 100               | 100           |
| 1;FEM;PST;SG;V       | 66.67 (3)         | 66.67 (3)     | 100               | 100           |
| 2;MASC;PST;SG;V      | 66.67 (3)         | 66.67 (3)     | 100               | 100           |
| 2;IMP;SG;V           | 33.33 (3)         | 33.33 (3)     | 33.33             | 66.67         |
| 2;FEM;PL;PST;V       | 66.67 (3)         | 66.67 (3)     | 100               | 100           |
| 3;PL;PRS;V           | 66.67 (3)         | 66.67 (3)     | 100               | 100           |
| 1;PRS;SG;V           | 66.67 (3)         | 66.67 (3)     | 100               | 100           |
| 2;MASC;PL;PST;V      | 66.67 (3)         | 66.67 (3)     | 100               | 100           |
| 2;PRS;SG;V           | 100.00 (2)        | 66.67 (3)     | 100               | 100           |
| 1;FEM;PL;PST;V       | 66.67 (3)         | 66.67 (3)     | 100               | 100           |
| 1;PL;PRS;V           | 100.00 (2)        | 66.67 (3)     | 100               | 100           |
| NFIN;V               | 66.67 (3)         | 66.67 (3)     | 100               | 100           |
| 1;MASC;PST;SG;V      | 66.67 (3)         | 66.67 (3)     | 100               | 100           |
| 2;IMP;PL;V           | 50.00 (2)         | 33.33 (3)     | 100               | 66.67         |
| 3;PRS;SG;V           | 66.67 (3)         | 66.67 (3)     | 100               | 100           |
| 1;MASC;PL;PST;V      | 66.67 (3)         | 66.67 (3)     | 100               | 100           |
| 3;NEUT;PST;SG;V      | 66.67 (3)         | 66.67 (3)     | 100               | 100           |
| 2;PL;PRS;V           | 50.00 (2)         | 33.33 (3)     | 50                | 66.67         |
| 2;FEM;PST;SG;V       | 66.67 (3)         | 66.67 (3)     | 100               | 100           |
| 3;MASC;PL;PST;V      | 66.67 (3)         | 66.67 (3)     | 100               | 100           |
| 3;MASC;PST;SG;V      | 66.67 (3)         | 66.67 (3)     | 100               | 100           |
| 3;FEM;PST;SG;V       | 66.67 (3)         | 66.67 (3)     | 100               | 100           |
| 3;FEM;PL;PST;V       | 66.67 (3)         | 66.67 (3)     | 100               | 100           |

Table 88: The performance of [Artetxe et al. \(2017\)](#)’s model on translating words belonging to a specific morphological category for the Ukrainian–Russian language pair (the grey numbers correspond to the dictionary sizes).

| Ukrainian–Slovak     |                   |               |                   |               |
|----------------------|-------------------|---------------|-------------------|---------------|
| Morph                | Normal (In vocab) | Normal (+OOV) | Lexeme (In vocab) | Lexeme (+OOV) |
| ALL                  | 33.54 (322)       | 28.33 (420)   | 81.37             | 79.05         |
| ESS;N;SG             | 33.33 (33)        | 26.67 (45)    | 84.85             | 68.89         |
| ACC;N;SG             | 26.19 (42)        | 23.91 (46)    | 78.57             | 73.91         |
| ACC;N;PL             | 29.27 (41)        | 26.67 (45)    | 87.8              | 84.44         |
| GEN;N;PL             | 31.58 (38)        | 26.09 (46)    | 73.68             | 69.57         |
| N;NOM;PL             | 28.57 (42)        | 26.67 (45)    | 88.1              | 84.44         |
| ESS;N;PL             | 59.09 (22)        | 35.56 (45)    | 95.45             | 93.33         |
| N;NOM;SG             | 24.44 (45)        | 23.91 (46)    | 71.11             | 69.57         |
| INS;N;PL             | 36.67 (30)        | 28.89 (45)    | 100               | 100           |
| DAT;N;PL             | 40.00 (20)        | 26.67 (45)    | 75                | 71.11         |
| DAT;N;SG             | 27.03 (37)        | 21.74 (46)    | 78.38             | 67.39         |
| INS;N;SG             | 34.21 (38)        | 30.43 (46)    | 81.58             | 82.61         |
| GEN;N;SG             | 31.82 (44)        | 30.43 (46)    | 88.64             | 86.96         |
| NFIN;V               | 50.00 (2)         | 50.00 (2)     | 100               | 100           |
| ACC;ADJ;NEUT;SG      | 0.00 (1)          | 0.00 (1)      | 100               | 100           |
| ADJ;GEN;PL           | 0.00 (1)          | 0.00 (1)      | 100               | 100           |
| ADJ;FEM;INS;SG       | 100.00 (1)        | 100.00 (1)    | 100               | 100           |
| ADJ;DAT;MASC;SG      | 0.00 (1)          | 0.00 (1)      | 100               | 100           |
| ADJ;DAT;NEUT;SG      | 0.00 (1)          | 0.00 (1)      | 100               | 100           |
| ADJ;FEM;NOM;SG       | 0.00 (1)          | 0.00 (1)      | 100               | 100           |
| ADJ;DAT;FEM;SG       | 0.00 (1)          | 0.00 (1)      | 0                 | 0             |
| ADJ;ESS;MASC;SG      | 0.00 (1)          | 0.00 (1)      | 100               | 100           |
| ACC;ADJ;MASC;SG      | 0.00 (1)          | 0.00 (1)      | 100               | 100           |
| ACC;ADJ;PL           | 0.00 (1)          | 0.00 (1)      | 100               | 100           |
| ADJ;INS;MASC;SG      | 0.00 (1)          | 0.00 (1)      | 100               | 100           |
| ADJ;INS;PL           | 100.00 (1)        | 100.00 (1)    | 100               | 100           |
| ADJ;FEM;GEN;SG       | 100.00 (1)        | 100.00 (1)    | 100               | 100           |
| ADJ;DAT;PL           | 0.00 (1)          | 0.00 (1)      | 100               | 100           |
| ADJ;MASC;NOM;SG      | 100.00 (1)        | 100.00 (1)    | 100               | 100           |
| ACC;ADJ;FEM;SG       | 100.00 (1)        | 100.00 (1)    | 100               | 100           |
| ADJ;NEUT;NOM;SG      | 0.00 (1)          | 0.00 (1)      | 100               | 100           |
| ADJ;INS;NEUT;SG      | 0.00 (1)          | 0.00 (1)      | 100               | 100           |
| ADJ;NOM;PL           | 100.00 (1)        | 100.00 (1)    | 100               | 100           |
| ADJ;ESS;FEM;SG       | 0.00 (1)          | 0.00 (1)      | 0                 | 0             |
| ADJ;GEN;NEUT;SG      | 0.00 (1)          | 0.00 (1)      | 100               | 100           |
| ACC;ADJ;INAN;MASC;SG | 100.00 (1)        | 100.00 (1)    | 100               | 100           |
| ADJ;ESS;NEUT;SG      | 0.00 (1)          | 0.00 (1)      | 100               | 100           |
| ADJ;ESS;PL           | 0.00 (1)          | 0.00 (1)      | 100               | 100           |
| ADJ;GEN;MASC;SG      | 0.00 (1)          | 0.00 (1)      | 100               | 100           |

Table 89: The performance of [Artetxe et al. \(2017\)](#)’s model on translating words belonging to a specific morphological category for the Ukrainian–Slovak language pair (the grey numbers correspond to the dictionary sizes).

| Polish–Spanish       |                   |               |                   |               |
|----------------------|-------------------|---------------|-------------------|---------------|
| Morph                | Normal (In vocab) | Normal (+OOV) | Lexeme (In vocab) | Lexeme (+OOV) |
| ALL                  | 34.98 (8964)      | 27.42 (12759) | 78.07             | 68.34         |
| ACC;N;PL             | 38.45 (827)       | 36.43 (884)   | 84.76             | 82.92         |
| ACC;N;SG             | 40.02 (922)       | 38.67 (962)   | 79.72             | 79.11         |
| DAT;N;PL             | 20.07 (304)       | 13.28 (881)   | 50.66             | 50.17         |
| DAT;N;SG             | 27.88 (599)       | 19.77 (961)   | 78.30             | 71.18         |
| ESS;N;PL             | 32.61 (552)       | 26.11 (881)   | 81.34             | 77.98         |
| ESS;N;SG             | 34.33 (766)       | 30.76 (959)   | 77.94             | 74.45         |
| GEN;N;PL             | 40.41 (782)       | 36.30 (887)   | 82.99             | 79.14         |
| GEN;N;SG             | 40.84 (933)       | 39.60 (962)   | 87.03             | 86.38         |
| INS;N;PL             | 26.53 (622)       | 22.25 (881)   | 84.41             | 82.29         |
| INS;N;SG             | 34.53 (837)       | 31.29 (962)   | 76.46             | 74.74         |
| N;NOM;PL             | 38.01 (826)       | 36.01 (883)   | 84.38             | 82.45         |
| N;NOM;SG             | 40.95 (950)       | 40.44 (962)   | 84.00             | 83.37         |
| N;PL;VOC             | 38.01 (826)       | 36.01 (883)   | 84.38             | 82.45         |
| N;SG;VOC             | 32.98 (561)       | 29.14 (961)   | 75.58             | 71.7          |
| 1;COND;FEM;PL;V      | -                 | 2.08 (48)     | -                 | 27.08         |
| 1;COND;FEM;SG;V      | 0.00 (1)          | 2.08 (48)     | 0.00              | 2.08          |
| 1;COND;MASC;PL;V     | 25.00 (4)         | 20.83 (48)    | 75.00             | 70.83         |
| 1;COND;MASC;SG;V     | 0.00 (8)          | 0.00 (48)     | 0.00              | 0             |
| 1;FEM;PL;PST;V       | -                 | 0.00 (62)     | -                 | 8.06          |
| 1;FEM;PST;SG;V       | 18.75 (16)        | 6.45 (62)     | 25.00             | 9.68          |
| 1;IMP;PL;V           | 0.00 (8)          | 4.17 (48)     | 25.00             | 16.67         |
| 1;MASC;PL;PST;V      | 30.77 (13)        | 8.06 (62)     | 46.15             | 27.42         |
| 1;MASC;PST;SG;V      | 6.67 (30)         | 3.23 (62)     | 26.67             | 4.84          |
| 1;PL;PRS;V           | 41.38 (29)        | 29.17 (48)    | 58.62             | 41.67         |
| 1;PRS;SG;V           | 13.51 (37)        | 10.42 (48)    | 16.22             | 12.5          |
| 2;COND;FEM;PL;V      | -                 | 0.00 (48)     | -                 | 0             |
| 2;COND;FEM;SG;V      | 0.00 (1)          | 2.08 (48)     | 0.00              | 6.25          |
| 2;COND;MASC;PL;V     | -                 | 0.00 (48)     | -                 | 10.42         |
| 2;COND;MASC;SG;V     | 0.00 (2)          | 4.17 (48)     | 0.00              | 4.17          |
| 2;FEM;PL;PST;V       | -                 | 0.00 (62)     | -                 | 0             |
| 2;FEM;PST;SG;V       | 0.00 (4)          | 9.68 (62)     | 0.00              | 11.29         |
| 2;IMP;PL;V           | 0.00 (6)          | 0.00 (48)     | 0.00              | 0             |
| 2;IMP;SG;V           | 8.00 (25)         | 8.33 (48)     | 12.00             | 12.5          |
| 2;MASC;PL;PST;V      | 0.00 (1)          | 0.00 (62)     | 0.00              | 1.61          |
| 2;MASC;PST;SG;V      | 0.00 (10)         | 3.23 (62)     | 10.00             | 4.84          |
| 2;PL;PRS;V           | 11.11 (9)         | 0.00 (48)     | 11.11             | 0             |
| 2;PRS;SG;V           | 4.35 (23)         | 4.17 (48)     | 13.04             | 6.25          |
| 3;COND;FEM;PL;V      | 12.50 (8)         | 14.58 (48)    | 62.50             | 45.83         |
| 3;COND;FEM;SG;V      | 11.11 (9)         | 20.83 (48)    | 66.67             | 35.42         |
| 3;COND;MASC;PL;V     | 0.00 (4)          | 2.08 (48)     | 25.00             | 18.75         |
| 3;COND;MASC;SG;V     | 33.33 (12)        | 22.92 (48)    | 66.67             | 39.58         |
| 3;COND;NEUT;SG;V     | 0.00 (7)          | 4.17 (48)     | 28.57             | 4.17          |
| 3;FEM;PL;PST;V       | 51.16 (43)        | 41.94 (62)    | 74.42             | 72.58         |
| 3;FEM;PST;SG;V       | 43.14 (51)        | 40.32 (62)    | 68.63             | 67.74         |
| 3;MASC;PL;PST;V      | 20.41 (49)        | 17.74 (62)    | 61.22             | 51.61         |
| 3;MASC;PST;SG;V      | 37.04 (54)        | 32.26 (62)    | 61.11             | 54.84         |
| 3;NEUT;PST;SG;V      | 4.76 (42)         | 3.23 (62)     | 9.52              | 8.06          |
| 3;PL;PRS;V           | 47.62 (42)        | 43.75 (48)    | 78.57             | 72.92         |
| 3;PRS;SG;V           | 34.78 (46)        | 33.33 (48)    | 54.35             | 52.08         |
| NFIN;V               | 21.28 (47)        | 20.83 (48)    | 89.36             | 87.5          |
| ACC;ADJ;FEM;SG       | 25.99 (177)       | 25.00 (188)   | 69.49             | 67.02         |
| ACC;ADJ;INAN;MASC;SG | 50.00 (188)       | 49.47 (190)   | 88.83             | 88.42         |
| ACC;ADJ;MASC;PL      | 54.19 (179)       | 51.32 (189)   | 96.09             | 96.3          |
| ACC;ADJ;MASC;SG      | 43.17 (183)       | 41.58 (190)   | 78.69             | 78.42         |
| ACC;ADJ;PL           | 56.76 (185)       | 55.03 (189)   | 94.05             | 94.18         |
| ADJ;DAT;FEM;SG       | 50.28 (177)       | 47.34 (188)   | 87.57             | 87.23         |
| ADJ;DAT;MASC;SG      | 8.65 (104)        | 8.95 (190)    | 56.73             | 58.42         |
| ADJ;DAT;PL           | 46.11 (180)       | 43.92 (189)   | 95.00             | 94.71         |
| ADJ;ESS;FEM;SG       | 50.28 (177)       | 47.34 (188)   | 87.57             | 87.23         |
| ADJ;ESS;MASC;SG      | 46.41 (181)       | 44.21 (190)   | 95.03             | 94.74         |
| ADJ;ESS;PL           | 54.19 (179)       | 51.32 (189)   | 96.09             | 96.3          |
| ADJ;FEM;GEN;SG       | 50.28 (177)       | 47.34 (188)   | 87.57             | 87.23         |
| ADJ;FEM;INS;SG       | 25.99 (177)       | 25.00 (188)   | 69.49             | 67.02         |
| ADJ;FEM;NOM;SG       | 50.55 (182)       | 48.94 (188)   | 93.41             | 93.62         |
| ADJ;GEN;MASC;SG      | 43.17 (183)       | 41.58 (190)   | 78.69             | 78.42         |
| ADJ;GEN;PL           | 54.19 (179)       | 51.32 (189)   | 96.09             | 96.3          |
| ADJ;INS;MASC;SG      | 46.41 (181)       | 44.21 (190)   | 95.03             | 94.74         |
| ADJ;INS;PL           | 25.16 (155)       | 23.28 (189)   | 90.32             | 91.01         |
| ADJ;MASC;NOM;PL      | 29.06 (117)       | 20.63 (189)   | 65.81             | 55.56         |
| ADJ;MASC;NOM;SG      | 50.00 (188)       | 49.47 (190)   | 88.83             | 88.42         |
| ADJ;NOM;PL           | 56.76 (185)       | 55.03 (189)   | 94.05             | 94.18         |

Table 90: The performance of [Artetxe et al. \(2017\)](#)’s model on translating words belonging to a specific morphological category for the Polish–Spanish language pair (the grey numbers correspond to the dictionary sizes).

| Morph           | Spanish–Polish    |               |                   |               |
|-----------------|-------------------|---------------|-------------------|---------------|
|                 | Normal (In vocab) | Normal (+OOV) | Lexeme (In vocab) | Lexeme (+OOV) |
| ALL             | 27.80 (4270)      | 20.85 (6095)  | 81.17             | 65.5          |
| N;PL            | 30.99 (1139)      | 29.45 (1226)  | 87.09             | 87.68         |
| N;SG            | 33.74 (1316)      | 33.26 (1338)  | 85.33             | 84.08         |
| ADJ;FEM;PL      | 40.85 (235)       | 40.34 (238)   | 96.60             | 96.64         |
| ADJ;FEM;SG      | 31.78 (236)       | 31.25 (240)   | 82.63             | 82.08         |
| ADJ;MASC;PL     | 40.68 (236)       | 39.92 (243)   | 96.19             | 96.3          |
| ADJ;MASC;SG     | 35.80 (243)       | 35.39 (243)   | 87.65             | 88.07         |
| 1;COND;PL;V     | 50.00 (2)         | 18.02 (111)   | 100.00            | 86.49         |
| 1;COND;SG;V     | 7.41 (27)         | 4.50 (111)    | 40.74             | 36.94         |
| 1;IMP;PL;POS;V  | 0.00 (22)         | 0.00 (116)    | 13.64             | 7.76          |
| 1;IPFV;PL;PST;V | 7.69 (13)         | 12.61 (111)   | 100.00            | 89.19         |
| 1;IPFV;PST;SG;V | 22.58 (62)        | 18.92 (111)   | 80.65             | 73.87         |
| 1;PFV;PL;PST;V  | 15.38 (26)        | 18.02 (111)   | 69.23             | 72.07         |
| 1;PFV;PST;SG;V  | 11.90 (42)        | 7.21 (111)    | 59.52             | 35.14         |
| 1;PL;PRS;V      | 18.37 (49)        | 20.65 (92)    | 79.59             | 75            |
| 1;PRS;SG;V      | 9.52 (63)         | 8.79 (91)     | 44.44             | 31.87         |
| 2;COND;PL;V     | -                 | 6.31 (111)    | -                 | 27.93         |
| 2;COND;SG;V     | 100.00 (1)        | 2.70 (111)    | 100.00            | 10.81         |
| 2;IMP;PL;POS;V  | 0.00 (17)         | 0.00 (116)    | 11.76             | 4.31          |
| 2;IMP;POS;SG;V  | 21.43 (84)        | 17.24 (116)   | 45.24             | 42.24         |
| 2;IPFV;PL;PST;V | -                 | 0.00 (111)    | -                 | 2.7           |
| 2;IPFV;PST;SG;V | 0.00 (11)         | 1.80 (111)    | 27.27             | 14.41         |
| 2;PFV;PL;PST;V  | -                 | 0.00 (111)    | -                 | 1.8           |
| 2;PFV;PST;SG;V  | 6.67 (15)         | 5.41 (111)    | 66.67             | 45.95         |
| 2;PL;PRS;V      | 0.00 (13)         | 1.09 (92)     | 0.00              | 2.17          |
| 2;PRS;SG;V      | 11.36 (44)        | 5.43 (92)     | 18.18             | 8.7           |
| 3;COND;PL;V     | 0.00 (19)         | 0.00 (111)    | 10.53             | 8.11          |
| 3;COND;SG;V     | 7.89 (38)         | 4.50 (111)    | 36.84             | 36.94         |
| 3;IPFV;PL;PST;V | 13.04 (92)        | 12.61 (111)   | 80.43             | 81.98         |
| 3;IPFV;PST;SG;V | 20.62 (97)        | 18.92 (111)   | 79.38             | 73.87         |
| 3;PFV;PL;PST;V  | 15.38 (91)        | 17.12 (111)   | 90.11             | 89.19         |
| 3;PFV;PST;SG;V  | 6.06 (99)         | 5.41 (111)    | 75.76             | 70.27         |
| 3;PL;PRS;V      | 23.17 (82)        | 21.74 (92)    | 80.49             | 73.91         |
| 3;PRS;SG;V      | 21.59 (88)        | 19.57 (92)    | 53.41             | 50            |
| NFIN;V          | 16.07 (112)       | 15.52 (116)   | 92.86             | 87.07         |
| 1;FUT;PL;V      | 16.67 (12)        | 5.56 (36)     | 91.67             | 44.44         |
| 1;FUT;SG;V      | 0.00 (14)         | 2.78 (36)     | 28.57             | 16.67         |
| 2;FUT;PL;V      | 0.00 (1)          | 0.00 (36)     | 0.00              | 0             |
| 2;FUT;SG;V      | 0.00 (5)          | 0.00 (36)     | 20.00             | 8.33          |
| 3;FUT;PL;V      | 0.00 (17)         | 0.00 (36)     | 64.71             | 58.33         |
| 3;FUT;SG;V      | 0.00 (28)         | 0.00 (36)     | 50.00             | 33.33         |

Table 91: The performance of Artetxe et al. (2017)’s model on translating words belonging to a specific morphological category for the Spanish–Polish language pair (the grey numbers correspond to the dictionary sizes).

| Czech–Polish         |                   |               |                   |               |
|----------------------|-------------------|---------------|-------------------|---------------|
| Morph                | Normal (In vocab) | Normal (+OOV) | Lexeme (In vocab) | Lexeme (+OOV) |
| ALL                  | 51.76 (3161)      | 42.80 (4166)  | 84.02             | 77.65         |
| ACC;ADJ;NEUT;SG      | 57.35 (68)        | 54.93 (71)    | 94.12             | 92.96         |
| ADJ;GEN;PL           | 50.79 (63)        | 46.48 (71)    | 98.41             | 98.59         |
| ADJ;GEN;MASC;SG      | 52.31 (65)        | 47.89 (71)    | 96.92             | 97.18         |
| ADJ;ESS;MASC;SG      | 39.29 (56)        | 32.39 (71)    | 64.29             | 64.79         |
| ADJ;FEM;INS;SG       | 16.67 (6)         | 16.67 (6)     | 66.67             | 66.67         |
| ADJ;NOM;PL           | 16.67 (6)         | 16.67 (6)     | 66.67             | 66.67         |
| ACC;ADJ;FEM;SG       | 55.22 (67)        | 52.11 (71)    | 94.03             | 94.37         |
| ADJ;INS;NEUT;SG      | 20.00 (5)         | 16.67 (6)     | 100               | 100           |
| ADJ;DAT;FEM;SG       | 57.35 (68)        | 54.93 (71)    | 94.12             | 92.96         |
| ADJ;DAT;MASC;SG      | 68.29 (41)        | 49.30 (71)    | 95.12             | 100           |
| ADJ;DAT;PL           | 44.62 (65)        | 40.85 (71)    | 100               | 100           |
| ADJ;ESS;FEM;SG       | 57.35 (68)        | 54.93 (71)    | 94.12             | 92.96         |
| ADJ;INS;MASC;SG      | 44.62 (65)        | 40.85 (71)    | 100               | 100           |
| ADJ;ESS;NEUT;SG      | 49.12 (57)        | 39.44 (71)    | 84.21             | 80.28         |
| ADJ;INS;PL           | 56.36 (55)        | 46.48 (71)    | 100               | 100           |
| ACC;ADJ;PL           | 16.67 (6)         | 16.67 (6)     | 66.67             | 66.67         |
| ADJ;ESS;PL           | 50.79 (63)        | 46.48 (71)    | 98.41             | 98.59         |
| ADJ;FEM;GEN;SG       | 57.35 (68)        | 54.93 (71)    | 94.12             | 92.96         |
| ACC;ADJ;MASC;SG      | 52.31 (65)        | 47.89 (71)    | 96.92             | 97.18         |
| ADJ;GEN;NEUT;SG      | 52.31 (65)        | 47.89 (71)    | 96.92             | 97.18         |
| ADJ;DAT;NEUT;SG      | 68.29 (41)        | 49.30 (71)    | 95.12             | 100           |
| GEN;N;SG             | 56.53 (352)       | 56.62 (355)   | 86.08             | 85.92         |
| ACC;N;PL             | 57.58 (330)       | 55.52 (344)   | 89.09             | 88.08         |
| INS;N;PL             | 62.74 (263)       | 50.58 (346)   | 93.92             | 91.33         |
| DAT;N;SG             | 50.18 (273)       | 45.04 (353)   | 72.53             | 69.69         |
| N;NOM;PL             | 57.96 (333)       | 55.91 (347)   | 89.19             | 87.9          |
| ESS;N;PL             | 62.88 (229)       | 50.14 (345)   | 93.01             | 93.62         |
| N;SG;VOC             | 53.50 (157)       | 34.46 (354)   | 73.25             | 54.24         |
| N;PL;VOC             | 57.83 (332)       | 55.62 (347)   | 89.16             | 87.61         |
| ACC;N;SG             | 53.60 (347)       | 51.83 (355)   | 78.1              | 76.9          |
| INS;N;SG             | 53.23 (325)       | 49.86 (353)   | 85.23             | 84.7          |
| GEN;N;PL             | 53.87 (310)       | 48.85 (348)   | 80.65             | 75.86         |
| ESS;N;SG             | 49.68 (312)       | 45.33 (353)   | 72.12             | 69.97         |
| N;NOM;SG             | 52.96 (355)       | 52.68 (355)   | 79.72             | 79.72         |
| DAT;N;PL             | 51.53 (163)       | 37.57 (346)   | 82.82             | 83.82         |
| ADJ;FEM;NOM;SG       | 54.84 (62)        | 50.77 (65)    | 91.94             | 92.31         |
| ADJ;MASC;NOM;SG      | 58.06 (62)        | 55.38 (65)    | 96.77             | 98.46         |
| ACC;ADJ;INAN;MASC;SG | 58.06 (62)        | 55.38 (65)    | 96.77             | 98.46         |
| ACC;ADJ;MASC;PL      | 61.29 (62)        | 58.46 (65)    | 96.77             | 95.38         |
| ADJ;MASC;NOM;PL      | 44.44 (36)        | 40.00 (65)    | 75                | 63.08         |
| ADJ;NEUT;NOM;SG      | 61.29 (62)        | 58.46 (65)    | 96.77             | 95.38         |
| 3;MASC;PST;SG;V      | 50.00 (38)        | 48.78 (41)    | 89.47             | 85.37         |
| 2;IMP;PL;V           | 0.00 (8)          | 5.00 (40)     | 37.5              | 17.5          |
| 1;PRS;SG;V           | 30.77 (13)        | 8.82 (34)     | 69.23             | 23.53         |
| 3;FEM;PL;PST;V       | 59.26 (27)        | 48.78 (41)    | 92.59             | 87.8          |
| 1;PL;PRS;V           | 28.57 (14)        | 11.76 (34)    | 85.71             | 58.82         |
| 3;PL;PRS;V           | 42.86 (28)        | 35.29 (34)    | 89.29             | 73.53         |
| 3;MASC;PL;PST;V      | 38.71 (31)        | 36.59 (41)    | 96.77             | 92.68         |
| 3;NEUT;PST;SG;V      | 66.67 (27)        | 51.22 (41)    | 96.3              | 95.12         |
| NFIN;V               | 35.56 (45)        | 34.78 (46)    | 95.56             | 93.48         |
| 2;PL;PRS;V           | 0.00 (5)          | 0.00 (34)     | 0                 | 0             |
| 3;PRS;SG;V           | 40.62 (32)        | 38.24 (34)    | 75                | 67.65         |
| 3;FEM;PST;SG;V       | 51.52 (33)        | 48.78 (41)    | 93.94             | 87.8          |
| 2;PRS;SG;V           | 14.29 (7)         | 8.82 (34)     | 57.14             | 26.47         |
| 2;IMP;SG;V           | 7.69 (13)         | 12.50 (40)    | 23.08             | 22.5          |
| 1;IMP;PL;V           | 33.33 (3)         | 5.00 (40)     | 66.67             | 20            |
| 2;FUT;PL;V           | 0.00 (1)          | 11.11 (9)     | 0                 | 11.11         |
| 1;FUT;SG;V           | 0.00 (5)          | 0.00 (9)      | 20                | 11.11         |
| 3;FUT;PL;V           | 0.00 (7)          | 0.00 (9)      | 42.86             | 44.44         |
| 1;FUT;PL;V           | 0.00 (3)          | 11.11 (9)     | 33.33             | 77.78         |
| 2;FUT;SG;V           | 0.00 (1)          | 0.00 (9)      | 100               | 0             |
| 3;FUT;SG;V           | 11.11 (9)         | 11.11 (9)     | 55.56             | 55.56         |

Table 92: The performance of [Ruder et al. \(2018\)](#)’s model on translating words belonging to a specific morphological category for the Czech–Polish language pair (the grey numbers correspond to the dictionary sizes).

| Czech–Russian        |                   |               |                   |               |
|----------------------|-------------------|---------------|-------------------|---------------|
| Morph                | Normal (In vocab) | Normal (+OOV) | Lexeme (In vocab) | Lexeme (+OOV) |
| ALL                  | 45.48 (3562)      | 38.64 (4762)  | 84.95             | 80.85         |
| GEN;N;PL             | 45.83 (312)       | 40.82 (365)   | 76.28             | 70.96         |
| GEN;N;SG             | 50.96 (365)       | 50.13 (373)   | 85.75             | 84.45         |
| DAT;N;PL             | 52.94 (187)       | 41.64 (365)   | 94.12             | 91.78         |
| INS;N;SG             | 50.00 (324)       | 46.11 (373)   | 87.35             | 84.18         |
| ACC;N;PL             | 50.67 (225)       | 47.98 (248)   | 83.11             | 79.44         |
| N;NOM;PL             | 52.54 (335)       | 49.45 (362)   | 86.87             | 83.15         |
| N;NOM;SG             | 46.59 (367)       | 46.09 (371)   | 77.11             | 76.55         |
| DAT;N;SG             | 46.62 (311)       | 41.29 (373)   | 77.49             | 71.85         |
| ESS;N;SG             | 46.15 (312)       | 40.75 (373)   | 77.24             | 71.58         |
| INS;N;PL             | 49.22 (256)       | 40.00 (365)   | 85.55             | 83.56         |
| ESS;N;PL             | 48.08 (208)       | 39.73 (365)   | 93.27             | 92.88         |
| ACC;N;SG             | 45.60 (364)       | 44.50 (373)   | 77.2              | 75.87         |
| ADJ;DAT;MASC;SG      | 66.67 (57)        | 56.63 (83)    | 98.25             | 98.8          |
| ADJ;NEUT;NOM;SG      | 32.39 (71)        | 29.73 (74)    | 43.66             | 43.24         |
| ADJ;FEM;GEN;SG       | 29.63 (81)        | 27.71 (83)    | 45.68             | 44.58         |
| ACC;ADJ;INAN;MASC;SG | 59.72 (72)        | 58.11 (74)    | 94.44             | 93.24         |
| ADJ;INS;PL           | 65.22 (69)        | 60.24 (83)    | 100               | 100           |
| ADJ;ESS;PL           | 59.74 (77)        | 56.63 (83)    | 100               | 100           |
| ADJ;FEM;NOM;SG       | 62.50 (72)        | 62.16 (74)    | 94.44             | 94.59         |
| ADJ;DAT;PL           | 64.94 (77)        | 62.65 (83)    | 100               | 100           |
| ADJ;ESS;FEM;SG       | 29.63 (81)        | 27.71 (83)    | 45.68             | 44.58         |
| ADJ;DAT;NEUT;SG      | 66.67 (57)        | 56.63 (83)    | 98.25             | 98.8          |
| ADJ;GEN;PL           | 59.74 (77)        | 56.63 (83)    | 100               | 100           |
| ADJ;MASC;NOM;SG      | 59.72 (72)        | 58.11 (74)    | 94.44             | 93.24         |
| ADJ;GEN;MASC;SG      | 58.23 (79)        | 56.63 (83)    | 100               | 100           |
| ACC;ADJ;NEUT;SG      | 30.00 (80)        | 27.71 (83)    | 45                | 44.58         |
| ACC;ADJ;MASC;SG      | 58.23 (79)        | 56.63 (83)    | 100               | 100           |
| ADJ;GEN;NEUT;SG      | 58.23 (79)        | 56.63 (83)    | 100               | 100           |
| ADJ;DAT;FEM;SG       | 29.63 (81)        | 27.71 (83)    | 45.68             | 44.58         |
| ADJ;INS;MASC;SG      | 64.94 (77)        | 62.65 (83)    | 100               | 100           |
| ACC;ADJ;FEM;SG       | 57.50 (80)        | 56.63 (83)    | 92.5              | 92.77         |
| ADJ;ESS;MASC;SG      | 59.15 (71)        | 56.63 (83)    | 100               | 100           |
| ADJ;ESS;NEUT;SG      | 61.11 (72)        | 57.83 (83)    | 100               | 100           |
| 3;PRS;SG;V           | 27.78 (54)        | 26.79 (56)    | 94.44             | 89.29         |
| 2;PRS;SG;V           | 0.00 (7)          | 14.29 (56)    | 28.57             | 55.36         |
| 2;IMP;PL;V           | 17.65 (17)        | 12.99 (77)    | 94.12             | 71.43         |
| 1;PRS;SG;V           | 15.38 (13)        | 17.86 (56)    | 61.54             | 39.29         |
| 3;FEM;PST;SG;V       | 29.51 (61)        | 25.00 (80)    | 96.72             | 96.25         |
| 1;PL;PRS;V           | 21.43 (14)        | 14.29 (56)    | 71.43             | 64.29         |
| 3;NEUT;PST;SG;V      | 21.43 (42)        | 18.75 (80)    | 92.86             | 95            |
| 2;PL;PRS;V           | 27.27 (11)        | 17.86 (56)    | 81.82             | 82.14         |
| 3;MASC;PST;SG;V      | 28.57 (70)        | 27.50 (80)    | 90                | 85            |
| 3;PL;PRS;V           | 35.00 (40)        | 25.00 (56)    | 92.5              | 69.64         |
| NFIN;V               | 31.73 (104)       | 28.45 (116)   | 99.04             | 99.14         |
| 3;MASC;PL;PST;V      | 25.00 (60)        | 25.00 (80)    | 98.33             | 97.5          |
| 2;IMP;SG;V           | 13.33 (15)        | 7.79 (77)     | 20                | 22.08         |
| 3;FEM;PL;PST;V       | 8.93 (56)         | 8.75 (80)     | 80.36             | 75            |
| ADJ;FEM;INS;SG       | 11.11 (9)         | 11.11 (9)     | 55.56             | 55.56         |
| ADJ;NOM;PL           | 11.11 (9)         | 11.11 (9)     | 55.56             | 55.56         |
| ADJ;INS;NEUT;SG      | 33.33 (9)         | 33.33 (9)     | 100               | 100           |
| ACC;ADJ;PL           | 11.11 (9)         | 11.11 (9)     | 55.56             | 55.56         |
| 1;FUT;PL;V           | 0.00 (6)          | 3.85 (26)     | 0                 | 26.92         |
| 3;FUT;SG;V           | 9.52 (21)         | 7.69 (26)     | 80.95             | 69.23         |
| 2;FUT;PL;V           | 0.00 (7)          | 3.85 (26)     | 100               | 65.38         |
| 1;FUT;SG;V           | 0.00 (7)          | 0.00 (25)     | 14.29             | 8             |
| 2;FUT;SG;V           | 0.00 (2)          | 7.69 (26)     | 50                | 38.46         |
| 3;FUT;PL;V           | 10.53 (19)        | 7.69 (26)     | 78.95             | 69.23         |
| ACC;INAN;N;SG        | 50.00 (2)         | 50.00 (2)     | 50                | 50            |
| ACC;INAN;N;PL        | 0.00 (2)          | 0.00 (2)      | 50                | 50            |

Table 93: The performance of [Ruder et al. \(2018\)](#)’s model on translating words belonging to a specific morphological category for the Czech–Russian language pair (the grey numbers correspond to the dictionary sizes).



| Czech–Slovak         |                   |               |                   |               |
|----------------------|-------------------|---------------|-------------------|---------------|
| Morph                | Normal (In vocab) | Normal (+OOV) | Lexeme (In vocab) | Lexeme (+OOV) |
| ALL                  | 61.47 (802)       | 54.04 (1027)  | 89.90             | 87.34         |
| ADJ;INS;MASC;SG      | 60.00 (10)        | 72.73 (11)    | 100.00            | 100           |
| ADJ;ESS;PL           | 63.64 (11)        | 63.64 (11)    | 100.00            | 100           |
| ADJ;DAT;NEUT;SG      | 75.00 (8)         | 81.82 (11)    | 100.00            | 100           |
| ADJ;ESS;FEM;SG       | 72.73 (11)        | 72.73 (11)    | 100.00            | 100           |
| ACC;ADJ;MASC;PL      | 72.73 (11)        | 72.73 (11)    | 100.00            | 100           |
| ADJ;MASC;NOM;SG      | 81.82 (11)        | 81.82 (11)    | 100.00            | 100           |
| ADJ;ESS;MASC;SG      | 62.50 (8)         | 54.55 (11)    | 87.50             | 72.73         |
| ADJ;GEN;NEUT;SG      | 72.73 (11)        | 72.73 (11)    | 100.00            | 100           |
| ADJ;DAT;PL           | 60.00 (10)        | 72.73 (11)    | 100.00            | 100           |
| ADJ;MASC;NOM;PL      | 71.43 (7)         | 63.64 (11)    | 100.00            | 90.91         |
| ACC;ADJ;INAN;MASC;SG | 81.82 (11)        | 81.82 (11)    | 100.00            | 100           |
| ADJ;GEN;MASC;SG      | 72.73 (11)        | 72.73 (11)    | 100.00            | 100           |
| ACC;ADJ;MASC;SG      | 72.73 (11)        | 72.73 (11)    | 100.00            | 100           |
| ACC;ADJ;NEUT;SG      | 72.73 (11)        | 72.73 (11)    | 100.00            | 100           |
| ADJ;ESS;NEUT;SG      | 75.00 (8)         | 72.73 (11)    | 100.00            | 100           |
| ADJ;NEUT;NOM;SG      | 72.73 (11)        | 72.73 (11)    | 100.00            | 100           |
| ADJ;INS;PL           | 75.00 (8)         | 81.82 (11)    | 100.00            | 100           |
| ADJ;GEN;PL           | 63.64 (11)        | 63.64 (11)    | 100.00            | 100           |
| ADJ;FEM;NOM;SG       | 81.82 (11)        | 81.82 (11)    | 100.00            | 100           |
| ADJ;DAT;MASC;SG      | 75.00 (8)         | 81.82 (11)    | 100.00            | 100           |
| ADJ;FEM;GEN;SG       | 72.73 (11)        | 72.73 (11)    | 100.00            | 100           |
| ADJ;DAT;FEM;SG       | 72.73 (11)        | 72.73 (11)    | 100.00            | 100           |
| ACC;ADJ;FEM;SG       | 45.45 (11)        | 36.36 (11)    | 90.91             | 72.73         |
| GEN;N;SG             | 64.95 (97)        | 63.37 (101)   | 85.57             | 87.13         |
| N;NOM;PL             | 64.13 (92)        | 61.54 (104)   | 88.04             | 84.62         |
| INS;N;SG             | 66.67 (84)        | 58.42 (101)   | 91.67             | 90.1          |
| N;NOM;SG             | 66.67 (99)        | 65.35 (101)   | 86.87             | 87.13         |
| ACC;N;SG             | 65.26 (95)        | 63.37 (101)   | 89.47             | 88.12         |
| ACC;N;PL             | 61.70 (94)        | 61.54 (104)   | 85.11             | 87.5          |
| DAT;N;SG             | 56.94 (72)        | 50.50 (101)   | 76.39             | 72.28         |
| INS;N;PL             | 61.67 (60)        | 49.51 (103)   | 90.00             | 89.32         |
| DAT;N;PL             | 41.18 (51)        | 30.10 (103)   | 84.31             | 83.5          |
| ESS;N;SG             | 58.67 (75)        | 51.49 (101)   | 78.67             | 73.27         |
| ESS;N;PL             | 63.64 (55)        | 49.51 (103)   | 98.18             | 96.12         |
| GEN;N;PL             | 53.49 (86)        | 49.04 (104)   | 83.72             | 79.81         |
| NFIN;V               | 61.90 (84)        | 58.95 (95)    | 100.00            | 100           |
| 3;FEM;PL;PST;V       | 0.00 (1)          | 0.00 (1)      | 100.00            | 100           |
| 1;PRS;SG;V           | -                 | 0.00 (1)      | -                 | 100           |
| 3;MASC;PL;PST;V      | 0.00 (1)          | 0.00 (1)      | 100.00            | 100           |
| 3;NEUT;PST;SG;V      | 0.00 (1)          | 0.00 (1)      | 100.00            | 100           |
| 3;MASC;PST;SG;V      | 0.00 (1)          | 0.00 (1)      | 100.00            | 100           |
| 1;PL;PRS;V           | 0.00 (1)          | 0.00 (1)      | 100.00            | 100           |
| 1;IMP;PL;V           | -                 | 0.00 (1)      | -                 | 0             |
| 3;FEM;PST;SG;V       | 0.00 (1)          | 0.00 (1)      | 100.00            | 100           |
| 2;IMP;PL;V           | -                 | 0.00 (1)      | -                 | 100           |
| 3;PRS;SG;V           | 0.00 (1)          | 0.00 (1)      | 100.00            | 100           |
| 2;IMP;SG;V           | -                 | 0.00 (1)      | -                 | 100           |
| 2;PL;PRS;V           | -                 | 0.00 (1)      | -                 | 0             |
| 2;PRS;SG;V           | -                 | 0.00 (1)      | -                 | 0             |
| 3;NEUT;PL;PST;V      | 0.00 (1)          | 0.00 (1)      | 100.00            | 100           |
| 3;PL;PRS;V           | 0.00 (1)          | 0.00 (1)      | 0.00              | 0             |

Table 94: The performance of [Ruder et al. \(2018\)](#)’s model on translating words belonging to a specific morphological category for the Czech–Slovak language pair (the grey numbers correspond to the dictionary sizes).

| Czech–Ukrainian      |                   |               |                   |               |
|----------------------|-------------------|---------------|-------------------|---------------|
| Morph                | Normal (In vocab) | Normal (+OOV) | Lexeme (In vocab) | Lexeme (+OOV) |
| ALL                  | 48.44 (673)       | 39.93 (854)   | 83.51             | 79.98         |
| ACC;N;SG             | 51.11 (90)        | 48.42 (95)    | 83.33             | 81.05         |
| N;PL;VOC             | 50.56 (89)        | 47.87 (94)    | 82.02             | 80.85         |
| N;SG;VOC             | 42.86 (35)        | 23.40 (94)    | 77.14             | 56.38         |
| DAT;N;PL             | 57.89 (57)        | 42.55 (94)    | 96.49             | 95.74         |
| N;NOM;SG             | 53.19 (94)        | 52.63 (95)    | 87.23             | 85.26         |
| INS;N;SG             | 56.63 (83)        | 49.47 (95)    | 86.75             | 85.26         |
| ACC;N;PL             | 54.44 (90)        | 52.13 (94)    | 81.11             | 81.91         |
| INS;N;PL             | 47.37 (76)        | 39.36 (94)    | 89.47             | 88.3          |
| GEN;N;SG             | 54.95 (91)        | 52.63 (95)    | 83.52             | 83.16         |
| GEN;N;PL             | 54.12 (85)        | 48.42 (95)    | 83.53             | 81.05         |
| N;NOM;PL             | 50.00 (90)        | 47.87 (94)    | 81.11             | 80.85         |
| ESS;N;SG             | 40.24 (82)        | 34.74 (95)    | 74.39             | 68.42         |
| DAT;N;SG             | 38.75 (80)        | 32.63 (95)    | 73.75             | 67.37         |
| ESS;N;PL             | 55.00 (60)        | 39.36 (94)    | 86.67             | 89.36         |
| 3;PL;PRS;V           | 50.00 (2)         | 33.33 (3)     | 50                | 33.33         |
| 3;PRS;SG;V           | 33.33 (3)         | 33.33 (3)     | 100               | 100           |
| 1;PRS;SG;V           | 50.00 (2)         | 33.33 (3)     | 100               | 66.67         |
| 3;NEUT;PST;SG;V      | 0.00 (2)          | 0.00 (3)      | 100               | 100           |
| 3;FEM;PST;SG;V       | 66.67 (3)         | 66.67 (3)     | 100               | 100           |
| 3;FEM;PL;PST;V       | 0.00 (3)          | 0.00 (3)      | 0                 | 0             |
| NFIN;V               | 33.33 (3)         | 33.33 (3)     | 100               | 100           |
| 3;MASC;PL;PST;V      | 0.00 (3)          | 0.00 (3)      | 66.67             | 66.67         |
| 2;IMP;SG;V           | 0.00 (3)          | 0.00 (3)      | 33.33             | 33.33         |
| 2;PL;PRS;V           | 0.00 (2)          | 0.00 (3)      | 100               | 66.67         |
| 2;PRS;SG;V           | 0.00 (2)          | 0.00 (3)      | 50                | 33.33         |
| 2;IMP;PL;V           | 0.00 (3)          | 0.00 (3)      | 100               | 100           |
| 1;PL;PRS;V           | 0.00 (2)          | 0.00 (3)      | 100               | 100           |
| 1;IMP;PL;V           | 0.00 (1)          | 0.00 (3)      | 0                 | 0             |
| 3;MASC;PST;SG;V      | 50.00 (2)         | 50.00 (2)     | 100               | 100           |
| ADJ;FEM;GEN;SG       | 0.00 (1)          | 0.00 (1)      | 100               | 100           |
| ADJ;GEN;NEUT;SG      | 0.00 (1)          | 0.00 (1)      | 100               | 100           |
| ADJ;DAT;PL           | 0.00 (1)          | 0.00 (1)      | 100               | 100           |
| ADJ;ESS;PL           | 0.00 (1)          | 0.00 (1)      | 100               | 100           |
| ACC;ADJ;MASC;SG      | 0.00 (1)          | 0.00 (1)      | 100               | 100           |
| ACC;ADJ;NEUT;SG      | 0.00 (1)          | 0.00 (1)      | 100               | 100           |
| ADJ;GEN;PL           | 0.00 (1)          | 0.00 (1)      | 100               | 100           |
| ADJ;INS;MASC;SG      | 0.00 (1)          | 0.00 (1)      | 100               | 100           |
| ACC;ADJ;FEM;SG       | 0.00 (1)          | 0.00 (1)      | 100               | 100           |
| ACC;ADJ;INAN;MASC;SG | 0.00 (1)          | 0.00 (1)      | 100               | 100           |
| ADJ;MASC;NOM;SG      | 0.00 (1)          | 0.00 (1)      | 100               | 100           |
| ADJ;DAT;FEM;SG       | 0.00 (1)          | 0.00 (1)      | 100               | 100           |
| ADJ;NEUT;NOM;SG      | 0.00 (1)          | 0.00 (1)      | 100               | 100           |
| ADJ;ESS;NEUT;SG      | 0.00 (1)          | 0.00 (1)      | 100               | 100           |
| ADJ;FEM;NOM;SG       | 0.00 (1)          | 0.00 (1)      | 100               | 100           |
| ADJ;DAT;NEUT;SG      | 0.00 (1)          | 0.00 (1)      | 0                 | 0             |
| ADJ;INS;PL           | 0.00 (1)          | 0.00 (1)      | 100               | 100           |
| ADJ;DAT;MASC;SG      | 0.00 (1)          | 0.00 (1)      | 0                 | 0             |
| ADJ;GEN;MASC;SG      | 0.00 (1)          | 0.00 (1)      | 100               | 100           |
| ADJ;ESS;MASC;SG      | 0.00 (1)          | 0.00 (1)      | 100               | 100           |
| ADJ;ESS;FEM;SG       | 0.00 (1)          | 0.00 (1)      | 100               | 100           |

Table 95: The performance of [Ruder et al. \(2018\)](#)’s model on translating words belonging to a specific morphological category for the Czech–Ukrainian language pair (the grey numbers correspond to the dictionary sizes).

| Polish–Czech         |                   |               |                   |               |
|----------------------|-------------------|---------------|-------------------|---------------|
| Morph                | Normal (In vocab) | Normal (+OOV) | Lexeme (In vocab) | Lexeme (+OOV) |
| ALL                  | 42.05 (4043)      | 34.81 (5332)  | 80.63             | 75.34         |
| DAT;N;SG             | 26.07 (280)       | 18.74 (427)   | 58.93             | 44.73         |
| N;NOM;PL             | 44.59 (388)       | 41.49 (417)   | 81.44             | 78.42         |
| GEN;N;SG             | 45.41 (414)       | 43.79 (427)   | 82.13             | 79.39         |
| ESS;N;PL             | 52.94 (255)       | 38.94 (416)   | 90.98             | 91.11         |
| N;SG;VOC             | 33.69 (187)       | 24.12 (427)   | 58.29             | 49.41         |
| N;PL;VOC             | 44.59 (388)       | 41.49 (417)   | 81.44             | 78.42         |
| ESS;N;SG             | 32.74 (336)       | 27.76 (425)   | 58.63             | 53.18         |
| DAT;N;PL             | 48.35 (182)       | 32.21 (416)   | 95.05             | 93.03         |
| GEN;N;PL             | 44.02 (368)       | 39.23 (418)   | 81.25             | 76.32         |
| ACC;N;PL             | 44.92 (394)       | 42.34 (418)   | 81.47             | 79.43         |
| INS;N;PL             | 29.52 (315)       | 23.80 (416)   | 80.95             | 80.77         |
| INS;N;SG             | 44.26 (366)       | 38.97 (426)   | 83.06             | 82.63         |
| ACC;N;SG             | 44.83 (406)       | 42.62 (427)   | 77.83             | 75.41         |
| N;NOM;SG             | 45.97 (422)       | 45.43 (427)   | 81.75             | 80.09         |
| ACC;ADJ;MASC;SG      | 47.83 (69)        | 47.83 (69)    | 98.55             | 98.55         |
| ACC;ADJ;FEM;SG       | 46.97 (66)        | 46.38 (69)    | 100               | 100           |
| ADJ;ESS;MASC;SG      | 49.18 (61)        | 49.28 (69)    | 96.72             | 97.1          |
| ADJ;INS;MASC;SG      | 48.48 (66)        | 49.28 (69)    | 96.97             | 97.1          |
| ADJ;MASC;NOM;SG      | 54.55 (66)        | 55.22 (67)    | 95.45             | 95.52         |
| ADJ;FEM;NOM;SG       | 52.31 (65)        | 53.73 (67)    | 93.85             | 94.03         |
| ADJ;NEUT;NOM;SG      | 53.73 (67)        | 53.73 (67)    | 98.51             | 98.51         |
| ADJ;DAT;MASC;SG      | 53.12 (32)        | 46.38 (69)    | 100               | 100           |
| ADJ;GEN;NEUT;SG      | 47.83 (69)        | 47.83 (69)    | 98.55             | 98.55         |
| ADJ;GEN;MASC;SG      | 47.83 (69)        | 47.83 (69)    | 98.55             | 98.55         |
| ADJ;MASC;NOM;PL      | 39.53 (43)        | 31.34 (67)    | 76.74             | 68.66         |
| ADJ;ESS;NEUT;SG      | 49.18 (61)        | 49.28 (69)    | 96.72             | 97.1          |
| ADJ;FEM;GEN;SG       | 41.79 (67)        | 42.03 (69)    | 71.64             | 69.57         |
| ADJ;ESS;FEM;SG       | 41.79 (67)        | 42.03 (69)    | 71.64             | 69.57         |
| ADJ;ESS;PL           | 43.28 (67)        | 44.93 (69)    | 100               | 100           |
| ACC;ADJ;INAN;MASC;SG | 54.55 (66)        | 55.22 (67)    | 95.45             | 95.52         |
| ACC;ADJ;MASC;PL      | 43.28 (67)        | 46.27 (67)    | 100               | 100           |
| ADJ;DAT;FEM;SG       | 41.79 (67)        | 42.03 (69)    | 71.64             | 69.57         |
| ACC;ADJ;NEUT;SG      | 52.17 (69)        | 52.17 (69)    | 98.55             | 97.1          |
| ADJ;GEN;PL           | 43.28 (67)        | 44.93 (69)    | 100               | 100           |
| ADJ;INS;PL           | 47.37 (57)        | 43.48 (69)    | 100               | 100           |
| ADJ;DAT;NEUT;SG      | 53.12 (32)        | 46.38 (69)    | 100               | 100           |
| ADJ;DAT;PL           | 48.48 (66)        | 49.28 (69)    | 96.97             | 97.1          |
| 3;MASC;PST;SG;V      | 57.58 (33)        | 52.78 (36)    | 90.91             | 91.67         |
| 3;FEM;PST;SG;V       | 60.00 (30)        | 51.35 (37)    | 86.67             | 86.49         |
| 3;PL;PRS;V           | 40.00 (20)        | 32.00 (25)    | 80                | 76            |
| 2;PRS;SG;V           | 44.44 (9)         | 28.00 (25)    | 55.56             | 56            |
| 2;IMP;SG;V           | 11.11 (18)        | 2.70 (37)     | 16.67             | 2.7           |
| 2;IMP;PL;V           | 11.11 (9)         | 8.11 (37)     | 55.56             | 35.14         |
| 3;NEUT;PST;SG;V      | 73.08 (26)        | 56.76 (37)    | 92.31             | 86.49         |
| 1;IMP;PL;V           | 0.00 (5)          | 0.00 (37)     | 0                 | 5.41          |
| 2;PL;PRS;V           | 0.00 (4)          | 0.00 (25)     | 0                 | 24            |
| NFIN;V               | 47.37 (38)        | 45.00 (40)    | 94.74             | 95            |
| 3;PRS;SG;V           | 37.50 (24)        | 36.00 (25)    | 79.17             | 76            |
| 3;MASC;PL;PST;V      | 59.38 (32)        | 51.35 (37)    | 96.88             | 94.59         |
| 3;FEM;PL;PST;V       | 56.52 (23)        | 40.54 (37)    | 95.65             | 94.59         |
| 1;PL;PRS;V           | 40.00 (10)        | 16.00 (25)    | 90                | 52            |
| 1;PRS;SG;V           | 21.43 (14)        | 16.00 (25)    | 50                | 36            |
| ACC;ADJ;PL           | 0.00 (5)          | 0.00 (5)      | 100               | 80            |
| ADJ;INS;NEUT;SG      | 0.00 (5)          | 0.00 (5)      | 100               | 100           |
| ADJ;FEM;INS;SG       | 0.00 (5)          | 0.00 (5)      | 100               | 100           |
| ADJ;NOM;PL           | 0.00 (5)          | 0.00 (5)      | 100               | 80            |
| 3;FUT;SG;V           | 50.00 (10)        | 30.77 (13)    | 70                | 46.15         |
| 1;FUT;PL;V           | 50.00 (8)         | 23.08 (13)    | 62.5              | 38.46         |
| 2;FUT;SG;V           | 0.00 (3)          | 15.38 (13)    | 33.33             | 38.46         |
| 2;FUT;PL;V           | 0.00 (3)          | 7.69 (13)     | 0                 | 23.08         |
| 1;FUT;SG;V           | 25.00 (8)         | 15.38 (13)    | 75                | 38.46         |
| 3;FUT;PL;V           | 44.44 (9)         | 23.08 (13)    | 66.67             | 53.85         |

Table 96: The performance of [Ruder et al. \(2018\)](#)’s model on translating words belonging to a specific morphological category for the Polish–Czech language pair (the grey numbers correspond to the dictionary sizes).

| Polish–Russian       |                   |               |                   |               |
|----------------------|-------------------|---------------|-------------------|---------------|
| Morph                | Normal (In vocab) | Normal (+OOV) | Lexeme (In vocab) | Lexeme (+OOV) |
| ALL                  | 47.37 (6814)      | 40.32 (9079)  | 83.56             | 80.24         |
| N;NOM;SG             | 42.97 (768)       | 41.86 (786)   | 77.08             | 75.32         |
| ACC;N;SG             | 42.38 (748)       | 40.46 (791)   | 76.60             | 74.46         |
| DAT;N;SG             | 37.25 (459)       | 28.35 (790)   | 78.43             | 71.27         |
| INS;N;SG             | 46.80 (688)       | 42.21 (789)   | 85.90             | 84.41         |
| ESS;N;SG             | 41.41 (611)       | 36.39 (786)   | 73.81             | 67.56         |
| GEN;N;SG             | 47.54 (753)       | 45.88 (789)   | 82.87             | 81.5          |
| ADJ;INS;PL           | 63.91 (133)       | 60.40 (149)   | 100.00            | 100           |
| ADJ;FEM;INS;SG       | 58.33 (144)       | 56.38 (149)   | 95.14             | 95.97         |
| ADJ;FEM;NOM;SG       | 59.03 (144)       | 56.38 (149)   | 89.58             | 89.26         |
| ADJ;DAT;FEM;SG       | 54.86 (144)       | 53.02 (149)   | 95.83             | 95.3          |
| ADJ;ESS;MASC;SG      | 63.04 (138)       | 59.73 (149)   | 99.28             | 98.66         |
| ADJ;INS;MASC;SG      | 61.11 (144)       | 59.73 (149)   | 99.31             | 98.66         |
| ADJ;NEUT;NOM;SG      | 61.70 (141)       | 58.39 (149)   | 92.20             | 91.28         |
| ADJ;DAT;PL           | 61.11 (144)       | 59.73 (149)   | 99.31             | 98.66         |
| ADJ;ESS;NEUT;SG      | 63.04 (138)       | 59.73 (149)   | 99.28             | 98.66         |
| ADJ;GEN;PL           | 62.07 (145)       | 60.40 (149)   | 97.93             | 97.32         |
| ADJ;DAT;NEUT;SG      | 48.72 (78)        | 44.97 (149)   | 100.00            | 99.33         |
| ACC;ADJ;FEM;SG       | 59.15 (142)       | 56.38 (149)   | 96.48             | 95.97         |
| ADJ;GEN;MASC;SG      | 62.50 (144)       | 60.40 (149)   | 97.92             | 96.64         |
| ACC;ADJ;MASC;SG      | 62.50 (144)       | 60.40 (149)   | 97.92             | 96.64         |
| ADJ;FEM;GEN;SG       | 54.86 (144)       | 53.02 (149)   | 95.83             | 95.3          |
| ACC;ADJ;INAN;MASC;SG | 56.94 (144)       | 55.70 (149)   | 88.89             | 87.92         |
| ADJ;INS;NEUT;SG      | 61.11 (144)       | 59.73 (149)   | 99.31             | 98.66         |
| ADJ;MASC;NOM;SG      | 56.94 (144)       | 55.70 (149)   | 88.89             | 87.92         |
| ADJ;NOM;PL           | 60.42 (144)       | 58.39 (149)   | 92.36             | 91.28         |
| ACC;ADJ;PL           | 59.59 (146)       | 58.39 (149)   | 91.78             | 91.28         |
| ADJ;DAT;MASC;SG      | 48.72 (78)        | 44.97 (149)   | 100.00            | 99.33         |
| ADJ;ESS;PL           | 62.07 (145)       | 60.40 (149)   | 97.93             | 97.32         |
| ACC;ADJ;NEUT;SG      | 61.70 (141)       | 58.39 (149)   | 92.20             | 91.28         |
| ADJ;GEN;NEUT;SG      | 62.50 (144)       | 60.40 (149)   | 97.92             | 96.64         |
| ADJ;ESS;FEM;SG       | 54.86 (144)       | 53.02 (149)   | 95.83             | 95.3          |
| INS;N;PL             | 51.67 (480)       | 42.19 (723)   | 97.71             | 98.62         |
| N;NOM;PL             | 45.67 (670)       | 43.69 (721)   | 79.55             | 78.22         |
| DAT;N;PL             | 46.67 (240)       | 31.67 (723)   | 80.00             | 80.64         |
| ACC;N;PL             | 46.77 (511)       | 44.19 (559)   | 81.21             | 79.43         |
| GEN;N;PL             | 46.80 (641)       | 42.72 (728)   | 78.47             | 74.73         |
| ESS;N;PL             | 57.65 (425)       | 46.06 (723)   | 93.65             | 93.78         |
| NFIN;V               | 44.44 (27)        | 43.33 (30)    | 100.00            | 100           |
| 3;FEM;PL;PST;V       | 4.76 (21)         | 6.45 (31)     | 80.95             | 80.65         |
| 2;IMP;PL;V           | 0.00 (5)          | 3.23 (31)     | 100.00            | 41.94         |
| 2;FEM;PST;SG;V       | 0.00 (1)          | 0.00 (31)     | 0.00              | 12.9          |
| 3;NEUT;PST;SG;V      | 25.00 (16)        | 25.81 (31)    | 75.00             | 90.32         |
| 3;MASC;PL;PST;V      | 32.00 (25)        | 32.26 (31)    | 84.00             | 87.1          |
| 1;FEM;PST;SG;V       | 0.00 (9)          | 0.00 (31)     | 22.22             | 3.23          |
| 3;MASC;PST;SG;V      | 36.00 (25)        | 32.26 (31)    | 92.00             | 83.87         |
| 2;MASC;PL;PST;V      | 0.00 (1)          | 6.45 (31)     | 0.00              | 51.61         |
| 2;IMP;SG;V           | 11.76 (17)        | 3.23 (31)     | 23.53             | 16.13         |
| 2;PRS;SG;V           | 20.00 (5)         | 9.52 (21)     | 20.00             | 38.1          |
| 2;PL;PRS;V           | 0.00 (3)          | 0.00 (21)     | 100.00            | 38.1          |
| 3;PL;PRS;V           | 41.18 (17)        | 28.57 (21)    | 94.12             | 95.24         |
| 3;FEM;PST;SG;V       | 34.62 (26)        | 35.48 (31)    | 84.62             | 90.32         |
| 1;PL;PRS;V           | 37.50 (8)         | 14.29 (21)    | 62.50             | 47.62         |
| 3;PRS;SG;V           | 19.05 (21)        | 19.05 (21)    | 80.95             | 80.95         |
| 1;PRS;SG;V           | 25.00 (12)        | 23.81 (21)    | 50.00             | 57.14         |
| 1;MASC;PL;PST;V      | 14.29 (7)         | 6.45 (31)     | 14.29             | 12.9          |
| 1;MASC;PST;SG;V      | 0.00 (16)         | 0.00 (31)     | 0.00              | 3.23          |
| 1;FEM;PL;PST;V       | -                 | 22.58 (31)    | -                 | 70.97         |
| 2;MASC;PST;SG;V      | 0.00 (10)         | 0.00 (31)     | 0.00              | 0             |
| 2;FEM;PL;PST;V       | -                 | 19.35 (31)    | -                 | 51.61         |
| 2;FUT;PL;V           | 0.00 (1)          | 0.00 (10)     | 100.00            | 40            |
| 1;FUT;PL;V           | 33.33 (3)         | 10.00 (10)    | 33.33             | 20            |
| 1;FUT;SG;V           | 0.00 (4)          | 0.00 (10)     | 0.00              | 20            |
| 2;FUT;SG;V           | 0.00 (1)          | 0.00 (10)     | 0.00              | 40            |
| 3;FUT;SG;V           | 0.00 (8)          | 0.00 (10)     | 75.00             | 60            |
| 3;FUT;PL;V           | 12.50 (8)         | 10.00 (10)    | 62.50             | 50            |

Table 97: The performance of [Ruder et al. \(2018\)](#)’s model on translating words belonging to a specific morphological category for the Polish–Russian language pair (the grey numbers correspond to the dictionary sizes).

| Polish–Slovak        |                   |               |                   |               |
|----------------------|-------------------|---------------|-------------------|---------------|
| Morph                | Normal (In vocab) | Normal (+OOV) | Lexeme (In vocab) | Lexeme (+OOV) |
| ALL                  | 35.83 (1217)      | 28.54 (1689)  | 80.28             | 77.5          |
| INS;N;SG             | 35.77 (123)       | 28.66 (157)   | 87.80             | 85.99         |
| N;NOM;SG             | 34.42 (154)       | 33.76 (157)   | 74.68             | 71.97         |
| GEN;N;SG             | 29.17 (144)       | 27.39 (157)   | 73.61             | 71.97         |
| DAT;N;SG             | 26.37 (91)        | 16.56 (157)   | 68.13             | 56.69         |
| ACC;N;PL             | 30.15 (136)       | 26.92 (156)   | 75.74             | 73.08         |
| INS;N;PL             | 40.45 (89)        | 28.21 (156)   | 100.00            | 99.36         |
| DAT;N;PL             | 23.53 (68)        | 15.38 (156)   | 66.18             | 69.23         |
| N;NOM;PL             | 29.71 (138)       | 26.92 (156)   | 76.81             | 73.08         |
| ESS;N;SG             | 30.00 (110)       | 22.44 (156)   | 68.18             | 56.41         |
| GEN;N;PL             | 38.66 (119)       | 30.77 (156)   | 73.95             | 64.74         |
| ESS;N;PL             | 41.56 (77)        | 31.41 (156)   | 90.91             | 94.23         |
| ACC;N;SG             | 32.87 (143)       | 29.94 (157)   | 74.13             | 70.06         |
| ADJ;ESS;FEM;SG       | 41.18 (17)        | 40.00 (20)    | 88.24             | 90            |
| ADJ;ESS;MASC;SG      | 50.00 (14)        | 45.00 (20)    | 100.00            | 100           |
| ADJ;DAT;NEUT;SG      | 63.64 (11)        | 40.00 (20)    | 100.00            | 100           |
| ADJ;FEM;GEN;SG       | 41.18 (17)        | 40.00 (20)    | 88.24             | 90            |
| ADJ;DAT;PL           | 47.06 (17)        | 45.00 (20)    | 100.00            | 100           |
| ADJ;INS;PL           | 78.57 (14)        | 55.00 (20)    | 100.00            | 100           |
| ADJ;MASC;NOM;PL      | 36.36 (11)        | 30.00 (20)    | 100.00            | 95            |
| ADJ;GEN;NEUT;SG      | 55.56 (18)        | 50.00 (20)    | 94.44             | 95            |
| ADJ;ESS;NEUT;SG      | 50.00 (14)        | 45.00 (20)    | 100.00            | 100           |
| ACC;ADJ;MASC;SG      | 55.56 (18)        | 50.00 (20)    | 94.44             | 95            |
| ADJ;GEN;PL           | 63.16 (19)        | 60.00 (20)    | 100.00            | 100           |
| ADJ;FEM;INS;SG       | 92.31 (13)        | 65.00 (20)    | 100.00            | 100           |
| ADJ;INS;MASC;SG      | 47.06 (17)        | 45.00 (20)    | 100.00            | 100           |
| ADJ;INS;NEUT;SG      | 47.06 (17)        | 45.00 (20)    | 100.00            | 100           |
| ACC;ADJ;NEUT;SG      | 66.67 (18)        | 60.00 (20)    | 100.00            | 100           |
| ACC;ADJ;INAN;MASC;SG | 52.63 (19)        | 50.00 (20)    | 100.00            | 100           |
| ACC;ADJ;PL           | 66.67 (18)        | 60.00 (20)    | 100.00            | 100           |
| ACC;ADJ;MASC;PL      | 63.16 (19)        | 60.00 (20)    | 100.00            | 100           |
| ADJ;FEM;NOM;SG       | 44.44 (18)        | 40.00 (20)    | 88.89             | 85            |
| ADJ;ESS;PL           | 63.16 (19)        | 60.00 (20)    | 100.00            | 100           |
| ADJ;NOM;PL           | 66.67 (18)        | 60.00 (20)    | 100.00            | 100           |
| ADJ;GEN;MASC;SG      | 55.56 (18)        | 50.00 (20)    | 94.44             | 95            |
| ADJ;NEUT;NOM;SG      | 66.67 (18)        | 60.00 (20)    | 100.00            | 100           |
| ACC;ADJ;FEM;SG       | 80.00 (15)        | 65.00 (20)    | 100.00            | 100           |
| ADJ;MASC;NOM;SG      | 52.63 (19)        | 50.00 (20)    | 100.00            | 100           |
| ADJ;DAT;MASC;SG      | 63.64 (11)        | 40.00 (20)    | 100.00            | 100           |
| ADJ;DAT;FEM;SG       | 41.18 (17)        | 40.00 (20)    | 88.24             | 90            |
| NFIN;V               | 60.00 (10)        | 54.55 (11)    | 100.00            | 100           |
| 2;PRS;SG;V           | 0.00 (1)          | 0.00 (1)      | 100.00            | 100           |
| 1;PL;PRS;V           | 0.00 (1)          | 0.00 (1)      | 100.00            | 100           |
| 3;NEUT;PST;SG;V      | 0.00 (1)          | 0.00 (1)      | 0.00              | 0             |
| 3;MASC;PST;SG;V      | 0.00 (1)          | 0.00 (1)      | 0.00              | 0             |
| 2;IMP;SG;V           | -                 | 0.00 (1)      | -                 | 0             |
| 3;MASC;PL;PST;V      | 0.00 (1)          | 0.00 (1)      | 0.00              | 0             |
| 3;FEM;PL;PST;V       | 0.00 (1)          | 0.00 (1)      | 0.00              | 0             |
| 1;IMP;PL;V           | -                 | 0.00 (1)      | -                 | 0             |
| 3;PRS;SG;V           | 100.00 (1)        | 100.00 (1)    | 100.00            | 100           |
| 2;PL;PRS;V           | 0.00 (1)          | 0.00 (1)      | 100.00            | 100           |
| 2;IMP;PL;V           | -                 | 0.00 (1)      | -                 | 0             |
| 3;FEM;PST;SG;V       | 0.00 (1)          | 0.00 (1)      | 0.00              | 0             |
| 1;PRS;SG;V           | 0.00 (1)          | 0.00 (1)      | 100.00            | 100           |
| 3;PL;PRS;V           | 100.00 (1)        | 100.00 (1)    | 100.00            | 100           |

Table 98: The performance of [Ruder et al. \(2018\)](#)’s model on translating words belonging to a specific morphological category for the Polish–Slovak language pair (the grey numbers correspond to the dictionary sizes).

| Polish–Ukrainian     |                   |               |                   |               |
|----------------------|-------------------|---------------|-------------------|---------------|
| Morph                | Normal (In vocab) | Normal (+OOV) | Lexeme (In vocab) | Lexeme (+OOV) |
| ALL                  | 35.78 (1118)      | 30.49 (1463)  | 75.13             | 71.7          |
| N;PL;VOC             | 34.11 (129)       | 33.08 (133)   | 74.42             | 71.43         |
| N;NOM;PL             | 34.11 (129)       | 33.08 (133)   | 74.42             | 71.43         |
| ACC;N;PL             | 34.88 (129)       | 33.83 (133)   | 73.64             | 71.43         |
| ACC;N;SG             | 40.00 (130)       | 38.24 (136)   | 73.08             | 71.32         |
| ESS;N;PL             | 40.23 (87)        | 33.83 (133)   | 87.36             | 87.97         |
| N;SG;VOC             | 26.56 (64)        | 22.06 (136)   | 64.06             | 52.21         |
| INS;N;PL             | 36.63 (101)       | 30.83 (133)   | 100.00            | 99.25         |
| GEN;N;SG             | 39.85 (133)       | 38.97 (136)   | 74.44             | 73.53         |
| DAT;N;PL             | 46.43 (56)        | 33.83 (133)   | 94.64             | 93.98         |
| INS;N;SG             | 41.74 (115)       | 36.03 (136)   | 80.87             | 80.15         |
| N;NOM;SG             | 37.50 (136)       | 37.23 (137)   | 72.06             | 71.53         |
| ESS;N;SG             | 32.76 (116)       | 28.68 (136)   | 62.07             | 55.88         |
| DAT;N;SG             | 24.47 (94)        | 17.65 (136)   | 51.06             | 38.24         |
| GEN;N;PL             | 37.19 (121)       | 33.83 (133)   | 79.34             | 77.44         |
| 2;MASC;PST;SG;V      | 0.00 (4)          | 0.00 (7)      | 0.00              | 0             |
| 1;FEM;PL;PST;V       | -                 | 28.57 (7)     | -                 | 71.43         |
| 1;MASC;PST;SG;V      | 0.00 (5)          | 0.00 (7)      | 20.00             | 14.29         |
| 3;FEM;PL;PST;V       | 33.33 (6)         | 28.57 (7)     | 83.33             | 85.71         |
| 2;FUT;SG;V           | 0.00 (1)          | 0.00 (1)      | 0.00              | 0             |
| 2;MASC;PL;PST;V      | 0.00 (2)          | 14.29 (7)     | 0.00              | 42.86         |
| 3;NEUT;PST;SG;V      | 60.00 (5)         | 42.86 (7)     | 100.00            | 100           |
| 1;MASC;PL;PST;V      | 0.00 (3)          | 0.00 (7)      | 33.33             | 14.29         |
| 1;FUT;PL;V           | 0.00 (1)          | 0.00 (1)      | 100.00            | 100           |
| 1;FEM;PST;SG;V       | 0.00 (4)          | 0.00 (7)      | 25.00             | 14.29         |
| NFIN;V               | 57.14 (7)         | 57.14 (7)     | 100.00            | 100           |
| 3;FUT;PL;V           | 100.00 (1)        | 100.00 (1)    | 100.00            | 100           |
| 2;FEM;PST;SG;V       | 0.00 (1)          | 0.00 (7)      | 0.00              | 0             |
| 3;MASC;PL;PST;V      | 66.67 (6)         | 57.14 (7)     | 83.33             | 85.71         |
| 2;IMP;SG;V           | 0.00 (7)          | 0.00 (7)      | 0.00              | 0             |
| 2;IMP;PL;V           | 25.00 (4)         | 14.29 (7)     | 50.00             | 28.57         |
| 3;MASC;PST;SG;V      | 57.14 (7)         | 57.14 (7)     | 100.00            | 100           |
| 3;FEM;PST;SG;V       | 57.14 (7)         | 57.14 (7)     | 100.00            | 100           |
| 3;FUT;SG;V           | 0.00 (1)          | 0.00 (1)      | 0.00              | 0             |
| 2;FEM;PL;PST;V       | -                 | 14.29 (7)     | -                 | 71.43         |
| 1;FUT;SG;V           | 100.00 (1)        | 100.00 (1)    | 100.00            | 100           |
| 2;FUT;PL;V           | 0.00 (1)          | 0.00 (1)      | 0.00              | 0             |
| 1;IMP;PL;V           | 0.00 (3)          | 0.00 (7)      | 0.00              | 0             |
| 1;PRS;SG;V           | 33.33 (6)         | 33.33 (6)     | 50.00             | 50            |
| 3;PL;PRS;V           | 66.67 (6)         | 66.67 (6)     | 100.00            | 100           |
| 2;PRS;SG;V           | 25.00 (4)         | 33.33 (6)     | 50.00             | 50            |
| 2;PL;PRS;V           | 0.00 (3)          | 16.67 (6)     | 33.33             | 50            |
| 1;PL;PRS;V           | 50.00 (4)         | 33.33 (6)     | 75.00             | 83.33         |
| 3;PRS;SG;V           | 50.00 (6)         | 50.00 (6)     | 100.00            | 100           |
| ACC;ADJ;MASC;SG      | 0.00 (2)          | 0.00 (2)      | 100.00            | 100           |
| ADJ;DAT;FEM;SG       | -                 | 0.00 (2)      | -                 | 100           |
| ADJ;NEUT;NOM;SG      | 50.00 (2)         | 50.00 (2)     | 100.00            | 100           |
| ACC;ADJ;PL           | 50.00 (2)         | 50.00 (2)     | 100.00            | 100           |
| ADJ;FEM;INS;SG       | 0.00 (2)          | 0.00 (2)      | 100.00            | 100           |
| ADJ;INS;MASC;SG      | 0.00 (2)          | 0.00 (2)      | 100.00            | 100           |
| ADJ;FEM;NOM;SG       | 0.00 (2)          | 0.00 (2)      | 100.00            | 100           |
| ADJ;GEN;PL           | 0.00 (2)          | 0.00 (2)      | 100.00            | 100           |
| ADJ;NOM;PL           | 50.00 (2)         | 50.00 (2)     | 100.00            | 100           |
| ADJ;DAT;NEUT;SG      | -                 | 0.00 (2)      | -                 | 100           |
| ADJ;ESS;NEUT;SG      | -                 | 0.00 (2)      | -                 | 100           |
| ADJ;MASC;NOM;SG      | 0.00 (2)          | 0.00 (2)      | 100.00            | 100           |
| ADJ;GEN;NEUT;SG      | 0.00 (2)          | 0.00 (2)      | 100.00            | 100           |
| ADJ;ESS;FEM;SG       | -                 | 0.00 (2)      | -                 | 100           |
| ADJ;ESS;PL           | 0.00 (2)          | 0.00 (2)      | 100.00            | 100           |
| ADJ;DAT;MASC;SG      | -                 | 0.00 (2)      | -                 | 100           |
| ADJ;INS;NEUT;SG      | 0.00 (2)          | 0.00 (2)      | 100.00            | 100           |
| ADJ;INS;PL           | 0.00 (1)          | 0.00 (2)      | 100.00            | 100           |
| ACC;ADJ;NEUT;SG      | 50.00 (2)         | 50.00 (2)     | 100.00            | 100           |
| ACC;ADJ;FEM;SG       | 0.00 (2)          | 0.00 (2)      | 100.00            | 100           |
| ADJ;DAT;PL           | 0.00 (2)          | 0.00 (2)      | 100.00            | 100           |
| ACC;ADJ;INAN;MASC;SG | 0.00 (2)          | 0.00 (2)      | 100.00            | 100           |
| ADJ;FEM;GEN;SG       | 0.00 (2)          | 0.00 (2)      | 100.00            | 100           |
| ADJ;ESS;MASC;SG      | -                 | 0.00 (2)      | -                 | 100           |
| ADJ;GEN;MASC;SG      | 0.00 (2)          | 0.00 (2)      | 100.00            | 100           |

Table 99: The performance of [Ruder et al. \(2018\)](#)’s model on translating words belonging to a specific morphological category for the Polish–Ukrainian language pair (the grey numbers correspond to the dictionary sizes).



| Morph           | Normal (In vocab) | Catalan–French |                   |               |
|-----------------|-------------------|----------------|-------------------|---------------|
|                 |                   | Normal (+OOV)  | Lexeme (In vocab) | Lexeme (+OOV) |
| ALL             | 55.86 (5605)      | 32.00 (11367)  | 79.38             | 49.21         |
| N;SG            | 66.13 (1293)      | 64.88 (1321)   | 89.48             | 89.48         |
| N;PL            | 66.12 (1089)      | 62.16 (1221)   | 95.04             | 93.69         |
| 1;PL;PRS;SBJV;V | 13.33 (60)        | 9.13 (219)     | 21.67             | 19.18         |
| 1;COND;SG;V     | 39.60 (101)       | 29.22 (219)    | 58.42             | 52.51         |
| 1;PST;SBJV;SG;V | 1.67 (60)         | 10.05 (219)    | 6.67              | 23.29         |
| 2;PFV;PL;PST;V  | -                 | 0.46 (219)     | -                 | 0.46          |
| 2;IPFV;PL;PST;V | 0.00 (2)          | 0.00 (219)     | 50.00             | 2.28          |
| 3;COND;PL;V     | 54.05 (74)        | 31.82 (220)    | 63.51             | 54.09         |
| 2;PL;PRS;V      | 30.00 (60)        | 22.37 (219)    | 46.67             | 35.62         |
| 3;PL;PST;SBJV;V | 0.00 (64)         | 0.00 (220)     | 0.00              | 0             |
| 2;COND;PL;V     | 0.00 (1)          | 4.57 (219)     | 0.00              | 12.33         |
| NFIN;V          | 61.14 (211)       | 58.74 (223)    | 89.57             | 86.55         |
| 2;IMP;POS;SG;V  | 51.49 (202)       | 47.95 (219)    | 67.82             | 61.19         |
| 3;FUT;PL;V      | 65.33 (75)        | 45.45 (220)    | 82.67             | 82.27         |
| 2;IMP;PL;POS;V  | 30.00 (60)        | 22.37 (219)    | 46.67             | 35.62         |
| 1;FUT;SG;V      | 26.92 (26)        | 27.40 (219)    | 57.69             | 48.86         |
| 2;PL;PST;SBJV;V | 0.00 (1)          | 0.00 (219)     | 0.00              | 1.37          |
| 3;PST;SBJV;SG;V | 8.11 (111)        | 10.00 (220)    | 16.22             | 23.18         |
| 3;PFV;PST;SG;V  | 53.05 (164)       | 42.73 (220)    | 71.95             | 60.45         |
| 2;PST;SBJV;SG;V | 0.00 (3)          | 0.46 (219)     | 0.00              | 0.46          |
| 1;PRS;SBJV;SG;V | 22.37 (152)       | 20.81 (221)    | 32.89             | 28.05         |
| 1;IPFV;PL;PST;V | 0.00 (5)          | 0.46 (219)     | 0.00              | 1.83          |
| 1;COND;PL;V     | 20.00 (5)         | 2.74 (219)     | 20.00             | 5.48          |
| 3;PRS;SBJV;SG;V | 22.22 (153)       | 20.72 (222)    | 32.68             | 27.93         |
| 3;PFV;PL;PST;V  | 65.65 (131)       | 51.36 (220)    | 97.71             | 95.45         |
| 2;PRS;SBJV;SG;V | 8.33 (36)         | 6.79 (221)     | 13.89             | 10.41         |
| 3;IPFV;PL;PST;V | 68.35 (158)       | 58.64 (220)    | 95.57             | 94.09         |
| 1;PL;PST;SBJV;V | 0.00 (2)          | 0.00 (219)     | 0.00              | 0             |
| 3;FUT;SG;V      | 61.02 (118)       | 46.36 (220)    | 80.51             | 73.64         |
| 3;PL;PRS;SBJV;V | 27.35 (117)       | 22.07 (222)    | 42.74             | 33.78         |
| 2;PFV;PST;SG;V  | 0.00 (2)          | 3.65 (219)     | 50.00             | 9.13          |
| 1;PFV;PL;PST;V  | 0.00 (2)          | 3.65 (219)     | 0.00              | 7.76          |
| 3;IPFV;PST;SG;V | 62.07 (174)       | 55.45 (220)    | 90.80             | 85.91         |
| 2;PL;PRS;SBJV;V | 25.64 (39)        | 21.00 (219)    | 38.46             | 33.79         |
| 1;FUT;PL;V      | 18.75 (32)        | 10.96 (219)    | 21.88             | 18.72         |
| 3;PRS;SG;V      | 51.47 (204)       | 47.96 (221)    | 68.63             | 62.44         |
| 1;PRS;SG;V      | 8.16 (98)         | 8.14 (221)     | 15.31             | 13.12         |
| 2;FUT;PL;V      | 14.29 (7)         | 7.76 (219)     | 28.57             | 17.35         |
| 1;IMP;PL;POS;V  | 12.50 (72)        | 9.17 (218)     | 22.22             | 19.27         |
| 1;IPFV;PST;SG;V | 65.15 (132)       | 55.71 (219)    | 93.18             | 86.3          |
| 2;PRS;SG;V      | 31.40 (86)        | 20.45 (220)    | 47.67             | 31.82         |
| 2;FUT;SG;V      | 20.00 (5)         | 2.28 (219)     | 20.00             | 4.11          |
| 1;PFV;PST;SG;V  | 51.72 (29)        | 8.29 (217)     | 68.97             | 10.6          |
| 3;PL;PRS;V      | 62.96 (189)       | 57.47 (221)    | 92.59             | 90.95         |
| 3;COND;SG;V     | 37.29 (118)       | 29.09 (220)    | 55.93             | 52.73         |
| 2;COND;SG;V     | 0.00 (5)          | 0.00 (219)     | 20.00             | 2.28          |
| 2;IPFV;PST;SG;V | 0.00 (8)          | 0.46 (219)     | 25.00             | 3.2           |
| 1;PL;PRS;V      | 14.47 (76)        | 10.05 (219)    | 25.00             | 20.55         |
| ADJ;FEM;PL      | 69.88 (332)       | 68.96 (335)    | 98.49             | 98.51         |
| ADJ;MASC;PL     | 68.69 (329)       | 65.62 (349)    | 96.05             | 95.7          |
| ADJ;MASC;SG     | 70.95 (358)       | 70.05 (364)    | 96.65             | 96.43         |
| ADJ;FEM;SG      | 70.83 (360)       | 70.14 (365)    | 96.67             | 96.44         |

Table 100: The performance of [Ruder et al. \(2018\)](#)’s model on translating words belonging to a specific morphological category for the Catalan–French language pair (the grey numbers correspond to the dictionary sizes).

| Morph           | Catalan–Italian   |               |                   |               |
|-----------------|-------------------|---------------|-------------------|---------------|
|                 | Normal (In vocab) | Normal (+OOV) | Lexeme (In vocab) | Lexeme (+OOV) |
| ALL             | 52.97 (5518)      | 29.30 (11970) | 80.10             | 49.2          |
| 2;FUT;SG;V      | 0.00 (10)         | 2.07 (241)    | 10.00             | 4.98          |
| 2;IPFV;PL;PST;V | 0.00 (1)          | 0.41 (241)    | 0.00              | 1.66          |
| 1;PFV;PL;PST;V  | 0.00 (1)          | 1.24 (241)    | 0.00              | 1.66          |
| 1;IPFV;PL;PST;V | 50.00 (6)         | 22.82 (241)   | 83.33             | 53.53         |
| 3;IMP;PL;POS;V  | 16.04 (106)       | 11.57 (242)   | 25.47             | 21.49         |
| 2;PL;PRS;SBJV;V | 0.00 (29)         | 0.83 (240)    | 0.00              | 2.08          |
| 2;PFV;PL;PST;V  | -                 | 0.41 (241)    | -                 | 1.66          |
| 3;IMP;POS;SG;V  | 23.40 (141)       | 16.53 (242)   | 33.33             | 23.55         |
| 3;PST;SBJV;SG;V | 40.00 (130)       | 32.78 (241)   | 66.92             | 65.15         |
| 1;IPFV;PST;SG;V | 63.00 (100)       | 55.19 (241)   | 90.00             | 84.65         |
| 1;FUT;PL;V      | 32.00 (25)        | 15.77 (241)   | 56.00             | 38.59         |
| 1;PL;PRS;V      | 22.86 (70)        | 13.75 (240)   | 57.14             | 37.5          |
| 1;FUT;SG;V      | 40.91 (22)        | 19.50 (241)   | 63.64             | 36.51         |
| 3;PRS;SG;V      | 50.23 (221)       | 48.97 (243)   | 69.23             | 65.02         |
| 2;PRS;SG;V      | 23.08 (91)        | 10.33 (242)   | 39.56             | 14.05         |
| 1;PL;PRS;SBJV;V | 18.84 (69)        | 12.08 (240)   | 53.62             | 37.5          |
| 3;IPFV;PL;PST;V | 67.70 (161)       | 59.09 (242)   | 93.79             | 94.21         |
| 3;COND;PL;V     | 3.12 (64)         | 2.89 (242)    | 4.69              | 8.68          |
| 3;COND;SG;V     | 7.08 (113)        | 4.55 (242)    | 15.93             | 16.12         |
| 2;PRS;SBJV;SG;V | 2.70 (37)         | 5.81 (241)    | 16.22             | 10.37         |
| 2;FUT;PL;V      | 0.00 (8)          | 1.24 (241)    | 0.00              | 7.47          |
| 2;IPFV;PST;SG;V | 0.00 (4)          | 2.07 (241)    | 0.00              | 2.07          |
| 3;PFV;PST;SG;V  | 49.42 (172)       | 43.39 (242)   | 72.67             | 67.36         |
| NFIN;V          | 60.34 (232)       | 58.85 (243)   | 90.95             | 90.53         |
| 3;PL;PST;SBJV;V | 45.16 (93)        | 35.27 (241)   | 95.70             | 96.68         |
| 2;IMP;POS;SG;V  | 51.63 (215)       | 49.17 (242)   | 68.84             | 64.05         |
| 3;IPFV;PST;SG;V | 62.50 (184)       | 54.96 (242)   | 87.50             | 84.71         |
| 3;PFV;PL;PST;V  | 61.43 (140)       | 54.55 (242)   | 96.43             | 96.28         |
| 1;COND;SG;V     | 8.25 (97)         | 4.56 (241)    | 13.40             | 15.77         |
| 1;PRS;SG;V      | 15.96 (94)        | 12.40 (242)   | 38.30             | 21.49         |
| 2;IMP;PL;POS;V  | 3.77 (53)         | 1.24 (241)    | 11.32             | 2.49          |
| 3;FUT;SG;V      | 57.14 (119)       | 44.21 (242)   | 84.87             | 80.99         |
| 1;IMP;PL;POS;V  | 18.84 (69)        | 12.08 (240)   | 53.62             | 37.5          |
| 2;PST;SBJV;SG;V | 0.00 (3)          | 1.25 (240)    | 0.00              | 4.58          |
| 2;PL;PRS;V      | 3.85 (52)         | 1.25 (240)    | 11.54             | 2.5           |
| 1;PST;SBJV;SG;V | 47.83 (69)        | 32.92 (240)   | 75.36             | 65.42         |
| 2;PL;PST;SBJV;V | -                 | 0.00 (240)    | -                 | 0             |
| 2;COND;PL;V     | 0.00 (2)          | 0.00 (241)    | 0.00              | 1.66          |
| 1;PFV;PST;SG;V  | 60.00 (25)        | 10.55 (237)   | 72.00             | 14.77         |
| 1;PRS;SBJV;SG;V | 23.57 (140)       | 16.60 (241)   | 33.57             | 23.65         |
| 3;PRS;SBJV;SG;V | 23.40 (141)       | 16.53 (242)   | 33.33             | 23.55         |
| 1;COND;PL;V     | 0.00 (5)          | 7.88 (241)    | 40.00             | 25.31         |
| 2;COND;SG;V     | 0.00 (5)          | 0.00 (241)    | 0.00              | 1.24          |
| 1;PL;PST;SBJV;V | 0.00 (4)          | 8.33 (240)    | 75.00             | 23.33         |
| 3;PL;PRS;V      | 55.22 (201)       | 49.59 (242)   | 85.07             | 79.34         |
| 3;FUT;PL;V      | 55.26 (76)        | 38.02 (242)   | 85.53             | 80.99         |
| 3;PL;PRS;SBJV;V | 16.04 (106)       | 11.57 (242)   | 25.47             | 21.49         |
| 2;PFV;PST;SG;V  | -                 | 0.00 (241)    | -                 | 1.66          |
| N;PL            | 60.66 (1083)      | 57.38 (1192)  | 90.67             | 90.1          |
| N;SG            | 65.26 (1307)      | 64.63 (1323)  | 93.50             | 93.27         |
| ADJ;FEM;SG      | 63.45 (290)       | 62.54 (291)   | 96.90             | 96.56         |
| ADJ;MASC;PL     | 66.42 (274)       | 65.60 (282)   | 94.89             | 95.04         |
| ADJ;FEM;PL      | 67.66 (269)       | 67.41 (270)   | 97.03             | 96.67         |
| ADJ;MASC;SG     | 63.23 (291)       | 62.33 (292)   | 96.91             | 96.58         |

Table 101: The performance of [Ruder et al. \(2018\)](#)’s model on translating words belonging to a specific morphological category for the Catalan–Italian language pair (the grey numbers correspond to the dictionary sizes).

| Catalan–Portuguese |                   |               |                   |               |
|--------------------|-------------------|---------------|-------------------|---------------|
| Morph              | Normal (In vocab) | Normal (+OOV) | Lexeme (In vocab) | Lexeme (+OOV) |
| ALL                | 62.75 (5418)      | 41.05 (10759) | 83.11             | 57.73         |
| N;PL               | 68.06 (1027)      | 64.63 (1128)  | 92.21             | 91.58         |
| N;SG               | 67.41 (1209)      | 66.21 (1234)  | 90.98             | 90.92         |
| 3;PRS;SG;V         | 62.05 (224)       | 57.61 (243)   | 74.11             | 68.31         |
| 3;IPFV;PL;PST;V    | 75.88 (170)       | 66.80 (241)   | 95.29             | 96.68         |
| 1;FUT;PL;V         | 35.00 (20)        | 47.50 (240)   | 40.00             | 65.42         |
| 2;PRS;SBJV;SG;V    | 2.86 (35)         | 1.23 (243)    | 8.57              | 3.29          |
| 1;COND;PL;V        | 37.50 (8)         | 43.33 (240)   | 50.00             | 62.5          |
| 3;PRS;SBJV;SG;V    | 20.37 (162)       | 14.81 (243)   | 25.31             | 20.99         |
| 2;FUT;PL;V         | 0.00 (3)          | 0.00 (240)    | 0.00              | 0             |
| 1;PL;PRS;V         | 40.00 (95)        | 25.42 (240)   | 50.53             | 35.42         |
| 3;PFV;PL;PST;V     | 69.93 (153)       | 58.09 (241)   | 95.42             | 95.02         |
| 2;PRS;SG;V         | 44.44 (81)        | 31.28 (243)   | 49.38             | 37.45         |
| 2;IMP;POS;SG;V     | 60.54 (223)       | 56.38 (243)   | 73.09             | 67.49         |
| 3;COND;PL;V        | 68.29 (82)        | 61.00 (241)   | 81.71             | 87.14         |
| 3;IPFV;PST;SG;V    | 71.58 (190)       | 63.90 (241)   | 87.37             | 86.72         |
| 3;COND;SG;V        | 68.18 (132)       | 58.92 (241)   | 83.33             | 78.84         |
| 1;IMP;PL;POS;V     | 47.17 (53)        | 26.14 (241)   | 52.83             | 36.1          |
| 3;FUT;SG;V         | 73.17 (123)       | 61.83 (241)   | 86.18             | 85.89         |
| 2;IPFV;PST;SG;V    | 25.00 (4)         | 19.92 (241)   | 25.00             | 24.07         |
| 1;PL;PRS;SBJV;V    | 47.17 (53)        | 26.25 (240)   | 52.83             | 36.25         |
| 3;PL;PRS;SBJV;V    | 36.84 (133)       | 25.51 (243)   | 48.12             | 40.74         |
| 1;FUT;SG;V         | 36.84 (19)        | 53.11 (241)   | 47.37             | 73.03         |
| 1;IPFV;PST;SG;V    | 71.58 (190)       | 63.49 (241)   | 87.37             | 86.31         |
| 1;PFV;PST;SG;V     | 40.54 (37)        | 6.64 (241)    | 67.57             | 11.62         |
| 3;PL;PRS;V         | 64.90 (208)       | 58.85 (243)   | 87.98             | 82.3          |
| 2;PL;PRS;SBJV;V    | 0.00 (10)         | 0.83 (240)    | 10.00             | 3.33          |
| 3;IMP;PL;POS;V     | 36.84 (133)       | 25.51 (243)   | 48.12             | 40.74         |
| 1;PRS;SBJV;SG;V    | 20.37 (162)       | 14.81 (243)   | 25.31             | 20.99         |
| 3;FUT;PL;V         | 55.56 (81)        | 54.77 (241)   | 70.37             | 77.59         |
| 1;COND;SG;V        | 68.18 (132)       | 58.92 (241)   | 83.33             | 78.84         |
| 2;PFV;PL;PST;V     | -                 | 0.00 (240)    | -                 | 0             |
| 1;PFV;PL;PST;V     | 0.00 (1)          | 7.08 (240)    | 0.00              | 9.17          |
| 2;PL;PRS;V         | 2.94 (34)         | 1.67 (240)    | 8.82              | 4.17          |
| 2;COND;SG;V        | 66.67 (3)         | 20.75 (241)   | 66.67             | 31.95         |
| 2;FUT;SG;V         | 16.67 (6)         | 4.15 (241)    | 33.33             | 7.88          |
| 2;IMP;PL;POS;V     | 4.08 (49)         | 1.65 (242)    | 10.20             | 4.13          |
| 1;PRS;SG;V         | 33.66 (101)       | 23.46 (243)   | 52.48             | 34.98         |
| 3;IMP;POS;SG;V     | 20.37 (162)       | 14.81 (243)   | 25.31             | 20.99         |
| 3;PFV;PST;SG;V     | 63.64 (187)       | 54.36 (241)   | 81.82             | 71.78         |
| 2;PFV;PST;SG;V     | 0.00 (2)          | 0.41 (241)    | 0.00              | 0.41          |
| 1;IPFV;PL;PST;V    | 33.33 (3)         | 12.08 (240)   | 33.33             | 30            |
| NFIN;V             | 71.55 (232)       | 68.85 (244)   | 91.38             | 88.52         |
| 2;IPFV;PL;PST;V    | 0.00 (2)          | 0.42 (240)    | 0.00              | 2.5           |
| 2;COND;PL;V        | -                 | 1.67 (240)    | -                 | 2.08          |
| ADJ;FEM;SG         | 71.56 (327)       | 71.12 (329)   | 96.94             | 96.96         |
| ADJ;FEM;PL         | 76.92 (299)       | 76.16 (302)   | 98.33             | 98.34         |
| ADJ;MASC;PL        | 75.48 (310)       | 73.07 (323)   | 98.39             | 98.45         |
| ADJ;MASC;SG        | 71.78 (326)       | 70.78 (332)   | 96.93             | 96.99         |

Table 102: The performance of [Ruder et al. \(2018\)](#)’s model on translating words belonging to a specific morphological category for the Catalan–Portuguese language pair (the grey numbers correspond to the dictionary sizes).

| Catalan–Spanish |                   |               |                   |               |
|-----------------|-------------------|---------------|-------------------|---------------|
| Morph           | Normal (In vocab) | Normal (+OOV) | Lexeme (In vocab) | Lexeme (+OOV) |
| ALL             | 68.04 (5879)      | 43.32 (12282) | 84.16             | 57.36         |
| ADJ;FEM;SG      | 76.90 (342)       | 76.01 (346)   | 98.54             | 98.55         |
| ADJ;FEM;PL      | 79.87 (318)       | 78.57 (322)   | 98.74             | 98.76         |
| ADJ;MASC;SG     | 76.54 (341)       | 75.65 (345)   | 98.53             | 98.55         |
| ADJ;MASC;PL     | 82.30 (322)       | 79.82 (332)   | 98.76             | 98.8          |
| 1;PL;PRS;SBJV;V | 47.44 (78)        | 29.15 (247)   | 66.67             | 44.53         |
| 1;COND;SG;V     | 83.09 (136)       | 68.55 (248)   | 94.12             | 88.31         |
| 1;PST;SBJV;SG;V | 17.93 (145)       | 14.57 (247)   | 26.21             | 26.72         |
| 1;PL;PST;SBJV;V | 0.00 (4)          | 2.02 (247)    | 0.00              | 8.1           |
| 1;PL;PRS;V      | 52.81 (89)        | 32.11 (246)   | 69.66             | 47.15         |
| 3;IPFV;PL;PST;V | 84.00 (175)       | 70.85 (247)   | 99.43             | 97.17         |
| 2;PFV;PL;PST;V  | -                 | 0.40 (248)    | -                 | 0.81          |
| 3;PST;SBJV;SG;V | 17.93 (145)       | 14.57 (247)   | 26.21             | 26.72         |
| 2;IMP;PL;POS;V  | 5.00 (60)         | 4.45 (247)    | 5.00              | 8.5           |
| 3;COND;PL;V     | 84.44 (90)        | 70.97 (248)   | 98.89             | 96.37         |
| 2;FUT;SG;V      | 36.36 (11)        | 29.84 (248)   | 36.36             | 37.9          |
| 3;IMP;PL;POS;V  | 43.85 (130)       | 28.74 (247)   | 56.15             | 39.68         |
| 3;PL;PRS;V      | 71.57 (204)       | 61.79 (246)   | 91.18             | 82.93         |
| 1;PRS;SG;V      | 23.58 (106)       | 19.43 (247)   | 36.79             | 29.55         |
| 1;IPFV;PL;PST;V | 20.00 (5)         | 12.96 (247)   | 60.00             | 27.53         |
| 2;PST;SBJV;SG;V | 0.00 (2)          | 4.45 (247)    | 0.00              | 4.45          |
| 1;PRS;SBJV;SG;V | 33.95 (162)       | 23.08 (247)   | 42.59             | 29.55         |
| 1;IPFV;PST;SG;V | 77.49 (191)       | 69.64 (247)   | 93.19             | 90.69         |
| 3;PRS;SBJV;SG;V | 33.95 (162)       | 23.08 (247)   | 42.59             | 29.55         |
| NFIN;V          | 65.53 (235)       | 63.31 (248)   | 86.38             | 85.48         |
| 1;IMP;PL;POS;V  | 47.44 (78)        | 29.15 (247)   | 66.67             | 44.53         |
| 1;FUT;PL;V      | 80.00 (40)        | 59.27 (248)   | 90.00             | 81.05         |
| 2;COND;PL;V     | 0.00 (1)          | 7.26 (248)    | 0.00              | 12.5          |
| 2;IMP;POS;SG;V  | 68.86 (228)       | 64.92 (248)   | 78.07             | 72.18         |
| 3;COND;SG;V     | 83.09 (136)       | 68.55 (248)   | 94.12             | 88.31         |
| 1;PFV;PST;SG;V  | 61.29 (31)        | 11.79 (246)   | 80.65             | 16.26         |
| 2;IPFV;PST;SG;V | 0.00 (4)          | 10.53 (247)   | 25.00             | 11.74         |
| 3;PL;PST;SBJV;V | 11.11 (108)       | 11.34 (247)   | 17.59             | 31.98         |
| 3;PFV;PST;SG;V  | 65.93 (182)       | 52.82 (248)   | 81.32             | 72.18         |
| 2;IPFV;PL;PST;V | -                 | 0.40 (247)    | -                 | 1.21          |
| 2;PL;PST;SBJV;V | -                 | 0.00 (247)    | -                 | 0             |
| 3;IPFV;PST;SG;V | 77.49 (191)       | 69.64 (247)   | 93.19             | 90.69         |
| 3;PFV;PL;PST;V  | 80.67 (150)       | 68.15 (248)   | 99.33             | 97.58         |
| 2;FUT;PL;V      | 0.00 (5)          | 17.34 (248)   | 0.00              | 27.42         |
| 1;PFV;PL;PST;V  | 0.00 (1)          | 10.08 (248)   | 0.00              | 14.92         |
| 2;PFV;PST;SG;V  | -                 | 0.00 (248)    | -                 | 0             |
| 1;COND;PL;V     | 66.67 (6)         | 59.27 (248)   | 83.33             | 80.24         |
| 3;PL;PRS;SBJV;V | 43.85 (130)       | 28.74 (247)   | 56.15             | 39.68         |
| 3;PRS;SG;V      | 69.57 (230)       | 65.73 (248)   | 79.57             | 73.79         |
| 2;PL;PRS;V      | 4.35 (46)         | 4.47 (246)    | 4.35              | 8.54          |
| 3;FUT;PL;V      | 79.35 (92)        | 68.15 (248)   | 95.65             | 91.53         |
| 3;IMP;POS;SG;V  | 33.95 (162)       | 23.08 (247)   | 42.59             | 29.55         |
| 3;FUT;SG;V      | 82.44 (131)       | 72.98 (248)   | 96.18             | 95.16         |
| 1;FUT;SG;V      | 73.33 (30)        | 62.90 (248)   | 80.00             | 77.82         |
| 2;PL;PRS;SBJV;V | 2.56 (39)         | 5.26 (247)    | 2.56              | 9.31          |
| 2;COND;SG;V     | 0.00 (2)          | 18.15 (248)   | 50.00             | 25.81         |
| 2;PRS;SG;V      | 45.45 (88)        | 32.39 (247)   | 59.09             | 41.7          |
| 2;PRS;SBJV;SG;V | 8.70 (46)         | 2.43 (247)    | 17.39             | 4.05          |
| N;SG            | 77.33 (1266)      | 76.53 (1278)  | 94.87             | 94.91         |
| N;PL            | 75.16 (1079)      | 73.36 (1175)  | 93.42             | 93.11         |

Table 103: The performance of [Ruder et al. \(2018\)](#)’s model on translating words belonging to a specific morphological category for the Catalan–Spanish language pair (the grey numbers correspond to the dictionary sizes).

| Morph           | French–Catalan    |               |                   |               |
|-----------------|-------------------|---------------|-------------------|---------------|
|                 | Normal (In vocab) | Normal (+OOV) | Lexeme (In vocab) | Lexeme (+OOV) |
| ALL             | 40.31 (7845)      | 22.43 (16992) | 74.57             | 45.9          |
| N;SG            | 51.19 (1643)      | 50.12 (1682)  | 86.85             | 86.44         |
| N;PL            | 49.44 (1440)      | 47.46 (1593)  | 90.56             | 89.89         |
| ADJ;FEM;PL      | 57.00 (393)       | 55.83 (403)   | 97.71             | 97.52         |
| ADJ;FEM;SG      | 29.81 (416)       | 29.11 (426)   | 78.85             | 77.93         |
| ADJ;MASC;PL     | 58.06 (403)       | 55.37 (428)   | 97.52             | 97.43         |
| ADJ;MASC;SG     | 47.00 (417)       | 45.62 (434)   | 91.37             | 90.09         |
| 1;PL;PRS;SBJV;V | 15.91 (44)        | 4.22 (379)    | 22.73             | 12.14         |
| 3;PRS;SG;V      | 36.46 (362)       | 35.42 (384)   | 51.38             | 50.26         |
| 3;PST;SBJV;SG;V | 12.05 (83)        | 7.87 (381)    | 26.51             | 19.95         |
| 1;PST;SBJV;SG;V | 4.55 (22)         | 0.53 (380)    | 9.09              | 2.37          |
| 1;PL;PRS;V      | 14.39 (139)       | 9.74 (380)    | 39.57             | 20.79         |
| 2;PRS;SBJV;SG;V | 25.23 (107)       | 15.53 (380)   | 31.78             | 22.37         |
| 2;FUT;SG;V      | 4.35 (23)         | 4.45 (382)    | 17.39             | 9.69          |
| 3;IPFV;PL;PST;V | 46.27 (255)       | 38.85 (381)   | 95.29             | 95.8          |
| 1;PFV;PST;SG;V  | 0.00 (47)         | 2.36 (382)    | 4.26              | 5.5           |
| 3;PFV;PST;SG;V  | 34.03 (288)       | 28.72 (383)   | 50.00             | 41.25         |
| 2;COND;PL;V     | 0.00 (5)          | 11.05 (380)   | 0.00              | 30.53         |
| NFIN;V          | 46.76 (370)       | 46.35 (384)   | 91.08             | 87.24         |
| 2;PFV;PL;PST;V  | -                 | 0.00 (380)    | -                 | 0.53          |
| 3;PFV;PL;PST;V  | 45.49 (233)       | 32.55 (381)   | 92.70             | 91.34         |
| 1;PRS;SBJV;SG;V | 33.01 (312)       | 32.11 (380)   | 48.40             | 47.37         |
| 1;IMP;PL;POS;V  | 14.71 (136)       | 9.74 (380)    | 39.71             | 20.53         |
| 3;COND;PL;V     | 40.17 (117)       | 22.05 (381)   | 63.25             | 54.07         |
| 2;IPFV;PST;SG;V | 13.33 (30)        | 7.59 (382)    | 20.00             | 11.52         |
| 1;PFV;PL;PST;V  | 0.00 (2)          | 1.84 (380)    | 0.00              | 3.42          |
| 3;COND;SG;V     | 25.67 (187)       | 16.45 (383)   | 41.18             | 31.07         |
| 2;PRS;SG;V      | 25.95 (185)       | 16.71 (383)   | 34.59             | 25.85         |
| 1;FUT;PL;V      | 13.04 (46)        | 12.63 (380)   | 28.26             | 32.63         |
| 1;COND;PL;V     | 40.00 (5)         | 18.95 (380)   | 60.00             | 53.68         |
| 2;PST;SBJV;SG;V | 0.00 (3)          | 0.00 (380)    | 33.33             | 1.05          |
| 3;FUT;PL;V      | 32.48 (157)       | 24.93 (381)   | 54.14             | 58.27         |
| 2;PL;PRS;V      | 15.56 (135)       | 8.95 (380)    | 26.67             | 15.53         |
| 2;PL;PST;SBJV;V | 100.00 (1)        | 0.53 (379)    | 100.00            | 5.54          |
| 2;IMP;PL;POS;V  | 15.56 (135)       | 8.95 (380)    | 25.93             | 15.26         |
| 1;IPFV;PST;SG;V | 10.11 (89)        | 7.59 (382)    | 17.98             | 11.52         |
| 2;PL;PRS;SBJV;V | 22.22 (36)        | 5.28 (379)    | 36.11             | 12.14         |
| 1;FUT;SG;V      | 24.29 (70)        | 20.42 (382)   | 44.29             | 50.26         |
| 3;PL;PRS;SBJV;V | 41.89 (265)       | 37.37 (380)   | 80.00             | 73.42         |
| 3;PL;PST;SBJV;V | 28.57 (28)        | 2.89 (380)    | 53.57             | 12.89         |
| 3;IPFV;PST;SG;V | 44.18 (292)       | 38.90 (383)   | 86.30             | 83.29         |
| 2;PFV;PST;SG;V  | -                 | 2.62 (382)    | -                 | 12.3          |
| 2;IPFV;PL;PST;V | 0.00 (3)          | 5.26 (380)    | 0.00              | 12.37         |
| 2;IMP;POS;SG;V  | 32.58 (356)       | 31.41 (382)   | 48.03             | 46.86         |
| 1;COND;SG;V     | 0.00 (67)         | 0.79 (382)    | 5.97              | 1.05          |
| 3;PRS;SBJV;SG;V | 32.91 (313)       | 32.02 (381)   | 48.56             | 47.51         |
| 3;PL;PRS;V      | 39.82 (329)       | 37.53 (381)   | 79.94             | 74.02         |
| 2;COND;SG;V     | 0.00 (17)         | 0.79 (382)    | 0.00              | 1.05          |
| 1;PRS;SG;V      | 32.95 (261)       | 31.33 (383)   | 48.66             | 47            |
| 1;PL;PST;SBJV;V | 0.00 (1)          | 0.26 (379)    | 0.00              | 1.32          |
| 1;IPFV;PL;PST;V | 5.26 (19)         | 4.47 (380)    | 15.79             | 12.37         |
| 3;FUT;SG;V      | 40.79 (228)       | 34.20 (383)   | 69.30             | 72.06         |
| 2;FUT;PL;V      | 0.00 (21)         | 2.63 (380)    | 0.00              | 5             |

Table 104: The performance of [Ruder et al. \(2018\)](#)’s model on translating words belonging to a specific morphological category for the French–Catalan language pair (the grey numbers correspond to the dictionary sizes).

| Morph           | Normal (In vocab) | French–Italian |                   |               |
|-----------------|-------------------|----------------|-------------------|---------------|
|                 |                   | Normal (+OOV)  | Lexeme (In vocab) | Lexeme (+OOV) |
| ALL             | 48.35 (9891)      | 26.84 (22052)  | 79.87             | 50.86         |
| N;PL            | 51.47 (1943)      | 47.57 (2281)   | 86.93             | 84.26         |
| N;SG            | 58.25 (2388)      | 56.28 (2491)   | 90.87             | 90.49         |
| 1;PFV;PL;PST;V  | 0.00 (3)          | 0.21 (477)     | 33.33             | 1.47          |
| 1;IMP;PL;POS;V  | 28.22 (163)       | 13.69 (482)    | 56.44             | 35.27         |
| 2;PL;PRS;V      | 2.55 (196)        | 0.62 (481)     | 4.59              | 2.08          |
| 3;PRS;SBJV;SG;V | 44.33 (397)       | 41.53 (484)    | 61.71             | 56.4          |
| 1;PST;SBJV;SG;V | 9.09 (11)         | 1.89 (477)     | 18.18             | 4.82          |
| 1;PL;PST;SBJV;V | 66.67 (3)         | 0.42 (476)     | 100.00            | 3.57          |
| 2;COND;PL;V     | 0.00 (4)          | 0.21 (480)     | 0.00              | 1.04          |
| NFIN;V          | 51.08 (462)       | 49.07 (485)    | 94.16             | 90.93         |
| 3;IPFV;PST;SG;V | 52.12 (330)       | 44.74 (485)    | 85.45             | 78.14         |
| 2;PRS;SG;V      | 21.09 (256)       | 13.49 (482)    | 37.11             | 21.58         |
| 2;PFV;PST;SG;V  | 20.00 (20)        | 2.09 (478)     | 25.00             | 5.44          |
| 1;FUT;PL;V      | 29.27 (41)        | 19.17 (480)    | 48.78             | 43.54         |
| 2;PST;SBJV;SG;V | -                 | 0.21 (477)     | -                 | 2.31          |
| 2;FUT;PL;V      | 8.70 (23)         | 2.92 (480)     | 17.39             | 11.25         |
| 2;COND;SG;V     | 29.73 (37)        | 16.84 (481)    | 51.35             | 55.72         |
| 3;FUT;SG;V      | 46.24 (266)       | 37.81 (484)    | 84.21             | 78.1          |
| 2;IPFV;PL;PST;V | 0.00 (15)         | 0.00 (481)     | 0.00              | 0.62          |
| 1;IPFV;PL;PST;V | 17.39 (23)        | 4.37 (481)     | 21.74             | 19.33         |
| 3;PFV;PST;SG;V  | 36.91 (363)       | 29.94 (481)    | 63.91             | 52.81         |
| 2;IMP;POS;SG;V  | 45.12 (430)       | 41.29 (482)    | 61.86             | 57.05         |
| 1;COND;PL;V     | 0.00 (5)          | 9.38 (480)     | 20.00             | 34.58         |
| 3;PL;PRS;V      | 45.68 (405)       | 40.66 (482)    | 76.30             | 66.18         |
| 1;COND;SG;V     | 23.94 (71)        | 16.84 (481)    | 56.34             | 55.93         |
| 2;IPFV;PST;SG;V | 20.00 (45)        | 20.33 (482)    | 35.56             | 39.21         |
| 3;COND;PL;V     | 22.81 (114)       | 22.45 (481)    | 48.25             | 67.98         |
| 1;PRS;SBJV;SG;V | 44.56 (395)       | 41.58 (481)    | 61.77             | 56.34         |
| 3;IPFV;PL;PST;V | 54.74 (274)       | 45.02 (482)    | 95.99             | 95.64         |
| 2;PFV;PL;PST;V  | -                 | 0.21 (477)     | -                 | 0.84          |
| 1;PRS;SG;V      | 44.33 (379)       | 41.70 (482)    | 61.21             | 57.47         |
| 3;COND;SG;V     | 22.16 (185)       | 20.87 (484)    | 46.49             | 61.78         |
| 1;IPFV;PST;SG;V | 19.18 (73)        | 20.33 (482)    | 36.99             | 39.21         |
| 2;PL;PST;SBJV;V | 0.00 (1)          | 0.00 (476)     | 0.00              | 0.21          |
| 2;PL;PRS;SBJV;V | 0.00 (29)         | 0.00 (480)     | 0.00              | 0.62          |
| 1;FUT;SG;V      | 18.89 (90)        | 17.88 (481)    | 46.67             | 45.53         |
| 2;FUT;SG;V      | 0.00 (23)         | 1.04 (481)     | 17.39             | 9.98          |
| 3;PST;SBJV;SG;V | 21.74 (69)        | 18.96 (480)    | 43.48             | 35.83         |
| 1;PFV;PST;SG;V  | 16.28 (43)        | 15.48 (478)    | 23.26             | 22.8          |
| 3;PFV;PL;PST;V  | 48.47 (262)       | 36.61 (478)    | 96.18             | 97.28         |
| 3;PRS;SG;V      | 47.35 (452)       | 44.74 (485)    | 64.82             | 61.03         |
| 2;IMP;PL;POS;V  | 2.55 (196)        | 0.62 (482)     | 4.59              | 2.28          |
| 3;PL;PST;SBJV;V | 50.00 (20)        | 4.40 (477)     | 65.00             | 11.32         |
| 1;PL;PRS;V      | 28.22 (163)       | 13.72 (481)    | 56.44             | 35.34         |
| 1;PL;PRS;SBJV;V | 15.00 (40)        | 4.38 (480)     | 27.50             | 19.58         |
| 3;FUT;PL;V      | 50.58 (172)       | 37.63 (481)    | 94.77             | 96.47         |
| 2;PRS;SBJV;SG;V | 22.37 (219)       | 12.27 (481)    | 37.90             | 18.71         |
| 3;PL;PRS;SBJV;V | 46.60 (309)       | 40.54 (481)    | 76.38             | 66.11         |
| ADJ;MASC;PL     | 68.26 (501)       | 66.35 (523)    | 95.41             | 95.41         |
| ADJ;MASC;SG     | 66.73 (514)       | 65.28 (527)    | 95.72             | 95.45         |
| ADJ;FEM;SG      | 65.43 (512)       | 64.48 (518)    | 94.14             | 93.82         |
| ADJ;FEM;PL      | 63.75 (491)       | 63.33 (499)    | 95.72             | 95.79         |

Table 105: The performance of [Ruder et al. \(2018\)](#)’s model on translating words belonging to a specific morphological category for the French–Italian language pair (the grey numbers correspond to the dictionary sizes).



| Morph           | French–Portuguese |               |                   |               |
|-----------------|-------------------|---------------|-------------------|---------------|
|                 | Normal (In vocab) | Normal (+OOV) | Lexeme (In vocab) | Lexeme (+OOV) |
| ALL             | 47.42 (8930)      | 29.73 (17536) | 76.94             | 52.5          |
| ADJ;MASC;SG     | 63.03 (495)       | 61.74 (507)   | 93.94             | 93.69         |
| ADJ;FEM;PL      | 62.77 (470)       | 61.46 (480)   | 98.51             | 98.33         |
| ADJ;FEM;SG      | 64.23 (492)       | 63.71 (496)   | 94.72             | 94.56         |
| ADJ;MASC;PL     | 63.39 (478)       | 60.08 (501)   | 97.49             | 97.41         |
| N;SG            | 53.00 (2151)      | 51.58 (2222)  | 87.59             | 86.81         |
| N;PL            | 52.30 (1786)      | 49.29 (2039)  | 88.63             | 87.3          |
| 3;FUT;PL;V      | 34.09 (132)       | 31.28 (438)   | 51.52             | 64.84         |
| 3;IPFV;PST;SG;V | 49.84 (309)       | 42.95 (440)   | 82.52             | 81.14         |
| NFIN;V          | 58.29 (422)       | 56.01 (441)   | 93.60             | 87.76         |
| 2;PRS;SBJV;SG;V | 28.78 (139)       | 24.31 (436)   | 43.17             | 34.86         |
| 2;IMP;PL;POS;V  | 0.76 (132)        | 0.69 (436)    | 0.76              | 0.92          |
| 2;FUT;SG;V      | 10.53 (19)        | 13.96 (437)   | 10.53             | 25.86         |
| 2;PL;PRS;SBJV;V | 0.00 (12)         | 0.46 (436)    | 0.00              | 0.92          |
| 1;PL;PRS;V      | 39.57 (139)       | 19.45 (437)   | 60.43             | 37.3          |
| 3;PFV;PST;SG;V  | 36.12 (335)       | 28.21 (436)   | 51.64             | 41.51         |
| 2;PFV;PST;SG;V  | 8.70 (23)         | 1.15 (434)    | 21.74             | 2.07          |
| 2;FUT;PL;V      | 0.00 (13)         | 0.00 (437)    | 0.00              | 0             |
| 2;COND;SG;V     | 3.12 (32)         | 0.23 (437)    | 3.12              | 0.69          |
| 3;PL;PRS;SBJV;V | 48.32 (298)       | 40.73 (437)   | 73.49             | 68.19         |
| 1;IPFV;PL;PST;V | 14.81 (27)        | 5.03 (437)    | 29.63             | 11.67         |
| 3;PRS;SG;V      | 40.53 (417)       | 39.32 (440)   | 58.27             | 54.55         |
| 2;PL;PRS;V      | 1.27 (79)         | 0.69 (437)    | 1.27              | 0.92          |
| 1;PFV;PL;PST;V  | 33.33 (6)         | 2.53 (434)    | 83.33             | 9.22          |
| 1;IPFV;PST;SG;V | 6.59 (91)         | 6.86 (437)    | 14.29             | 12.36         |
| 1;PL;PRS;SBJV;V | 18.75 (32)        | 5.05 (436)    | 31.25             | 11.7          |
| 1;PRS;SBJV;SG;V | 36.63 (374)       | 34.86 (436)   | 54.28             | 49.77         |
| 1;COND;PL;V     | 20.00 (5)         | 16.25 (437)   | 20.00             | 33.18         |
| 3;COND;PL;V     | 44.64 (112)       | 27.17 (438)   | 68.75             | 56.85         |
| 3;PFV;PL;PST;V  | 51.01 (247)       | 34.56 (434)   | 81.78             | 73.5          |
| 2;PRS;SG;V      | 30.50 (200)       | 26.32 (437)   | 45.50             | 37.99         |
| 3;FUT;SG;V      | 36.95 (203)       | 32.50 (440)   | 52.71             | 57.27         |
| 1;FUT;PL;V      | 38.89 (36)        | 29.98 (437)   | 41.67             | 55.84         |
| 3;COND;SG;V     | 27.08 (192)       | 18.18 (440)   | 39.06             | 27.27         |
| 1;IMP;PL;POS;V  | 42.39 (92)        | 19.50 (436)   | 58.70             | 37.39         |
| 2;PFV;PL;PST;V  | 0.00 (2)          | 0.00 (434)    | 0.00              | 1.38          |
| 2;IMP;POS;SG;V  | 37.80 (410)       | 36.93 (436)   | 56.34             | 51.83         |
| 3;PL;PRS;V      | 46.69 (362)       | 40.87 (438)   | 73.48             | 68.26         |
| 1;PRS;SG;V      | 37.29 (354)       | 36.84 (437)   | 56.21             | 51.72         |
| 3;PRS;SBJV;SG;V | 36.87 (377)       | 35.08 (439)   | 54.38             | 49.89         |
| 2;IPFV;PST;SG;V | 2.94 (34)         | 6.86 (437)    | 11.76             | 12.36         |
| 1;COND;SG;V     | 1.33 (75)         | 0.23 (437)    | 2.67              | 0.69          |
| 1;FUT;SG;V      | 45.07 (71)        | 39.82 (437)   | 71.83             | 82.38         |
| 2;IPFV;PL;PST;V | 0.00 (26)         | 0.46 (437)    | 0.00              | 0.92          |
| 3;IPFV;PL;PST;V | 55.39 (269)       | 45.43 (438)   | 94.80             | 95.66         |
| 1;PFV;PST;SG;V  | 5.66 (53)         | 3.23 (434)    | 15.09             | 6.68          |
| 2;COND;PL;V     | -                 | 0.23 (437)    | -                 | 0.46          |

Table 106: The performance of [Ruder et al. \(2018\)](#)’s model on translating words belonging to a specific morphological category for the French–Portuguese language pair (the grey numbers correspond to the dictionary sizes).

| Morph           | French–Spanish    |               |                   |               |
|-----------------|-------------------|---------------|-------------------|---------------|
|                 | Normal (In vocab) | Normal (+OOV) | Lexeme (In vocab) | Lexeme (+OOV) |
| ALL             | 47.83 (9770)      | 26.69 (21087) | 77.97             | 47.88         |
| N;PL            | 53.55 (1873)      | 49.91 (2154)  | 87.83             | 86.95         |
| N;SG            | 56.74 (2242)      | 55.13 (2311)  | 89.61             | 89.27         |
| 1;PFV;PST;SG;V  | 5.26 (57)         | 1.32 (455)    | 7.02              | 3.74          |
| 2;COND;SG;V     | 16.28 (43)        | 1.54 (455)    | 18.60             | 1.76          |
| 3;FUT;PL;V      | 34.68 (173)       | 23.25 (456)   | 51.45             | 46.93         |
| 1;PRS;SBJV;SG;V | 41.71 (386)       | 38.02 (455)   | 54.15             | 48.57         |
| 2;COND;PL;V     | 0.00 (2)          | 13.19 (455)   | 50.00             | 30.99         |
| 2;PL;PRS;SBJV;V | 0.00 (34)         | 0.66 (455)    | 2.94              | 2.42          |
| 1;FUT;PL;V      | 42.86 (42)        | 24.18 (455)   | 64.29             | 48.79         |
| 2;PRS;SG;V      | 35.71 (224)       | 25.93 (455)   | 48.21             | 38.9          |
| 3;COND;SG;V     | 40.95 (210)       | 30.63 (457)   | 71.90             | 56.02         |
| 2;IMP;PL;POS;V  | 1.54 (130)        | 1.98 (455)    | 1.54              | 2.86          |
| 1;COND;PL;V     | 0.00 (12)         | 7.25 (455)    | 8.33              | 22.86         |
| 3;PRS;SBJV;SG;V | 41.75 (388)       | 38.07 (457)   | 54.12             | 48.58         |
| 3;IPFV;PL;PST;V | 54.61 (271)       | 42.32 (456)   | 98.52             | 97.81         |
| 1;FUT;SG;V      | 44.83 (87)        | 31.21 (455)   | 68.97             | 58.02         |
| 2;PL;PST;SBJV;V | -                 | 0.00 (455)    | -                 | 0.22          |
| 2;PL;PRS;V      | 0.00 (91)         | 1.98 (455)    | 0.00              | 2.86          |
| 2;FUT;SG;V      | 12.50 (32)        | 5.05 (455)    | 12.50             | 10.99         |
| 3;PL;PRS;V      | 45.74 (387)       | 41.01 (456)   | 70.80             | 65.57         |
| 1;PL;PST;SBJV;V | -                 | 0.22 (455)    | -                 | 1.98          |
| 2;IPFV;PST;SG;V | 24.00 (50)        | 13.41 (455)   | 26.00             | 18.68         |
| 2;FUT;PL;V      | 0.00 (15)         | 7.69 (455)    | 0.00              | 14.73         |
| NFIN;V          | 50.57 (437)       | 49.02 (457)   | 91.53             | 88.62         |
| 3;PL;PST;SBJV;V | 38.46 (26)        | 3.29 (456)    | 57.69             | 6.8           |
| 2;PFV;PST;SG;V  | 11.11 (45)        | 1.32 (455)    | 11.11             | 2.2           |
| 3;FUT;SG;V      | 33.84 (263)       | 26.26 (457)   | 51.33             | 48.36         |
| 3;IPFV;PST;SG;V | 56.29 (334)       | 47.48 (457)   | 88.92             | 84.68         |
| 2;PFV;PL;PST;V  | 0.00 (1)          | 0.00 (455)    | 0.00              | 0             |
| 2;PRS;SBJV;SG;V | 36.07 (183)       | 23.96 (455)   | 53.01             | 36.92         |
| 1;PL;PRS;V      | 30.77 (156)       | 17.14 (455)   | 56.41             | 32.97         |
| 1;PL;PRS;SBJV;V | 20.51 (39)        | 3.74 (455)    | 23.08             | 10.11         |
| 3;PST;SBJV;SG;V | 7.94 (63)         | 7.44 (457)    | 15.87             | 15.97         |
| 1;IPFV;PST;SG;V | 14.94 (87)        | 13.41 (455)   | 21.84             | 18.68         |
| 2;IMP;POS;SG;V  | 41.45 (427)       | 38.68 (455)   | 52.93             | 49.01         |
| 1;IPFV;PL;PST;V | 20.69 (29)        | 3.74 (455)    | 20.69             | 10.11         |
| 2;IPFV;PL;PST;V | 0.00 (7)          | 0.66 (455)    | 14.29             | 2.42          |
| 1;IMP;PL;POS;V  | 32.37 (139)       | 17.14 (455)   | 55.40             | 32.97         |
| 1;PST;SBJV;SG;V | 10.00 (20)        | 2.42 (455)    | 10.00             | 4.4           |
| 3;PFV;PL;PST;V  | 47.60 (250)       | 36.18 (456)   | 88.80             | 85.75         |
| 3;PFV;PST;SG;V  | 35.75 (358)       | 30.42 (457)   | 51.40             | 43.76         |
| 2;PST;SBJV;SG;V | 0.00 (3)          | 3.52 (455)    | 0.00              | 5.49          |
| 1;COND;SG;V     | 8.86 (79)         | 1.54 (455)    | 12.66             | 1.76          |
| 1;PFV;PL;PST;V  | 20.00 (5)         | 1.54 (455)    | 20.00             | 3.74          |
| 3;COND;PL;V     | 50.00 (116)       | 30.26 (456)   | 86.21             | 77.63         |
| 1;PRS;SG;V      | 41.65 (401)       | 38.68 (455)   | 54.36             | 49.01         |
| 3;PL;PRS;SBJV;V | 47.34 (357)       | 40.79 (456)   | 71.71             | 65.35         |
| 3;PRS;SG;V      | 44.37 (435)       | 42.67 (457)   | 56.78             | 53.17         |
| ADJ;FEM;SG      | 59.17 (578)       | 58.56 (584)   | 92.73             | 92.64         |
| ADJ;MASC;PL     | 60.99 (564)       | 58.40 (589)   | 96.81             | 96.77         |
| ADJ;MASC;SG     | 62.74 (577)       | 60.88 (593)   | 94.11             | 93.59         |
| ADJ;FEM;PL      | 61.29 (558)       | 59.96 (567)   | 97.49             | 97.53         |

Table 107: The performance of [Ruder et al. \(2018\)](#)’s model on translating words belonging to a specific morphological category for the French–Spanish language pair (the grey numbers correspond to the dictionary sizes).

| Morph           | Italian–Catalan   |               |                   |               |
|-----------------|-------------------|---------------|-------------------|---------------|
|                 | Normal (In vocab) | Normal (+OOV) | Lexeme (In vocab) | Lexeme (+OOV) |
| ALL             | 35.51 (9035)      | 17.81 (22636) | 73.50             | 44.96         |
| N;SG            | 43.89 (2153)      | 41.83 (2278)  | 83.74             | 82.79         |
| N;PL            | 42.70 (1665)      | 38.63 (1983)  | 88.89             | 87.34         |
| 2;FUT;SG;V      | 5.56 (18)         | 2.75 (473)    | 5.56              | 11.63         |
| 1;COND;PL;V     | 33.33 (9)         | 19.45 (473)   | 77.78             | 74.42         |
| 3;PFV;PST;SG;V  | 25.99 (327)       | 20.51 (473)   | 45.57             | 38.69         |
| 3;IMP;PL;POS;V  | 17.72 (158)       | 9.32 (472)    | 28.48             | 18.01         |
| 1;PRS;SBJV;SG;V | 27.88 (269)       | 18.60 (473)   | 45.35             | 30.66         |
| 2;FUT;PL;V      | 7.69 (13)         | 2.33 (473)    | 7.69              | 6.55          |
| 1;IPFV;PL;PST;V | 11.11 (9)         | 5.06 (474)    | 55.56             | 28.48         |
| 3;PRS;SBJV;SG;V | 27.88 (269)       | 18.60 (473)   | 45.35             | 30.66         |
| 1;PL;PST;SBJV;V | 0.00 (7)          | 5.07 (473)    | 0.00              | 17.34         |
| 2;PL;PST;SBJV;V | 0.00 (1)          | 0.00 (473)    | 0.00              | 2.11          |
| 1;PRS;SG;V      | 23.15 (216)       | 14.59 (473)   | 40.28             | 22.83         |
| 1;PL;PRS;SBJV;V | 25.23 (107)       | 5.30 (472)    | 52.34             | 15.89         |
| 2;PFV;PST;SG;V  | -                 | 0.21 (473)    | -                 | 1.48          |
| 2;COND;SG;V     | 0.00 (5)          | 0.00 (473)    | 0.00              | 0             |
| 3;IPFV;PST;SG;V | 40.60 (298)       | 31.22 (474)   | 81.54             | 76.37         |
| 1;PL;PRS;V      | 25.00 (108)       | 5.30 (472)    | 52.78             | 15.89         |
| 2;IPFV;PST;SG;V | 0.00 (3)          | 2.74 (474)    | 0.00              | 5.06          |
| 2;IPFV;PL;PST;V | 0.00 (1)          | 0.00 (474)    | 0.00              | 0.84          |
| 3;COND;PL;V     | 10.71 (56)        | 5.71 (473)    | 42.86             | 51.37         |
| 2;PFV;PL;PST;V  | -                 | 0.00 (473)    | -                 | 2.11          |
| 3;FUT;PL;V      | 45.54 (112)       | 21.99 (473)   | 83.93             | 87.1          |
| 3;FUT;SG;V      | 43.16 (190)       | 31.08 (473)   | 90.53             | 91.97         |
| 2;COND;PL;V     | 50.00 (2)         | 7.40 (473)    | 50.00             | 27.48         |
| 1;FUT;SG;V      | 38.46 (39)        | 13.53 (473)   | 58.97             | 32.35         |
| NFIN;V          | 39.11 (427)       | 35.86 (474)   | 91.80             | 85.86         |
| 3;IMP;POS;SG;V  | 27.99 (268)       | 18.64 (472)   | 45.52             | 30.72         |
| 3;PL;PRS;SBJV;V | 17.61 (159)       | 9.30 (473)    | 28.30             | 17.97         |
| 1;PFV;PST;SG;V  | 2.38 (42)         | 2.54 (473)    | 4.76              | 3.59          |
| 3;PFV;PL;PST;V  | 37.25 (255)       | 29.39 (473)   | 90.59             | 89.85         |
| 2;IMP;PL;POS;V  | 1.66 (181)        | 2.11 (473)    | 3.87              | 3.17          |
| 3;PL;PRS;V      | 32.29 (350)       | 24.74 (473)   | 74.29             | 62.16         |
| 2;PST;SBJV;SG;V | 22.22 (9)         | 2.75 (473)    | 22.22             | 7.82          |
| 2;IMP;POS;SG;V  | 30.19 (361)       | 23.68 (473)   | 49.86             | 37.42         |
| 2;PRS;SG;V      | 23.71 (194)       | 14.38 (473)   | 41.24             | 24.1          |
| 3;IPFV;PL;PST;V | 42.74 (248)       | 31.22 (474)   | 94.76             | 95.99         |
| 3;PST;SBJV;SG;V | 24.42 (172)       | 14.38 (473)   | 39.53             | 30.44         |
| 1;IPFV;PST;SG;V | 18.60 (43)        | 5.91 (474)    | 25.58             | 12.03         |
| 1;COND;SG;V     | 0.00 (53)         | 0.00 (473)    | 3.77              | 0             |
| 2;PL;PRS;V      | 1.65 (182)        | 2.11 (473)    | 4.40              | 3.38          |
| 3;COND;SG;V     | 8.62 (116)        | 3.59 (473)    | 30.17             | 12.68         |
| 1;IMP;PL;POS;V  | 25.47 (106)       | 5.30 (472)    | 51.89             | 15.89         |
| 3;PRS;SG;V      | 33.81 (420)       | 30.80 (474)   | 56.19             | 50.63         |
| 2;PRS;SBJV;SG;V | 28.47 (144)       | 18.60 (473)   | 52.08             | 30.66         |
| 1;PFV;PL;PST;V  | 0.00 (2)          | 1.06 (473)    | 0.00              | 1.69          |
| 2;PL;PRS;SBJV;V | 0.00 (31)         | 0.00 (472)    | 3.23              | 1.06          |
| 1;PST;SBJV;SG;V | 8.00 (25)         | 2.75 (473)    | 8.00              | 7.82          |
| 3;PL;PST;SBJV;V | 31.62 (117)       | 19.45 (473)   | 73.50             | 77.8          |
| 1;FUT;PL;V      | 37.14 (35)        | 17.97 (473)   | 48.57             | 54.12         |
| ADJ;MASC;SG     | 49.04 (416)       | 47.14 (437)   | 92.55             | 91.99         |
| ADJ;MASC;PL     | 52.49 (402)       | 49.76 (422)   | 93.28             | 92.42         |
| ADJ;FEM;SG      | 21.50 (414)       | 21.09 (422)   | 74.64             | 74.41         |
| ADJ;FEM;PL      | 50.66 (381)       | 50.13 (385)   | 94.23             | 93.25         |

Table 108: The performance of [Ruder et al. \(2018\)](#)’s model on translating words belonging to a specific morphological category for the Italian–Catalan language pair (the grey numbers correspond to the dictionary sizes).

| Morph           | Italian–French    |               |                   |               |
|-----------------|-------------------|---------------|-------------------|---------------|
|                 | Normal (In vocab) | Normal (+OOV) | Lexeme (In vocab) | Lexeme (+OOV) |
| ALL             | 40.55 (12595)     | 20.99 (31419) | 76.77             | 49.78         |
| N;SG            | 48.45 (3106)      | 45.13 (3355)  | 87.15             | 85.84         |
| N;PL            | 49.81 (2333)      | 43.68 (2928)  | 89.63             | 87.53         |
| 3;PL;PST;SBJV;V | 0.00 (74)         | 0.00 (645)    | 0.00              | 0             |
| 1;PL;PST;SBJV;V | 0.00 (2)          | 0.00 (643)    | 0.00              | 0             |
| 1;FUT;PL;V      | 12.12 (33)        | 14.46 (643)   | 39.39             | 50.54         |
| 1;COND;PL;V     | 0.00 (9)          | 4.98 (643)    | 0.00              | 23.48         |
| 3;PL;PRS;V      | 40.59 (473)       | 33.02 (645)   | 83.93             | 71.47         |
| 1;COND;SG;V     | 35.38 (65)        | 23.64 (643)   | 80.00             | 83.67         |
| 1;PL;PRS;V      | 17.65 (153)       | 8.79 (637)    | 47.71             | 25.27         |
| 3;PFV;PST;SG;V  | 27.01 (448)       | 20.12 (646)   | 47.32             | 35.76         |
| 2;PFV;PST;SG;V  | 14.29 (7)         | 1.87 (643)    | 14.29             | 4.82          |
| NFIN;V          | 44.85 (573)       | 40.56 (646)   | 91.97             | 88.24         |
| 2;IMP;POS;SG;V  | 28.13 (487)       | 22.40 (643)   | 46.00             | 35.93         |
| 1;PRS;SG;V      | 23.72 (371)       | 14.77 (643)   | 38.27             | 23.79         |
| 1;IMP;PL;POS;V  | 17.65 (153)       | 8.79 (637)    | 47.71             | 25.27         |
| 3;PL;PRS;SBJV;V | 14.09 (220)       | 7.61 (644)    | 32.27             | 19.57         |
| 1;FUT;SG;V      | 39.71 (68)        | 18.35 (643)   | 77.94             | 55.99         |
| 2;IMP;PL;POS;V  | 2.27 (353)        | 2.02 (643)    | 7.08              | 5.75          |
| 1;PRS;SBJV;SG;V | 30.22 (417)       | 21.50 (642)   | 47.48             | 37.85         |
| 2;PFV;PL;PST;V  | 0.00 (3)          | 0.47 (643)    | 0.00              | 5.13          |
| 3;COND;PL;V     | 49.32 (73)        | 23.41 (645)   | 95.89             | 98.91         |
| 3;COND;SG;V     | 48.76 (121)       | 26.32 (646)   | 94.21             | 92.26         |
| 3;FUT;SG;V      | 40.00 (265)       | 27.86 (646)   | 84.53             | 71.52         |
| 2;PST;SBJV;SG;V | 0.00 (3)          | 1.87 (643)    | 0.00              | 4.51          |
| 3;PRS;SBJV;SG;V | 30.24 (420)       | 21.55 (645)   | 47.38             | 37.83         |
| 2;FUT;SG;V      | 11.11 (18)        | 0.62 (643)    | 11.11             | 1.56          |
| 1;PL;PRS;SBJV;V | 15.60 (109)       | 8.79 (637)    | 51.38             | 25.27         |
| 2;COND;SG;V     | 43.75 (16)        | 17.42 (643)   | 68.75             | 64.07         |
| 2;IPFV;PL;PST;V | -                 | 0.16 (643)    | -                 | 0.93          |
| 2;PRS;SG;V      | 29.94 (354)       | 19.16 (642)   | 48.02             | 33.49         |
| 3;IPFV;PST;SG;V | 43.38 (385)       | 33.90 (646)   | 86.23             | 78.64         |
| 3;FUT;PL;V      | 47.06 (153)       | 23.57 (645)   | 98.69             | 98.91         |
| 3;PFV;PL;PST;V  | 37.22 (352)       | 29.92 (645)   | 94.89             | 95.81         |
| 2;PRS;SBJV;SG;V | 31.61 (367)       | 21.50 (642)   | 49.32             | 37.85         |
| 1;IPFV;PL;PST;V | 0.00 (9)          | 0.47 (643)    | 0.00              | 1.09          |
| 2;IPFV;PST;SG;V | 18.18 (22)        | 2.64 (643)    | 36.36             | 7.62          |
| 2;COND;PL;V     | 0.00 (6)          | 1.24 (643)    | 0.00              | 7             |
| 2;FUT;PL;V      | 25.00 (12)        | 8.86 (643)    | 25.00             | 26.91         |
| 1;PFV;PST;SG;V  | 19.05 (63)        | 7.15 (643)    | 23.81             | 13.37         |
| 3;PRS;SG;V      | 32.33 (566)       | 29.26 (646)   | 53.71             | 46.75         |
| 2;PL;PRS;SBJV;V | 0.00 (29)         | 0.31 (637)    | 0.00              | 2.2           |
| 1;PST;SBJV;SG;V | 0.00 (8)          | 1.87 (643)    | 0.00              | 4.51          |
| 1;IPFV;PST;SG;V | 26.83 (41)        | 10.89 (643)   | 34.15             | 25.97         |
| 2;PL;PRS;V      | 2.55 (353)        | 2.18 (643)    | 7.37              | 5.75          |
| 2;PL;PST;SBJV;V | 0.00 (2)          | 0.47 (643)    | 0.00              | 5.13          |
| 1;PFV;PL;PST;V  | 0.00 (8)          | 0.62 (643)    | 12.50             | 3.27          |
| 3;PST;SBJV;SG;V | 3.39 (177)        | 6.19 (646)    | 7.34              | 20.12         |
| 3;IPFV;PL;PST;V | 44.44 (324)       | 32.40 (645)   | 98.15             | 95.81         |
| ADJ;FEM;SG      | 53.41 (631)       | 52.32 (646)   | 94.29             | 94.12         |
| ADJ;MASC;SG     | 55.02 (638)       | 52.83 (672)   | 92.32             | 92.26         |
| ADJ;FEM;PL      | 57.36 (598)       | 57.07 (601)   | 94.98             | 94.68         |
| ADJ;MASC;PL     | 56.93 (606)       | 54.42 (645)   | 93.73             | 92.71         |

Table 109: The performance of [Ruder et al. \(2018\)](#)’s model on translating words belonging to a specific morphological category for the Italian–French language pair (the grey numbers correspond to the dictionary sizes).

| Italian–Portuguese |                   |               |                   |               |
|--------------------|-------------------|---------------|-------------------|---------------|
| Morph              | Normal (In vocab) | Normal (+OOV) | Lexeme (In vocab) | Lexeme (+OOV) |
| ALL                | 42.59 (10072)     | 20.40 (25704) | 76.74             | 46.63         |
| N;PL               | 46.54 (1968)      | 40.62 (2452)  | 86.38             | 85.11         |
| N;SG               | 47.51 (2650)      | 44.31 (2846)  | 85.02             | 84.01         |
| 2;COND;SG;V        | 0.00 (4)          | 0.00 (586)    | 0.00              | 0             |
| 1;PL;PRS;V         | 28.57 (112)       | 11.74 (579)   | 61.61             | 28.84         |
| 1;FUT;PL;V         | 50.00 (26)        | 20.99 (586)   | 61.54             | 71.16         |
| 3;PRS;SBJV;SG;V    | 24.60 (313)       | 17.06 (586)   | 38.34             | 26.62         |
| 1;IPFV;PST;SG;V    | 13.16 (38)        | 6.81 (587)    | 13.16             | 11.93         |
| 3;IMP;PL;POS;V     | 17.28 (162)       | 7.68 (586)    | 29.63             | 17.41         |
| 3;PRS;SG;V         | 38.83 (479)       | 32.20 (587)   | 58.04             | 48.04         |
| 3;COND;SG;V        | 13.51 (111)       | 4.27 (586)    | 26.13             | 9.73          |
| 3;IMP;POS;SG;V     | 24.60 (313)       | 17.06 (586)   | 38.34             | 26.62         |
| 1;PRS;SG;V         | 31.43 (280)       | 19.49 (585)   | 43.21             | 28.89         |
| 1;COND;PL;V        | 33.33 (12)        | 14.16 (586)   | 33.33             | 43.52         |
| 3;IPFV;PST;SG;V    | 50.32 (312)       | 34.75 (587)   | 78.21             | 75.81         |
| 3;PL;PRS;SBJV;V    | 17.28 (162)       | 7.68 (586)    | 29.63             | 17.41         |
| 3;PFV;PL;PST;V     | 51.03 (292)       | 31.69 (587)   | 94.52             | 90.46         |
| 1;IPFV;PL;PST;V    | 50.00 (8)         | 9.03 (587)    | 62.50             | 45.49         |
| 1;PL;PRS;SBJV;V    | 33.90 (59)        | 11.74 (579)   | 61.02             | 28.84         |
| 2;IPFV;PL;PST;V    | 0.00 (3)          | 0.17 (587)    | 0.00              | 1.19          |
| 1;COND;SG;V        | 0.00 (69)         | 0.00 (586)    | 0.00              | 0             |
| 2;PRS;SBJV;SG;V    | 25.87 (201)       | 17.06 (586)   | 40.80             | 26.62         |
| 3;FUT;SG;V         | 42.77 (173)       | 26.96 (586)   | 80.35             | 83.62         |
| 3;PFV;PST;SG;V     | 40.41 (386)       | 27.94 (587)   | 65.28             | 51.96         |
| 1;PRS;SBJV;SG;V    | 24.60 (313)       | 17.06 (586)   | 38.34             | 26.62         |
| 3;FUT;PL;V         | 38.04 (92)        | 16.04 (586)   | 91.30             | 92.83         |
| 3;COND;PL;V        | 18.64 (59)        | 5.46 (586)    | 45.76             | 32.76         |
| 1;PFV;PST;SG;V     | 8.47 (59)         | 1.19 (587)    | 15.25             | 3.58          |
| 2;FUT;SG;V         | 7.14 (14)         | 4.10 (586)    | 7.14              | 11.43         |
| 2;IMP;POS;SG;V     | 33.94 (436)       | 26.06 (587)   | 52.06             | 39.01         |
| 3;PL;PRS;V         | 43.47 (375)       | 31.01 (587)   | 75.20             | 62.01         |
| 2;PL;PRS;SBJV;V    | 20.00 (5)         | 0.52 (579)    | 20.00             | 0.86          |
| 2;PFV;PL;PST;V     | 0.00 (3)          | 0.34 (586)    | 0.00              | 2.9           |
| NFIN;V             | 45.64 (493)       | 40.03 (587)   | 93.51             | 84.16         |
| 2;COND;PL;V        | -                 | 0.00 (586)    | -                 | 0.34          |
| 3;IPFV;PL;PST;V    | 55.92 (245)       | 33.90 (587)   | 94.29             | 95.06         |
| 2;PFV;PST;SG;V     | 28.57 (7)         | 0.85 (586)    | 28.57             | 1.71          |
| 1;IMP;PL;POS;V     | 33.90 (59)        | 11.74 (579)   | 61.02             | 28.84         |
| 2;IMP;PL;POS;V     | 3.38 (148)        | 2.21 (587)    | 4.05              | 2.73          |
| 1;FUT;SG;V         | 41.86 (43)        | 21.16 (586)   | 72.09             | 69.28         |
| 2;IPFV;PST;SG;V    | 0.00 (4)          | 1.87 (587)    | 0.00              | 3.92          |
| 2;PRS;SG;V         | 21.62 (222)       | 15.04 (585)   | 34.68             | 23.42         |
| 2;PL;PRS;V         | 7.35 (68)         | 2.21 (587)    | 8.82              | 2.73          |
| 1;PFV;PL;PST;V     | 0.00 (10)         | 0.68 (586)    | 0.00              | 3.75          |
| 2;FUT;PL;V         | 0.00 (8)          | 0.00 (586)    | 0.00              | 0.51          |
| ADJ;MASC;SG        | 54.70 (532)       | 52.60 (557)   | 93.42             | 92.46         |
| ADJ;MASC;PL        | 54.98 (502)       | 52.34 (535)   | 94.62             | 94.39         |
| ADJ;FEM;SG         | 54.49 (523)       | 53.57 (532)   | 94.46             | 94.17         |
| ADJ;FEM;PL         | 56.70 (485)       | 55.15 (495)   | 95.67             | 95.15         |

Table 110: The performance of [Ruder et al. \(2018\)](#)’s model on translating words belonging to a specific morphological category for the Italian–Portuguese language pair (the grey numbers correspond to the dictionary sizes).

| Morph           | Italian–Spanish   |               |                   |               |
|-----------------|-------------------|---------------|-------------------|---------------|
|                 | Normal (In vocab) | Normal (+OOV) | Lexeme (In vocab) | Lexeme (+OOV) |
| ALL             | 42.69 (11685)     | 21.07 (30686) | 76.43             | 47.57         |
| N;SG            | 48.95 (2756)      | 45.70 (2965)  | 87.41             | 86.27         |
| N;PL            | 46.27 (2092)      | 41.11 (2588)  | 86.57             | 85.51         |
| ADJ;FEM;SG      | 56.54 (596)       | 55.79 (604)   | 93.29             | 93.21         |
| ADJ;MASC;SG     | 54.68 (609)       | 52.76 (633)   | 91.46             | 91.15         |
| ADJ;MASC;PL     | 56.26 (583)       | 54.13 (617)   | 94.51             | 94.17         |
| ADJ;FEM;PL      | 56.01 (566)       | 56.04 (571)   | 91.52             | 91.59         |
| 1;PFV;PL;PST;V  | 0.00 (14)         | 6.07 (643)    | 0.00              | 11.2          |
| 2;IPFV;PST;SG;V | 11.11 (9)         | 2.17 (644)    | 11.11             | 5.59          |
| 3;PFV;PST;SG;V  | 37.56 (426)       | 28.11 (644)   | 62.68             | 52.02         |
| 3;PL;PRS;V      | 47.96 (442)       | 36.49 (644)   | 75.11             | 63.2          |
| 1;FUT;PL;V      | 54.55 (33)        | 19.25 (644)   | 78.79             | 62.27         |
| 1;PL;PRS;V      | 36.03 (136)       | 19.31 (637)   | 77.21             | 49.92         |
| 2;PFV;PL;PST;V  | 0.00 (1)          | 0.00 (643)    | 0.00              | 0.78          |
| 3;IPFV;PST;SG;V | 55.07 (365)       | 39.38 (645)   | 86.30             | 82.02         |
| 2;PL;PRS;V      | 4.81 (104)        | 1.71 (644)    | 4.81              | 3.26          |
| 1;COND;PL;V     | 44.44 (9)         | 19.72 (644)   | 77.78             | 76.71         |
| 3;FUT;PL;V      | 52.78 (144)       | 23.91 (644)   | 96.53             | 94.25         |
| 1;IPFV;PL;PST;V | 62.50 (8)         | 15.22 (644)   | 100.00            | 63.82         |
| 3;PRS;SG;V      | 39.64 (550)       | 34.73 (645)   | 60.55             | 50.85         |
| 3;COND;SG;V     | 17.09 (117)       | 5.58 (645)    | 40.17             | 9.92          |
| 2;PL;PST;SBJV;V | -                 | 0.00 (644)    | -                 | 0.78          |
| 1;FUT;SG;V      | 45.16 (62)        | 20.19 (644)   | 69.35             | 43.17         |
| 1;PFV;PST;SG;V  | 3.39 (59)         | 0.93 (643)    | 5.08              | 1.71          |
| 3;PRS;SBJV;SG;V | 28.36 (409)       | 21.89 (644)   | 42.79             | 34.94         |
| 1;PRS;SBJV;SG;V | 28.19 (408)       | 21.77 (643)   | 42.65             | 34.84         |
| 3;PL;PRS;SBJV;V | 17.09 (199)       | 8.86 (643)    | 29.15             | 16.02         |
| 1;PRS;SG;V      | 30.08 (369)       | 20.96 (644)   | 46.07             | 31.83         |
| 3;IMP;POS;SG;V  | 28.36 (409)       | 22.08 (643)   | 42.79             | 34.99         |
| 1;PL;PRS;SBJV;V | 37.07 (116)       | 19.31 (637)   | 75.86             | 49.92         |
| 2;IMP;PL;POS;V  | 3.35 (179)        | 1.67 (659)    | 5.03              | 3.19          |
| 3;FUT;SG;V      | 51.44 (243)       | 31.01 (645)   | 92.18             | 91.16         |
| 2;FUT;PL;V      | 33.33 (6)         | 7.45 (644)    | 50.00             | 25            |
| 1;PL;PST;SBJV;V | 0.00 (7)          | 1.71 (644)    | 14.29             | 11.34         |
| 3;IMP;PL;POS;V  | 17.17 (198)       | 8.88 (642)    | 29.29             | 16.04         |
| 3;PL;PST;SBJV;V | 3.79 (132)        | 7.76 (644)    | 8.33              | 25.31         |
| 3;IPFV;PL;PST;V | 60.55 (289)       | 37.42 (644)   | 98.27             | 97.67         |
| 2;PST;SBJV;SG;V | 10.00 (10)        | 2.80 (644)    | 10.00             | 6.21          |
| 3;PFV;PL;PST;V  | 51.48 (338)       | 35.93 (643)   | 97.04             | 94.09         |
| NFIN;V          | 44.92 (581)       | 40.39 (661)   | 91.74             | 86.99         |
| 3;COND;PL;V     | 29.51 (61)        | 9.63 (644)    | 59.02             | 45.03         |
| 2;PFV;PST;SG;V  | 0.00 (1)          | 0.16 (643)    | 0.00              | 0.93          |
| 1;IMP;PL;POS;V  | 36.21 (116)       | 18.71 (652)   | 75.86             | 50.92         |
| 1;IPFV;PST;SG;V | 12.50 (40)        | 6.52 (644)    | 15.00             | 11.65         |
| 2;PRS;SG;V      | 25.68 (331)       | 19.00 (642)   | 39.88             | 30.69         |
| 1;PST;SBJV;SG;V | 3.85 (26)         | 2.80 (644)    | 3.85              | 6.21          |
| 2;PL;PRS;SBJV;V | 0.00 (14)         | 0.00 (637)    | 0.00              | 0.31          |
| 2;IMP;POS;SG;V  | 35.51 (490)       | 27.92 (659)   | 54.90             | 41.12         |
| 2;IPFV;PL;PST;V | 0.00 (1)          | 0.47 (644)    | 0.00              | 0.93          |
| 2;COND;SG;V     | 16.67 (6)         | 0.78 (644)    | 33.33             | 2.17          |
| 2;COND;PL;V     | 0.00 (1)          | 2.80 (644)    | 0.00              | 13.51         |
| 1;COND;SG;V     | 1.54 (65)         | 0.00 (644)    | 4.62              | 0.16          |
| 3;PST;SBJV;SG;V | 13.71 (197)       | 11.63 (645)   | 22.84             | 26.67         |
| 2;PRS;SBJV;SG;V | 30.47 (338)       | 21.77 (643)   | 45.56             | 34.84         |
| 2;FUT;SG;V      | 35.00 (20)        | 13.51 (644)   | 45.00             | 40.68         |

Table 111: The performance of [Ruder et al. \(2018\)](#)’s model on translating words belonging to a specific morphological category for the Italian–Spanish language pair (the grey numbers correspond to the dictionary sizes).



| Portuguese–Catalan |                   |               |                   |               |
|--------------------|-------------------|---------------|-------------------|---------------|
| Morph              | Normal (In vocab) | Normal (+OOV) | Lexeme (In vocab) | Lexeme (+OOV) |
| ALL                | 47.78 (7199)      | 27.60 (16059) | 77.64             | 49.85         |
| N;SG               | 53.50 (1527)      | 51.50 (1598)  | 87.62             | 87.05         |
| N;PL               | 54.08 (1274)      | 50.91 (1424)  | 90.82             | 90.24         |
| 3;FUT;PL;V         | 62.67 (75)        | 42.82 (348)   | 78.67             | 76.72         |
| 1;COND;PL;V        | 20.00 (5)         | 29.89 (348)   | 40.00             | 69.83         |
| NFIN;V             | 51.21 (330)       | 48.85 (348)   | 90.00             | 86.21         |
| 3;IPFV;PST;SG;V    | 55.73 (253)       | 45.69 (348)   | 85.38             | 80.75         |
| 1;FUT;PL;V         | 57.14 (21)        | 32.76 (348)   | 76.19             | 64.94         |
| 1;PFV;PL;PST;V     | 20.00 (5)         | 6.32 (348)    | 40.00             | 10.63         |
| 2;COND;SG;V        | 50.00 (2)         | 5.17 (348)    | 50.00             | 9.77          |
| 2;FUT;SG;V         | 0.00 (8)          | 6.90 (348)    | 0.00              | 16.09         |
| 1;IMP;PL;POS;V     | 10.71 (28)        | 13.54 (347)   | 39.29             | 25.65         |
| 2;PFV;PL;PST;V     | -                 | 0.00 (348)    | -                 | 0.86          |
| 1;PL;PRS;V         | 39.25 (107)       | 15.23 (348)   | 57.01             | 24.71         |
| 3;PRS;SG;V         | 44.20 (319)       | 42.94 (347)   | 60.19             | 57.93         |
| 3;IPFV;PL;PST;V    | 61.01 (218)       | 46.84 (348)   | 98.17             | 95.4          |
| 2;COND;PL;V        | -                 | 2.30 (348)    | -                 | 8.91          |
| 1;PL;PRS;SBJV;V    | 10.71 (28)        | 13.54 (347)   | 39.29             | 25.65         |
| 1;PRS;SG;V         | 24.71 (174)       | 14.45 (346)   | 36.78             | 21.97         |
| 3;IMP;PL;POS;V     | 21.60 (162)       | 13.54 (347)   | 33.95             | 26.8          |
| 2;PFV;PST;SG;V     | 0.00 (3)          | 0.00 (348)    | 0.00              | 0.29          |
| 3;PL;PRS;SBJV;V    | 21.60 (162)       | 13.54 (347)   | 33.95             | 26.8          |
| 2;PL;PRS;SBJV;V    | 33.33 (3)         | 2.59 (347)    | 33.33             | 4.9           |
| 3;PFV;PST;SG;V     | 37.91 (277)       | 33.33 (348)   | 53.79             | 47.99         |
| 2;PRS;SG;V         | 21.05 (95)        | 12.10 (347)   | 30.53             | 20.46         |
| 1;COND;SG;V        | 53.25 (169)       | 35.63 (348)   | 69.23             | 60.06         |
| 2;PL;PRS;V         | 28.57 (14)        | 1.72 (348)    | 35.71             | 2.3           |
| 1;IPFV;PST;SG;V    | 55.73 (253)       | 45.69 (348)   | 85.38             | 80.75         |
| 3;IMP;POS;SG;V     | 20.45 (220)       | 13.83 (347)   | 35.00             | 25.36         |
| 3;PFV;PL;PST;V     | 52.14 (234)       | 43.97 (348)   | 83.76             | 78.74         |
| 3;COND;PL;V        | 64.29 (98)        | 42.24 (348)   | 82.65             | 75.29         |
| 1;FUT;SG;V         | 51.61 (31)        | 27.87 (348)   | 67.74             | 44.83         |
| 3;PL;PRS;V         | 46.64 (283)       | 41.21 (347)   | 80.21             | 71.18         |
| 3;COND;SG;V        | 53.25 (169)       | 35.63 (348)   | 69.23             | 60.06         |
| 3;PRS;SBJV;SG;V    | 20.36 (221)       | 13.83 (347)   | 34.84             | 25.36         |
| 2;PRS;SBJV;SG;V    | 7.14 (42)         | 3.17 (347)    | 16.67             | 6.63          |
| 3;FUT;SG;V         | 65.44 (136)       | 47.70 (348)   | 88.97             | 82.76         |
| 2;IMP;PL;POS;V     | 2.44 (41)         | 0.29 (348)    | 7.32              | 2.59          |
| 2;IPFV;PL;PST;V    | 60.00 (5)         | 2.30 (348)    | 80.00             | 3.45          |
| 2;IMP;POS;SG;V     | 44.30 (316)       | 42.36 (347)   | 60.44             | 57.35         |
| 1;IPFV;PL;PST;V    | 22.22 (9)         | 14.94 (348)   | 55.56             | 63.22         |
| 1;PFV;PST;SG;V     | 1.25 (80)         | 0.57 (348)    | 2.50              | 2.3           |
| 2;FUT;PL;V         | 0.00 (1)          | 6.61 (348)    | 0.00              | 11.78         |
| 1;PRS;SBJV;SG;V    | 20.36 (221)       | 13.83 (347)   | 34.84             | 25.36         |
| 2;IPFV;PST;SG;V    | 0.00 (2)          | 3.45 (348)    | 0.00              | 6.61          |
| ADJ;MASC;PL        | 65.75 (365)       | 62.66 (399)   | 96.44             | 96.24         |
| ADJ;FEM;SG         | 25.19 (385)       | 24.94 (393)   | 70.91             | 70.74         |
| ADJ;MASC;SG        | 60.16 (384)       | 58.21 (402)   | 92.19             | 91.79         |
| ADJ;FEM;PL         | 63.87 (357)       | 62.74 (365)   | 97.20             | 96.71         |

Table 112: The performance of [Ruder et al. \(2018\)](#)’s model on translating words belonging to a specific morphological category for the Portuguese–Catalan language pair (the grey numbers correspond to the dictionary sizes).

| Morph           | Portuguese–French |               |                   |               |
|-----------------|-------------------|---------------|-------------------|---------------|
|                 | Normal (In vocab) | Normal (+OOV) | Lexeme (In vocab) | Lexeme (+OOV) |
| ALL             | 47.11 (9664)      | 25.58 (22437) | 77.40             | 47.22         |
| N;SG            | 54.13 (2095)      | 52.10 (2188)  | 87.64             | 86.93         |
| N;PL            | 53.93 (1641)      | 49.85 (1960)  | 93.30             | 92.09         |
| 1;COND;PL;V     | 0.00 (10)         | 9.55 (492)    | 40.00             | 39.02         |
| 1;PRS;SBJV;SG;V | 20.74 (323)       | 16.29 (491)   | 32.20             | 25.66         |
| 2;COND;PL;V     | -                 | 0.00 (492)    | -                 | 1.63          |
| 1;COND;SG;V     | 32.08 (159)       | 18.70 (492)   | 49.69             | 36.99         |
| 1;IPFV;PL;PST;V | 0.00 (10)         | 1.42 (492)    | 10.00             | 6.5           |
| 2;PL;PRS;V      | 16.67 (24)        | 1.02 (492)    | 25.00             | 2.24          |
| 1;PRS;SG;V      | 23.48 (264)       | 16.09 (491)   | 36.74             | 24.64         |
| 1;IMP;PL;POS;V  | 15.00 (40)        | 6.92 (491)    | 42.50             | 20.98         |
| 1;FUT;SG;V      | 41.18 (51)        | 34.55 (492)   | 74.51             | 70.12         |
| 2;IMP;PL;POS;V  | 2.99 (67)         | 0.61 (492)    | 4.48              | 2.44          |
| 2;PFV;PST;SG;V  | 0.00 (19)         | 1.02 (491)    | 5.26              | 1.83          |
| 1;PL;PRS;SBJV;V | 15.15 (33)        | 6.92 (491)    | 45.45             | 20.98         |
| 3;PRS;SBJV;SG;V | 20.74 (323)       | 16.23 (493)   | 32.20             | 25.76         |
| 1;PFV;PST;SG;V  | 3.01 (133)        | 1.63 (491)    | 3.01              | 4.48          |
| 2;FUT;SG;V      | 25.00 (8)         | 5.28 (492)    | 25.00             | 11.18         |
| 2;IMP;POS;SG;V  | 43.14 (452)       | 39.51 (491)   | 59.51             | 53.56         |
| 2;PFV;PL;PST;V  | 0.00 (3)          | 1.83 (491)    | 0.00              | 6.31          |
| 3;COND;SG;V     | 29.21 (202)       | 18.62 (494)   | 44.55             | 36.84         |
| 2;FUT;PL;V      | 0.00 (1)          | 2.85 (492)    | 100.00            | 7.72          |
| 2;PRS;SBJV;SG;V | 21.90 (105)       | 13.24 (491)   | 52.38             | 25.87         |
| 3;PL;PRS;SBJV;V | 33.33 (198)       | 23.22 (491)   | 62.12             | 49.9          |
| 2;IPFV;PL;PST;V | 19.51 (41)        | 2.24 (492)    | 31.71             | 3.86          |
| 1;IPFV;PST;SG;V | 53.62 (235)       | 46.34 (492)   | 87.23             | 81.91         |
| 3;FUT;SG;V      | 45.62 (160)       | 28.95 (494)   | 66.88             | 51.21         |
| 3;PRS;SG;V      | 42.92 (452)       | 39.15 (493)   | 59.96             | 53.75         |
| 2;IPFV;PST;SG;V | 0.00 (7)          | 0.00 (492)    | 42.86             | 0.81          |
| 1;FUT;PL;V      | 42.31 (26)        | 27.03 (492)   | 65.38             | 62.2          |
| 3;FUT;PL;V      | 57.32 (82)        | 33.74 (492)   | 86.59             | 74.19         |
| 2;PRS;SG;V      | 24.60 (126)       | 15.07 (491)   | 53.97             | 29.53         |
| 3;COND;PL;V     | 33.62 (116)       | 20.73 (492)   | 51.72             | 44.51         |
| 3;IPFV;PST;SG;V | 52.85 (333)       | 46.15 (494)   | 86.19             | 81.98         |
| 2;PL;PRS;SBJV;V | -                 | 0.81 (491)    | -                 | 2.04          |
| 1;PL;PRS;V      | 29.01 (131)       | 10.16 (492)   | 45.04             | 21.34         |
| 1;PFV;PL;PST;V  | 16.67 (18)        | 8.15 (491)    | 27.78             | 14.46         |
| 3;PFV;PL;PST;V  | 46.91 (324)       | 38.09 (491)   | 80.25             | 82.48         |
| NFIN;V          | 57.02 (463)       | 53.04 (494)   | 90.71             | 86.64         |
| 3;PFV;PST;SG;V  | 32.84 (405)       | 28.19 (493)   | 52.59             | 45.64         |
| 2;COND;SG;V     | 0.00 (5)          | 0.00 (492)    | 20.00             | 0.81          |
| 3;PL;PRS;V      | 55.76 (373)       | 46.64 (491)   | 90.88             | 81.87         |
| 3;IPFV;PL;PST;V | 58.76 (274)       | 47.56 (492)   | 91.97             | 93.5          |
| ADJ;FEM;SG      | 60.60 (500)       | 60.44 (503)   | 93.80             | 93.64         |
| ADJ;MASC;PL     | 60.12 (489)       | 57.66 (522)   | 96.52             | 95.79         |
| ADJ;FEM;PL      | 62.69 (469)       | 61.80 (479)   | 97.65             | 97.29         |
| ADJ;MASC;SG     | 60.47 (511)       | 59.47 (528)   | 91.59             | 91.29         |

Table 113: The performance of [Ruder et al. \(2018\)](#)’s model on translating words belonging to a specific morphological category for the Portuguese–French language pair (the grey numbers correspond to the dictionary sizes).

| Morph           | Portuguese–Italian |               |                   |               |
|-----------------|--------------------|---------------|-------------------|---------------|
|                 | Normal (In vocab)  | Normal (+OOV) | Lexeme (In vocab) | Lexeme (+OOV) |
| ALL             | 46.38 (8939)       | 24.82 (20757) | 77.76             | 48.98         |
| N;SG            | 56.74 (2069)       | 54.65 (2159)  | 90.72             | 90.37         |
| N;PL            | 50.00 (1598)       | 45.97 (1888)  | 88.17             | 85.81         |
| 3;IPFV;PL;PST;V | 58.17 (251)        | 45.58 (452)   | 96.02             | 96.68         |
| 1;FUT;PL;V      | 19.05 (21)         | 18.14 (452)   | 61.90             | 59.73         |
| 1;IPFV;PL;PST;V | 37.50 (8)          | 19.47 (452)   | 87.50             | 81.19         |
| 2;FUT;SG;V      | 0.00 (6)           | 2.43 (452)    | 16.67             | 11.73         |
| 2;COND;PL;V     | -                  | 0.00 (452)    | -                 | 2.43          |
| 2;IPFV;PL;PST;V | 50.00 (4)          | 2.21 (452)    | 75.00             | 4.2           |
| 3;PL;PRS;V      | 50.29 (346)        | 44.35 (451)   | 85.55             | 76.27         |
| 2;IMP;PL;POS;V  | 0.00 (58)          | 0.44 (452)    | 1.72              | 1.99          |
| 3;IMP;PL;POS;V  | 13.07 (176)        | 7.32 (451)    | 25.57             | 15.52         |
| 3;PL;PRS;SBJV;V | 13.07 (176)        | 7.32 (451)    | 25.57             | 15.52         |
| 2;PFV;PL;PST;V  | 0.00 (5)           | 5.97 (452)    | 20.00             | 11.5          |
| 1;COND;PL;V     | 57.14 (7)          | 18.58 (452)   | 85.71             | 69.25         |
| 3;FUT;SG;V      | 41.91 (136)        | 26.99 (452)   | 65.44             | 55.75         |
| 2;IMP;POS;SG;V  | 46.57 (408)        | 44.35 (451)   | 66.42             | 62.75         |
| 3;PRS;SBJV;SG;V | 17.35 (294)        | 12.86 (451)   | 27.55             | 18.63         |
| 3;PFV;PST;SG;V  | 40.69 (376)        | 36.95 (452)   | 72.61             | 70.13         |
| 1;IMP;PL;POS;V  | 23.08 (26)         | 16.85 (451)   | 53.85             | 51.66         |
| 2;PFV;PST;SG;V  | 0.00 (7)           | 0.88 (452)    | 0.00              | 1.77          |
| 1;PL;PRS;SBJV;V | 23.08 (26)         | 16.85 (451)   | 53.85             | 51.66         |
| 1;PFV;PL;PST;V  | 11.11 (18)         | 2.21 (452)    | 27.78             | 5.97          |
| 3;COND;PL;V     | 2.35 (85)          | 0.88 (452)    | 2.35              | 4.65          |
| 2;COND;SG;V     | 16.67 (6)          | 0.44 (452)    | 33.33             | 1.11          |
| 3;IMP;POS;SG;V  | 17.35 (294)        | 12.86 (451)   | 27.55             | 18.63         |
| NFIN;V          | 55.14 (428)        | 53.32 (452)   | 97.66             | 96.24         |
| 1;FUT;SG;V      | 25.00 (44)         | 20.13 (452)   | 59.09             | 55.75         |
| 1;COND;SG;V     | 4.69 (128)         | 2.88 (452)    | 10.16             | 11.95         |
| 1;IPFV;PST;SG;V | 51.01 (149)        | 44.47 (452)   | 86.58             | 82.74         |
| 2;FUT;PL;V      | 0.00 (1)           | 0.66 (452)    | 0.00              | 6.19          |
| 3;PRS;SG;V      | 46.52 (417)        | 44.35 (451)   | 66.67             | 62.75         |
| 2;PRS;SBJV;SG;V | 13.19 (91)         | 6.87 (451)    | 37.36             | 15.74         |
| 2;PL;PRS;SBJV;V | 0.00 (1)           | 0.67 (451)    | 0.00              | 2.66          |
| 1;PRS;SBJV;SG;V | 17.35 (294)        | 12.86 (451)   | 27.55             | 18.63         |
| 2;PRS;SG;V      | 20.00 (130)        | 6.87 (451)    | 33.85             | 11.53         |
| 3;IPFV;PST;SG;V | 51.94 (310)        | 44.47 (452)   | 86.77             | 82.74         |
| 2;IPFV;PST;SG;V | 40.00 (5)          | 1.77 (452)    | 40.00             | 1.77          |
| 3;FUT;PL;V      | 46.88 (64)         | 23.67 (452)   | 79.69             | 71.46         |
| 3;PFV;PL;PST;V  | 54.97 (302)        | 46.90 (452)   | 94.70             | 94.03         |
| 3;COND;SG;V     | 4.43 (158)         | 2.88 (452)    | 10.76             | 11.95         |
| 2;PL;PRS;V      | 23.53 (34)         | 4.20 (452)    | 47.06             | 15.04         |
| 1;PFV;PST;SG;V  | 0.81 (124)         | 0.88 (452)    | 0.81              | 1.55          |
| 1;PRS;SG;V      | 28.40 (243)        | 22.17 (451)   | 46.09             | 34.59         |
| 1;PL;PRS;V      | 25.93 (108)        | 16.59 (452)   | 59.26             | 43.36         |
| ADJ;MASC;PL     | 62.18 (431)        | 59.05 (464)   | 96.98             | 96.12         |
| ADJ;FEM;PL      | 61.08 (424)        | 60.89 (427)   | 94.81             | 94.85         |
| ADJ;MASC;SG     | 61.38 (448)        | 59.53 (467)   | 93.53             | 92.51         |
| ADJ;FEM;SG      | 64.04 (445)        | 64.04 (445)   | 93.26             | 93.03         |

Table 114: The performance of [Ruder et al. \(2018\)](#)’s model on translating words belonging to a specific morphological category for the Portuguese–Italian language pair (the grey numbers correspond to the dictionary sizes).

| Portuguese–Spanish |                   |               |                   |               |
|--------------------|-------------------|---------------|-------------------|---------------|
| Morph              | Normal (In vocab) | Normal (+OOV) | Lexeme (In vocab) | Lexeme (+OOV) |
| ALL                | 60.15 (9275)      | 36.80 (22638) | 84.72             | 57.08         |
| N;SG               | 64.38 (1940)      | 62.28 (2015)  | 90.31             | 89.63         |
| N;PL               | 64.40 (1576)      | 60.74 (1816)  | 92.32             | 91.52         |
| ADJ;FEM;SG         | 64.76 (542)       | 64.40 (545)   | 94.10             | 94.13         |
| ADJ;MASC;SG        | 66.11 (543)       | 64.12 (563)   | 93.74             | 93.43         |
| ADJ;MASC;PL        | 69.20 (526)       | 66.01 (559)   | 96.77             | 96.78         |
| ADJ;FEM;PL         | 68.87 (514)       | 68.07 (523)   | 97.47             | 97.32         |
| 2;FUT;PL;V         | 0.00 (4)          | 9.76 (451)    | 25.00             | 25.28         |
| 3;PL;PRS;V         | 60.82 (342)       | 50.44 (450)   | 83.63             | 72.67         |
| 2;PFV;PL;PST;V     | 0.00 (2)          | 0.00 (451)    | 0.00              | 0.44          |
| 3;IPFV;PL;PST;V    | 70.70 (256)       | 55.65 (451)   | 99.22             | 97.78         |
| 3;PFV;PST;SG;V     | 56.67 (360)       | 48.56 (451)   | 78.61             | 73.17         |
| 3;FUT;PL;SBJV;V    | 0.00 (30)         | 0.22 (451)    | 0.00              | 0.22          |
| 2;IMP;POS;SG;V     | 53.68 (408)       | 49.78 (450)   | 68.14             | 61.78         |
| 3;FUT;PL;V         | 77.03 (74)        | 54.99 (451)   | 95.95             | 88.69         |
| 1;COND;SG;V        | 60.61 (198)       | 46.12 (451)   | 79.29             | 67.85         |
| 3;IMP;POS;SG;V     | 47.06 (289)       | 35.71 (448)   | 57.44             | 44.42         |
| 2;IMP;PL;POS;V     | 4.26 (47)         | 6.43 (451)    | 12.77             | 11.53         |
| 2;FUT;PL;SBJV;V    | -                 | 0.00 (451)    | -                 | 0.44          |
| 1;IMP;PL;POS;V     | 47.06 (34)        | 27.01 (448)   | 58.82             | 39.96         |
| 2;FUT;SG;V         | 45.45 (11)        | 25.94 (451)   | 63.64             | 42.79         |
| 3;PFV;PL;PST;V     | 67.11 (298)       | 56.10 (451)   | 94.97             | 92.46         |
| 2;PL;PRS;V         | 13.33 (15)        | 1.77 (451)    | 26.67             | 2             |
| 2;COND;SG;V        | 0.00 (5)          | 26.61 (451)   | 60.00             | 44.57         |
| 2;COND;PL;V        | 0.00 (1)          | 1.77 (451)    | 0.00              | 4.88          |
| 2;PRS;SG;V         | 48.36 (122)       | 38.44 (450)   | 59.02             | 49.33         |
| 3;COND;PL;V        | 73.74 (99)        | 51.88 (451)   | 95.96             | 91.35         |
| 2;PRS;SBJV;SG;V    | 45.74 (94)        | 28.95 (449)   | 64.89             | 40.53         |
| 3;IPFV;PST;SG;V    | 68.77 (301)       | 56.54 (451)   | 89.70             | 84.26         |
| 2;FUT;SBJV;SG;V    | 14.29 (7)         | 25.94 (451)   | 28.57             | 32.15         |
| 1;FUT;PL;SBJV;V    | -                 | 0.00 (451)    | -                 | 0.22          |
| 2;IPFV;PST;SG;V    | 14.29 (7)         | 8.43 (451)    | 42.86             | 11.97         |
| 2;PFV;PST;SG;V     | 47.62 (21)        | 27.94 (451)   | 52.38             | 37.03         |
| 1;FUT;SG;V         | 64.58 (48)        | 41.91 (451)   | 87.50             | 64.75         |
| 1;PFV;PST;SG;V     | 19.63 (163)       | 9.98 (451)    | 33.74             | 17.74         |
| 2;PL;PRS;SBJV;V    | 25.00 (4)         | 0.89 (449)    | 50.00             | 2.45          |
| 1;IPFV;PST;SG;V    | 68.77 (301)       | 56.54 (451)   | 89.70             | 84.26         |
| 1;PL;PRS;V         | 68.10 (116)       | 45.01 (451)   | 81.90             | 59.87         |
| 1;FUT;PL;V         | 58.62 (29)        | 48.56 (451)   | 86.21             | 82.93         |
| 3;PRS;SG;V         | 53.90 (410)       | 50.00 (450)   | 68.54             | 62            |
| NFIN;V             | 57.08 (424)       | 54.77 (451)   | 91.98             | 88.03         |
| 3;IMP;PL;POS;V     | 42.71 (192)       | 24.72 (449)   | 59.38             | 39.42         |
| 3;PL;PRS;SBJV;V    | 42.71 (192)       | 24.72 (449)   | 59.38             | 39.42         |
| 1;PRS;SBJV;SG;V    | 47.24 (290)       | 35.86 (449)   | 57.59             | 44.54         |
| 1;IPFV;PL;PST;V    | 30.77 (13)        | 27.05 (451)   | 100.00            | 89.58         |
| 3;FUT;SBJV;SG;V    | 65.71 (140)       | 53.88 (451)   | 91.43             | 86.25         |
| 3;COND;SG;V        | 60.61 (198)       | 46.12 (451)   | 79.29             | 67.85         |
| 1;FUT;SBJV;SG;V    | 65.71 (140)       | 53.88 (451)   | 91.43             | 86.25         |
| 3;FUT;SG;V         | 79.05 (148)       | 57.87 (451)   | 95.27             | 89.58         |
| 1;PL;PRS;SBJV;V    | 47.06 (34)        | 26.73 (449)   | 58.82             | 39.64         |
| 1;PRS;SG;V         | 40.93 (237)       | 31.99 (447)   | 51.48             | 41.39         |
| 2;IPFV;PL;PST;V    | 0.00 (2)          | 1.55 (451)    | 50.00             | 2.22          |
| 3;PRS;SBJV;SG;V    | 47.24 (290)       | 35.86 (449)   | 57.59             | 44.54         |
| 1;COND;PL;V        | 87.50 (8)         | 47.89 (451)   | 100.00            | 91.13         |
| 1;PFV;PL;PST;V     | 52.17 (46)        | 20.84 (451)   | 67.39             | 28.82         |

Table 115: The performance of [Ruder et al. \(2018\)](#)’s model on translating words belonging to a specific morphological category for the Portuguese–Spanish language pair (the grey numbers correspond to the dictionary sizes).

| Morph           | Spanish–Catalan   |               |                   |               |
|-----------------|-------------------|---------------|-------------------|---------------|
|                 | Normal (In vocab) | Normal (+OOV) | Lexeme (In vocab) | Lexeme (+OOV) |
| ALL             | 49.40 (8291)      | 29.83 (18442) | 76.82             | 51.19         |
| N;SG            | 60.16 (1639)      | 59.42 (1666)  | 90.24             | 89.5          |
| N;PL            | 59.15 (1388)      | 56.61 (1542)  | 91.71             | 91.18         |
| ADJ;FEM;SG      | 30.55 (383)       | 30.23 (387)   | 77.55             | 77.78         |
| ADJ;MASC;SG     | 68.41 (383)       | 67.61 (389)   | 95.56             | 95.63         |
| ADJ;FEM;PL      | 72.10 (362)       | 71.31 (366)   | 94.20             | 94.26         |
| ADJ;MASC;PL     | 69.81 (371)       | 67.70 (387)   | 96.23             | 96.38         |
| 1;FUT;PL;V      | 38.46 (39)        | 45.80 (369)   | 64.10             | 90.79         |
| 2;PFV;PST;SG;V  | 0.00 (2)          | 0.00 (369)    | 0.00              | 0             |
| 2;IMP;PL;POS;V  | 2.70 (37)         | 0.54 (369)    | 5.41              | 2.44          |
| 2;PRS;SG;V      | 33.57 (143)       | 22.22 (369)   | 39.86             | 27.64         |
| 2;PST;SBJV;SG;V | 66.67 (3)         | 0.81 (369)    | 66.67             | 1.36          |
| 3;PFV;PL;PST;V  | 52.87 (244)       | 48.51 (369)   | 85.25             | 89.7          |
| 2;PFV;PL;PST;V  | -                 | 0.00 (369)    | -                 | 0             |
| 1;PL;PRS;SBJV;V | 28.36 (67)        | 15.72 (369)   | 53.73             | 23.85         |
| 2;COND;PL;V     | 0.00 (3)          | 6.78 (369)    | 0.00              | 14.36         |
| 3;IMP;POS;SG;V  | 20.70 (256)       | 18.16 (369)   | 35.94             | 28.18         |
| 1;PRS;SG;V      | 29.25 (212)       | 22.34 (367)   | 41.04             | 32.43         |
| 1;PL;PRS;V      | 31.58 (133)       | 12.74 (369)   | 43.61             | 17.89         |
| 3;PL;PRS;V      | 45.62 (320)       | 42.82 (369)   | 74.69             | 68.83         |
| 3;IPFV;PST;SG;V | 54.98 (291)       | 49.32 (369)   | 87.97             | 85.91         |
| 1;IPFV;PST;SG;V | 54.98 (291)       | 49.32 (369)   | 87.97             | 85.91         |
| 3;PL;PRS;SBJV;V | 21.18 (203)       | 15.99 (369)   | 36.45             | 31.71         |
| 3;PRS;SG;V      | 52.30 (348)       | 51.22 (369)   | 67.24             | 63.41         |
| 2;IPFV;PST;SG;V | 0.00 (7)          | 3.25 (369)    | 0.00              | 4.88          |
| 3;FUT;SG;V      | 60.43 (187)       | 50.95 (369)   | 85.56             | 93.77         |
| 3;COND;PL;V     | 53.79 (132)       | 49.59 (369)   | 73.48             | 90.51         |
| 3;COND;SG;V     | 50.75 (201)       | 38.21 (369)   | 68.66             | 62.06         |
| 2;PL;PST;SBJV;V | -                 | 0.00 (369)    | -                 | 3.25          |
| 2;FUT;PL;V      | 0.00 (6)          | 3.52 (369)    | 0.00              | 4.88          |
| 3;PST;SBJV;SG;V | 42.77 (166)       | 29.54 (369)   | 57.23             | 46.34         |
| 1;PL;PST;SBJV;V | 33.33 (3)         | 0.81 (369)    | 33.33             | 4.34          |
| 3;FUT;PL;V      | 45.32 (139)       | 44.72 (369)   | 70.50             | 84.28         |
| 3;IMP;PL;POS;V  | 21.18 (203)       | 15.99 (369)   | 36.45             | 31.71         |
| 2;COND;SG;V     | 0.00 (3)          | 1.90 (369)    | 0.00              | 2.71          |
| 1;PRS;SBJV;SG;V | 20.70 (256)       | 18.16 (369)   | 35.94             | 28.18         |
| 1;PFV;PL;PST;V  | 50.00 (6)         | 10.57 (369)   | 66.67             | 15.18         |
| 2;IPFV;PL;PST;V | 0.00 (2)          | 0.54 (369)    | 0.00              | 0.81          |
| 1;IMP;PL;POS;V  | 28.36 (67)        | 15.72 (369)   | 53.73             | 23.85         |
| 2;PL;PRS;SBJV;V | 25.00 (16)        | 4.34 (369)    | 56.25             | 10.57         |
| 2;PL;PRS;V      | 10.00 (20)        | 2.17 (369)    | 20.00             | 5.96          |
| 1;PFV;PST;SG;V  | 0.00 (71)         | 1.36 (369)    | 2.82              | 1.63          |
| 1;FUT;SG;V      | 35.00 (40)        | 43.36 (369)   | 45.00             | 65.58         |
| 1;COND;PL;V     | 42.86 (7)         | 39.57 (369)   | 57.14             | 86.99         |
| 3;IPFV;PL;PST;V | 55.69 (255)       | 49.86 (369)   | 95.29             | 96.48         |
| 1;IPFV;PL;PST;V | 25.00 (4)         | 17.62 (369)   | 75.00             | 65.85         |
| 3;PRS;SBJV;SG;V | 20.70 (256)       | 18.16 (369)   | 35.94             | 28.18         |
| 3;PL;PST;SBJV;V | 64.71 (119)       | 39.30 (369)   | 90.76             | 86.18         |
| 1;PST;SBJV;SG;V | 42.77 (166)       | 29.54 (369)   | 57.23             | 46.34         |
| 2;FUT;SG;V      | 25.00 (12)        | 15.45 (369)   | 33.33             | 27.1          |
| 1;COND;SG;V     | 50.75 (201)       | 38.21 (369)   | 68.66             | 62.06         |
| 3;PFV;PST;SG;V  | 37.76 (294)       | 34.15 (369)   | 56.12             | 51.22         |
| 2;IMP;POS;SG;V  | 52.17 (345)       | 50.68 (369)   | 66.96             | 62.6          |
| 2;PRS;SBJV;SG;V | 19.77 (86)        | 8.67 (369)    | 20.93             | 11.92         |
| NFIN;V          | 54.19 (358)       | 53.12 (369)   | 91.90             | 88.35         |

Table 116: The performance of [Ruder et al. \(2018\)](#)’s model on translating words belonging to a specific morphological category for the Spanish–Catalan language pair (the grey numbers correspond to the dictionary sizes).

| Morph           | Normal (In vocab) | Spanish–French |                   |               |
|-----------------|-------------------|----------------|-------------------|---------------|
|                 |                   | Normal (+OOV)  | Lexeme (In vocab) | Lexeme (+OOV) |
| ALL             | 45.46 (11457)     | 24.17 (25775)  | 74.10             | 44.19         |
| N;PL            | 58.96 (1886)      | 55.13 (2162)   | 94.06             | 92.6          |
| N;SG            | 57.71 (2301)      | 56.68 (2352)   | 89.57             | 89.33         |
| 3;PRS;SBJV;SG;V | 20.16 (382)       | 15.98 (513)    | 36.39             | 29.04         |
| 2;IMP;PL;POS;V  | 2.27 (44)         | 0.97 (513)     | 6.82              | 4.09          |
| 2;PRS;SBJV;SG;V | 26.92 (182)       | 16.18 (513)    | 45.05             | 25.34         |
| 1;FUT;PL;V      | 28.30 (53)        | 25.93 (513)    | 50.94             | 61.79         |
| 1;PFV;PST;SG;V  | 0.91 (110)        | 1.56 (513)     | 0.91              | 1.95          |
| 2;IPFV;PL;PST;V | 0.00 (1)          | 0.39 (513)     | 100.00            | 1.75          |
| 1;PFV;PL;PST;V  | 18.33 (60)        | 12.67 (513)    | 43.33             | 25.54         |
| 1;PL;PRS;SBJV;V | 14.71 (68)        | 7.21 (513)     | 32.35             | 22.22         |
| 2;IPFV;PST;SG;V | 20.00 (15)        | 4.87 (513)     | 26.67             | 9.16          |
| 3;PL;PRS;SBJV;V | 32.99 (291)       | 19.88 (513)    | 56.01             | 38.79         |
| 2;PL;PRS;SBJV;V | 0.00 (12)         | 1.17 (513)     | 0.00              | 2.34          |
| 3;PRS;SG;V      | 39.67 (484)       | 37.62 (513)    | 58.68             | 54.19         |
| 3;PFV;PST;SG;V  | 30.46 (417)       | 25.93 (513)    | 47.48             | 39.38         |
| 2;PL;PST;SBJV;V | -                 | 0.00 (513)     | -                 | 2.14          |
| 2;PL;PRS;V      | 0.00 (27)         | 4.48 (513)     | 3.70              | 8.38          |
| 2;PFV;PL;PST;V  | -                 | 0.97 (513)     | -                 | 1.56          |
| 2;COND;SG;V     | 11.11 (9)         | 1.95 (513)     | 22.22             | 5.07          |
| 2;COND;PL;V     | -                 | 6.04 (513)     | -                 | 23.2          |
| 3;PST;SBJV;SG;V | 5.84 (154)        | 11.31 (513)    | 14.29             | 28.07         |
| 1;PRS;SBJV;SG;V | 20.16 (382)       | 15.98 (513)    | 36.39             | 29.04         |
| 2;FUT;PL;V      | 20.00 (5)         | 5.46 (513)     | 20.00             | 11.7          |
| 1;PRS;SG;V      | 20.00 (360)       | 16.44 (511)    | 34.72             | 27.4          |
| 1;IPFV;PL;PST;V | 0.00 (15)         | 0.58 (513)     | 0.00              | 2.92          |
| 2;IMP;POS;SG;V  | 39.50 (476)       | 36.84 (513)    | 58.61             | 53.22         |
| 3;COND;SG;V     | 19.28 (249)       | 15.40 (513)    | 36.14             | 39.57         |
| 2;FUT;SG;V      | 0.00 (24)         | 0.00 (513)     | 0.00              | 1.17          |
| 3;FUT;SG;V      | 41.80 (244)       | 30.02 (513)    | 67.62             | 62.57         |
| 1;IPFV;PST;SG;V | 53.38 (266)       | 43.47 (513)    | 85.71             | 79.53         |
| 3;FUT;PL;V      | 49.11 (169)       | 35.67 (513)    | 81.07             | 85.96         |
| 2;PFV;PST;SG;V  | 0.00 (49)         | 0.00 (513)     | 0.00              | 0.39          |
| 3;IPFV;PST;SG;V | 52.20 (387)       | 43.47 (513)    | 85.79             | 79.53         |
| 2;PST;SBJV;SG;V | 0.00 (3)          | 0.00 (513)     | 0.00              | 3.7           |
| 3;PL;PRS;V      | 46.87 (431)       | 40.74 (513)    | 82.60             | 73.1          |
| 1;COND;SG;V     | 21.03 (195)       | 15.40 (513)    | 40.00             | 39.57         |
| 1;PL;PRS;V      | 24.55 (167)       | 14.04 (513)    | 42.51             | 28.27         |
| 1;PL;PST;SBJV;V | 0.00 (1)          | 0.00 (513)     | 0.00              | 0             |
| 3;COND;PL;V     | 18.34 (169)       | 15.79 (513)    | 40.83             | 42.3          |
| 3;PFV;PL;PST;V  | 40.11 (354)       | 35.48 (513)    | 84.18             | 86.55         |
| 1;IMP;PL;POS;V  | 12.20 (82)        | 7.21 (513)     | 35.37             | 22.22         |
| NFIN;V          | 52.00 (475)       | 48.73 (513)    | 93.05             | 88.69         |
| 1;PST;SBJV;SG;V | 6.52 (92)         | 11.31 (513)    | 10.87             | 28.07         |
| 2;PRS;SG;V      | 27.78 (198)       | 17.93 (513)    | 45.45             | 31.38         |
| 1;COND;PL;V     | 12.50 (8)         | 2.53 (513)     | 12.50             | 9.75          |
| 3;PL;PST;SBJV;V | 0.00 (86)         | 0.00 (513)     | 0.00              | 0.19          |
| 3;IPFV;PL;PST;V | 54.05 (333)       | 45.42 (513)    | 92.49             | 95.32         |
| 1;FUT;SG;V      | 47.22 (72)        | 28.65 (513)    | 79.17             | 64.52         |
| ADJ;FEM;PL      | 67.98 (506)       | 67.32 (511)    | 97.43             | 96.87         |
| ADJ;MASC;PL     | 68.35 (515)       | 66.29 (537)    | 96.31             | 95.9          |
| ADJ;FEM;SG      | 62.38 (529)       | 62.03 (532)    | 94.52             | 94.55         |
| ADJ;MASC;SG     | 64.97 (531)       | 63.96 (541)    | 93.60             | 93.35         |

Table 117: The performance of [Ruder et al. \(2018\)](#)’s model on translating words belonging to a specific morphological category for the Spanish–French language pair (the grey numbers correspond to the dictionary sizes).



| Morph           | Spanish–Italian   |               |                   |               |
|-----------------|-------------------|---------------|-------------------|---------------|
|                 | Normal (In vocab) | Normal (+OOV) | Lexeme (In vocab) | Lexeme (+OOV) |
| ALL             | 46.62 (10709)     | 27.08 (23528) | 76.19             | 50.67         |
| N;SG            | 58.65 (2319)      | 57.51 (2365)  | 92.19             | 91.67         |
| N;PL            | 49.42 (1805)      | 45.93 (2103)  | 85.82             | 83.59         |
| ADJ;MASC;SG     | 67.44 (476)       | 67.22 (482)   | 93.28             | 93.78         |
| ADJ;FEM;PL      | 69.21 (445)       | 68.82 (449)   | 95.51             | 95.32         |
| ADJ;MASC;PL     | 66.38 (461)       | 65.83 (477)   | 95.66             | 95.81         |
| ADJ;FEM;SG      | 70.00 (470)       | 70.00 (470)   | 95.32             | 95.32         |
| 2;IMP;PL;POS;V  | 1.59 (63)         | 1.06 (470)    | 12.7              | 5.32          |
| 1;PST;SBJV;SG;V | 56.67 (90)        | 37.86 (457)   | 78.89             | 68.71         |
| 1;FUT;PL;V      | 28.57 (49)        | 20.57 (457)   | 57.14             | 60.83         |
| 2;PFV;PST;SG;V  | 0.00 (19)         | 0.88 (457)    | 0                 | 1.31          |
| NFIN;V          | 56.46 (441)       | 54.24 (472)   | 96.15             | 93.43         |
| 3;PRS;SBJV;SG;V | 16.05 (324)       | 13.54 (458)   | 23.15             | 19.43         |
| 1;PL;PRS;SBJV;V | 30.00 (80)        | 22.10 (457)   | 80                | 65.21         |
| 2;FUT;SG;V      | 16.13 (31)        | 6.56 (457)    | 22.58             | 20.57         |
| 3;PFV;PST;SG;V  | 44.41 (367)       | 39.96 (458)   | 73.57             | 67.9          |
| 2;PL;PST;SBJV;V | 0.00 (1)          | 0.22 (457)    | 0                 | 0.88          |
| 3;IPFV;PST;SG;V | 54.90 (337)       | 48.25 (458)   | 90.5              | 85.37         |
| 2;IPFV;PL;PST;V | 0.00 (1)          | 0.66 (457)    | 0                 | 2.19          |
| 1;FUT;SG;V      | 26.87 (67)        | 20.57 (457)   | 59.7              | 49.45         |
| 3;COND;PL;V     | 3.39 (118)        | 3.06 (457)    | 7.63              | 8.32          |
| 1;IPFV;PL;PST;V | 33.33 (15)        | 27.35 (457)   | 93.33             | 93.22         |
| 3;PL;PRS;V      | 48.91 (368)       | 43.98 (457)   | 78.53             | 70.24         |
| 3;PST;SBJV;SG;V | 50.28 (177)       | 37.77 (458)   | 75.14             | 68.78         |
| 2;FUT;PL;V      | 16.67 (6)         | 4.16 (457)    | 16.67             | 14.22         |
| 1;COND;SG;V     | 3.18 (157)        | 4.16 (457)    | 8.28              | 10.94         |
| 2;PL;PRS;V      | 11.11 (27)        | 1.09 (457)    | 14.81             | 3.28          |
| 2;PST;SBJV;SG;V | 0.00 (4)          | 3.28 (457)    | 0                 | 5.69          |
| 1;COND;PL;V     | 33.33 (12)        | 21.44 (457)   | 75                | 70.24         |
| 3;PFV;PL;PST;V  | 56.87 (313)       | 50.77 (457)   | 94.25             | 95.84         |
| 1;PRS;SBJV;SG;V | 16.05 (324)       | 13.57 (457)   | 23.15             | 19.47         |
| 3;IMP;PL;POS;V  | 11.89 (244)       | 10.28 (457)   | 22.13             | 19.04         |
| 2;PRS;SG;V      | 12.75 (204)       | 7.22 (457)    | 23.04             | 12.25         |
| 2;PRS;SBJV;SG;V | 13.33 (180)       | 8.53 (457)    | 29.44             | 18.16         |
| 3;IMP;POS;SG;V  | 16.05 (324)       | 13.57 (457)   | 23.15             | 19.47         |
| 1;IMP;PL;POS;V  | 29.63 (81)        | 21.44 (471)   | 79.01             | 65.61         |
| 2;COND;PL;V     | 0.00 (1)          | 1.53 (457)    | 0                 | 5.47          |
| 2;IMP;POS;SG;V  | 46.94 (409)       | 42.46 (471)   | 69.44             | 62.63         |
| 2;COND;SG;V     | 0.00 (8)          | 0.00 (457)    | 0                 | 1.53          |
| 2;PL;PRS;SBJV;V | 0.00 (13)         | 0.22 (457)    | 0                 | 0.22          |
| 2;IPFV;PST;SG;V | 0.00 (16)         | 1.09 (457)    | 0                 | 1.09          |
| 3;COND;SG;V     | 3.74 (187)        | 4.15 (458)    | 7.49              | 10.92         |
| 3;IPFV;PL;PST;V | 55.26 (304)       | 49.02 (457)   | 95.07             | 96.06         |
| 2;PFV;PL;PST;V  | 0.00 (2)          | 1.75 (457)    | 0                 | 2.84          |
| 3;PL;PRS;SBJV;V | 11.89 (244)       | 10.28 (457)   | 22.13             | 19.04         |
| 1;PL;PRS;V      | 32.28 (158)       | 26.26 (457)   | 72.78             | 64.33         |
| 3;FUT;PL;V      | 44.14 (145)       | 33.26 (457)   | 86.9              | 89.93         |
| 3;FUT;SG;V      | 45.29 (223)       | 37.12 (458)   | 87.44             | 81.88         |
| 3;PRS;SG;V      | 46.89 (418)       | 44.32 (458)   | 70.57             | 65.28         |
| 1;PFV;PST;SG;V  | 0.00 (112)        | 2.19 (457)    | 2.68              | 3.5           |
| 1;PL;PST;SBJV;V | 0.00 (2)          | 5.03 (457)    | 50                | 10.28         |
| 1;IPFV;PST;SG;V | 62.76 (145)       | 48.36 (457)   | 91.72             | 85.34         |
| 1;PFV;PL;PST;V  | 29.17 (48)        | 23.63 (457)   | 66.67             | 55.58         |
| 1;PRS;SG;V      | 28.52 (291)       | 21.66 (457)   | 45.02             | 31.73         |
| 3;PL;PST;SBJV;V | 50.42 (119)       | 42.01 (457)   | 86.55             | 90.15         |

Table 118: The performance of [Ruder et al. \(2018\)](#)’s model on translating words belonging to a specific morphological category for the Spanish–Italian language pair (the grey numbers correspond to the dictionary sizes).

| Spanish–Portuguese |                   |               |                   |               |
|--------------------|-------------------|---------------|-------------------|---------------|
| Morph              | Normal (In vocab) | Normal (+OOV) | Lexeme (In vocab) | Lexeme (+OOV) |
| ALL                | 57.30 (9732)      | 35.37 (23197) | 81.49             | 55.12         |
| N;SG               | 63.46 (2066)      | 62.00 (2113)  | 90.42             | 90.01         |
| N;PL               | 62.35 (1692)      | 59.51 (1904)  | 92.20             | 92.49         |
| ADJ;FEM;PL         | 73.58 (439)       | 72.75 (444)   | 99.09             | 99.1          |
| ADJ;MASC;PL        | 72.10 (448)       | 70.66 (467)   | 97.54             | 97.86         |
| ADJ;FEM;SG         | 72.59 (456)       | 72.11 (459)   | 96.71             | 96.08         |
| ADJ;MASC;SG        | 72.55 (459)       | 71.28 (470)   | 96.08             | 95.11         |
| 1;PL;PRS;SBJV;V    | 20.75 (53)        | 22.58 (465)   | 35.85             | 38.71         |
| 3;PFV;PST;SG;V     | 59.18 (365)       | 50.97 (465)   | 81.37             | 73.12         |
| 3;PRS;SBJV;SG;V    | 41.61 (310)       | 34.91 (464)   | 52.26             | 43.97         |
| 3;FUT;PL;V         | 49.12 (114)       | 45.38 (465)   | 64.04             | 86.67         |
| 2;PL;PRS;V         | 6.67 (15)         | 0.22 (465)    | 6.67              | 0.22          |
| 3;COND;PL;V        | 59.70 (134)       | 45.38 (465)   | 79.85             | 81.94         |
| 1;IPFV;PL;PST;V    | 50.00 (8)         | 27.31 (465)   | 75.00             | 85.81         |
| 2;FUT;PL;SBJV;V    | -                 | 0.22 (465)    | -                 | 0.86          |
| 2;IMP;PL;POS;V     | 0.00 (36)         | 2.80 (465)    | 2.78              | 3.87          |
| 2;PRS;SBJV;SG;V    | 33.33 (123)       | 28.23 (464)   | 43.90             | 35.56         |
| 1;COND;SG;V        | 48.15 (216)       | 31.18 (465)   | 62.96             | 44.95         |
| 3;IMP;PL;POS;V     | 39.47 (228)       | 29.53 (464)   | 56.58             | 45.69         |
| 3;IMP;POS;SG;V     | 41.61 (310)       | 34.91 (464)   | 52.26             | 43.97         |
| 3;IPFV;PST;SG;V    | 59.71 (340)       | 52.04 (465)   | 83.82             | 83.23         |
| 2;PRS;SG;V         | 37.79 (172)       | 36.21 (464)   | 45.35             | 43.97         |
| 2;IPFV;PST;SG;V    | 22.22 (9)         | 14.19 (465)   | 44.44             | 19.78         |
| 1;COND;PL;V        | 54.55 (11)        | 46.88 (465)   | 63.64             | 83.44         |
| 1;FUT;PL;SBJV;V    | -                 | 5.59 (465)    | -                 | 11.18         |
| 3;FUT;PL;SBJV;V    | 28.57 (7)         | 7.74 (465)    | 28.57             | 13.33         |
| 2;FUT;PL;V         | 0.00 (2)          | 0.00 (465)    | 0.00              | 0             |
| 3;FUT;SBJV;SG;V    | 13.95 (43)        | 17.42 (465)   | 20.93             | 22.8          |
| NFIN;V             | 58.89 (433)       | 56.56 (465)   | 91.69             | 86.67         |
| 2;IPFV;PL;PST;V    | -                 | 0.22 (465)    | -                 | 0.43          |
| 2;PFV;PL;PST;V     | -                 | 0.86 (465)    | -                 | 1.51          |
| 2;FUT;SG;V         | 37.50 (16)        | 19.57 (465)   | 37.50             | 35.27         |
| 3;COND;SG;V        | 48.15 (216)       | 31.18 (465)   | 62.96             | 44.95         |
| 2;IMP;POS;SG;V     | 52.87 (418)       | 48.49 (464)   | 69.86             | 62.28         |
| 3;PFV;PL;PST;V     | 62.18 (312)       | 53.12 (465)   | 93.27             | 90.75         |
| 1;PFV;PL;PST;V     | 55.56 (81)        | 39.57 (465)   | 66.67             | 53.98         |
| 3;PL;PRS;V         | 58.78 (376)       | 50.43 (464)   | 81.65             | 73.71         |
| 1;PL;PRS;V         | 59.48 (153)       | 39.35 (465)   | 69.28             | 54.84         |
| 1;FUT;SG;V         | 47.62 (63)        | 46.67 (465)   | 57.14             | 77.85         |
| 3;PL;PRS;SBJV;V    | 39.47 (228)       | 29.53 (464)   | 56.58             | 45.69         |
| 3;PRS;SG;V         | 53.43 (423)       | 49.57 (464)   | 70.21             | 63.36         |
| 2;FUT;SBJV;SG;V    | 50.00 (4)         | 26.67 (465)   | 75.00             | 33.98         |
| 1;FUT;SBJV;SG;V    | 13.95 (43)        | 17.42 (465)   | 20.93             | 22.8          |
| 2;PFV;PST;SG;V     | 30.00 (30)        | 28.82 (465)   | 36.67             | 36.99         |
| 2;COND;SG;V        | 0.00 (4)          | 16.56 (465)   | 25.00             | 29.25         |
| 1;PRS;SBJV;SG;V    | 41.61 (310)       | 34.91 (464)   | 52.26             | 43.97         |
| 2;PL;PRS;SBJV;V    | 0.00 (3)          | 0.86 (465)    | 0.00              | 0.86          |
| 3;FUT;SG;V         | 59.69 (191)       | 54.19 (465)   | 81.15             | 90.75         |
| 1;IMP;PL;POS;V     | 20.75 (53)        | 22.58 (465)   | 35.85             | 38.71         |
| 1;IPFV;PST;SG;V    | 59.71 (340)       | 52.04 (465)   | 83.82             | 83.23         |
| 1;PRS;SG;V         | 41.20 (284)       | 37.37 (463)   | 52.11             | 48.6          |
| 2;COND;PL;V        | -                 | 0.00 (465)    | -                 | 0             |
| 1;PFV;PST;SG;V     | 32.87 (143)       | 14.84 (465)   | 51.75             | 23.01         |
| 3;IPFV;PL;PST;V    | 60.26 (307)       | 53.33 (465)   | 93.16             | 97.42         |
| 1;FUT;PL;V         | 42.11 (38)        | 45.59 (465)   | 52.63             | 83.01         |

Table 119: The performance of [Ruder et al. \(2018\)](#)’s model on translating words belonging to a specific morphological category for the Spanish–Portuguese language pair (the grey numbers correspond to the dictionary sizes).

| Russian–Czech        |                   |               |                   |               |
|----------------------|-------------------|---------------|-------------------|---------------|
| Morph                | Normal (In vocab) | Normal (+OOV) | Lexeme (In vocab) | Lexeme (+OOV) |
| ALL                  | 33.09 (5708)      | 27.16 (7538)  | 77.33             | 73.08         |
| INS;N;PL             | 27.08 (373)       | 22.16 (537)   | 80.7              | 80.26         |
| DAT;N;SG             | 21.23 (457)       | 17.69 (554)   | 51.42             | 44.58         |
| ESS;N;PL             | 40.79 (304)       | 28.12 (537)   | 88.16             | 86.59         |
| ACC;N;SG             | 34.90 (533)       | 33.03 (557)   | 70.17             | 67.32         |
| N;NOM;PL             | 34.56 (489)       | 32.02 (531)   | 75.87             | 72.5          |
| DAT;N;PL             | 43.49 (269)       | 30.73 (537)   | 90.33             | 89.57         |
| ACC;N;PL             | 28.78 (271)       | 26.16 (302)   | 73.8              | 69.54         |
| GEN;N;SG             | 33.46 (535)       | 32.19 (556)   | 71.4              | 68.88         |
| INS;N;SG             | 34.84 (488)       | 30.70 (557)   | 80.74             | 78.46         |
| ESS;N;SG             | 24.89 (466)       | 21.01 (557)   | 55.36             | 47.94         |
| GEN;N;PL             | 34.08 (449)       | 29.00 (538)   | 74.61             | 69.33         |
| N;NOM;SG             | 35.12 (541)       | 34.12 (551)   | 72.83             | 69.87         |
| ACC;ADJ;INAN;MASC;SG | 45.54 (101)       | 43.81 (105)   | 97.03             | 97.14         |
| ADJ;GEN;PL           | 42.11 (95)        | 37.50 (112)   | 98.95             | 99.11         |
| ACC;ADJ;NEUT;SG      | 25.00 (100)       | 23.21 (112)   | 82                | 78.57         |
| ADJ;FEM;NOM;SG       | 46.32 (95)        | 41.90 (105)   | 96.84             | 97.14         |
| ADJ;DAT;FEM;SG       | 33.33 (105)       | 31.25 (112)   | 72.38             | 66.96         |
| ADJ;NEUT;NOM;SG      | 26.60 (94)        | 24.76 (105)   | 82.98             | 79.05         |
| ADJ;MASC;NOM;SG      | 45.54 (101)       | 43.81 (105)   | 97.03             | 97.14         |
| ADJ;DAT;PL           | 47.37 (95)        | 41.96 (112)   | 98.95             | 99.11         |
| ADJ;INS;PL           | 48.78 (82)        | 40.18 (112)   | 100               | 100           |
| ADJ;ESS;PL           | 42.11 (95)        | 37.50 (112)   | 98.95             | 99.11         |
| ACC;ADJ;FEM;SG       | 42.86 (98)        | 37.50 (112)   | 98.98             | 97.32         |
| ADJ;GEN;MASC;SG      | 42.16 (102)       | 38.39 (112)   | 100               | 100           |
| ADJ;GEN;NEUT;SG      | 42.16 (102)       | 38.39 (112)   | 100               | 100           |
| ADJ;ESS;NEUT;SG      | 53.49 (86)        | 45.54 (112)   | 97.67             | 96.43         |
| ADJ;INS;MASC;SG      | 47.37 (95)        | 41.96 (112)   | 98.95             | 99.11         |
| ADJ;DAT;MASC;SG      | 52.17 (69)        | 42.86 (112)   | 100               | 100           |
| ADJ;ESS;MASC;SG      | 53.57 (84)        | 45.54 (112)   | 98.81             | 96.43         |
| ACC;ADJ;MASC;SG      | 42.16 (102)       | 38.39 (112)   | 100               | 100           |
| ADJ;ESS;FEM;SG       | 33.33 (105)       | 31.25 (112)   | 72.38             | 66.96         |
| ADJ;DAT;NEUT;SG      | 52.17 (69)        | 42.86 (112)   | 100               | 100           |
| ADJ;FEM;GEN;SG       | 33.33 (105)       | 31.25 (112)   | 72.38             | 66.96         |
| 3;MASC;PL;PST;V      | 32.39 (71)        | 25.26 (95)    | 92.96             | 87.37         |
| 2;PL;PRS;V           | 26.67 (15)        | 11.86 (59)    | 100               | 84.75         |
| 1;PL;PRS;V           | 26.67 (15)        | 11.86 (59)    | 86.67             | 55.93         |
| 3;FEM;PST;SG;V       | 30.43 (69)        | 25.26 (95)    | 94.2              | 84.21         |
| 2;IMP;SG;V           | 6.25 (16)         | 3.19 (94)     | 37.5              | 17.02         |
| 3;FEM;PL;PST;V       | 30.77 (65)        | 25.26 (95)    | 89.23             | 87.37         |
| 3;NEUT;PST;SG;V      | 28.89 (45)        | 18.95 (95)    | 80                | 74.74         |
| 2;PRS;SG;V           | 28.57 (7)         | 15.25 (59)    | 71.43             | 59.32         |
| 2;IMP;PL;V           | 17.65 (17)        | 9.57 (94)     | 52.94             | 55.32         |
| 1;PRS;SG;V           | 28.57 (21)        | 13.56 (59)    | 71.43             | 38.98         |
| 3;PL;PRS;V           | 20.93 (43)        | 15.25 (59)    | 72.09             | 62.71         |
| NFIN;V               | 28.21 (117)       | 27.20 (125)   | 100               | 97.6          |
| 3;MASC;PST;SG;V      | 25.30 (83)        | 22.58 (93)    | 89.16             | 83.87         |
| 3;PRS;SG;V           | 20.37 (54)        | 18.64 (59)    | 77.78             | 69.49         |
| 2;FUT;PL;V           | 0.00 (4)          | 2.70 (37)     | 50                | 54.05         |
| 2;FUT;SG;V           | 0.00 (1)          | 10.81 (37)    | 100               | 45.95         |
| 1;FUT;PL;V           | 0.00 (5)          | 2.70 (37)     | 80                | 21.62         |
| 1;FUT;SG;V           | 14.29 (7)         | 2.70 (37)     | 28.57             | 13.51         |
| 3;FUT;SG;V           | 14.29 (28)        | 13.51 (37)    | 46.43             | 43.24         |
| 3;FUT;PL;V           | 4.55 (22)         | 2.70 (37)     | 40.91             | 35.14         |
| ACC;INAN;N;SG        | 0.00 (1)          | 50.00 (2)     | 0                 | 50            |
| ACC;INAN;N;PL        | 0.00 (1)          | 50.00 (2)     | 100               | 100           |
| ADJ;INS;NEUT;SG      | 22.22 (9)         | 16.67 (12)    | 100               | 100           |
| ADJ;FEM;INS;SG       | 36.36 (11)        | 33.33 (12)    | 100               | 100           |
| ACC;ADJ;PL           | 27.27 (11)        | 25.00 (12)    | 100               | 100           |
| ADJ;NOM;PL           | 20.00 (10)        | 16.67 (12)    | 90                | 83.33         |
| 2;FEM;PL;PST;V       | 0.00 (1)          | 0.00 (1)      | 0                 | 0             |
| 2;MASC;PL;PST;V      | 0.00 (1)          | 0.00 (1)      | 0                 | 0             |

Table 120: The performance of [Ruder et al. \(2018\)](#)’s model on translating words belonging to a specific morphological category for the Russian–Czech language pair (the grey numbers correspond to the dictionary sizes).

| Russian–Polish       |                   |               |                   |               |
|----------------------|-------------------|---------------|-------------------|---------------|
| Morph                | Normal (In vocab) | Normal (+OOV) | Lexeme (In vocab) | Lexeme (+OOV) |
| ALL                  | 39.80 (9183)      | 34.78 (11697) | 80.81             | 77.71         |
| DAT;N;SG             | 26.34 (653)       | 22.92 (999)   | 56.66             | 53.65         |
| INS;N;SG             | 39.14 (879)       | 35.40 (1000)  | 83.05             | 80.1          |
| ACC;N;SG             | 38.30 (953)       | 36.30 (1000)  | 73.45             | 71.2          |
| GEN;N;SG             | 40.83 (960)       | 39.30 (1000)  | 80.10             | 77.4          |
| ESS;N;SG             | 31.46 (782)       | 27.56 (998)   | 62.28             | 56.01         |
| N;NOM;SG             | 36.78 (976)       | 35.95 (993)   | 72.13             | 69.89         |
| INS;N;PL             | 45.58 (634)       | 36.34 (930)   | 98.58             | 98.82         |
| GEN;N;PL             | 40.37 (805)       | 36.10 (928)   | 76.27             | 70.8          |
| DAT;N;PL             | 36.03 (358)       | 28.17 (930)   | 73.46             | 75.7          |
| ESS;N;PL             | 46.40 (541)       | 35.70 (930)   | 89.65             | 87.53         |
| ACC;N;PL             | 36.79 (579)       | 34.28 (633)   | 78.58             | 74.41         |
| N;NOM;PL             | 39.86 (863)       | 37.70 (923)   | 82.50             | 79.63         |
| ACC;ADJ;INAN;MASC;SG | 48.63 (183)       | 47.89 (190)   | 93.44             | 93.68         |
| ADJ;GEN;PL           | 50.00 (180)       | 47.89 (190)   | 98.33             | 98.42         |
| ADJ;DAT;PL           | 46.67 (180)       | 45.26 (190)   | 94.44             | 94.74         |
| ADJ;FEM;GEN;SG       | 46.11 (180)       | 44.74 (190)   | 93.33             | 93.16         |
| ADJ;ESS;NEUT;SG      | 40.72 (167)       | 36.84 (190)   | 82.63             | 81.58         |
| ACC;ADJ;NEUT;SG      | 39.11 (179)       | 37.89 (190)   | 81.56             | 80.53         |
| ADJ;DAT;MASC;SG      | 51.33 (113)       | 45.79 (190)   | 95.58             | 98.95         |
| ADJ;INS;NEUT;SG      | 46.67 (180)       | 45.26 (190)   | 94.44             | 94.74         |
| ACC;ADJ;MASC;SG      | 44.57 (184)       | 43.68 (190)   | 96.20             | 96.32         |
| ADJ;GEN;MASC;SG      | 44.57 (184)       | 43.68 (190)   | 96.20             | 96.32         |
| ADJ;GEN;NEUT;SG      | 44.57 (184)       | 43.68 (190)   | 96.20             | 96.32         |
| ADJ;ESS;FEM;SG       | 46.11 (180)       | 44.74 (190)   | 93.33             | 93.16         |
| ADJ;NEUT;NOM;SG      | 39.11 (179)       | 37.89 (190)   | 81.56             | 80.53         |
| ADJ;INS;MASC;SG      | 46.67 (180)       | 45.26 (190)   | 94.44             | 94.74         |
| ADJ;FEM;NOM;SG       | 45.36 (183)       | 44.21 (190)   | 96.17             | 96.32         |
| ADJ;MASC;NOM;SG      | 48.63 (183)       | 47.89 (190)   | 93.44             | 93.68         |
| ADJ;DAT;FEM;SG       | 46.11 (180)       | 44.74 (190)   | 93.33             | 93.16         |
| ADJ;ESS;PL           | 50.00 (180)       | 47.89 (190)   | 98.33             | 98.42         |
| ACC;ADJ;FEM;SG       | 45.56 (169)       | 41.58 (190)   | 99.41             | 98.95         |
| ADJ;FEM;INS;SG       | 46.89 (177)       | 44.74 (190)   | 92.66             | 93.16         |
| ADJ;INS;PL           | 49.39 (164)       | 45.26 (190)   | 100.00            | 100           |
| ADJ;ESS;MASC;SG      | 40.72 (167)       | 36.84 (190)   | 82.63             | 81.58         |
| ADJ;DAT;NEUT;SG      | 51.33 (113)       | 45.79 (190)   | 95.58             | 98.95         |
| ADJ;NOM;PL           | 47.28 (184)       | 46.32 (190)   | 91.30             | 91.05         |
| ACC;ADJ;PL           | 49.18 (183)       | 47.89 (190)   | 96.72             | 98.42         |
| NFIN;V               | 40.00 (30)        | 36.36 (33)    | 96.67             | 96.97         |
| 2;MASC;PL;PST;V      | -                 | 21.21 (33)    | -                 | 84.85         |
| 3;MASC;PST;SG;V      | 38.10 (21)        | 27.27 (33)    | 90.48             | 90.91         |
| 2;PRS;SG;V           | 25.00 (4)         | 8.00 (25)     | 75.00             | 20            |
| 2;IMP;SG;V           | 0.00 (10)         | 3.03 (33)     | 50.00             | 21.21         |
| 1;FEM;PST;SG;V       | 20.00 (5)         | 30.30 (33)    | 100.00            | 87.88         |
| 3;MASC;PL;PST;V      | 30.00 (20)        | 21.21 (33)    | 80.00             | 84.85         |
| 2;PL;PRS;V           | 0.00 (1)          | 0.00 (25)     | 0.00              | 0             |
| 2;MASC;PST;SG;V      | 25.00 (4)         | 27.27 (33)    | 75.00             | 90.91         |
| 1;PL;PRS;V           | 22.22 (9)         | 12.00 (25)    | 88.89             | 32            |
| 3;NEUT;PST;SG;V      | 38.46 (13)        | 24.24 (33)    | 84.62             | 84.85         |
| 3;FEM;PST;SG;V       | 42.86 (21)        | 30.30 (33)    | 90.48             | 87.88         |
| 2;IMP;PL;V           | 0.00 (4)          | 0.00 (33)     | 25.00             | 12.12         |
| 3;PL;PRS;V           | 33.33 (18)        | 24.00 (25)    | 72.22             | 72            |
| 2;FEM;PST;SG;V       | -                 | 30.30 (33)    | -                 | 87.88         |
| 1;FEM;PL;PST;V       | -                 | 21.21 (33)    | -                 | 84.85         |
| 2;FEM;PL;PST;V       | -                 | 21.21 (33)    | -                 | 84.85         |
| 1;MASC;PST;SG;V      | 28.57 (14)        | 27.27 (33)    | 85.71             | 90.91         |
| 3;PRS;SG;V           | 20.83 (24)        | 20.00 (25)    | 70.83             | 64            |
| 1;MASC;PL;PST;V      | 20.00 (5)         | 21.21 (33)    | 100.00            | 84.85         |
| 3;FEM;PL;PST;V       | 33.33 (18)        | 21.21 (33)    | 83.33             | 84.85         |
| 1;PRS;SG;V           | 44.44 (9)         | 16.00 (25)    | 66.67             | 24            |
| 1;FUT;SG;V           | 0.00 (2)          | 0.00 (8)      | 0.00              | 0             |
| 3;FUT;SG;V           | 0.00 (7)          | 0.00 (8)      | 57.14             | 50            |
| 2;FUT;SG;V           | -                 | 12.50 (8)     | -                 | 50            |
| 3;FUT;PL;V           | 0.00 (6)          | 0.00 (8)      | 33.33             | 37.5          |
| 1;FUT;PL;V           | -                 | 0.00 (8)      | -                 | 25            |
| 2;FUT;PL;V           | 0.00 (2)          | 0.00 (8)      | 0.00              | 0             |

Table 121: The performance of [Ruder et al. \(2018\)](#)’s model on translating words belonging to a specific morphological category for the Russian–Polish language pair (the grey numbers correspond to the dictionary sizes).

| Russian–Slovak       |                   |               |                   |               |
|----------------------|-------------------|---------------|-------------------|---------------|
| Morph                | Normal (In vocab) | Normal (+OOV) | Lexeme (In vocab) | Lexeme (+OOV) |
| ALL                  | 25.65 (1610)      | 20.93 (2150)  | 79.25             | 76.05         |
| ACC;N;PL             | 16.48 (91)        | 13.76 (109)   | 75.82             | 66.06         |
| ESS;N;PL             | 40.74 (81)        | 23.28 (189)   | 97.53             | 92.06         |
| INS;N;SG             | 25.49 (153)       | 20.21 (193)   | 85.62             | 83.42         |
| INS;N;PL             | 33.33 (105)       | 23.81 (189)   | 99.05             | 98.94         |
| N;NOM;SG             | 26.34 (186)       | 25.79 (190)   | 74.73             | 73.16         |
| GEN;N;PL             | 22.82 (149)       | 17.99 (189)   | 68.46             | 60.85         |
| ACC;N;SG             | 22.03 (177)       | 20.21 (193)   | 75.14             | 73.58         |
| ESS;N;SG             | 22.63 (137)       | 17.10 (193)   | 62.77             | 51.3          |
| GEN;N;SG             | 23.73 (177)       | 21.24 (193)   | 71.19             | 67.88         |
| DAT;N;SG             | 21.97 (132)       | 17.10 (193)   | 65.15             | 57.51         |
| DAT;N;PL             | 28.42 (95)        | 18.09 (188)   | 72.63             | 72.87         |
| N;NOM;PL             | 23.17 (164)       | 21.51 (186)   | 78.05             | 73.12         |
| 3;MASC;PST;SG;V      | -                 | 0.00 (2)      | -                 | 0             |
| 2;IMP;PL;V           | -                 | 0.00 (2)      | -                 | 0             |
| 2;PRS;SG;V           | -                 | 0.00 (2)      | -                 | 50            |
| 1;PL;PRS;V           | -                 | 50.00 (2)     | -                 | 100           |
| 3;FEM;PST;SG;V       | -                 | 0.00 (2)      | -                 | 0             |
| 2;IMP;SG;V           | -                 | 0.00 (2)      | -                 | 0             |
| NFIN;V               | 25.00 (40)        | 18.75 (48)    | 100.00            | 100           |
| 1;PRS;SG;V           | 0.00 (1)          | 0.00 (2)      | 100.00            | 50            |
| 3;PL;PRS;V           | 0.00 (2)          | 0.00 (2)      | 50.00             | 50            |
| 2;PL;PRS;V           | -                 | 0.00 (2)      | -                 | 50            |
| 3;NEUT;PST;SG;V      | -                 | 0.00 (2)      | -                 | 0             |
| 3;FEM;PL;PST;V       | -                 | 0.00 (2)      | -                 | 0             |
| 3;PRS;SG;V           | 0.00 (2)          | 0.00 (2)      | 50.00             | 50            |
| 3;MASC;PL;PST;V      | -                 | 0.00 (2)      | -                 | 0             |
| ADJ;FEM;GEN;SG       | 26.09 (23)        | 25.00 (24)    | 95.65             | 95.83         |
| ADJ;ESS;NEUT;SG      | 33.33 (21)        | 37.50 (24)    | 80.95             | 83.33         |
| ADJ;DAT;FEM;SG       | 26.09 (23)        | 25.00 (24)    | 95.65             | 95.83         |
| ADJ;GEN;PL           | 25.00 (24)        | 25.00 (24)    | 95.83             | 95.83         |
| ADJ;NOM;PL           | 21.74 (23)        | 25.00 (24)    | 73.91             | 75            |
| ADJ;FEM;NOM;SG       | 30.43 (23)        | 33.33 (24)    | 100.00            | 100           |
| ACC;ADJ;PL           | 26.09 (23)        | 25.00 (24)    | 95.65             | 95.83         |
| ADJ;NEUT;NOM;SG      | 21.74 (23)        | 20.83 (24)    | 73.91             | 75            |
| ADJ;INS;NEUT;SG      | 33.33 (24)        | 33.33 (24)    | 100.00            | 100           |
| ADJ;INS;MASC;SG      | 33.33 (24)        | 33.33 (24)    | 100.00            | 100           |
| ADJ;FEM;INS;SG       | 28.57 (21)        | 25.00 (24)    | 95.24             | 95.83         |
| ADJ;ESS;FEM;SG       | 26.09 (23)        | 25.00 (24)    | 95.65             | 95.83         |
| ACC;ADJ;INAN;MASC;SG | 41.67 (24)        | 41.67 (24)    | 87.50             | 87.5          |
| ACC;ADJ;FEM;SG       | 13.04 (23)        | 12.50 (24)    | 95.65             | 95.83         |
| ADJ;ESS;PL           | 25.00 (24)        | 25.00 (24)    | 95.83             | 95.83         |
| ADJ;GEN;MASC;SG      | 37.50 (24)        | 37.50 (24)    | 91.67             | 91.67         |
| ACC;ADJ;MASC;SG      | 37.50 (24)        | 37.50 (24)    | 91.67             | 91.67         |
| ADJ;GEN;NEUT;SG      | 37.50 (24)        | 37.50 (24)    | 91.67             | 91.67         |
| ADJ;ESS;MASC;SG      | 33.33 (21)        | 37.50 (24)    | 80.95             | 83.33         |
| ADJ;DAT;PL           | 33.33 (24)        | 33.33 (24)    | 100.00            | 100           |
| ADJ;DAT;NEUT;SG      | 33.33 (21)        | 20.83 (24)    | 100.00            | 100           |
| ACC;ADJ;NEUT;SG      | 21.74 (23)        | 20.83 (24)    | 73.91             | 75            |
| ADJ;MASC;NOM;SG      | 41.67 (24)        | 41.67 (24)    | 87.50             | 87.5          |
| ADJ;DAT;MASC;SG      | 33.33 (21)        | 20.83 (24)    | 100.00            | 100           |
| ADJ;INS;PL           | 36.36 (22)        | 41.67 (24)    | 100.00            | 100           |

Table 122: The performance of [Ruder et al. \(2018\)](#)’s model on translating words belonging to a specific morphological category for the Russian–Slovak language pair (the grey numbers correspond to the dictionary sizes).

| Russian–Ukrainian    |                   |               |                   |               |
|----------------------|-------------------|---------------|-------------------|---------------|
| Morph                | Normal (In vocab) | Normal (+OOV) | Lexeme (In vocab) | Lexeme (+OOV) |
| ALL                  | 47.90 (1165)      | 43.84 (1396)  | 83.26             | 82.09         |
| N;NOM;SG             | 48.63 (146)       | 48.30 (147)   | 81.51             | 81.63         |
| N;NOM;PL             | 47.48 (139)       | 47.48 (139)   | 79.86             | 79.86         |
| GEN;N;SG             | 46.90 (145)       | 46.58 (146)   | 81.38             | 80.82         |
| GEN;N;PL             | 43.51 (131)       | 41.43 (140)   | 79.39             | 77.14         |
| ESS;N;PL             | 60.24 (83)        | 48.92 (139)   | 93.98             | 94.24         |
| DAT;N;PL             | 58.57 (70)        | 47.48 (139)   | 95.71             | 94.96         |
| ACC;N;PL             | 27.12 (59)        | 26.23 (61)    | 74.58             | 73.77         |
| DAT;N;SG             | 35.20 (125)       | 29.25 (147)   | 60.00             | 50.34         |
| ESS;N;SG             | 41.41 (128)       | 36.05 (147)   | 66.41             | 60.54         |
| ACC;N;SG             | 47.92 (144)       | 46.94 (147)   | 80.56             | 80.27         |
| INS;N;SG             | 52.21 (136)       | 48.30 (147)   | 93.38             | 90.48         |
| INS;N;PL             | 57.58 (99)        | 48.20 (139)   | 100.00            | 100           |
| ADJ;ESS;PL           | 33.33 (3)         | 33.33 (3)     | 100.00            | 100           |
| ACC;ADJ;INAN;MASC;SG | 0.00 (3)          | 0.00 (3)      | 100.00            | 100           |
| ADJ;DAT;PL           | 33.33 (3)         | 33.33 (3)     | 100.00            | 100           |
| ACC;ADJ;PL           | 33.33 (3)         | 33.33 (3)     | 100.00            | 100           |
| ADJ;DAT;NEUT;SG      | -                 | 0.00 (3)      | -                 | 0             |
| ADJ;NOM;PL           | 33.33 (3)         | 33.33 (3)     | 100.00            | 100           |
| ACC;ADJ;FEM;SG       | 33.33 (3)         | 33.33 (3)     | 100.00            | 100           |
| ADJ;DAT;MASC;SG      | -                 | 0.00 (3)      | -                 | 0             |
| ADJ;FEM;INS;SG       | 33.33 (3)         | 33.33 (3)     | 100.00            | 100           |
| ADJ;INS;NEUT;SG      | 33.33 (3)         | 33.33 (3)     | 100.00            | 100           |
| ADJ;GEN;PL           | 33.33 (3)         | 33.33 (3)     | 100.00            | 100           |
| ADJ;DAT;FEM;SG       | -                 | 33.33 (3)     | -                 | 100           |
| ADJ;ESS;NEUT;SG      | -                 | 33.33 (3)     | -                 | 100           |
| ADJ;ESS;FEM;SG       | -                 | 33.33 (3)     | -                 | 100           |
| ACC;ADJ;INAN;PL      | 33.33 (3)         | 33.33 (3)     | 100.00            | 100           |
| ADJ;GEN;MASC;SG      | 33.33 (3)         | 33.33 (3)     | 100.00            | 100           |
| ADJ;GEN;NEUT;SG      | 33.33 (3)         | 33.33 (3)     | 100.00            | 100           |
| ACC;ADJ;NEUT;SG      | 33.33 (3)         | 33.33 (3)     | 100.00            | 100           |
| ADJ;INS;PL           | 33.33 (3)         | 33.33 (3)     | 100.00            | 100           |
| ADJ;FEM;NOM;SG       | 33.33 (3)         | 33.33 (3)     | 100.00            | 100           |
| ADJ;ESS;MASC;SG      | -                 | 33.33 (3)     | -                 | 100           |
| ADJ;MASC;NOM;SG      | 0.00 (3)          | 0.00 (3)      | 100.00            | 100           |
| ADJ;NEUT;NOM;SG      | 33.33 (3)         | 33.33 (3)     | 100.00            | 100           |
| ADJ;FEM;GEN;SG       | 33.33 (3)         | 33.33 (3)     | 100.00            | 100           |
| ADJ;INS;MASC;SG      | 33.33 (3)         | 33.33 (3)     | 100.00            | 100           |
| ACC;ADJ;MASC;SG      | 33.33 (3)         | 33.33 (3)     | 100.00            | 100           |
| 3;PRS;SG;V           | 66.67 (3)         | 66.67 (3)     | 100.00            | 100           |
| 2;IMP;SG;V           | 66.67 (3)         | 66.67 (3)     | 66.67             | 66.67         |
| 3;NEUT;PST;SG;V      | 66.67 (3)         | 66.67 (3)     | 100.00            | 100           |
| 2;MASC;PL;PST;V      | 66.67 (3)         | 66.67 (3)     | 100.00            | 100           |
| 3;MASC;PST;SG;V      | 66.67 (3)         | 66.67 (3)     | 100.00            | 100           |
| 2;PL;PRS;V           | 50.00 (2)         | 33.33 (3)     | 100.00            | 100           |
| 3;MASC;PL;PST;V      | 66.67 (3)         | 66.67 (3)     | 100.00            | 100           |
| 1;MASC;PL;PST;V      | 66.67 (3)         | 66.67 (3)     | 100.00            | 100           |
| 3;PL;PRS;V           | 66.67 (3)         | 66.67 (3)     | 100.00            | 100           |
| 2;IMP;PL;V           | 0.00 (3)          | 0.00 (3)      | 66.67             | 66.67         |
| 2;FEM;PST;SG;V       | 66.67 (3)         | 66.67 (3)     | 100.00            | 100           |
| 1;PRS;SG;V           | 33.33 (3)         | 33.33 (3)     | 33.33             | 33.33         |
| 1;FEM;PST;SG;V       | 66.67 (3)         | 66.67 (3)     | 100.00            | 100           |
| 1;PL;PRS;V           | 33.33 (3)         | 33.33 (3)     | 100.00            | 100           |
| 2;FEM;PL;PST;V       | 66.67 (3)         | 66.67 (3)     | 100.00            | 100           |
| 2;MASC;PST;SG;V      | 66.67 (3)         | 66.67 (3)     | 100.00            | 100           |
| 3;FEM;PL;PST;V       | 66.67 (3)         | 66.67 (3)     | 100.00            | 100           |
| 1;MASC;PST;SG;V      | 66.67 (3)         | 66.67 (3)     | 100.00            | 100           |
| 2;PRS;SG;V           | 100.00 (2)        | 66.67 (3)     | 100.00            | 100           |
| NFIN;V               | 66.67 (3)         | 66.67 (3)     | 100.00            | 100           |
| 3;FEM;PST;SG;V       | 66.67 (3)         | 66.67 (3)     | 100.00            | 100           |
| 1;FEM;PL;PST;V       | 66.67 (3)         | 66.67 (3)     | 100.00            | 100           |

Table 123: The performance of [Ruder et al. \(2018\)](#)’s model on translating words belonging to a specific morphological category for the Russian–Ukrainian language pair (the grey numbers correspond to the dictionary sizes).



| Slovak–Czech         |                   |               |                   |               |
|----------------------|-------------------|---------------|-------------------|---------------|
| Morph                | Normal (In vocab) | Normal (+OOV) | Lexeme (In vocab) | Lexeme (+OOV) |
| ALL                  | 58.04 (858)       | 49.22 (1154)  | 91.14             | 89.25         |
| GEN;N;SG             | 70.67 (75)        | 69.74 (76)    | 88.00             | 86.84         |
| DAT;N;PL             | 71.43 (42)        | 55.13 (78)    | 97.62             | 94.87         |
| ESS;N;SG             | 56.60 (53)        | 46.05 (76)    | 81.13             | 69.74         |
| N;NOM;PL             | 62.69 (67)        | 56.41 (78)    | 79.10             | 75.64         |
| ACC;N;SG             | 73.61 (72)        | 69.74 (76)    | 87.50             | 86.84         |
| INS;N;SG             | 64.52 (62)        | 57.89 (76)    | 93.55             | 93.42         |
| N;NOM;SG             | 69.74 (76)        | 69.74 (76)    | 88.16             | 85.53         |
| ACC;N;PL             | 66.18 (68)        | 60.26 (78)    | 80.88             | 78.21         |
| INS;N;PL             | 40.38 (52)        | 32.05 (78)    | 84.62             | 79.49         |
| ESS;N;PL             | 76.92 (39)        | 56.41 (78)    | 100.00            | 96.15         |
| DAT;N;SG             | 64.15 (53)        | 52.63 (76)    | 81.13             | 69.74         |
| GEN;N;PL             | 62.90 (62)        | 57.14 (77)    | 85.48             | 80.52         |
| NFIN;V               | 22.16 (185)       | 15.03 (286)   | 98.92             | 99.3          |
| ADJ;NEUT;NOM;SG      | 86.67 (15)        | 86.67 (15)    | 93.33             | 93.33         |
| ADJ;FEM;NOM;SG       | 93.33 (15)        | 93.33 (15)    | 100.00            | 100           |
| ADJ;ESS;PL           | 86.67 (15)        | 86.67 (15)    | 100.00            | 100           |
| ACC;ADJ;MASC;SG      | 73.33 (15)        | 73.33 (15)    | 100.00            | 100           |
| ACC;ADJ;INAN;MASC;SG | 86.67 (15)        | 86.67 (15)    | 100.00            | 100           |
| ADJ;FEM;GEN;SG       | 64.29 (14)        | 66.67 (15)    | 92.86             | 93.33         |
| ADJ;GEN;NEUT;SG      | 73.33 (15)        | 73.33 (15)    | 100.00            | 100           |
| ADJ;DAT;MASC;SG      | 90.91 (11)        | 86.67 (15)    | 100.00            | 100           |
| ADJ;DAT;NEUT;SG      | 90.91 (11)        | 86.67 (15)    | 100.00            | 100           |
| ADJ;MASC;NOM;SG      | 86.67 (15)        | 86.67 (15)    | 100.00            | 100           |
| ACC;ADJ;FEM;SG       | 71.43 (14)        | 73.33 (15)    | 92.86             | 93.33         |
| ADJ;GEN;MASC;SG      | 73.33 (15)        | 73.33 (15)    | 100.00            | 100           |
| ADJ;DAT;PL           | 84.62 (13)        | 86.67 (15)    | 100.00            | 100           |
| ADJ;INS;PL           | 84.62 (13)        | 80.00 (15)    | 100.00            | 100           |
| ACC;ADJ;NEUT;SG      | 86.67 (15)        | 86.67 (15)    | 93.33             | 93.33         |
| ADJ;GEN;PL           | 86.67 (15)        | 86.67 (15)    | 100.00            | 100           |
| ACC;ADJ;MASC;PL      | 86.67 (15)        | 86.67 (15)    | 100.00            | 100           |
| ADJ;ESS;MASC;SG      | 75.00 (12)        | 73.33 (15)    | 91.67             | 93.33         |
| ADJ;ESS;FEM;SG       | 64.29 (14)        | 66.67 (15)    | 92.86             | 93.33         |
| ADJ;INS;MASC;SG      | 84.62 (13)        | 86.67 (15)    | 100.00            | 100           |
| ADJ;DAT;FEM;SG       | 64.29 (14)        | 66.67 (15)    | 92.86             | 93.33         |
| ADJ;ESS;NEUT;SG      | 75.00 (12)        | 73.33 (15)    | 91.67             | 93.33         |
| ADJ;MASC;NOM;PL      | 66.67 (6)         | 46.67 (15)    | 100.00            | 80            |
| 3;MASC;PST;SG;V      | 100.00 (1)        | 100.00 (2)    | 100.00            | 100           |
| 2;IMP;SG;V           | 100.00 (1)        | 100.00 (2)    | 100.00            | 100           |
| 3;PL;PRS;V           | 100.00 (2)        | 100.00 (2)    | 100.00            | 100           |
| 3;NEUT;PST;SG;V      | 100.00 (1)        | 100.00 (2)    | 100.00            | 100           |
| 1;PL;PRS;V           | 100.00 (1)        | 100.00 (2)    | 100.00            | 100           |
| 2;PL;PRS;V           | 0.00 (1)          | 50.00 (2)     | 0.00              | 50            |
| 1;IMP;PL;V           | -                 | 100.00 (2)    | -                 | 100           |
| 3;FEM;PL;PST;V       | 100.00 (1)        | 50.00 (2)     | 100.00            | 100           |
| 3;FEM;PST;SG;V       | 100.00 (1)        | 100.00 (2)    | 100.00            | 100           |
| 2;IMP;PL;V           | -                 | 100.00 (2)    | -                 | 100           |
| 3;PRS;SG;V           | 100.00 (2)        | 100.00 (2)    | 100.00            | 100           |
| 2;PRS;SG;V           | 100.00 (1)        | 50.00 (2)     | 100.00            | 50            |
| 3;MASC;PL;PST;V      | 100.00 (1)        | 50.00 (2)     | 100.00            | 100           |
| 1;PRS;SG;V           | 0.00 (1)          | 50.00 (2)     | 0.00              | 50            |
| 3;NEUT;PL;PST;V      | 100.00 (1)        | 50.00 (2)     | 100.00            | 100           |

Table 124: The performance of [Ruder et al. \(2018\)](#)’s model on translating words belonging to a specific morphological category for the Slovak–Czech language pair (the grey numbers correspond to the dictionary sizes).

| Slovak–Polish        |                   |               |                   |               |
|----------------------|-------------------|---------------|-------------------|---------------|
| Morph                | Normal (In vocab) | Normal (+OOV) | Lexeme (In vocab) | Lexeme (+OOV) |
| ALL                  | 40.36 (830)       | 32.72 (1094)  | 81.45             | 79.43         |
| ESS;N;SG             | 36.84 (76)        | 27.88 (104)   | 61.84             | 58.65         |
| GEN;N;PL             | 43.37 (83)        | 35.29 (102)   | 74.70             | 67.65         |
| N;NOM;SG             | 37.86 (103)       | 37.50 (104)   | 71.84             | 69.23         |
| INS;N;PL             | 33.33 (60)        | 21.57 (102)   | 98.33             | 98.04         |
| ACC;N;PL             | 41.84 (98)        | 39.22 (102)   | 78.57             | 75.49         |
| ACC;N;SG             | 40.00 (100)       | 38.46 (104)   | 71.00             | 70.19         |
| DAT;N;SG             | 30.88 (68)        | 20.19 (104)   | 63.24             | 53.85         |
| GEN;N;SG             | 42.86 (98)        | 39.42 (104)   | 79.59             | 75.96         |
| ESS;N;PL             | 57.69 (52)        | 36.27 (102)   | 98.08             | 95.1          |
| DAT;N;PL             | 48.98 (49)        | 27.45 (102)   | 85.71             | 80.39         |
| N;NOM;PL             | 39.80 (98)        | 37.25 (102)   | 79.59             | 76.47         |
| INS;N;SG             | 41.77 (79)        | 32.69 (104)   | 84.81             | 87.5          |
| NFIN;V               | 20.00 (35)        | 17.39 (46)    | 97.14             | 95.65         |
| ADJ;DAT;NEUT;SG      | 37.50 (8)         | 50.00 (12)    | 100.00            | 100           |
| ADJ;DAT;PL           | 41.67 (12)        | 41.67 (12)    | 100.00            | 100           |
| ADJ;NOM;PL           | 63.64 (11)        | 58.33 (12)    | 90.91             | 91.67         |
| ACC;ADJ;MASC;SG      | 50.00 (12)        | 58.33 (12)    | 100.00            | 100           |
| ADJ;ESS;PL           | 75.00 (12)        | 75.00 (12)    | 100.00            | 100           |
| ADJ;ESS;NEUT;SG      | 10.00 (10)        | 16.67 (12)    | 80.00             | 83.33         |
| ADJ;FEM;INS;SG       | 9.09 (11)         | 16.67 (12)    | 90.91             | 91.67         |
| ACC;ADJ;PL           | 63.64 (11)        | 58.33 (12)    | 90.91             | 91.67         |
| ADJ;MASC;NOM;SG      | 58.33 (12)        | 58.33 (12)    | 91.67             | 91.67         |
| ADJ;DAT;MASC;SG      | 37.50 (8)         | 50.00 (12)    | 100.00            | 100           |
| ACC;ADJ;FEM;SG       | 36.36 (11)        | 41.67 (12)    | 100.00            | 100           |
| ADJ;FEM;GEN;SG       | 81.82 (11)        | 75.00 (12)    | 100.00            | 100           |
| ADJ;FEM;NOM;SG       | 54.55 (11)        | 50.00 (12)    | 90.91             | 91.67         |
| ACC;ADJ;NEUT;SG      | 63.64 (11)        | 58.33 (12)    | 90.91             | 91.67         |
| ADJ;MASC;NOM;PL      | 37.50 (8)         | 25.00 (12)    | 100.00            | 91.67         |
| ADJ;ESS;FEM;SG       | 81.82 (11)        | 75.00 (12)    | 100.00            | 100           |
| ADJ;INS;PL           | 66.67 (9)         | 66.67 (12)    | 100.00            | 100           |
| ADJ;INS;MASC;SG      | 41.67 (12)        | 41.67 (12)    | 100.00            | 100           |
| ACC;ADJ;INAN;MASC;SG | 58.33 (12)        | 58.33 (12)    | 91.67             | 91.67         |
| ADJ;GEN;NEUT;SG      | 50.00 (12)        | 58.33 (12)    | 100.00            | 100           |
| ADJ;ESS;MASC;SG      | 10.00 (10)        | 16.67 (12)    | 80.00             | 83.33         |
| ADJ;DAT;FEM;SG       | 81.82 (11)        | 75.00 (12)    | 100.00            | 100           |
| ADJ;INS;NEUT;SG      | 41.67 (12)        | 41.67 (12)    | 100.00            | 100           |
| ADJ;GEN;MASC;SG      | 50.00 (12)        | 58.33 (12)    | 100.00            | 100           |
| ADJ;GEN;PL           | 75.00 (12)        | 75.00 (12)    | 100.00            | 100           |
| ADJ;NEUT;NOM;SG      | 63.64 (11)        | 58.33 (12)    | 90.91             | 91.67         |
| ACC;ADJ;MASC;PL      | 75.00 (12)        | 75.00 (12)    | 100.00            | 100           |
| 3;FEM;PL;PST;V       | -                 | 0.00 (1)      | -                 | 100           |
| 3;PRS;SG;V           | -                 | 0.00 (1)      | -                 | 100           |
| 3;MASC;PST;SG;V      | -                 | 0.00 (1)      | -                 | 100           |
| 2;IMP;SG;V           | -                 | 0.00 (1)      | -                 | 0             |
| 3;MASC;PL;PST;V      | -                 | 0.00 (1)      | -                 | 100           |
| 2;IMP;PL;V           | -                 | 0.00 (1)      | -                 | 0             |
| 2;PL;PRS;V           | -                 | 0.00 (1)      | -                 | 0             |
| 1;IMP;PL;V           | -                 | 0.00 (1)      | -                 | 0             |
| 3;PL;PRS;V           | -                 | 0.00 (1)      | -                 | 100           |
| 2;PRS;SG;V           | -                 | 0.00 (1)      | -                 | 100           |
| 1;PL;PRS;V           | -                 | 0.00 (1)      | -                 | 0             |
| 3;NEUT;PST;SG;V      | -                 | 0.00 (1)      | -                 | 100           |
| 3;FEM;PST;SG;V       | -                 | 0.00 (1)      | -                 | 100           |
| 1;PRS;SG;V           | -                 | 0.00 (1)      | -                 | 0             |

Table 125: The performance of [Ruder et al. \(2018\)](#)’s model on translating words belonging to a specific morphological category for the Slovak–Polish language pair (the grey numbers correspond to the dictionary sizes).

| Slovak–Russian       |                   |               |                   |               |
|----------------------|-------------------|---------------|-------------------|---------------|
| Morph                | Normal (In vocab) | Normal (+OOV) | Lexeme (In vocab) | Lexeme (+OOV) |
| ALL                  | 25.31 (814)       | 20.00 (1140)  | 83.54             | 81.67         |
| GEN;N;SG             | 26.39 (72)        | 23.75 (80)    | 81.94             | 81.25         |
| ACC;N;SG             | 26.03 (73)        | 23.75 (80)    | 64.38             | 62.5          |
| N;NOM;SG             | 25.64 (78)        | 25.00 (80)    | 70.51             | 67.5          |
| DAT;N;SG             | 26.92 (52)        | 18.75 (80)    | 71.15             | 62.5          |
| ESS;N;SG             | 24.53 (53)        | 17.50 (80)    | 71.70             | 57.5          |
| GEN;N;PL             | 23.44 (64)        | 18.29 (82)    | 67.19             | 59.76         |
| DAT;N;PL             | 33.33 (36)        | 21.69 (83)    | 94.44             | 87.95         |
| INS;N;PL             | 31.82 (44)        | 18.07 (83)    | 100.00            | 97.59         |
| N;NOM;PL             | 30.56 (72)        | 26.51 (83)    | 80.56             | 74.7          |
| ESS;N;PL             | 29.27 (41)        | 18.07 (83)    | 90.24             | 90.36         |
| INS;N;SG             | 33.33 (57)        | 25.00 (80)    | 89.47             | 91.25         |
| ACC;N;PL             | 37.21 (43)        | 29.09 (55)    | 81.40             | 76.36         |
| ADJ;DAT;NEUT;SG      | 18.18 (11)        | 17.65 (17)    | 100.00            | 100           |
| ACC;ADJ;FEM;SG       | 46.15 (13)        | 41.18 (17)    | 100.00            | 88.24         |
| ADJ;MASC;NOM;SG      | 41.18 (17)        | 41.18 (17)    | 82.35             | 82.35         |
| ADJ;GEN;PL           | 41.18 (17)        | 41.18 (17)    | 100.00            | 100           |
| ADJ;ESS;PL           | 41.18 (17)        | 41.18 (17)    | 100.00            | 100           |
| ADJ;NEUT;NOM;SG      | 31.25 (16)        | 35.29 (17)    | 75.00             | 76.47         |
| ACC;ADJ;INAN;MASC;SG | 41.18 (17)        | 41.18 (17)    | 82.35             | 82.35         |
| ADJ;NOM;PL           | 31.25 (16)        | 35.29 (17)    | 75.00             | 76.47         |
| ADJ;FEM;GEN;SG       | 33.33 (15)        | 35.29 (17)    | 100.00            | 100           |
| ADJ;FEM;NOM;SG       | 31.25 (16)        | 35.29 (17)    | 87.50             | 88.24         |
| ADJ;DAT;FEM;SG       | 33.33 (15)        | 35.29 (17)    | 100.00            | 100           |
| ADJ;GEN;MASC;SG      | 43.75 (16)        | 41.18 (17)    | 100.00            | 100           |
| ACC;ADJ;PL           | 31.25 (16)        | 35.29 (17)    | 75.00             | 76.47         |
| ACC;ADJ;NEUT;SG      | 31.25 (16)        | 35.29 (17)    | 75.00             | 76.47         |
| ADJ;GEN;NEUT;SG      | 43.75 (16)        | 41.18 (17)    | 100.00            | 100           |
| ADJ;ESS;NEUT;SG      | 31.25 (16)        | 29.41 (17)    | 75.00             | 70.59         |
| ADJ;DAT;MASC;SG      | 18.18 (11)        | 17.65 (17)    | 100.00            | 100           |
| ADJ;INS;PL           | 35.71 (14)        | 35.29 (17)    | 100.00            | 100           |
| ADJ;ESS;FEM;SG       | 33.33 (15)        | 35.29 (17)    | 100.00            | 100           |
| ADJ;INS;NEUT;SG      | 37.50 (16)        | 35.29 (17)    | 100.00            | 100           |
| ADJ;INS;MASC;SG      | 37.50 (16)        | 35.29 (17)    | 100.00            | 100           |
| ADJ;DAT;PL           | 37.50 (16)        | 35.29 (17)    | 100.00            | 100           |
| ACC;ADJ;MASC;SG      | 43.75 (16)        | 41.18 (17)    | 100.00            | 100           |
| ADJ;ESS;MASC;SG      | 31.25 (16)        | 29.41 (17)    | 75.00             | 70.59         |
| ADJ;FEM;INS;SG       | 0.00 (12)         | 0.00 (17)     | 75.00             | 76.47         |
| NFIN;V               | 3.82 (131)        | 2.44 (205)    | 95.42             | 95.61         |
| 2;PL;PRS;V           | 100.00 (1)        | 50.00 (2)     | 100.00            | 50            |
| 3;FEM;PL;PST;V       | 0.00 (1)          | 50.00 (2)     | 100.00            | 100           |
| 2;PRS;SG;V           | 0.00 (1)          | 0.00 (2)      | 0.00              | 0             |
| 2;IMP;PL;V           | -                 | 50.00 (2)     | -                 | 100           |
| 3;PRS;SG;V           | 50.00 (2)         | 50.00 (2)     | 50.00             | 50            |
| 3;NEUT;PST;SG;V      | 100.00 (1)        | 100.00 (2)    | 100.00            | 100           |
| 3;MASC;PL;PST;V      | 0.00 (1)          | 50.00 (2)     | 100.00            | 100           |
| 2;IMP;SG;V           | 0.00 (1)          | 0.00 (2)      | 0.00              | 0             |
| 3;MASC;PST;SG;V      | 100.00 (1)        | 100.00 (2)    | 100.00            | 100           |
| 3;FEM;PST;SG;V       | 100.00 (1)        | 100.00 (2)    | 100.00            | 100           |
| 1;PRS;SG;V           | 100.00 (1)        | 50.00 (2)     | 100.00            | 50            |
| 1;PL;PRS;V           | 100.00 (1)        | 50.00 (2)     | 100.00            | 50            |
| 3;PL;PRS;V           | 50.00 (2)         | 50.00 (2)     | 50.00             | 50            |

Table 126: The performance of [Ruder et al. \(2018\)](#)’s model on translating words belonging to a specific morphological category for the Slovak–Russian language pair (the grey numbers correspond to the dictionary sizes).

| Slovak–Ukrainian     |                   |               |                   |               |
|----------------------|-------------------|---------------|-------------------|---------------|
| Morph                | Normal (In vocab) | Normal (+OOV) | Lexeme (In vocab) | Lexeme (+OOV) |
| ALL                  | 45.45 (330)       | 38.12 (425)   | 84.24             | 82.35         |
| ACC;N;SG             | 40.91 (44)        | 39.13 (46)    | 79.55             | 76.09         |
| ACC;N;PL             | 42.86 (42)        | 39.13 (46)    | 88.1              | 86.96         |
| ESS;N;SG             | 35.29 (34)        | 26.09 (46)    | 70.59             | 56.52         |
| ESS;N;PL             | 62.50 (24)        | 39.13 (46)    | 83.33             | 89.13         |
| GEN;N;PL             | 45.95 (37)        | 39.13 (46)    | 89.19             | 80.43         |
| N;NOM;SG             | 41.30 (46)        | 41.30 (46)    | 80.43             | 80.43         |
| N;NOM;PL             | 42.86 (42)        | 39.13 (46)    | 88.1              | 86.96         |
| DAT;N;SG             | 30.30 (33)        | 23.91 (46)    | 63.64             | 54.35         |
| INS;N;PL             | 38.71 (31)        | 30.43 (46)    | 100               | 100           |
| GEN;N;SG             | 47.73 (44)        | 45.65 (46)    | 88.64             | 89.13         |
| INS;N;SG             | 37.14 (35)        | 30.43 (46)    | 80                | 82.61         |
| DAT;N;PL             | 54.55 (22)        | 36.96 (46)    | 86.36             | 86.96         |
| ADJ;GEN;MASC;SG      | 100.00 (2)        | 100.00 (2)    | 100               | 100           |
| ADJ;NEUT;NOM;SG      | 50.00 (2)         | 50.00 (2)     | 50                | 50            |
| ADJ;INS;PL           | 50.00 (2)         | 50.00 (2)     | 100               | 100           |
| ADJ;ESS;FEM;SG       | 50.00 (2)         | 50.00 (2)     | 100               | 100           |
| ACC;ADJ;FEM;SG       | 50.00 (2)         | 50.00 (2)     | 100               | 100           |
| ADJ;ESS;PL           | 50.00 (2)         | 50.00 (2)     | 100               | 100           |
| ADJ;INS;MASC;SG      | 100.00 (2)        | 100.00 (2)    | 100               | 100           |
| ADJ;DAT;PL           | 100.00 (2)        | 100.00 (2)    | 100               | 100           |
| ADJ;NOM;PL           | 50.00 (2)         | 50.00 (2)     | 50                | 50            |
| ACC;ADJ;MASC;SG      | 100.00 (2)        | 100.00 (2)    | 100               | 100           |
| ACC;ADJ;NEUT;SG      | 50.00 (2)         | 50.00 (2)     | 50                | 50            |
| ADJ;FEM;INS;SG       | 100.00 (2)        | 100.00 (2)    | 100               | 100           |
| ADJ;DAT;FEM;SG       | 50.00 (2)         | 50.00 (2)     | 100               | 100           |
| ACC;ADJ;INAN;MASC;SG | 50.00 (2)         | 50.00 (2)     | 100               | 100           |
| ADJ;FEM;NOM;SG       | 100.00 (2)        | 100.00 (2)    | 100               | 100           |
| ADJ;ESS;MASC;SG      | 50.00 (2)         | 50.00 (2)     | 50                | 50            |
| ADJ;DAT;MASC;SG      | 0.00 (1)          | 0.00 (2)      | 0                 | 0             |
| ACC;ADJ;PL           | 50.00 (2)         | 50.00 (2)     | 50                | 50            |
| ADJ;GEN;PL           | 50.00 (2)         | 50.00 (2)     | 100               | 100           |
| ADJ;FEM;GEN;SG       | 50.00 (2)         | 50.00 (2)     | 100               | 100           |
| ADJ;GEN;NEUT;SG      | 100.00 (2)        | 100.00 (2)    | 100               | 100           |
| ADJ;ESS;NEUT;SG      | 50.00 (2)         | 50.00 (2)     | 50                | 50            |
| ADJ;MASC;NOM;SG      | 50.00 (2)         | 50.00 (2)     | 100               | 100           |
| ADJ;DAT;NEUT;SG      | 0.00 (1)          | 0.00 (2)      | 0                 | 0             |
| ADJ;INS;NEUT;SG      | 100.00 (2)        | 100.00 (2)    | 100               | 100           |
| NFIN;V               | 33.33 (3)         | 25.00 (4)     | 100               | 100           |

Table 127: The performance of [Ruder et al. \(2018\)](#)’s model on translating words belonging to a specific morphological category for the Slovak–Ukrainian language pair (the grey numbers correspond to the dictionary sizes).

| Ukrainian–Czech      |                   |               |                   |               |
|----------------------|-------------------|---------------|-------------------|---------------|
| Morph                | Normal (In vocab) | Normal (+OOV) | Lexeme (In vocab) | Lexeme (+OOV) |
| ALL                  | 44.21 (699)       | 38.90 (869)   | 78.68             | 74.45         |
| N;PL;VOC             | 48.65 (74)        | 45.00 (80)    | 83.78             | 83.75         |
| ACC;N;PL             | 52.70 (74)        | 48.75 (80)    | 87.84             | 87.5          |
| INS;N;PL             | 32.31 (65)        | 28.75 (80)    | 81.54             | 77.5          |
| ACC;N;SG             | 54.43 (79)        | 51.22 (82)    | 77.22             | 73.17         |
| DAT;N;PL             | 58.54 (41)        | 42.50 (80)    | 95.12             | 92.5          |
| GEN;N;PL             | 51.39 (72)        | 47.50 (80)    | 79.17             | 76.25         |
| N;NOM;PL             | 48.65 (74)        | 45.00 (80)    | 83.78             | 83.75         |
| ESS;N;PL             | 46.94 (49)        | 35.00 (80)    | 87.76             | 81.25         |
| ESS;N;SG             | 36.76 (68)        | 33.33 (81)    | 72.06             | 66.67         |
| DAT;N;SG             | 36.92 (65)        | 34.15 (82)    | 63.08             | 58.54         |
| GEN;N;SG             | 58.23 (79)        | 56.10 (82)    | 84.81             | 81.71         |
| INS;N;SG             | 44.00 (75)        | 41.46 (82)    | 81.33             | 79.27         |
| N;NOM;SG             | 54.32 (81)        | 52.44 (82)    | 83.95             | 79.27         |
| N;SG;VOC             | 31.43 (35)        | 28.05 (82)    | 48.57             | 47.56         |
| 1;IMP;PL;V           | 0.00 (5)          | 0.00 (6)      | 60                | 50            |
| 3;NEUT;PST;SG;V      | 40.00 (5)         | 50.00 (6)     | 100               | 100           |
| NFIN;V               | 66.67 (6)         | 66.67 (6)     | 100               | 100           |
| 3;MASC;PST;SG;V      | 50.00 (6)         | 50.00 (6)     | 100               | 100           |
| 3;FEM;PST;SG;V       | 83.33 (6)         | 83.33 (6)     | 100               | 100           |
| 2;IMP;SG;V           | 0.00 (6)          | 0.00 (6)      | 33.33             | 33.33         |
| 2;IMP;PL;V           | 16.67 (6)         | 16.67 (6)     | 83.33             | 83.33         |
| 1;PRS;SG;V           | 25.00 (4)         | 20.00 (5)     | 50                | 40            |
| 3;PL;PRS;V           | 40.00 (5)         | 40.00 (5)     | 60                | 60            |
| 3;FEM;PL;PST;V       | 66.67 (6)         | 66.67 (6)     | 100               | 100           |
| 2;PL;PRS;V           | 50.00 (4)         | 20.00 (5)     | 100               | 100           |
| 3;PRS;SG;V           | 40.00 (5)         | 40.00 (5)     | 80                | 80            |
| 2;PRS;SG;V           | 40.00 (5)         | 40.00 (5)     | 80                | 80            |
| 3;MASC;PL;PST;V      | 66.67 (6)         | 66.67 (6)     | 100               | 100           |
| 1;PL;PRS;V           | 50.00 (4)         | 40.00 (5)     | 75                | 60            |
| 3;FUT;PL;V           | 0.00 (1)          | 0.00 (1)      | 0                 | 0             |
| 3;FUT;SG;V           | 0.00 (1)          | 0.00 (1)      | 0                 | 0             |
| 2;FUT;PL;V           | 0.00 (1)          | 0.00 (1)      | 0                 | 0             |
| 1;FUT;PL;V           | 0.00 (1)          | 0.00 (1)      | 100               | 100           |
| 2;FUT;SG;V           | 0.00 (1)          | 0.00 (1)      | 0                 | 0             |
| 1;FUT;SG;V           | 0.00 (1)          | 0.00 (1)      | 100               | 100           |
| ADJ;MASC;NOM;SG      | 0.00 (1)          | 0.00 (1)      | 100               | 100           |
| ADJ;ESS;PL           | 0.00 (1)          | 0.00 (1)      | 100               | 100           |
| ADJ;DAT;NEUT;SG      | 0.00 (1)          | 0.00 (1)      | 100               | 100           |
| ACC;ADJ;FEM;SG       | 0.00 (1)          | 0.00 (1)      | 100               | 100           |
| ACC;ADJ;MASC;SG      | 0.00 (1)          | 0.00 (1)      | 100               | 100           |
| ADJ;NEUT;NOM;SG      | 0.00 (1)          | 0.00 (1)      | 0                 | 0             |
| ADJ;GEN;NEUT;SG      | 0.00 (1)          | 0.00 (1)      | 100               | 100           |
| ADJ;INS;MASC;SG      | 0.00 (1)          | 0.00 (1)      | 100               | 100           |
| ADJ;FEM;NOM;SG       | 0.00 (1)          | 0.00 (1)      | 100               | 100           |
| ADJ;DAT;FEM;SG       | 0.00 (1)          | 0.00 (1)      | 0                 | 0             |
| ADJ;DAT;PL           | 0.00 (1)          | 0.00 (1)      | 100               | 100           |
| ADJ;ESS;NEUT;SG      | 0.00 (1)          | 0.00 (1)      | 100               | 100           |
| ADJ;FEM;GEN;SG       | 0.00 (1)          | 0.00 (1)      | 100               | 100           |
| ADJ;GEN;PL           | 0.00 (1)          | 0.00 (1)      | 100               | 100           |
| ADJ;DAT;MASC;SG      | 0.00 (1)          | 0.00 (1)      | 100               | 100           |
| ADJ;INS;PL           | 0.00 (1)          | 0.00 (1)      | 100               | 100           |
| ADJ;GEN;MASC;SG      | 0.00 (1)          | 0.00 (1)      | 100               | 100           |
| ACC;ADJ;NEUT;SG      | 0.00 (1)          | 0.00 (1)      | 0                 | 0             |
| ACC;ADJ;INAN;MASC;SG | 0.00 (1)          | 0.00 (1)      | 100               | 100           |
| ADJ;ESS;MASC;SG      | 0.00 (1)          | 0.00 (1)      | 100               | 100           |
| ADJ;ESS;FEM;SG       | 0.00 (1)          | 0.00 (1)      | 0                 | 0             |

Table 128: The performance of [Ruder et al. \(2018\)](#)’s model on translating words belonging to a specific morphological category for the Ukrainian–Czech language pair (the grey numbers correspond to the dictionary sizes).

| Ukrainian–Polish     |                   |               |                   |               |
|----------------------|-------------------|---------------|-------------------|---------------|
| Morph                | Normal (In vocab) | Normal (+OOV) | Lexeme (In vocab) | Lexeme (+OOV) |
| ALL                  | 54.59 (850)       | 47.25 (1054)  | 83.18             | 79.51         |
| INS;N;SG             | 56.25 (96)        | 51.43 (105)   | 91.67             | 89.52         |
| GEN;N;PL             | 48.96 (96)        | 46.60 (103)   | 67.71             | 68.93         |
| ACC;N;SG             | 58.82 (102)       | 57.14 (105)   | 86.27             | 84.76         |
| DAT;N;PL             | 62.75 (51)        | 44.66 (103)   | 92.16             | 87.38         |
| ACC;N;PL             | 67.68 (99)        | 65.05 (103)   | 91.92             | 89.32         |
| ESS;N;PL             | 68.12 (69)        | 54.37 (103)   | 92.75             | 93.2          |
| N;PL;VOC             | 66.00 (100)       | 64.08 (103)   | 92.00             | 89.32         |
| N;NOM;SG             | 56.19 (105)       | 56.19 (105)   | 85.71             | 84.76         |
| GEN;N;SG             | 60.78 (102)       | 59.05 (105)   | 92.16             | 88.57         |
| INS;N;PL             | 64.37 (87)        | 55.34 (103)   | 98.85             | 99.03         |
| ESS;N;SG             | 44.57 (92)        | 39.05 (105)   | 69.57             | 66.67         |
| N;SG;VOC             | 31.37 (51)        | 24.76 (105)   | 60.78             | 51.43         |
| N;NOM;PL             | 66.00 (100)       | 64.08 (103)   | 92.00             | 89.32         |
| DAT;N;SG             | 42.50 (80)        | 33.33 (105)   | 65.00             | 61.9          |
| 2;IMP;PL;V           | -                 | 0.00 (2)      | -                 | 0             |
| 2;FEM;PL;PST;V       | -                 | 50.00 (2)     | -                 | 100           |
| 1;PL;PRS;V           | 0.00 (2)          | 0.00 (2)      | 50.00             | 50            |
| 2;PRS;SG;V           | 0.00 (2)          | 0.00 (2)      | 50.00             | 50            |
| 3;MASC;PL;PST;V      | 50.00 (2)         | 50.00 (2)     | 100.00            | 100           |
| 2;PL;PRS;V           | 0.00 (1)          | 0.00 (2)      | 0.00              | 0             |
| 1;FEM;PL;PST;V       | -                 | 50.00 (2)     | -                 | 100           |
| 3;FEM;PST;SG;V       | 100.00 (1)        | 50.00 (2)     | 100.00            | 50            |
| 2;FEM;PST;SG;V       | -                 | 50.00 (2)     | -                 | 50            |
| 1;PRS;SG;V           | 0.00 (2)          | 0.00 (2)      | 50.00             | 50            |
| 3;PRS;SG;V           | 50.00 (2)         | 50.00 (2)     | 100.00            | 100           |
| 3;NEUT;PST;SG;V      | 100.00 (1)        | 50.00 (2)     | 100.00            | 50            |
| 1;MASC;PL;PST;V      | 100.00 (1)        | 50.00 (2)     | 100.00            | 100           |
| 3;MASC;PST;SG;V      | 0.00 (2)          | 0.00 (2)      | 100.00            | 100           |
| 1;IMP;PL;V           | -                 | 0.00 (2)      | -                 | 0             |
| 2;MASC;PL;PST;V      | -                 | 50.00 (2)     | -                 | 100           |
| 3;FEM;PL;PST;V       | 100.00 (1)        | 50.00 (2)     | 100.00            | 100           |
| 2;MASC;PST;SG;V      | 0.00 (1)          | 0.00 (2)      | 100.00            | 100           |
| 3;PL;PRS;V           | 50.00 (2)         | 50.00 (2)     | 100.00            | 100           |
| NFIN;V               | 0.00 (2)          | 0.00 (2)      | 50.00             | 50            |
| 1;FEM;PST;SG;V       | 100.00 (1)        | 50.00 (2)     | 100.00            | 50            |
| 2;IMP;SG;V           | 0.00 (1)          | 0.00 (2)      | 100.00            | 50            |
| 1;MASC;PST;SG;V      | 0.00 (1)          | 0.00 (2)      | 100.00            | 100           |
| ADJ;ESS;MASC;SG      | 50.00 (2)         | 50.00 (2)     | 100.00            | 100           |
| ADJ;MASC;NOM;SG      | 50.00 (2)         | 50.00 (2)     | 100.00            | 100           |
| ADJ;GEN;NEUT;SG      | 50.00 (2)         | 50.00 (2)     | 100.00            | 100           |
| ADJ;NOM;PL           | 100.00 (2)        | 100.00 (2)    | 100.00            | 100           |
| ADJ;NEUT;NOM;SG      | 50.00 (2)         | 50.00 (2)     | 100.00            | 100           |
| ACC;ADJ;NEUT;SG      | 50.00 (2)         | 50.00 (2)     | 100.00            | 100           |
| ADJ;INS;NEUT;SG      | 0.00 (2)          | 0.00 (2)      | 100.00            | 100           |
| ADJ;DAT;PL           | 0.00 (2)          | 0.00 (2)      | 100.00            | 100           |
| ADJ;INS;PL           | 100.00 (2)        | 100.00 (2)    | 100.00            | 100           |
| ADJ;FEM;INS;SG       | 100.00 (2)        | 100.00 (2)    | 100.00            | 100           |
| ACC;ADJ;FEM;SG       | 50.00 (2)         | 50.00 (2)     | 100.00            | 100           |
| ADJ;FEM;NOM;SG       | 50.00 (2)         | 50.00 (2)     | 100.00            | 100           |
| ADJ;FEM;GEN;SG       | 50.00 (2)         | 50.00 (2)     | 100.00            | 100           |
| ADJ;GEN;MASC;SG      | 50.00 (2)         | 50.00 (2)     | 100.00            | 100           |
| ADJ;DAT;MASC;SG      | 50.00 (2)         | 50.00 (2)     | 100.00            | 100           |
| ADJ;INS;MASC;SG      | 0.00 (2)          | 0.00 (2)      | 100.00            | 100           |
| ADJ;ESS;NEUT;SG      | 50.00 (2)         | 50.00 (2)     | 100.00            | 100           |
| ADJ;GEN;PL           | 50.00 (2)         | 50.00 (2)     | 100.00            | 100           |
| ACC;ADJ;PL           | 50.00 (2)         | 50.00 (2)     | 100.00            | 100           |
| ACC;ADJ;MASC;SG      | 50.00 (2)         | 50.00 (2)     | 100.00            | 100           |
| ACC;ADJ;INAN;MASC;SG | 50.00 (2)         | 50.00 (2)     | 100.00            | 100           |
| ADJ;ESS;FEM;SG       | 50.00 (2)         | 50.00 (2)     | 50.00             | 50            |
| ADJ;ESS;PL           | 50.00 (2)         | 50.00 (2)     | 100.00            | 100           |
| ADJ;DAT;NEUT;SG      | 50.00 (2)         | 50.00 (2)     | 100.00            | 100           |
| ADJ;DAT;FEM;SG       | 50.00 (2)         | 50.00 (2)     | 50.00             | 50            |

Table 129: The performance of [Ruder et al. \(2018\)](#)’s model on translating words belonging to a specific morphological category for the Ukrainian–Polish language pair (the grey numbers correspond to the dictionary sizes).



| Ukrainian–Russian    |                   |               |                   |               |
|----------------------|-------------------|---------------|-------------------|---------------|
| Morph                | Normal (In vocab) | Normal (+OOV) | Lexeme (In vocab) | Lexeme (+OOV) |
| ALL                  | 68.45 (786)       | 63.67 (933)   | 89.95             | 88.64         |
| ESS;N;SG             | 63.64 (88)        | 60.61 (99)    | 82.95             | 79.8          |
| INS;N;PL             | 81.58 (76)        | 68.37 (98)    | 98.68             | 100           |
| ACC;N;SG             | 70.10 (97)        | 68.69 (99)    | 92.78             | 91.92         |
| GEN;N;PL             | 67.05 (88)        | 61.22 (98)    | 84.09             | 77.55         |
| GEN;N;SG             | 76.04 (96)        | 73.74 (99)    | 94.79             | 92.93         |
| DAT;N;PL             | 77.36 (53)        | 63.27 (98)    | 92.45             | 93.88         |
| N;NOM;SG             | 69.70 (99)        | 69.70 (99)    | 91.92             | 91.92         |
| INS;N;SG             | 72.04 (93)        | 69.70 (99)    | 94.62             | 92.93         |
| N;NOM;PL             | 68.04 (97)        | 67.35 (98)    | 88.66             | 88.78         |
| DAT;N;SG             | 59.09 (88)        | 54.55 (99)    | 78.41             | 73.74         |
| ESS;N;PL             | 83.64 (55)        | 70.41 (98)    | 96.36             | 91.84         |
| ACC;N;PL             | 61.02 (59)        | 62.30 (61)    | 83.05             | 83.61         |
| ADJ;FEM;NOM;SG       | 0.00 (2)          | 0.00 (2)      | 50                | 50            |
| ACC;ADJ;NEUT;SG      | 0.00 (2)          | 0.00 (2)      | 100               | 100           |
| ACC;ADJ;FEM;SG       | 0.00 (2)          | 0.00 (2)      | 100               | 100           |
| ADJ;DAT;PL           | 0.00 (2)          | 0.00 (2)      | 100               | 100           |
| ADJ;ESS;NEUT;SG      | 0.00 (1)          | 0.00 (2)      | 100               | 100           |
| ADJ;MASC;NOM;SG      | 0.00 (2)          | 0.00 (2)      | 50                | 50            |
| ADJ;FEM;GEN;SG       | 0.00 (2)          | 0.00 (2)      | 100               | 100           |
| ADJ;ESS;FEM;SG       | 0.00 (2)          | 0.00 (2)      | 50                | 0             |
| ACC;ADJ;INAN;MASC;SG | 0.00 (2)          | 0.00 (2)      | 50                | 50            |
| ADJ;NOM;PL           | 0.00 (2)          | 0.00 (2)      | 50                | 50            |
| ACC;ADJ;MASC;SG      | 0.00 (2)          | 0.00 (2)      | 100               | 100           |
| ADJ;DAT;FEM;SG       | 0.00 (2)          | 0.00 (2)      | 50                | 0             |
| ADJ;INS;PL           | 0.00 (2)          | 0.00 (2)      | 100               | 100           |
| ADJ;INS;MASC;SG      | 0.00 (2)          | 0.00 (2)      | 100               | 100           |
| ADJ;GEN;NEUT;SG      | 0.00 (2)          | 0.00 (2)      | 100               | 100           |
| ADJ;FEM;INS;SG       | 0.00 (2)          | 0.00 (2)      | 50                | 50            |
| ACC;ADJ;INAN;PL      | 0.00 (2)          | 0.00 (2)      | 50                | 50            |
| ADJ;ESS;PL           | 0.00 (2)          | 0.00 (2)      | 100               | 100           |
| ADJ;GEN;PL           | 0.00 (2)          | 0.00 (2)      | 100               | 100           |
| ADJ;NEUT;NOM;SG      | 0.00 (2)          | 0.00 (2)      | 100               | 100           |
| ADJ;INS;NEUT;SG      | 0.00 (2)          | 0.00 (2)      | 100               | 100           |
| ADJ;ESS;MASC;SG      | 0.00 (1)          | 0.00 (2)      | 100               | 100           |
| ADJ;DAT;MASC;SG      | 0.00 (1)          | 0.00 (2)      | 100               | 100           |
| ACC;ADJ;PL           | 0.00 (2)          | 0.00 (2)      | 100               | 100           |
| ADJ;DAT;NEUT;SG      | 0.00 (1)          | 0.00 (2)      | 100               | 100           |
| ADJ;GEN;MASC;SG      | 0.00 (2)          | 0.00 (2)      | 100               | 100           |
| 1;FEM;PST;SG;V       | 66.67 (3)         | 66.67 (3)     | 100               | 100           |
| 2;MASC;PST;SG;V      | 66.67 (3)         | 66.67 (3)     | 100               | 100           |
| 2;IMP;SG;V           | 33.33 (3)         | 33.33 (3)     | 33.33             | 66.67         |
| 2;FEM;PL;PST;V       | 66.67 (3)         | 66.67 (3)     | 100               | 100           |
| 3;PL;PRS;V           | 66.67 (3)         | 66.67 (3)     | 100               | 100           |
| 1;PRS;SG;V           | 66.67 (3)         | 66.67 (3)     | 100               | 100           |
| 2;MASC;PL;PST;V      | 66.67 (3)         | 66.67 (3)     | 100               | 100           |
| 2;PRS;SG;V           | 100.00 (2)        | 66.67 (3)     | 100               | 100           |
| 1;FEM;PL;PST;V       | 66.67 (3)         | 66.67 (3)     | 100               | 100           |
| 1;PL;PRS;V           | 100.00 (2)        | 66.67 (3)     | 100               | 100           |
| NFIN;V               | 66.67 (3)         | 66.67 (3)     | 100               | 100           |
| 1;MASC;PST;SG;V      | 66.67 (3)         | 66.67 (3)     | 100               | 100           |
| 2;IMP;PL;V           | 50.00 (2)         | 33.33 (3)     | 100               | 66.67         |
| 3;PRS;SG;V           | 66.67 (3)         | 66.67 (3)     | 100               | 100           |
| 1;MASC;PL;PST;V      | 66.67 (3)         | 66.67 (3)     | 100               | 100           |
| 3;NEUT;PST;SG;V      | 66.67 (3)         | 66.67 (3)     | 100               | 100           |
| 2;PL;PRS;V           | 50.00 (2)         | 33.33 (3)     | 50                | 66.67         |
| 2;FEM;PST;SG;V       | 66.67 (3)         | 66.67 (3)     | 100               | 100           |
| 3;MASC;PL;PST;V      | 66.67 (3)         | 66.67 (3)     | 100               | 100           |
| 3;MASC;PST;SG;V      | 66.67 (3)         | 66.67 (3)     | 100               | 100           |
| 3;FEM;PST;SG;V       | 66.67 (3)         | 66.67 (3)     | 100               | 100           |
| 3;FEM;PL;PST;V       | 66.67 (3)         | 66.67 (3)     | 100               | 100           |

Table 130: The performance of [Ruder et al. \(2018\)](#)’s model on translating words belonging to a specific morphological category for the Ukrainian–Russian language pair (the grey numbers correspond to the dictionary sizes).

| Ukrainian–Slovak     |                   |               |                   |               |
|----------------------|-------------------|---------------|-------------------|---------------|
| Morph                | Normal (In vocab) | Normal (+OOV) | Lexeme (In vocab) | Lexeme (+OOV) |
| ALL                  | 39.13 (322)       | 31.67 (420)   | 81.99             | 80.24         |
| ESS;N;SG             | 39.39 (33)        | 28.89 (45)    | 81.82             | 68.89         |
| ACC;N;SG             | 35.71 (42)        | 34.78 (46)    | 80.95             | 78.26         |
| ACC;N;PL             | 29.27 (41)        | 26.67 (45)    | 82.93             | 80            |
| GEN;N;PL             | 34.21 (38)        | 28.26 (46)    | 73.68             | 69.57         |
| N;NOM;PL             | 28.57 (42)        | 26.67 (45)    | 83.33             | 80            |
| ESS;N;PL             | 59.09 (22)        | 33.33 (45)    | 95.45             | 93.33         |
| N;NOM;SG             | 37.78 (45)        | 36.96 (46)    | 77.78             | 76.09         |
| INS;N;PL             | 46.67 (30)        | 35.56 (45)    | 100               | 100           |
| DAT;N;PL             | 50.00 (20)        | 28.89 (45)    | 75                | 77.78         |
| DAT;N;SG             | 40.54 (37)        | 32.61 (46)    | 81.08             | 69.57         |
| INS;N;SG             | 28.95 (38)        | 23.91 (46)    | 84.21             | 82.61         |
| GEN;N;SG             | 38.64 (44)        | 36.96 (46)    | 86.36             | 84.78         |
| NFIN;V               | 100.00 (2)        | 100.00 (2)    | 100               | 100           |
| ACC;ADJ;NEUT;SG      | 0.00 (1)          | 0.00 (1)      | 100               | 100           |
| ADJ;GEN;PL           | 100.00 (1)        | 100.00 (1)    | 100               | 100           |
| ADJ;FEM;INS;SG       | 100.00 (1)        | 100.00 (1)    | 100               | 100           |
| ADJ;DAT;MASC;SG      | 0.00 (1)          | 0.00 (1)      | 100               | 100           |
| ADJ;DAT;NEUT;SG      | 0.00 (1)          | 0.00 (1)      | 100               | 100           |
| ADJ;FEM;NOM;SG       | 100.00 (1)        | 100.00 (1)    | 100               | 100           |
| ADJ;DAT;FEM;SG       | 0.00 (1)          | 0.00 (1)      | 0                 | 0             |
| ADJ;ESS;MASC;SG      | 0.00 (1)          | 0.00 (1)      | 100               | 100           |
| ACC;ADJ;MASC;SG      | 100.00 (1)        | 100.00 (1)    | 100               | 100           |
| ACC;ADJ;PL           | 100.00 (1)        | 100.00 (1)    | 100               | 100           |
| ADJ;INS;MASC;SG      | 0.00 (1)          | 0.00 (1)      | 100               | 100           |
| ADJ;INS;PL           | 100.00 (1)        | 100.00 (1)    | 100               | 100           |
| ADJ;FEM;GEN;SG       | 0.00 (1)          | 0.00 (1)      | 100               | 100           |
| ADJ;DAT;PL           | 0.00 (1)          | 0.00 (1)      | 100               | 100           |
| ADJ;MASC;NOM;SG      | 100.00 (1)        | 100.00 (1)    | 100               | 100           |
| ACC;ADJ;FEM;SG       | 100.00 (1)        | 100.00 (1)    | 100               | 100           |
| ADJ;NEUT;NOM;SG      | 0.00 (1)          | 0.00 (1)      | 100               | 100           |
| ADJ;INS;NEUT;SG      | 0.00 (1)          | 0.00 (1)      | 100               | 100           |
| ADJ;NOM;PL           | 100.00 (1)        | 100.00 (1)    | 100               | 100           |
| ADJ;ESS;FEM;SG       | 0.00 (1)          | 0.00 (1)      | 0                 | 0             |
| ADJ;GEN;NEUT;SG      | 100.00 (1)        | 100.00 (1)    | 100               | 100           |
| ACC;ADJ;INAN;MASC;SG | 100.00 (1)        | 100.00 (1)    | 100               | 100           |
| ADJ;ESS;NEUT;SG      | 0.00 (1)          | 0.00 (1)      | 100               | 100           |
| ADJ;ESS;PL           | 100.00 (1)        | 100.00 (1)    | 100               | 100           |
| ADJ;GEN;MASC;SG      | 100.00 (1)        | 100.00 (1)    | 100               | 100           |

Table 131: The performance of [Ruder et al. \(2018\)](#)’s model on translating words belonging to a specific morphological category for the Ukrainian–Slovak language pair (the grey numbers correspond to the dictionary sizes).

| Polish–Spanish       |                   |               |                   |               |
|----------------------|-------------------|---------------|-------------------|---------------|
| Morph                | Normal (In vocab) | Normal (+OOV) | Lexeme (In vocab) | Lexeme (+OOV) |
| ALL                  | 36.09 (8964)      | 28.25 (12759) | 78.10             | 68.56         |
| ACC;N;PL             | 40.15 (827)       | 38.12 (884)   | 85.97             | 84.05         |
| ACC;N;SG             | 39.48 (922)       | 38.05 (962)   | 80.15             | 79.42         |
| DAT;N;PL             | 19.74 (304)       | 13.17 (881)   | 55.26             | 53.92         |
| DAT;N;SG             | 30.22 (599)       | 21.96 (961)   | 75.29             | 67.43         |
| ESS;N;PL             | 32.79 (552)       | 25.88 (881)   | 82.43             | 79.23         |
| ESS;N;SG             | 32.51 (766)       | 28.68 (959)   | 77.15             | 72.89         |
| GEN;N;PL             | 40.66 (782)       | 36.75 (887)   | 83.63             | 79.71         |
| GEN;N;SG             | 42.02 (933)       | 40.64 (962)   | 86.60             | 86.28         |
| INS;N;PL             | 31.35 (622)       | 25.20 (881)   | 79.58             | 77.87         |
| INS;N;SG             | 35.96 (837)       | 32.74 (962)   | 79.93             | 79.11         |
| N;NOM;PL             | 39.83 (826)       | 37.94 (883)   | 85.35             | 83.47         |
| N;NOM;SG             | 40.84 (950)       | 40.33 (962)   | 84.63             | 84.2          |
| N;PL;VOC             | 39.83 (826)       | 37.94 (883)   | 85.35             | 83.47         |
| N;SG;VOC             | 32.44 (561)       | 28.20 (961)   | 75.22             | 70.76         |
| 1;COND;FEM;PL;V      | -                 | 6.25 (48)     | -                 | 39.58         |
| 1;COND;FEM;SG;V      | 0.00 (1)          | 0.00 (48)     | 0.00              | 0             |
| 1;COND;MASC;PL;V     | 25.00 (4)         | 27.08 (48)    | 75.00             | 81.25         |
| 1;COND;MASC;SG;V     | 0.00 (8)          | 0.00 (48)     | 0.00              | 0             |
| 1;FEM;PL;PST;V       | -                 | 1.61 (62)     | -                 | 11.29         |
| 1;FEM;PST;SG;V       | 12.50 (16)        | 8.06 (62)     | 25.00             | 9.68          |
| 1;IMP;PL;V           | 0.00 (8)          | 2.08 (48)     | 12.50             | 12.5          |
| 1;MASC;PL;PST;V      | 30.77 (13)        | 8.06 (62)     | 46.15             | 32.26         |
| 1;MASC;PST;SG;V      | 10.00 (30)        | 4.84 (62)     | 20.00             | 4.84          |
| 1;PL;PRS;V           | 37.93 (29)        | 25.00 (48)    | 51.72             | 39.58         |
| 1;PRS;SG;V           | 13.51 (37)        | 10.42 (48)    | 21.62             | 12.5          |
| 2;COND;FEM;PL;V      | -                 | 0.00 (48)     | -                 | 0             |
| 2;COND;FEM;SG;V      | 0.00 (1)          | 4.17 (48)     | 0.00              | 6.25          |
| 2;COND;MASC;PL;V     | -                 | 0.00 (48)     | -                 | 2.08          |
| 2;COND;MASC;SG;V     | 0.00 (2)          | 6.25 (48)     | 0.00              | 6.25          |
| 2;FEM;PL;PST;V       | -                 | 0.00 (62)     | -                 | 0             |
| 2;FEM;PST;SG;V       | 0.00 (4)          | 8.06 (62)     | 25.00             | 17.74         |
| 2;IMP;PL;V           | 0.00 (6)          | 0.00 (48)     | 0.00              | 0             |
| 2;IMP;SG;V           | 8.00 (25)         | 8.33 (48)     | 12.00             | 12.5          |
| 2;MASC;PL;PST;V      | 0.00 (1)          | 0.00 (62)     | 0.00              | 1.61          |
| 2;MASC;PST;SG;V      | 10.00 (10)        | 6.45 (62)     | 20.00             | 9.68          |
| 2;PL;PRS;V           | 11.11 (9)         | 0.00 (48)     | 22.22             | 2.08          |
| 2;PRS;SG;V           | 8.70 (23)         | 6.25 (48)     | 21.74             | 10.42         |
| 3;COND;FEM;PL;V      | 12.50 (8)         | 16.67 (48)    | 37.50             | 39.58         |
| 3;COND;FEM;SG;V      | 33.33 (9)         | 18.75 (48)    | 55.56             | 33.33         |
| 3;COND;MASC;PL;V     | 0.00 (4)          | 2.08 (48)     | 25.00             | 14.58         |
| 3;COND;MASC;SG;V     | 33.33 (12)        | 16.67 (48)    | 58.33             | 31.25         |
| 3;COND;NEUT;SG;V     | 14.29 (7)         | 10.42 (48)    | 28.57             | 16.67         |
| 3;FEM;PL;PST;V       | 48.84 (43)        | 43.55 (62)    | 74.42             | 74.19         |
| 3;FEM;PST;SG;V       | 37.25 (51)        | 32.26 (62)    | 58.82             | 54.84         |
| 3;MASC;PL;PST;V      | 22.45 (49)        | 19.35 (62)    | 55.10             | 46.77         |
| 3;MASC;PST;SG;V      | 33.33 (54)        | 29.03 (62)    | 62.96             | 59.68         |
| 3;NEUT;PST;SG;V      | 11.90 (42)        | 8.06 (62)     | 19.05             | 16.13         |
| 3;PL;PRS;V           | 50.00 (42)        | 45.83 (48)    | 80.95             | 77.08         |
| 3;PRS;SG;V           | 36.96 (46)        | 35.42 (48)    | 56.52             | 54.17         |
| NFIN;V               | 40.43 (47)        | 39.58 (48)    | 95.74             | 95.83         |
| ACC;ADJ;FEM;SG       | 46.89 (177)       | 44.68 (188)   | 80.79             | 80.32         |
| ACC;ADJ;INAN;MASC;SG | 48.94 (188)       | 48.42 (190)   | 92.02             | 91.58         |
| ACC;ADJ;MASC;PL      | 54.19 (179)       | 51.32 (189)   | 97.21             | 97.35         |
| ACC;ADJ;MASC;SG      | 45.36 (183)       | 43.68 (190)   | 85.25             | 85.26         |
| ACC;ADJ;PL           | 54.59 (185)       | 52.91 (189)   | 94.05             | 93.65         |
| ADJ;DAT;FEM;SG       | 45.20 (177)       | 42.55 (188)   | 80.23             | 79.79         |
| ADJ;DAT;MASC;SG      | 14.42 (104)       | 13.68 (190)   | 50.96             | 52.63         |
| ADJ;DAT;PL           | 39.44 (180)       | 37.57 (189)   | 91.11             | 91.01         |
| ADJ;ESS;FEM;SG       | 45.20 (177)       | 42.55 (188)   | 80.23             | 79.79         |
| ADJ;ESS;MASC;SG      | 39.23 (181)       | 37.37 (190)   | 91.16             | 91.05         |
| ADJ;ESS;PL           | 54.19 (179)       | 51.32 (189)   | 97.21             | 97.35         |
| ADJ;FEM;GEN;SG       | 45.20 (177)       | 42.55 (188)   | 80.23             | 79.79         |
| ADJ;FEM;INS;SG       | 46.89 (177)       | 44.68 (188)   | 80.79             | 80.32         |
| ADJ;FEM;NOM;SG       | 49.45 (182)       | 47.87 (188)   | 91.76             | 91.49         |
| ADJ;GEN;MASC;SG      | 45.36 (183)       | 43.68 (190)   | 85.25             | 85.26         |
| ADJ;GEN;PL           | 54.19 (179)       | 51.32 (189)   | 97.21             | 97.35         |
| ADJ;INS;MASC;SG      | 39.23 (181)       | 37.37 (190)   | 91.16             | 91.05         |
| ADJ;INS;PL           | 34.84 (155)       | 31.22 (189)   | 73.55             | 75.66         |
| ADJ;MASC;NOM;PL      | 28.21 (117)       | 20.63 (189)   | 63.25             | 55.03         |
| ADJ;MASC;NOM;SG      | 48.94 (188)       | 48.42 (190)   | 92.02             | 91.58         |
| ADJ;NOM;PL           | 54.59 (185)       | 52.91 (189)   | 94.05             | 93.65         |

Table 132: The performance of [Ruder et al. \(2018\)](#)’s model on translating words belonging to a specific morphological category for the Polish–Spanish language pair (the grey numbers correspond to the dictionary sizes).

| Morph           | Spanish–Polish    |               |                   |               |
|-----------------|-------------------|---------------|-------------------|---------------|
|                 | Normal (In vocab) | Normal (+OOV) | Lexeme (In vocab) | Lexeme (+OOV) |
| ALL             | 28.10 (4270)      | 21.02 (6095)  | 81.17             | 64.25         |
| N;PL            | 31.61 (1139)      | 30.02 (1226)  | 87.53             | 87.68         |
| N;SG            | 33.66 (1316)      | 33.18 (1338)  | 87.01             | 85.5          |
| ADJ;FEM;PL      | 42.13 (235)       | 41.60 (238)   | 98.30             | 97.9          |
| ADJ;FEM;SG      | 33.05 (236)       | 32.92 (240)   | 86.86             | 87.5          |
| ADJ;MASC;PL     | 41.53 (236)       | 41.15 (243)   | 96.61             | 96.71         |
| ADJ;MASC;SG     | 37.04 (243)       | 37.04 (243)   | 87.65             | 87.24         |
| 1;COND;PL;V     | 50.00 (2)         | 16.22 (111)   | 50.00             | 72.07         |
| 1;COND;SG;V     | 7.41 (27)         | 9.01 (111)    | 44.44             | 51.35         |
| 1;IMP;PL;POS;V  | 0.00 (22)         | 0.00 (116)    | 13.64             | 7.76          |
| 1;IPFV;PL;PST;V | 23.08 (13)        | 10.81 (111)   | 92.31             | 79.28         |
| 1;IPFV;PST;SG;V | 19.35 (62)        | 16.22 (111)   | 75.81             | 63.96         |
| 1;PFV;PL;PST;V  | 15.38 (26)        | 13.51 (111)   | 73.08             | 55.86         |
| 1;PFV;PST;SG;V  | 7.14 (42)         | 3.60 (111)    | 64.29             | 34.23         |
| 1;PL;PRS;V      | 12.24 (49)        | 15.22 (92)    | 79.59             | 61.96         |
| 1;PRS;SG;V      | 12.70 (63)        | 10.99 (91)    | 46.03             | 32.97         |
| 2;COND;PL;V     | -                 | 3.60 (111)    | -                 | 22.52         |
| 2;COND;SG;V     | 100.00 (1)        | 6.31 (111)    | 100.00            | 15.32         |
| 2;IMP;PL;POS;V  | 0.00 (17)         | 0.00 (116)    | 0.00              | 2.59          |
| 2;IMP;POS;SG;V  | 20.24 (84)        | 17.24 (116)   | 44.05             | 41.38         |
| 2;IPFV;PL;PST;V | -                 | 0.90 (111)    | -                 | 5.41          |
| 2;IPFV;PST;SG;V | 0.00 (11)         | 0.90 (111)    | 18.18             | 11.71         |
| 2;PFV;PL;PST;V  | -                 | 0.00 (111)    | -                 | 0.9           |
| 2;PFV;PST;SG;V  | 6.67 (15)         | 5.41 (111)    | 46.67             | 36.94         |
| 2;PL;PRS;V      | 0.00 (13)         | 1.09 (92)     | 7.69              | 4.35          |
| 2;PRS;SG;V      | 15.91 (44)        | 7.61 (92)     | 29.55             | 13.04         |
| 3;COND;PL;V     | 10.53 (19)        | 0.90 (111)    | 47.37             | 14.41         |
| 3;COND;SG;V     | 7.89 (38)         | 9.01 (111)    | 44.74             | 51.35         |
| 3;IPFV;PL;PST;V | 17.39 (92)        | 15.32 (111)   | 56.52             | 50.45         |
| 3;IPFV;PST;SG;V | 17.53 (97)        | 16.22 (111)   | 73.20             | 63.96         |
| 3;PFV;PL;PST;V  | 13.19 (91)        | 11.71 (111)   | 78.02             | 77.48         |
| 3;PFV;PST;SG;V  | 8.08 (99)         | 7.21 (111)    | 75.76             | 68.47         |
| 3;PL;PRS;V      | 20.73 (82)        | 19.57 (92)    | 70.73             | 66.3          |
| 3;PRS;SG;V      | 20.45 (88)        | 19.57 (92)    | 51.14             | 47.83         |
| NFIN;V          | 15.18 (112)       | 14.66 (116)   | 85.71             | 75.86         |
| 1;FUT;PL;V      | 16.67 (12)        | 8.33 (36)     | 100.00            | 47.22         |
| 1;FUT;SG;V      | 0.00 (14)         | 2.78 (36)     | 28.57             | 16.67         |
| 2;FUT;PL;V      | 0.00 (1)          | 0.00 (36)     | 0.00              | 0             |
| 2;FUT;SG;V      | 0.00 (5)          | 5.56 (36)     | 60.00             | 25            |
| 3;FUT;PL;V      | 0.00 (17)         | 5.56 (36)     | 58.82             | 44.44         |
| 3;FUT;SG;V      | 0.00 (28)         | 0.00 (36)     | 53.57             | 36.11         |

Table 133: The performance of [Ruder et al. \(2018\)](#)’s model on translating words belonging to a specific morphological category for the Spanish–Polish language pair (the grey numbers correspond to the dictionary sizes).
